# Supplementary material
Source: MDPI journal article supplement (https://www.mdpi.com/2073-4352/12/2/129)
Supplement: s1 [file s1]

dtindex: Copyright (c) 1998, 1996 Molecular Structure Corporation

d\*TREK version 8.0SSI -- Oct 31 2003

Command line:

```
dtindex input.head dtfind.ref -dps -sigma 5.000000 -reso 100.00 3.00 ¥  
-diffs -nodeice -maxresid 3.00 -prompt -nobeamcheck -out ¥  
output.head
```

Header of file input.head successfully read.

Reflection list: dtfind.ref

CrefInlist::nRead with filename: dtfind.ref

INFO in CrefInlist::nRead, EOF after 129 reflections read in  
(129 total now in list).

Command line string: >>-dps<<

Command line string: >>-sigma<<

Command line string: >>-reso<<

Command line string: >>-diffs<<

Command line string: >>-nodeice<<

Command line string: >>-maxresid<<

Command line string: >>-prompt<<

Command line string: >>-nobeamcheck<<

Command line string: >>-out<<

Max cell length allowed for reciprocal lattice vectors: 355.8

...calculating difference vectors...

Method: 1D FFT with DPS algorithm

Out header: output.head

Max cell: 355.8

Num vecs: 1000

Spacegroup: 0

Verbose: 1

Performing 1D FFT indexing (not cell reduction) with the DPS algorithm...see

Steller, Bolotovskiy, & Rossmann (1997) J. Appl. Cryst. 30, 1036–1040.

Max cell is: 355.8

Number of reflections/vectors used: 414

.....

...refining best 30 directions and lengths...

..... done.

Number of vectors used for integer residual calculation: 414

| a      | b      | c      | alpha  | beta   | gamma  | Volume | Remarks | #Indexed | %Residual |
|--------|--------|--------|--------|--------|--------|--------|---------|----------|-----------|
| 73.82  | 103.35 | 31.79  | 90.88  | 90.09  | 44.73  | 170636 | Okay    | 104      | 1.626     |
| 31.79  | 73.82  | 103.35 | 44.73  | 90.88  | 90.09  | 170636 | Okay    | 104      | 1.626     |
| 31.79  | 164.22 | 103.35 | 18.44  | 90.88  | 90.59  | 170636 | Okay    | 104      | 1.626     |
| 164.22 | 103.35 | 31.79  | 90.88  | 90.59  | 18.44  | 170636 | Okay    | 104      | 1.626     |
| 166.92 | 103.33 | 31.78  | 90.86  | 79.59  | 21.54  | 170572 | Okay    | 114      | 2.815     |
| 31.78  | 166.92 | 103.33 | 21.54  | 90.86  | 79.59  | 170572 | Okay    | 114      | 2.815     |
| 73.82  | 107.66 | 31.79  | 73.71  | 90.09  | 47.04  | 170636 | Okay    | 104      | 1.626     |
| 31.79  | 73.82  | 107.66 | 47.04  | 73.71  | 90.09  | 170636 | Okay    | 104      | 1.626     |
| 107.66 | 31.79  | 73.82  | 90.09  | 47.04  | 73.71  | 170636 | Okay    | 104      | 1.626     |
| 164.20 | 107.66 | 31.78  | 73.70  | 90.56  | 24.81  | 170567 | Okay    | 104      | 1.626     |
| 31.78  | 164.20 | 107.66 | 24.81  | 73.70  | 90.56  | 170567 | Okay    | 104      | 1.626     |
| 31.79  | 73.82  | 108.59 | 47.42  | 107.90 | 90.09  | 170636 | Okay    | 104      | 1.626     |
| 73.82  | 108.59 | 31.79  | 107.90 | 90.09  | 47.42  | 170636 | Okay    | 104      | 1.626     |
| 108.59 | 31.79  | 73.82  | 90.09  | 47.42  | 107.90 | 170636 | Okay    | 104      | 1.626     |
| 107.66 | 31.77  | 166.91 | 79.55  | 18.87  | 73.67  | 170499 | Okay    | 114      | 2.795     |
| 31.77  | 166.91 | 107.66 | 18.87  | 73.67  | 79.55  | 170499 | Okay    | 114      | 2.795     |
| 166.91 | 107.66 | 31.77  | 73.67  | 79.55  | 18.87  | 170499 | Okay    | 114      | 2.795     |
| 31.79  | 164.22 | 108.59 | 25.06  | 107.90 | 90.59  | 170636 | Okay    | 104      | 1.626     |
| 108.59 | 31.79  | 164.22 | 90.59  | 25.06  | 107.90 | 170636 | Okay    | 104      | 1.626     |
| 164.22 | 108.59 | 31.79  | 107.90 | 90.59  | 25.06  | 170636 | Okay    | 104      | 1.626     |
| 167.01 | 108.55 | 31.79  | 107.84 | 79.56  | 33.63  | 170585 | Okay    | 104      | 1.664     |
| 108.55 | 31.79  | 167.01 | 79.56  | 33.63  | 107.84 | 170585 | Okay    | 104      | 1.664     |

|        |        |        |       |        |       |        |      |     |       |
|--------|--------|--------|-------|--------|-------|--------|------|-----|-------|
| 31.79  | 167.01 | 108.55 | 33.63 | 107.84 | 79.56 | 170585 | Okay | 104 | 1.664 |
| 73.82  | 103.35 | 107.66 | 17.17 | 47.04  | 44.73 | 170636 | Okay | 104 | 1.626 |
| 164.22 | 103.35 | 107.66 | 17.17 | 24.82  | 18.44 | 170636 | Okay | 104 | 1.626 |
| 108.59 | 103.35 | 73.82  | 44.73 | 47.42  | 17.02 | 170636 | Okay | 104 | 1.626 |
| 73.82  | 108.59 | 103.35 | 17.02 | 44.73  | 47.42 | 170636 | Okay | 104 | 1.626 |
| 108.59 | 103.35 | 164.22 | 18.44 | 25.06  | 17.02 | 170636 | Okay | 104 | 1.626 |
| 108.56 | 103.33 | 166.92 | 21.54 | 33.65  | 17.02 | 170573 | Okay | 114 | 2.815 |
| 73.82  | 120.50 | 31.79  | 59.04 | 90.09  | 52.52 | 170636 | Okay | 104 | 1.626 |
| 31.79  | 73.82  | 120.50 | 52.52 | 59.04  | 90.09 | 170636 | Okay | 104 | 1.626 |
| 120.50 | 31.79  | 73.82  | 90.09 | 52.52  | 59.04 | 170636 | Okay | 104 | 1.626 |
| 120.50 | 31.79  | 164.22 | 90.59 | 36.09  | 59.04 | 170636 | Okay | 104 | 1.626 |
| 31.79  | 164.22 | 120.50 | 36.09 | 59.04  | 90.59 | 170636 | Okay | 104 | 1.626 |
| 164.22 | 120.50 | 31.79  | 59.04 | 90.59  | 36.09 | 170636 | Okay | 104 | 1.626 |
| 31.77  | 166.92 | 120.50 | 26.72 | 59.02  | 79.55 | 170441 | Okay | 114 | 2.785 |
| 166.92 | 120.50 | 31.77  | 59.02 | 79.55  | 26.72 | 170441 | Okay | 114 | 2.785 |
| 120.50 | 31.77  | 166.92 | 79.55 | 26.72  | 59.02 | 170441 | Okay | 114 | 2.785 |
| 31.79  | 73.82  | 164.22 | 26.29 | 90.59  | 90.09 | 170636 | Okay | 104 | 1.626 |
| 73.82  | 164.22 | 31.79  | 90.59 | 90.09  | 26.29 | 170636 | Okay | 104 | 1.626 |
| 164.22 | 31.79  | 73.82  | 90.09 | 26.29  | 90.59 | 170636 | Okay | 104 | 1.626 |
| 166.91 | 31.77  | 73.78  | 90.00 | 28.16  | 79.55 | 170499 | Okay | 104 | 1.625 |
| 31.77  | 73.78  | 166.91 | 28.16 | 79.55  | 90.00 | 170499 | Okay | 104 | 1.625 |
| 73.78  | 166.91 | 31.77  | 79.55 | 90.00  | 28.16 | 170499 | Okay | 104 | 1.625 |
| 166.92 | 73.79  | 103.33 | 44.75 | 21.54  | 28.17 | 170572 | Okay | 104 | 1.626 |
| 164.22 | 107.66 | 73.82  | 47.04 | 26.29  | 24.82 | 170636 | Okay | 104 | 1.626 |
| 73.82  | 164.22 | 107.66 | 24.82 | 47.04  | 26.29 | 170636 | Okay | 104 | 1.626 |
| 108.59 | 164.22 | 73.82  | 26.29 | 47.42  | 25.06 | 170636 | Okay | 104 | 1.626 |
| 164.22 | 73.82  | 108.59 | 47.42 | 25.06  | 26.29 | 170636 | Okay | 104 | 1.626 |
| 166.91 | 120.51 | 73.78  | 52.49 | 28.16  | 26.73 | 170499 | Okay | 104 | 1.625 |

Least square fit to lattice characters... see

Andrews & Bernstein (1988) *Acta Cryst.* A44, 1009–1018 and

Paciorek & Bonin (1992) *J. Appl. Cryst.* 25, 632–637.

.....  
 .....  
 done.

Least-squares fit of reduced primitive cell to 44 lattice characters  
 sorted on decreasing (highest to lowest) symmetry.  
 Only solutions with residuals  $\leq 3.0$  are listed.

| Soln | LeastSq  | Spgrp | Cent | Bravais type | a       | b       | c      |
|------|----------|-------|------|--------------|---------|---------|--------|
| num  | residual | num*  | type | Cell volume  | alpha   | beta    | gamma  |
| 7    | 2.048    | 75    | P    | tetragonal   | 73.277  | 73.277  | 31.777 |
|      |          |       |      | 170623       | 90.000  | 90.000  | 90.000 |
| 9    | 1.898    | 21    | C    | orthorhombic | 103.344 | 103.913 | 31.777 |
|      |          |       |      | 341242       | 90.000  | 90.000  | 90.000 |
| 11   | 1.464    | 16    | P    | orthorhombic | 31.777  | 72.745  | 73.805 |
|      |          |       |      | 170605       | 90.000  | 90.000  | 90.000 |
| 12   | 1.391    | 5     | C    | monoclinic   | 103.392 | 103.102 | 32.955 |
|      |          |       |      | 351294       | 90.000  | 90.321  | 90.000 |
| 12b  | 1.699    | 5     | C    | monoclinic   | 103.344 | 103.913 | 31.777 |
|      |          |       |      | 341242       | 90.000  | 90.000  | 90.000 |
| 13   | 0.725    | 3     | P    | monoclinic   | 31.777  | 73.805  | 72.745 |
|      |          |       |      | 170569       | 90.000  | 91.182  | 90.000 |
| 13b  | 0.770    | 3     | P    | monoclinic   | 31.777  | 73.805  | 72.745 |
|      |          |       |      | 170569       | 90.000  | 91.182  | 90.000 |
| 14   | 0.000    | 1     | P    | triclinic    | 31.777  | 72.745  | 73.805 |

170567    90.314    90.043    91.182

=====

\*Suggested spacegroup number until systematic absences are examined.

To view least-squares fits to other lattices,  
enter a new residual between 17 and 100 at the following prompt.  
Enter solution number of your choice (1-14)  
or new max residual (>=17) or get lattice listing (L)  
<Enter> or <cr> will select the 'P tetragonal' lattice.  
...determining orientation angles...

Unit cell parameters and orientation angles

=====

|     | Integer  | a      | b      | c      |          |        |          |
|-----|----------|--------|--------|--------|----------|--------|----------|
| Num | residual | alpha  | beta   | gamma  | Rot1     | Rot2   | Rot3     |
| 1   | 0.001    | 73.277 | 73.277 | 31.777 | -178.539 | -3.934 | 48.568   |
|     |          | 90.000 | 90.000 | 90.000 |          |        |          |
| 2   | 0.001    | 73.277 | 73.277 | 31.777 | 178.539  | 3.934  | -131.432 |
|     |          | 90.000 | 90.000 | 90.000 |          |        |          |
| 3   | 0.001    | 73.277 | 73.277 | 31.777 | 1.461    | -3.934 | 48.568   |
|     |          | 90.000 | 90.000 | 90.000 |          |        |          |
| 4   | 0.001    | 73.277 | 73.277 | 31.777 | -1.461   | 3.934  | -131.432 |
|     |          | 90.000 | 90.000 | 90.000 |          |        |          |
| 5   | 0.001    | 73.277 | 73.277 | 31.777 | -176.065 | 1.457  | -41.332  |
|     |          | 90.000 | 90.000 | 90.000 |          |        |          |

|   |       |        |        |        |         |        |         |
|---|-------|--------|--------|--------|---------|--------|---------|
| 6 | 0.001 | 73.277 | 73.277 | 31.777 | 176.065 | -1.457 | 138.668 |
|   |       | 90.000 | 90.000 | 90.000 |         |        |         |
| 7 | 0.001 | 73.277 | 73.277 | 31.777 | 3.935   | 1.457  | -41.332 |
|   |       | 90.000 | 90.000 | 90.000 |         |        |         |
| 8 | 0.001 | 73.277 | 73.277 | 31.777 | -3.935  | -1.457 | 138.668 |
|   |       | 90.000 | 90.000 | 90.000 |         |        |         |

=====

The above table shows symmetry EQUIVALENT crystal orientation angles for the indexing orientation. All the solutions are equivalent for the selected Bravais lattice. The default selection usually has the values closest to crystal orientation found in the input .head file or the one where ( $|Rot1| + |Rot2| + |Rot3|$ ) is a minimum.

Enter your choice 0=Abort [7]: Orientation angles choice 1 selected.

Crystal listing:

Unit cell lengths: 73.2767 73.2767 31.7765  
 Unit cell angles: 90.0000 90.0000 90.0000  
 Unit cell volume: 170623.326  
 Orientation angles: -178.5394 -3.9337 48.5679  
 Mosaicity: 0.300  
 Description: unknown

Spacegroup number: 75

name: P4

Num. equiv. posns: 4

dtindex - Wrote header file output.head
