# Supplementary material
Source: MDPI journal article supplement (https://www.mdpi.com/2073-4352/12/2/129)
Supplement: s1 [file s1]

program PKS T. Higashi, 2001 Aug

----- Last update: T Higashi, 2004 Feb

date: Wed Dec 28 18:34:37 2011

#### Control Parameters

frame range: 1-6

spot size in pixels: 9 x 9

threshold of peak height:  $av + 0.50 * sigav$

sigmacut of spot rejection: 3.00

diagnostic level: 0

Filename: C:/B2/suzuki111228\_05/suzuki111228\_05001.img

Scan axis: omega scan range: 0.00 - 1.00

Goniometer angles: 0.00 0.00 0.00

Camera distance: 127.40

#### Checking intensities ...

average intensity: 48 sigma intensity: 45

threshold of peak height: 70

intensity: maximum: 16383 (1.56% saturation) minimum: 7

#### Searching peaks ...

594 spots are picked

estimated spot radii: 13 11

estimated spotsize: 27 23

#### Checking intensities ...

average intensity: 48 sigma intensity: 45

threshold of peak height: 70

intensity: maximum: 16383 (1.56% saturation) minimum: 7

#### Searching peaks ...

688 spots are picked

Filename: C:/B2/suzuki111228\_05/suzuki111228\_05002. img

Scan axis: omega scan range: 1.00 – 2.00

Goniometer angles: 0.00 0.00 1.00

Camera distance: 127.40

Checking intensities ...

average intensity: 48 sigma intensity: 66

threshold of peak height: 81

intensity: maximum: 34016 (3.24% saturation) minimum: 7

Searching peaks ...

564 spots are picked

Filename: C:/B2/suzuki111228\_05/suzuki111228\_05003. img

Scan axis: omega scan range: 45.00 – 46.00

Goniometer angles: 0.00 0.00 45.00

Camera distance: 127.40

Checking intensities ...

average intensity: 50 sigma intensity: 37

threshold of peak height: 68

intensity: maximum: 2722 (0.26% saturation) minimum: 7

Searching peaks ...

610 spots are picked

Filename: C:/B2/suzuki111228\_05/suzuki111228\_05004. img

Scan axis: omega scan range: 46.00 – 47.00

Goniometer angles: 0.00 0.00 46.00

Camera distance: 127.40

Checking intensities ...

average intensity: 50      sigma intensity: 47

threshold of peak height: 73

intensity: maximum: 10098 (0.96% saturation)      minimum: 7

Searching peaks ...

611 spots are picked

Filename: C:/B2/suzuki111228\_05/suzuki111228\_05005. img

Scan axis: omega   scan range: 90.00 – 91.00

Goniometer angles: 0.00 0.00 90.00

Camera distance: 127.40

Checking intensities ...

average intensity: 40      sigma intensity: 45

threshold of peak height: 63

intensity: maximum: 7852 (0.75% saturation)      minimum: 7

Searching peaks ...

775 spots are picked

Filename: C:/B2/suzuki111228\_05/suzuki111228\_05006. img

Scan axis: omega   scan range: 91.00 – 92.00

Goniometer angles: 0.00 0.00 91.00

Camera distance: 127.40

Checking intensities ...

average intensity: 40      sigma intensity: 65

threshold of peak height: 73

intensity: maximum: 16480 (1.57% saturation)      minimum: 7

Searching peaks ...

648 spots are picked

3896 total spots picked

fftindex      T. Higashi      1999/Jun/15  
-----      Last update:      2004/Dec TH

date: Wed Dec 28 18:34:40 2011

peak file: peaks.dat

number of peaks to be used: 1000

cell length range: dmin = 3.0 Å, dmax = 200.0 Å

LSQ model: tight

tolerance for integral indices = 0.3

angle      tolerance in LSQ = 1.0 deg

distance tolerance in LSQ = 2.0 mm

LS cycles = 5

eigenvalue filtering factor = 1.000000e-006

| fft parameters | power | step     | terms | grid size | range    |
|----------------|-------|----------|-------|-----------|----------|
| first pass:    | 10    | 3.00 deg | 1024  | 0.391 Å   | –        |
| second pass:   | 11    | 0.20 deg | 2048  | 0.195 Å   | 3.00 deg |

where terms =  $2^{\text{power}}$  and grid size =  $d_{\text{max}} / (2-1)^{\text{power}}$

2theta max: 180.00

powder treshold: 0

pseudo translation test: off

twin domain ID: 0

cell reduction tolerances:

accepted deviation of cell lengths = 0.60 Å

accepted deviation of cell angles = 1.20 deg

accepted deviation of metric tensor coeffs. = 0.80

local bin parameters:

local bin size = 30.00 deg  
primary bins = 6  
total bins = 28

Peak file: peaks.dat

frame template: C:/B2/suzuki111228\_05/suzuki111228\_05###.img

number frames: 6

peak selection:

2-theta limit = 180.0 deg; rejected: 0

powder peak threshold = 0; rejected: 0

peaks read = 3896

peaks to be used = 1000

FIRST PASS

SECOND PASS

Selected Real-Space Vectors

| No | d (Å)  | x       | y       | z      | FOM   |
|----|--------|---------|---------|--------|-------|
| 1  | 38.09  | -0.7888 | 0.4915  | 0.3690 | 95.90 |
| 2  | 88.09  | -0.6234 | -0.5441 | 0.5615 | 83.68 |
| 3  | 88.09  | 0.8161  | 0.0010  | 0.5779 | 81.49 |
| 4  | 110.16 | -0.7726 | -0.2653 | 0.5768 | 75.27 |
| 5  | 118.75 | 0.3963  | -0.5615 | 0.7264 | 69.78 |
| 6  | 118.75 | -0.1120 | -0.2454 | 0.9629 | 69.71 |
| 7  | 160.35 | -0.4581 | 0.0512  | 0.8874 | 51.63 |
| 8  | 163.48 | 0.3270  | 0.3464  | 0.8793 | 50.67 |
| 9  | 171.88 | -0.8454 | 0.0475  | 0.5320 | 46.84 |
| 10 | 171.88 | 0.9445  | -0.3244 | 0.0514 | 46.47 |
| 11 | 181.84 | 0.1562  | -0.0569 | 0.9861 | 44.77 |
| 12 | 5.47   | 0.9990  | -0.0064 | 0.0440 | 29.82 |

|    |        |         |         |        |       |
|----|--------|---------|---------|--------|-------|
| 13 | 5.08   | 0.0497  | 0.9957  | 0.0784 | 24.42 |
| 14 | 145.90 | 0.4723  | 0.5583  | 0.6821 | 22.93 |
| 15 | 2.73   | 0.0680  | -0.9922 | 0.1043 | 22.78 |
| 16 | 2.73   | -0.3013 | 0.5605  | 0.7714 | 17.21 |
| 17 | 116.41 | 0.1772  | -0.4936 | 0.8515 | 15.45 |

## REFINEMENT

key integers: 111111111110000000

number of parameters: 18

number of variables: 11

## Cell Candidates

| No |   | a       | b       | c       | alpha  | beta   | gamma  | volume  | acc(%)  |
|----|---|---------|---------|---------|--------|--------|--------|---------|---------|
| 1  | P | 79.448  | 79.481  | 38.088  | 90.03  | 90.01  | 90.04  | 240506  | 95.8 45 |
| 2  | C | 76.183  | 158.931 | 79.459  | 90.04  | 90.05  | 90.00  | 962079  | 94.3 21 |
| 3  | C | 135.772 | 112.419 | 118.615 | 90.02  | 127.14 | 89.97  | 1443298 | 94.0 14 |
| 4  | P | 88.145  | 79.466  | 110.030 | 90.02  | 110.58 | 89.97  | 721539  | 95.6 9  |
| 5  | P | 88.126  | 110.084 | 110.127 | 118.61 | 107.44 | 110.60 | 721594  | 95.4 8  |
| 6  | P | 88.125  | 110.128 | 135.751 | 88.03  | 73.39  | 72.56  | 1202586 | 94.8 2  |
| 9  | P | 110.097 | 118.670 | 135.775 | 79.63  | 88.08  | 74.82  | 1683924 | 93.6 3  |
| 12 | C | 38.062  | 79.467  | 79.454  | 90.06  | 90.09  | 89.99  | 240319  | 93.3 2  |
| 13 | P | 118.667 | 135.707 | 139.242 | 97.27  | 96.85  | 100.35 | 2164825 | 94.0 1  |
| 14 | P | 110.071 | 79.494  | 139.125 | 90.05  | 98.99  | 90.00  | 1202400 | 93.6 1  |
| 16 | P | 110.125 | 135.750 | 160.217 | 113.56 | 97.82  | 91.97  | 2164702 | 91.9 2  |
| 17 | P | 118.669 | 135.706 | 171.909 | 103.11 | 91.47  | 100.35 | 2646058 | 92.2 1  |
| 18 | C | 324.783 | 112.415 | 118.594 | 90.04  | 91.55  | 89.98  | 4328365 | 90.4 2  |
| 19 | C | 189.469 | 112.339 | 118.680 | 90.00  | 107.73 | 90.02  | 2406095 | 89.9 1  |

cell: 79.448 79.481 38.088 90.03 90.01 90.04

lattice type: P, rotation and x-ray axes: +a\* -c

phixyz: -28.604876 21.558185 -31.803130

## Check Pseudo Translation

pseudo translation axis:  $0.50a^* + 0.00b^* + 0.17c^*$

is implied by 2 peaks of 5 unindexed peaks
