# Supplementary material
Source: MDPI journal article supplement (https://www.mdpi.com/2073-4352/12/2/129)
Supplement: s1 [file s1]

```
<!-- CCP4 HTML LOGFILE -->
<pre>#CCP4I VERSION CCP4Interface 7.1.009
#CCP4I SCRIPT LOG aimless
#CCP4I DATE 25 Oct 2021 11:50:52
#CCP4I USER yoshihisasuzuki
#CCP4I PROJECT merge_roomtemp_GI_pf
#CCP4I JOB_ID 7
#CCP4I SCRATCH /tmp/yoshihisasuzuki
#CCP4I HOSTNAME YoshihisanoMacBook-Air.local
#CCP4I PID 36583
</pre>
```

```
#####
#####
#####
### CCP4 7.1.009: POINTLESS          version 1.12.2 : 24/06/20##
#####
User: yoshihisasuzuki  Run date: 25/10/2021 Run time: 11:50:52
```

Please reference: Collaborative Computational Project, Number 4. 2011.  
"Overview of the CCP4 suite and current developments". Acta Cryst. D67, 235-242.  
as well as any specific reference in the program write-up.

==== Command line arguments ====

HKLOUT /tmp/yoshihisasuzuki/merge\_roomtemp\_GI\_pf\_7\_2\_mtz.tmp

XMLOUT

/Users/yoshihisasuzuki/Documents/JCCG50/merge\_roomtemp\_GI\_pf/merge\_roomtemp\_GI\_pf\_7\_po  
intless.xml

Release Date: 24th June 2020

==== Input command lines ====

```
HKLIN                               /Users/yoshihisasuzuki/Documents/211008suzuki01-
collection3/collection3_pointless1.mtz
HKLIN /Users/yoshihisasuzuki/Documents/211008suzuki03/collection_pointless1.mtz
## This script run with the command #####
#                               /Applications/ccp4-7.1/bin/pointless           HKLOUT
"/tmp/yoshihisasuzuki/merge_roomtemp_GI_pf_7_2_mtz.tmp" XMLOUT &
"/Users/yoshihisasuzuki/Documents/JCCG50/merge_roomtemp_GI_pf/merge_roomtemp_GI_pf_7_p
ointless.xml"
#####
```

==== End of input ====

```
*****
*                                     *
*                                POINTLESS                                *
*                                1. 12. 2                                *
*                                     *
*  Determine Laue group from unmerged intensities                       *
*    Phil Evans MRC LMB, Cambridge                                       *
*  Uses cctbx routines by Ralf Grosse-Kunstleve et al.*
*                                     *
*****
```

Reflection list generated from file: /Users/yoshihisasuzuki/Documents/211008suzuki01-  
collection3/collection3\_pointless1.mtz

Title: Untitled

Space group from HKLIN file : I 2 2 2

Cell: 94.08 99.32 103.13 90.00 90.00 90.00

Resolution range in file: 41.15 1.14

Reflection list generated from file:  
/Users/yoshihisasuzuki/Documents/211008suzuki03/collection\_pointless1.mtz

Title: Untitled

Space group from HKLIN file : I 2 2 2

Cell: 94.06 99.38 103.14 90.00 90.00 90.00

Resolution range in file: 41.16 1.14

Batch numbers incremented by 1000

| ResolutionRange | NobsParts | Nbatches | Ndatasets |
|-----------------|-----------|----------|-----------|
| 41.16 1.14      | 593774    | 146      | 1         |

Project: New Crystal: New Dataset: New

No possible alternative indexing

Time for reading file(s): 2.964 secs

=====  
>\*> Summary of test data read in:

Resolution range accepted: 41.16 1.14

Number of reflections = 175530

Number of observations = 1072448

Number of parts = 1277349

Number of batches in file = 326

Number of datasets = 1

Project: New Crystal: New Dataset: New

Run number: 1 consists of batches 1 – 180

Resolution range for run: 41.15 1.14

Phi range: -45.00 to 45.00 Time range: -45.00 to 45.00

Closest reciprocal axis to spindle: b\* (angle 19.6 degrees)

Run number: 2 consists of batches 1035 – 1180

Resolution range for run: 41.15 1.14

Phi range: -28.00 to 45.00 Time range: -28.00 to 45.00

Closest reciprocal axis to spindle: c\* (angle 33.6 degrees)

Dataset contains multiple unit cells and wavelengths

'deviation' is estimate of the difference of the cell (in Å)  
from the mean of the others

At worst this should be less than half the maximum resolution of the data

|                       | a        | b       | c      | alpha | beta  | gamma | deviation   |
|-----------------------|----------|---------|--------|-------|-------|-------|-------------|
| lambda                |          |         |        |       |       |       |             |
|                       | 94.08    | 99.32   | 103.13 | 90.00 | 90.00 | 90.00 | 0.06 0.9000 |
|                       | 94.06    | 99.38   | 103.14 | 90.00 | 90.00 | 90.00 | 0.06 0.9000 |
| RMS deviation:        | 0.01     | 0.04    | 0.01   | 0.00  | 0.00  | 0.00  |             |
| Average dataset cell: | 94.07    | 99.35   | 103.13 | 90.00 | 90.00 | 90.00 |             |
| Wavelengths:          | 0.89999, | 0.89999 |        |       |       |       |             |

Numbers of observations marked in the FLAG column

By default all flagged observations are rejected

Observations may be counted in more than one category

|                    | Flagged | Accepted | Maximum | MaxAccepted |
|--------------------|---------|----------|---------|-------------|
| BGratio too large  | 0       | 0        | 1.600   | 0.000       |
| PKratio too large  | 68457   | 0        | 148.040 | 0.000       |
| Negative < 5sigma  | 0       | 0        |         |             |
| Gradient too large | 0       | 0        | 0.335   | 0.000       |

|                          |       |     |
|--------------------------|-------|-----|
| Profile-fitted overloads | 300   | 300 |
| Spots on edge            | 22183 | 0   |
| XDS misfits (outliers)   | 0     | 0   |

=====

No alternative indexing to test

|                                 |         |
|---------------------------------|---------|
| Number of reflections =         | 175530  |
| Number of observations =        | 1072448 |
| Number of scaled observations = | 813     |
| Average multiplicity =          | 6.1     |

Resolution range in list: 41.16 -> 1.14

Intensity normalisation for each run:

|                   |                                      |
|-------------------|--------------------------------------|
| Run 1: B-factor = | -8.3 + -0.0092 * time (final B -9.1) |
| Run 2: B-factor = | -8.8 + -0.0119 * time (final B -9.7) |

Estimation of useful resolution for point group determination:

-----

Point group correlation statistics are not reliable for very weak data, so a high resolution cutoff (for this purpose only) is estimated either from CC(1/2) using P1 (Friedel) symmetry (limit 0.60), or from Mean(I/sigma(I)) (limit 6.00), if there are sufficient data

|                                           |      |
|-------------------------------------------|------|
| High-resolution estimate from CC(1/2):    | 1.56 |
| High-resolution estimate from <I/sig(I)>: | 1.92 |

High resolution limit reset to 1.56 using CC(1/2) cutoff (in P1)

\$TABLE: Mn(I/sigI) and CC(1/2) [in P1] vs. resolution:

\$GRAPHS:Resolution estimate 1.56A:0.000590296|0.772176x0|1:2, 4, 6, 7, 9:

\$\$

| N  | 1/d <sup>2</sup> | Dmid | CC(1/2) | N_CC  | CCfit | Mn(I/sigI) | N (I/sigI)/10 | \$\$ \$\$ |
|----|------------------|------|---------|-------|-------|------------|---------------|-----------|
| 1  | 0.0135           | 8.62 | 0.521   | 312   | 0.999 | 81.91      | 1421          | 8.191     |
| 2  | 0.0392           | 5.05 | 0.917   | 541   | 0.999 | 65.78      | 2691          | 6.578     |
| 3  | 0.0649           | 3.93 | 0.967   | 466   | 0.998 | 57.96      | 2189          | 5.796     |
| 4  | 0.0906           | 3.32 | 0.983   | 959   | 0.997 | 31.08      | 4388          | 3.108     |
| 5  | 0.1163           | 2.93 | 0.973   | 2373  | 0.995 | 20.40      | 8806          | 2.040     |
| 6  | 0.1420           | 2.65 | 0.972   | 3520  | 0.993 | 15.06      | 11376         | 1.506     |
| 7  | 0.1678           | 2.44 | 0.961   | 5885  | 0.989 | 13.25      | 18399         | 1.325     |
| 8  | 0.1935           | 2.27 | 0.951   | 5939  | 0.983 | 11.82      | 18038         | 1.182     |
| 9  | 0.2192           | 2.14 | 0.951   | 7690  | 0.975 | 10.03      | 22756         | 1.003     |
| 10 | 0.2449           | 2.02 | 0.939   | 9310  | 0.961 | 7.83       | 27262         | 0.783     |
| 11 | 0.2706           | 1.92 | 0.928   | 4370  | 0.941 | 6.21       | 12744         | 0.621     |
| 12 | 0.2964           | 1.84 | 0.895   | 8981  | 0.911 | 4.45       | 27901         | 0.445     |
| 13 | 0.3221           | 1.76 | 0.866   | 8524  | 0.869 | 3.72       | 26001         | 0.372     |
| 14 | 0.3478           | 1.70 | 0.817   | 8846  | 0.811 | 2.83       | 24930         | 0.283     |
| 15 | 0.3735           | 1.64 | 0.748   | 11332 | 0.735 | 2.37       | 30294         | 0.237     |
| 16 | 0.3992           | 1.58 | 0.646   | 12208 | 0.641 | 1.93       | 30947         | 0.193     |
| 17 | 0.4250           | 1.53 | 0.549   | 12738 | 0.535 | 1.64       | 31085         | 0.164     |
| 18 | 0.4507           | 1.49 | 0.459   | 13195 | 0.427 | 1.41       | 31155         | 0.141     |
| 19 | 0.4764           | 1.45 | 0.315   | 13677 | 0.324 | 1.22       | 30210         | 0.122     |
| 20 | 0.5021           | 1.41 | 0.208   | 14228 | 0.237 | 1.09       | 29846         | 0.109     |
| 21 | 0.5278           | 1.38 | 0.154   | 14356 | 0.167 | 1.03       | 29078         | 0.103     |
| 22 | 0.5536           | 1.34 | 0.094   | 12830 | 0.114 | 0.97       | 26526         | 0.097     |
| 23 | 0.5793           | 1.31 | 0.070   | 12693 | 0.077 | 0.94       | 25665         | 0.094     |
| 24 | 0.6050           | 1.29 | 0.044   | 13253 | 0.051 | 0.88       | 25978         | 0.088     |
| 25 | 0.6307           | 1.26 | 0.045   | 14320 | 0.034 | 0.86       | 27124         | 0.086     |
| 26 | 0.6564           | 1.23 | 0.034   | 15095 | 0.022 | 0.83       | 27507         | 0.083     |
| 27 | 0.6822           | 1.21 | 0.019   | 15881 | 0.014 | 0.80       | 28390         | 0.080     |
| 28 | 0.7079           | 1.19 | 0.031   | 16250 | 0.009 | 0.78       | 28647         | 0.078     |
| 29 | 0.7336           | 1.17 | 0.015   | 16465 | 0.006 | 0.77       | 29237         | 0.077     |

30 0.7593 1.15 0.011 16745 0.004 0.74 29169 0.074  
 \$\$

Checking for possible twinning

L-test for twinning (acentrics only) to maximum resolution 1.563

Neighbouring reflections for test are  $\pm 2$  on h,k,l

\$TABLE: L-test for twinning, twin fraction 0.052:

\$GRAPHS: Cumulative distribution of  $|L|$ , estimated fraction 0.052: N:1,2,3,4:

\$\$

| $ L $  | N( $ L $ ) | Untwinned | Twinned | \$\$ \$\$ |
|--------|------------|-----------|---------|-----------|
| 0.0000 | 0.0000     | 0.0000    | 0.0000  |           |
| 0.0500 | 0.0568     | 0.0500    | 0.0749  |           |
| 0.1000 | 0.1127     | 0.1000    | 0.1495  |           |
| 0.1500 | 0.1686     | 0.1500    | 0.2233  |           |
| 0.2000 | 0.2243     | 0.2000    | 0.2960  |           |
| 0.2500 | 0.2797     | 0.2500    | 0.3672  |           |
| 0.3000 | 0.3345     | 0.3000    | 0.4365  |           |
| 0.3500 | 0.3897     | 0.3500    | 0.5036  |           |
| 0.4000 | 0.4439     | 0.4000    | 0.5680  |           |
| 0.4500 | 0.4977     | 0.4500    | 0.6294  |           |
| 0.5000 | 0.5508     | 0.5000    | 0.6875  |           |
| 0.5500 | 0.6033     | 0.5500    | 0.7418  |           |
| 0.6000 | 0.6549     | 0.6000    | 0.7920  |           |
| 0.6500 | 0.7051     | 0.6500    | 0.8377  |           |
| 0.7000 | 0.7549     | 0.7000    | 0.8785  |           |
| 0.7500 | 0.8030     | 0.7500    | 0.9141  |           |
| 0.8000 | 0.8496     | 0.8000    | 0.9440  |           |
| 0.8500 | 0.8943     | 0.8500    | 0.9679  |           |
| 0.9000 | 0.9362     | 0.9000    | 0.9855  |           |
| 0.9500 | 0.9736     | 0.9500    | 0.9963  |           |
| 1.0000 | 1.0000     | 1.0000    | 1.0000  |           |

\$\$

Estimated twin fraction alpha from cumulative N(|L|) plot 0.057 (+/-0.007)  
 < |L| >: 0.463 (0.5 untwinned, 0.375 perfect twin)  
 Estimated twin fraction alpha from < |L| > 0.052  
 < L^2 >: 0.292 (0.333 untwinned, 0.2 perfect twin)  
 Estimated twin fraction alpha from < L^2 > 0.048

The L-test suggests that the data are not twinned

Note that the estimate of the twin fraction from the L-test is not very accurate,  
 particularly for high twin fractions. Better estimates from other tests need knowledge  
 of

the point group and the twin operator, which are not available here  
 Also these statistics come from possibly unscaled (and unmerged) data,  
 so may be inaccurate for that reason

Time for twinning test 4.973 secs

=====

Model for expectation(CC) = E(m) if symmetry is absent  $P(m;!S) = (1-m^k)^{1/k}$  with k =  
 2.6

Lattice symmetry == HKLIN symmetry

Unit cell (from HKLIN file) used to derive lattice symmetry with tolerance 2.0 degrees  
 94.08 99.32 103.13 90.00 90.00 90.00

Tolerance (and delta) is the maximum deviation from the  
 expected angle between two-fold axes in the lattice group

Lattice point group: I 2 2 2

1 pairs rejected for E^2 too large

Overall CC for 20000 unrelated pairs: -0.002 N= 20000, high resolution limit 1.56

Estimated expectation value of true correlation coefficient  $E(CC) = 0.723$

Estimated  $sd(CC) = 1.068 / \sqrt{N}$

Number of reflections omitted from ice rings: 1226

Estimated  $E(CC)$  of true correlation coefficient from identity = 0.819

\*\*\*\*\*

Analysing rotational symmetry in lattice group I m m m

-----

<!--SUMMARY\_BEGIN-->

Scores for each symmetry element

| Nelmt | Lklhd | Z-cc | CC   | N      | Rmeas | Symmetry & operator (in Lattice Cell) |
|-------|-------|------|------|--------|-------|---------------------------------------|
| 1     | 0.920 | 8.61 | 0.86 | 195013 | 0.192 | identity                              |
| 2     | 0.911 | 8.10 | 0.81 | 173653 | 0.226 | *** 2-fold l ( 0 0 1) {-h, -k, l}     |
| 3     | 0.919 | 8.64 | 0.86 | 309161 | 0.195 | *** 2-fold k ( 0 1 0) {-h, k, -l}     |
| 4     | 0.906 | 8.05 | 0.81 | 176640 | 0.229 | *** 2-fold h ( 1 0 0) {h, -k, -l}     |

<!--SUMMARY\_END-->

Time to determine pointgroup: 7.344 secs

Acceptable Laue groups have scores above 0.19

Scores for all possible Laue groups which are sub-groups of lattice group

---

Note that correlation coefficients are from intensities approximately normalised by resolution, so will be worse than the usual values

Rmeas is the multiplicity weighted R-factor

Lklhd is a likelihood measure, a probability used in the ranking of space groups

Z-scores are from combined scores for all symmetry elements in the sub-group (Z+) or not in sub-group (Z-)

$$\text{NetZ} = Z+ - Z-$$

Net Z-scores are calculated for correlation coefficients (cc)

The point-group Z-scores Zc are calculated

as the Zcc-scores recalculated for all symmetry elements for or against,

CC- and R- are the correlation coefficients and R-factors for symmetry elements not in the group

Delta is maximum angular difference (degrees) between original cell and cell with symmetry constraints imposed

The reindex operator converts original index scheme into the conventional scheme for sub-group

Accepted Laue groups are marked '>'

The HKLIN Laue group is marked '=' if accepted, '-' if rejected

<!--SUMMARY\_BEGIN-->

|                 | Laue Group  | Lklhd | NetZc | Zc+  | Zc-  | CC   | CC-  | Rmeas | R-   | Delta                                                 |
|-----------------|-------------|-------|-------|------|------|------|------|-------|------|-------------------------------------------------------|
| ReindexOperator |             |       |       |      |      |      |      |       |      |                                                       |
| = 1             | I m m m *** | 0.972 | 8.39  | 8.39 | 0.00 | 0.84 | 0.00 | 0.21  | 0.00 | 0.0 [h, k, l]                                         |
| 2               | I 1 2/m 1   | 0.010 | 0.56  | 8.62 | 8.06 | 0.86 | 0.81 | 0.19  | 0.23 | 0.0 [-h, -k, l]                                       |
| 3               | I 1 2/m 1   | 0.009 | -0.01 | 8.39 | 8.40 | 0.84 | 0.84 | 0.21  | 0.21 | 0.0 [h, l, -k]                                        |
| 4               | I 1 2/m 1   | 0.008 | -0.09 | 8.35 | 8.43 | 0.83 | 0.84 | 0.21  | 0.21 | 0.0 [k, -h, l]                                        |
| 5               | P -1        | 0.001 | 0.29  | 8.61 | 8.32 | 0.86 | 0.83 | 0.19  | 0.21 | 0.0 [1/2h+1/2k+1/2l, 1/2h-1/2k-1/2l, -1/2h+1/2k-1/2l] |

<!--SUMMARY\_END-->

\*\*\*\*\*

Testing Lauegroups for systematic absences

No systematic absence zones to test in this lattice group

Time for systematic absence tests: 0.103 secs

Possible spacegroups:

Indistinguishable space groups are grouped together on successive lines

'Reindex' is the operator to convert from the input hklin frame to the standard spacegroup frame.

'TotProb' is a total probability estimate (unnormalised)

'SysAbsProb' is an estimate of the probability of the space group based on the observed systematic absences.

'Conditions' are the reflection conditions (absences)

| Spacegroup       | TotProb | SysAbsProb | Reindex | Conditions |
|------------------|---------|------------|---------|------------|
| I 2 2 2 ( 23)    | 0.972   | 1.000      |         |            |
| I 21 21 21 ( 24) | 0.972   | 1.000      |         |            |

---

Choosing between possible best groups:

| Space group | Point group | Reindex   |
|-------------|-------------|-----------|
| I 2 2 2     | I 2 2 2     | [h, k, l] |
| I 21 21 21  | I 2 2 2     | [h, k, l] |

Space group confidence (= Sqrt(Score \* (Score - NextBestScore))) = 0.00

Laue group confidence (= Sqrt(Score \* (Score - NextBestScore))) = 0.97

Selecting point group I 2 2 2 as multiple space groups have the same score

WARNING: You will have to determine the true space group later

The 'space group' written to output file may be missing possible screw components

<!--SUMMARY\_BEGIN--> \$TEXT:Result: \$\$ \$\$

Best Solution: point group I 2 2 2

|                                 |           |
|---------------------------------|-----------|
| Reindex operator:               | [h, k, l] |
| Laue group probability:         | 0.972     |
| Systematic absence probability: | 1.000     |
| Total probability:              | 0.972     |
| Space group confidence:         | 0.000     |
| Laue group confidence           | 0.967     |

WARNING: You will have to determine the true space group later

The 'space group' written to output file may be missing possible screw components

Unit cell:    94.08   99.32 103.13       90.00   90.00   90.00

41.16 to   1.56   - Resolution range used for Laue group search

41.16 to   1.14   - Resolution range in file, used for systematic absence check

Number of batches in file:    326

The data do not appear to be twinned, from the L-test

\$\$ <!--SUMMARY\_END-->

HKLIN spacegroup: I 2 2 2   body-centred orthorhombic

^^^^^^^^^^^^^^^^^^^^^^^^^^^^^^^^^^^^^^^^^^^^^^^^^^^^^^^^^^^^

Final point group choice has alternative indexing possibilities

Alternative indexing possibilities are marked '\*' if the cells are  
too different at the maximum resolution

CellDifference(A) ReindexOperator

|   |       |            |
|---|-------|------------|
| 1 | 0.0   | [h, k, l]  |
| 2 | 5.1 * | [-h, l, k] |

Writing unmerged data to file /tmp/yoshihisasuzuki/merge\_roomtemp\_GI\_pf\_7\_2\_mtz.tmp in  
point group I 2 2 2

Reindexing operator [h, k, l]

Real space transformation (x, y, z)

\* Title:

Untitled

\* Base dataset:

0 HKL\_base  
HKL\_base  
HKL\_base

\* Number of Datasets = 1

\* Dataset ID, project/crystal/dataset names, cell dimensions, wavelength:

|   |     |         |         |          |         |         |
|---|-----|---------|---------|----------|---------|---------|
| 1 | New |         |         |          |         |         |
|   | New |         |         |          |         |         |
|   | New |         |         |          |         |         |
|   |     | 94.0700 | 99.3500 | 103.1350 | 90.0000 | 90.0000 |
|   |     | 0.89999 |         |          |         |         |

\* Number of Columns = 18

\* Number of Reflections = 1277349

\* Missing value set to NaN in input mtz file

\* Number of Batches = 326

\* Column Labels :

H K L M/ISYM BATCH I SIGI IPR SIGIPR FRACTIONCALC XDET YDET ROT WIDTH LP MPART FLAG  
BGPKRATIOS

\* Column Types :

H H H Y B J Q J Q R R R R R I I R

\* Associated datasets :

0 0 0 0 0 0 0 0 0 0 0 0 0 0 0 0

\* Cell Dimensions : (obsolete – refer to dataset cell dimensions above)

94.0800 99.3200 103.1300 90.0000 90.0000 90.0000

\* Resolution Range :

0.00059 0.77301 ( 41.156 – 1.137 Å )

\* Sort Order :

1 2 3 4 5

\* Space group = 'I 2 2 2' (number 23)

(only pointgroup is fixed so far)

\$TEXT:Reference: \$\$ Please cite \$\$

P.R.Evans, 'Scaling and assessment of data quality' Acta Cryst. D62, 72-82 (2006).

<http://journals.iucr.org/d/issues/2006/01/00/ba5084/index.html>

**PDF**

P.R.Evans, 'An introduction to data reduction: space-group determination, scaling and intensity statistics' Acta Cryst. D67, 282-292 (2011)

<http://journals.iucr.org/d/issues/2011/04/00/ba5158/index.html>

**PDF**

\$\$

```
#####
#####
#####
### CCP4 7.1.009: AIMLESS          version 0.7.4 : 13/12/18##
#####
User: yoshihisasuzuki  Run date: 25/10/2021 Run time: 11:51:05
```

Please reference: Collaborative Computational Project, Number 4. 2011.  
"Overview of the CCP4 suite and current developments". Acta Cryst. D67, 235-242.  
as well as any specific reference in the program write-up.

==== Command line arguments ====

HKLIN /tmp/yoshihisasuzuki/merge\_roomtemp\_GI\_pf\_7\_2\_mtz.tmp

HKLOUT /tmp/yoshihisasuzuki/merge\_roomtemp\_GI\_pf\_7\_3\_mtz.tmp

SCALES

/Users/yoshihisasuzuki/Documents/JCCG50/merge\_roomtemp\_GI\_pf/merge\_roomtemp\_GI\_pf\_7.scales

ROGUES

/Users/yoshihisasuzuki/Documents/JCCG50/merge\_roomtemp\_GI\_pf/merge\_roomtemp\_GI\_pf\_7\_rogues.log

NORMPLOT

/Users/yoshihisasuzuki/Documents/JCCG50/merge\_roomtemp\_GI\_pf/merge\_roomtemp\_GI\_pf\_7\_normplot.xmgr

ANOMPLOT

/Users/yoshihisasuzuki/Documents/JCCG50/merge\_roomtemp\_GI\_pf/merge\_roomtemp\_GI\_pf\_7\_anomplot.xmgr

CORREL PLOT

/Users/yoshihisasuzuki/Documents/JCCG50/merge\_roomtemp\_GI\_pf/merge\_roomtemp\_GI\_pf\_7\_correlplot.xmgr

ROGUEPLOT

/Users/yoshihisasuzuki/Documents/JCCG50/merge\_roomtemp\_GI\_pf/merge\_roomtemp\_GI\_pf\_7\_rogueplot.xmgr

XMLOUT

/Users/yoshihisasuzuki/Documents/JCCG50/merge\_roomtemp\_GI\_pf/merge\_roomtemp\_GI\_pf\_7\_aimless.xml

Release Date: 13th December 2018

==== Input command lines ====

title [No title given]

resolution &

low 41.159 &

high 1.46

output &

mtz MERGED

## This script run with the command #####

# /Applications/ccp4-7.1/bin/aimless HKLIN

"/tmp/yoshihisasuzuki/merge\_roomtemp\_GI\_pf\_7\_2\_mtz.tmp" HKLOUT

"/tmp/yoshihisasuzuki/merge\_roomtemp\_GI\_pf\_7\_3\_mtz.tmp" SCALES

"/Users/yoshihisasuzuki/Documents/JCCG50/merge\_roomtemp\_GI\_pf/merge\_roomtemp\_GI\_pf\_7.s

```

cales"
"/Users/yoshihisasuzuki/Documents/JCCG50/merge_roomtemp_GI_pf/merge_roomtemp_GI_pf_7_r
ogues.log"
"/Users/yoshihisasuzuki/Documents/JCCG50/merge_roomtemp_GI_pf/merge_roomtemp_GI_pf_7_n
ormplot.xmgr"
"/Users/yoshihisasuzuki/Documents/JCCG50/merge_roomtemp_GI_pf/merge_roomtemp_GI_pf_7_a
nomplot.xmgr" CORREL PLOT &
"/Users/yoshihisasuzuki/Documents/JCCG50/merge_roomtemp_GI_pf/merge_roomtemp_GI_pf_7_c
orrelplot.xmgr"
"/Users/yoshihisasuzuki/Documents/JCCG50/merge_roomtemp_GI_pf/merge_roomtemp_GI_pf_7_r
ogueplot.xmgr"
"/Users/yoshihisasuzuki/Documents/JCCG50/merge_roomtemp_GI_pf/merge_roomtemp_GI_pf_7_a
imless.xml"

```

```
#####
```

```
==== End of input =====
```

```

*****
*
*
*          AIMLESS
*          0.7.4
*
*
*   Scaling & analysis of unmerged intensities
*   Phil Evans MRC LMB, Cambridge
*
*****

```

---

Reading data from HKLIN filename: /tmp/yoshihisasuzuki/merge\_roomtemp\_GI\_pf\_7\_2\_mtz.tmp

Reflection list generated from file:  
/tmp/yoshihisasuzuki/merge\_roomtemp\_GI\_pf\_7\_2\_mtz. tmp

Title: Untitled

Space group from HKLIN file : I 2 2 2

Cell: 94.07 99.35 103.14 90.00 90.00 90.00

Resolution range in file: 41.16 1.14

Number of observation parts outside resolution limits = 662891

Time for reading HKLIN: cpu time: 1.44 secs, elapsed time: 2.0 secs

Resolution range accepted: 41.16 1.46

Number of reflections = 83670

Number of observations = 516484

Number of parts = 614458

Number of batches = 326

Number of datasets = 1

\* Dataset information \*

Project: New Crystal: New Dataset: New

Unit cell: 94.07 99.35 103.13 90.00 90.00 90.00

Wavelength: 0.89999

Runs: 1 2

Run number: 1 consists of batches 1 - 180

Resolution range for run: 41.16 1.46

Phi range: -45.00 to 45.00 Time range: -45.00 to 45.00

Closest reciprocal axis to spindle: b\* (angle 19.6 degrees)

Run number: 2 consists of batches 1035 - 1180

Resolution range for run: 41.16 1.46

Phi range: -28.00 to 45.00 Time range: -28.00 to 45.00

Closest reciprocal axis to spindle: c\* (angle 33.6 degrees)

Average unit cell: 94.07 99.35 103.13 90.00 90.00 90.00

Selection of intensity type (Isum or Ipr) will be optimised

Profile fitted value Ipr will be used for 1st scaling

Handling of partials:

MPART flags are checked

Summed partials accepted if total fraction is between 0.95 & 1.05

2496 partial sets rejected with total fraction too small

68 partial sets rejected with total fraction too large

0 partial sets rejected with gaps

Outlier rejection parameters:

In scaling:

Reflections measured 3 or more times: 6 maximum deviation from weighted mean of all other observations

Reflections measured twice: 6 maximum deviation from weighted mean

Policy for deviant reflections measured twice: KEEP

Reflections judged implausibly large will be rejected

Maximum and minimum normalised F (ie E) for acentric reflection 10.00, -  
5.00

Maximum and minimum normalised F (ie E) for centric reflection 13.94, -  
6.97

In merging:

Reflections measured 3 or more times: 6 maximum deviation from weighted mean of all other observations

Reflections measured twice: 6 maximum deviation from weighted mean

Policy for deviant reflections measured twice: KEEP

Reflections judged implausibly large will be rejected

|                                                                 |        |   |
|-----------------------------------------------------------------|--------|---|
| Maximum and minimum normalised F (ie E) for acentric reflection | 10.00, | - |
| 5.00                                                            |        |   |
| Maximum and minimum normalised F (ie E) for centric reflection  | 13.94, | - |
| 6.97                                                            |        |   |

Parallisation of refinement:

Refinement stages will use a single processor

>>>> Layout of scale factors: <<<<

Run 1

Smooth scaling: 20 scales at intervals of 5 over range -45 to 45 in  
18 parts

Smooth B-factors: 6 scales at intervals of 22.5 over range -45 to 45 in  
4 parts

Secondary beam correction in camera frame, lmax = 4, 3

Run 2

Smooth scaling: 17 scales at intervals of 4.867 over range -28 to 45 in  
15 parts

Smooth B-factors: 6 scales at intervals of 18.25 over range -28 to 45 in  
4 parts

Secondary beam correction in camera frame, lmax = 4, 3

Allocation of secondary (SURFACE) scales to runs (automatic or from LINKs)

Scale set 1 used for runs 1, 2

Secondary beam parameters will be TIED to zero, ie restrained to a sphere,  
with a standard deviation of 0.005, number of ties 24

Parameter variances (DIAGONAL) will be used for sigma(I) estimates

===== Initial scaling =====

The average fractional overlap =  $N_{\text{overlapped}}/N_{\text{total}}$ , where  $N_{\text{overlapped}}$  is the number of observations

with equivalent observations in a different rotation range, and  $N_{\text{total}}$  is the total number of observations

Average fractional overlap between rotation ranges for run 1

|      |      |      |      |      |      |      |      |      |
|------|------|------|------|------|------|------|------|------|
|      | 0.98 | 0.98 | 0.97 | 0.98 | 0.98 | 0.99 | 0.98 | 0.98 |
| 0.99 | 0.99 |      |      |      |      |      |      |      |
|      | 0.98 | 0.99 | 0.98 | 0.97 | 0.98 | 0.99 | 0.99 | 0.99 |

Average fractional overlap between rotation ranges for run 2

|      |      |      |      |      |      |      |      |      |
|------|------|------|------|------|------|------|------|------|
|      | 0.98 | 0.98 | 0.98 | 0.99 | 0.99 | 0.99 | 0.99 | 0.99 |
| 0.99 | 0.99 |      |      |      |      |      |      |      |
|      | 0.99 | 1.00 | 1.00 | 1.00 | 1.00 |      |      |      |

Overall fractional overlap between rotation ranges 0.99, minimum 0.97

Optimization statistics macrocycle #1

Cycle end-this-cycle change-from-start change-from-last

start -343769.566

#1 -210221.343 133548.223 133548.223

#2 -209767.026 134002.540 454.317

#3 -209766.074 134003.492 0.952

#4 -209766.074 134003.492 0.000

Initial scales for run 1

|       |       |       |       |       |       |       |       |       |
|-------|-------|-------|-------|-------|-------|-------|-------|-------|
|       | 0.838 | 1.045 | 1.095 | 1.158 | 1.277 | 0.960 | 1.219 | 1.154 |
| 1.182 | 1.103 |       |       |       |       |       |       |       |
|       | 1.470 | 1.084 | 0.914 | 1.331 | 1.304 | 1.141 | 1.378 | 1.363 |

Initial scales for run 2

|       |       |       |       |       |       |       |       |
|-------|-------|-------|-------|-------|-------|-------|-------|
| 1.069 | 0.693 | 0.661 | 0.712 | 0.733 | 0.775 | 0.777 | 0.788 |
| 0.803 | 0.918 |       |       |       |       |       |       |
| 0.896 | 1.011 | 1.146 | 1.329 | 1.484 |       |       |       |

Time for initial scaling: cpu time: 0.34 secs, elapsed time: 1.0 secs

Sufficient rotation ranges are above the minimum threshold for fractional overlap between  
rotation ranges = 0.05

===== First round scaling =====

First scaling: 12081 reflections selected from 83675 with I/sd > 17.00, using  
every 3'th reflection above that limit

Optimization statistics macrocycle #1

| Cycle | end-this-cycle | change-from-start | change-from-last |
|-------|----------------|-------------------|------------------|
| start | -167966.050    |                   |                  |
| #1    | -67385.116     | 100580.934        | 100580.934       |
| #2    | -62469.463     | 105496.587        | 4915.653         |

---ITERATION LIMIT OF MACROCYCLE---

Number of outliers within I+ || I- sets: 3172, between I+ & I- 0, on |E|max  
0

Time for 1st scaling: cpu time: 4.26 secs, elapsed time: 4.0 secs

===== Optimising selection of intensity estimate =====

The input HKLIN file contains two estimates of intensity,  
a summation integration value Isum and a profile-fitted value Ipr  
The optimisation here chooses the value which gives the smallest overall Rmeas:  
either Ipr, Isum or a combination of the two based on the Iraw value, where  
Iraw is the Isum value back-corrected for Lorentz and Polarisation

Mean Iraw for all data: 363.3

Rmeas also printed for inner and outer resolution ranges

| Intensity type<br>Resolution range (A) | Rmeas<br>All | Inner<br>41.2-7.85 | Outer<br>1.48-1.46 |
|----------------------------------------|--------------|--------------------|--------------------|
| Summation intensities                  | 0.1605       | 0.1069             | 1.0450             |
| Profile intensities                    | 0.1441       | 0.1153             | 0.7652             |
| Combined intensities Imid = 291        | 0.1372       | 0.1069             | 0.7655             |
| Combined intensities Imid = 436        | 0.1373       | 0.1069             | 0.7653             |

Best value:

|                                 |        |        |        |
|---------------------------------|--------|--------|--------|
| Combined intensities Imid = 291 | 0.1372 | 0.1069 | 0.7655 |
|---------------------------------|--------|--------|--------|

Combined intensities will be used:

weighted mean of profile-fitted (Ipr) & summation (Isum) intensities

$$I = w * Ipr + (1-w) * Isum$$

$$w = 1 / (1 + (Iraw/290.6)^3)$$

Time for optimisation of intensity type selection: cpu time: 0.60 secs, elapsed time:  
1.0 secs

First rough optimisation and analysis of standard deviations

=====

Weighting scheme for averages: variance weights

All runs have fulls & partials

For all runs,

slopes (full, partial) of central part of normal probability plot = 1.12, 1.13

Correction applied to parameters for fulls and partials

SD correction parameters after normal probability correction

| Run                      | Fulls |      |        |      | Partials |      |        |      |
|--------------------------|-------|------|--------|------|----------|------|--------|------|
|                          | SdFac | SdB  | SdAdd  | ISa  | SdFac    | SdB  | SdAdd  | ISa  |
| AllRuns Fulls & partials | 1.12  | 0.00 | 0.0200 | 44.8 | 1.13     | 0.00 | 0.0200 | 44.4 |

I+ and I- will be kept separate in SD optimisation

For SD optimisation, number of outliers within I+ || I- sets: 609, between I+ & I-  
0, on |E|max 0

53845 reflections selected for SD optimisation out of 83675 in file

Damping factor: 0.050

No restraints on SD correction parameters

|       |            |         |
|-------|------------|---------|
| Cycle | 1 residual | 0.81420 |
| Cycle | 2 residual | 0.20470 |
| Cycle | 3 residual | 0.06558 |
| Cycle | 4 residual | 0.02845 |
| Cycle | 5 residual | 0.01469 |
| Cycle | 6 residual | 0.01005 |

SD correction parameters after optimisation

| Run                      | Fulls |      |        |     | Partials |      |        |      |
|--------------------------|-------|------|--------|-----|----------|------|--------|------|
|                          | SdFac | SdB  | SdAdd  | ISa | SdFac    | SdB  | SdAdd  | ISa  |
| AllRuns Fulls & partials | 1.13  | 0.00 | 0.1133 | 7.8 | 0.82     | 0.00 | 0.0806 | 15.1 |

Time for SD optimisation = cpu time: 8.55 secs, elapsed time: 8.0 secs

Number of outliers within I+ || I- sets: 588, between I+ & I- 0, on |E|max  
0

===== Main scaling =====

Main scaling: 38205 reflections selected from 83675 with  $|E^2| > 0.80$  and  $|E^2| < 5.00$

Optimization statistics macrocycle #1

|           | Cycle       | end-this-cycle | change-from-start | change-from-last |
|-----------|-------------|----------------|-------------------|------------------|
| start     |             | -78860.697     |                   |                  |
| neg scale | -0.00519484 | 1.66539        | -1.24995          |                  |
| neg scale | -0.00589145 | 1.59479        | -1.21361          |                  |
| neg scale | -0.0418681  | 1.65277        | -1.25804          |                  |
| neg scale | -0.0103718  | 1.64535        | -1.23962          |                  |
| neg scale | -0.0376837  | 1.68916        | -1.28351          |                  |
| neg scale | -0.00727841 | 1.66709        | -1.25205          |                  |
| neg scale | -0.00161682 | 1.74041        | -1.31767          |                  |
| neg scale | -0.0224111  | 1.58937        | -1.21807          |                  |
| neg scale | -0.010344   | 1.62535        | -1.22881          |                  |
| neg scale | -0.0311172  | 1.72021        | -1.31074          |                  |
| neg scale | -0.0196139  | 1.69807        | -1.28231          |                  |
| neg scale | -0.0172422  | 1.71274        | -1.29511          |                  |
| neg scale | -0.0108184  | 1.72742        | -1.3074           |                  |
| neg scale | -0.0231972  | 1.55514        | -1.20755          |                  |
| neg scale | -0.0388103  | 1.58395        | -1.22256          |                  |
| neg scale | -0.0680452  | 1.59851        | -1.24015          |                  |
| neg scale | -0.0420531  | 1.61279        | -1.23584          |                  |
| neg scale | -0.0294727  | 1.61992        | -1.23404          |                  |
| neg scale | -0.0483754  | 1.63448        | -1.24976          |                  |

neg scale -0.070466 1.70754 -1.31905  
neg scale -0.0617835 1.72221 -1.33121  
neg scale -0.0167834 1.62707 -1.23235  
neg scale -0.0412052 1.72944 -1.32772  
neg scale -0.0279323 1.74416 -1.33918  
neg scale -0.0314665 1.66337 -1.26046  
neg scale -0.0380276 1.67798 -1.2744  
neg scale -0.0398968 1.69262 -1.28768  
neg scale -0.00679386 1.75139 -1.33575  
neg scale -0.016481 1.67054 -1.25865  
neg scale -0.0215013 1.68517 -1.2722  
neg scale -0.00145404 1.67772 -1.25696  
neg scale -0.00666786 1.52086 -1.19417  
neg scale -0.0466672 1.54256 -1.21338  
neg scale -0.0376414 1.54971 -1.21166  
neg scale -0.0763468 1.56425 -1.23081  
neg scale -0.0201741 1.56399 -1.20883  
neg scale -0.0550036 1.57855 -1.22706  
neg scale -0.110584 1.62932 -1.27448  
neg scale -0.12203 1.64389 -1.28942  
neg scale -0.111988 1.68025 -1.31416  
neg scale -0.0940345 1.67281 -1.29796  
neg scale -0.0938212 1.68741 -1.31117  
neg scale -0.0892375 1.70207 -1.32382  
neg scale -0.0680826 1.73144 -1.34757  
neg scale -0.00976649 1.77574 -1.3797  
neg scale -0.0607262 1.72395 -1.33275  
neg scale -0.0105949 1.7682 -1.36574  
neg scale -0.0373511 1.66509 -1.26438  
neg scale -0.0425048 1.6797 -1.27795  
neg scale -0.0433121 1.69432 -1.29097  
neg scale -0.00658323 1.75313 -1.33816  
neg scale -0.0270006 1.68685 -1.27626

neg scale -0.0221158 1.71617 -1.30131  
neg scale -0.00180802 1.7456 -1.32453  
neg scale -0.00996992 1.70871 -1.2873  
neg scale -0.0252891 1.50827 -1.19922  
neg scale -0.0192239 1.51543 -1.19797  
neg scale -0.0520204 1.54429 -1.21584  
neg scale -0.0904209 1.55883 -1.23476  
neg scale -0.0617418 1.58024 -1.23036  
neg scale -0.0888901 1.59479 -1.24722  
neg scale -0.110694 1.60933 -1.26339  
neg scale -0.0522208 1.58739 -1.22919  
neg scale -0.126146 1.68943 -1.33152  
neg scale -0.106937 1.71872 -1.35567  
neg scale -0.0139871 1.57999 -1.21145  
neg scale -0.0992675 1.6382 -1.27481  
neg scale -0.0708921 1.74065 -1.36352  
neg scale -0.0948463 1.68914 -1.31343  
neg scale -0.0668926 1.73315 -1.34923  
neg scale -0.0775729 1.69633 -1.31115  
neg scale -0.0609591 1.72566 -1.3351  
neg scale -0.0154687 1.61595 -1.22639  
neg scale -0.0630331 1.67424 -1.28358  
neg scale -0.0637944 1.68887 -1.29657  
neg scale -0.0528649 1.7182 -1.32098  
neg scale -0.0481783 1.68141 -1.28214  
neg scale -0.0317289 1.70322 -1.29335  
neg scale -0.0269053 1.51716 -1.20107  
neg scale -0.0221888 1.52432 -1.20049  
neg scale -0.0174286 1.53145 -1.20001  
neg scale -0.0594748 1.54601 -1.21912  
neg scale -0.0956633 1.56055 -1.23739  
neg scale -0.126216 1.57509 -1.25491  
neg scale -0.151097 1.58963 -1.27167

neg scale -0.0128893 1.53859 -1.19976  
neg scale -0.115798 1.58224 -1.2533  
neg scale -0.139146 1.59678 -1.26972  
neg scale -0.0784624 1.57482 -1.23516  
neg scale -0.161594 1.67678 -1.33893  
neg scale -0.11557 1.61105 -1.26643  
neg scale -0.130605 1.62561 -1.28149  
neg scale -0.143812 1.68396 -1.33604  
neg scale -0.136306 1.69858 -1.34835  
neg scale -0.0909643 1.74266 -1.3824  
neg scale -0.117498 1.63276 -1.27982  
neg scale -0.126432 1.64731 -1.29403  
neg scale -0.126104 1.69113 -1.33335  
neg scale -0.105424 1.72046 -1.35711  
neg scale -0.0531558 1.59623 -1.23308  
neg scale -0.0921501 1.62535 -1.26382  
neg scale -0.104457 1.63989 -1.27833  
neg scale -0.11387 1.68368 -1.31853  
neg scale -0.108401 1.69833 -1.33089  
neg scale -0.0970933 1.69087 -1.31641  
neg scale -0.0805944 1.72019 -1.34037  
neg scale -0.0840204 1.68341 -1.30214  
neg scale -0.0806316 1.69803 -1.31458  
neg scale -0.00599583 1.6031 -1.21695  
neg scale -0.027801 1.61765 -1.23225  
neg scale -0.0448301 1.63222 -1.24696  
neg scale -0.0573073 1.6468 -1.26114  
neg scale -0.069104 1.67595 -1.28799  
neg scale -0.0192328 1.6248 -1.23221  
neg scale -0.0547873 1.68315 -1.2869  
neg scale -0.0531482 1.69777 -1.29938  
neg scale -0.0245196 1.64648 -1.24641  
neg scale -0.0394713 1.6757 -1.2733

neg scale -0.04065 1.6903 -1.286  
neg scale -0.0145307 1.65364 -1.24644  
neg scale -0.0224482 1.66824 -1.25975  
neg scale -0.0981496 1.512 -1.22726  
neg scale -0.0442254 1.50457 -1.20578  
neg scale -0.0921641 1.51915 -1.22611  
neg scale -0.0404833 1.51173 -1.20532  
neg scale -0.074656 1.54059 -1.22369  
neg scale -0.185505 1.62045 -1.30463  
neg scale -0.193488 1.63499 -1.319  
neg scale -0.0254092 1.5403 -1.20482  
neg scale -0.143668 1.5985 -1.27256  
neg scale -0.160172 1.61305 -1.28785  
neg scale -0.171743 1.62758 -1.30254  
neg scale -0.180597 1.65674 -1.33018  
neg scale -0.178344 1.67132 -1.3432  
neg scale -0.17177 1.68595 -1.35567  
neg scale -0.161293 1.70058 -1.36767  
neg scale -0.112763 1.59107 -1.25569  
neg scale -0.164561 1.66389 -1.32778  
neg scale -0.16126 1.6785 -1.34057  
neg scale -0.15388 1.69312 -1.35287  
neg scale -0.0798976 1.58366 -1.23898  
neg scale -0.10333 1.59821 -1.25484  
neg scale -0.148687 1.65646 -1.31255  
neg scale -0.144242 1.68567 -1.33816  
neg scale -0.0721801 1.5908 -1.23863  
neg scale -0.0940102 1.60535 -1.25419  
neg scale -0.133655 1.66363 -1.3107  
neg scale -0.127246 1.69285 -1.33596  
neg scale -0.0644141 1.59797 -1.23842  
neg scale -0.116613 1.68539 -1.32179  
neg scale -0.110303 1.70002 -1.33395

neg scale -0.0334184 1.59053 -1.22287  
neg scale -0.0752021 1.61963 -1.25326  
neg scale -0.100569 1.69258 -1.32012  
neg scale -0.00110623 1.58311 -1.20753  
neg scale -0.065797 1.62677 -1.25302  
neg scale -0.0896963 1.67051 -1.29382  
neg scale -0.0562497 1.63392 -1.25287  
neg scale -0.0760344 1.67768 -1.29294  
neg scale -0.0149524 1.61192 -1.22434  
neg scale -0.00854363 1.61907 -1.22503  
neg scale -0.0250723 1.63363 -1.23928  
neg scale -0.002045 1.62621 -1.22582  
neg scale -0.00392656 1.47019 -1.18849  
neg scale -0.1141 1.4994 -1.23174  
neg scale -0.00356143 1.47738 -1.18861  
neg scale -0.109138 1.50656 -1.23073  
neg scale -0.152623 1.52113 -1.25042  
neg scale -0.0567028 1.49914 -1.20982  
neg scale -0.10424 1.51372 -1.22989  
neg scale -0.145731 1.52828 -1.2491  
neg scale -0.181242 1.54283 -1.2675  
neg scale -0.00266044 1.49169 -1.18919  
neg scale -0.0539765 1.50629 -1.20964  
neg scale -0.099361 1.52086 -1.2292  
neg scale -0.138898 1.53543 -1.24796  
neg scale -0.00201391 1.49886 -1.18961  
neg scale -0.0945229 1.52801 -1.22868  
neg scale -0.132097 1.54256 -1.24698  
neg scale -0.164024 1.55712 -1.26455  
neg scale -0.00137447 1.50601 -1.19016  
neg scale -0.0482889 1.5206 -1.20962  
neg scale -0.0894686 1.53516 -1.22822  
neg scale -0.125341 1.5497 -1.24618

neg scale -0.213925 1.60787 -1.31083  
neg scale -0.0005932 1.51316 -1.1908  
neg scale -0.138272 1.57853 -1.26136  
neg scale -0.188499 1.68049 -1.35995  
neg scale -0.178194 1.69511 -1.37195  
neg scale -0.129812 1.58567 -1.26067  
neg scale -0.181703 1.65844 -1.33238  
neg scale -0.16002 1.70231 -1.36921  
neg scale -0.121259 1.59277 -1.26008  
neg scale -0.153888 1.69485 -1.35504  
neg scale -0.0328456 1.55631 -1.21154  
neg scale -0.112601 1.59991 -1.25961  
neg scale -0.149101 1.64358 -1.30258  
neg scale -0.150922 1.67279 -1.32862  
neg scale -0.145693 1.68739 -1.34096  
neg scale -0.135689 1.67993 -1.32707  
neg scale -0.108934 1.62875 -1.27338  
neg scale -0.0480498 1.59225 -1.2294  
neg scale -0.0694825 1.6068 -1.24447  
neg scale -0.0863377 1.62133 -1.25902  
neg scale -0.106444 1.65048 -1.28657  
neg scale -0.0427368 1.59935 -1.23014  
neg scale -0.062338 1.61391 -1.24486  
neg scale -0.0370482 1.60649 -1.2309  
neg scale -0.0550393 1.62104 -1.24535  
neg scale -0.0106018 1.59906 -1.21714  
neg scale -0.0118932 1.43595 -1.19196  
neg scale -0.0126589 1.44315 -1.19186  
neg scale -0.0759326 1.46501 -1.21492  
neg scale -0.0742244 1.47219 -1.21446  
neg scale -0.127912 1.4868 -1.23587  
neg scale -0.0148411 1.46475 -1.19234  
neg scale -0.0154986 1.47193 -1.19274

neg scale -0.120137 1.50113 -1.23431  
neg scale -0.163349 1.5157 -1.25377  
neg scale -0.0691179 1.49369 -1.21393  
neg scale -0.157501 1.52285 -1.25276  
neg scale -0.192865 1.5374 -1.27096  
neg scale -0.222445 1.55195 -1.28841  
neg scale -0.112385 1.51542 -1.23335  
neg scale -0.18522 1.54455 -1.26969  
neg scale -0.0653667 1.50801 -1.21415  
neg scale -0.22478 1.58078 -1.30132  
neg scale -0.251138 1.60985 -1.33149  
neg scale -0.0168469 1.50057 -1.1952  
neg scale -0.228371 1.60245 -1.3148  
neg scale -0.21226 1.68248 -1.37892  
neg scale -0.199137 1.6971 -1.39063  
neg scale -0.19487 1.68964 -1.37626  
neg scale -0.0918257 1.55114 -1.23312  
neg scale -0.181625 1.6093 -1.29585  
neg scale -0.191724 1.62387 -1.31004  
neg scale -0.195517 1.66759 -1.34971  
neg scale -0.18839 1.68219 -1.36197  
neg scale -0.0160539 1.52918 -1.19908  
neg scale -0.0874585 1.55828 -1.23342  
neg scale -0.157189 1.60189 -1.28036  
neg scale -0.170665 1.61645 -1.29485  
neg scale -0.183949 1.64556 -1.32231  
neg scale -0.179824 1.67477 -1.34782  
neg scale -0.130892 1.5945 -1.26503  
neg scale -0.122883 1.60164 -1.26491  
neg scale -0.0734951 1.57968 -1.23489  
neg scale -0.0965257 1.59423 -1.25018  
neg scale -0.106561 1.61592 -1.26501  
neg scale -0.0109324 1.24947 -1.25263

neg scale -0.063897 1.59394 -1.23652  
neg scale -0.0832856 1.60849 -1.25112  
neg scale -0.0183681 1.43047 -1.19469  
neg scale -0.0203436 1.43769 -1.19494  
neg scale -0.0840865 1.45956 -1.21796  
neg scale -0.136762 1.48135 -1.23894  
neg scale -0.178888 1.5031 -1.2581  
neg scale -0.174072 1.51027 -1.25723  
neg scale -0.0804392 1.49541 -1.21838  
neg scale -0.12514 1.50999 -1.23749  
neg scale -0.26522 1.58276 -1.3223  
neg scale -0.0208168 1.32791 -1.21762  
neg scale -0.19094 1.54627 -1.27267  
neg scale -0.23817 1.57536 -1.30517  
neg scale -0.253933 1.5899 -1.32046  
neg scale -0.270664 1.61898 -1.34929  
neg scale -0.244877 1.66984 -1.38563  
neg scale -0.00169975 1.31028 -1.2169  
neg scale -0.0769317 1.51687 -1.21987  
neg scale -0.242296 1.64784 -1.35823  
neg scale -0.228128 1.67702 -1.38301  
neg scale -0.143895 1.55312 -1.25482  
neg scale -0.221289 1.66957 -1.3686  
neg scale -0.0339812 1.5166 -1.20362  
neg scale -0.0738974 1.53119 -1.22133  
neg scale -0.208409 1.61842 -1.31485  
neg scale -0.213955 1.633 -1.32844  
neg scale -0.215315 1.64757 -1.34166  
neg scale -0.212376 1.66214 -1.35435  
neg scale -0.156173 1.58193 -1.27051  
neg scale -0.18796 1.611 -1.29992  
neg scale -0.201367 1.6547 -1.34019  
neg scale -0.127555 1.57452 -1.25526

neg scale -0.185197 1.63271 -1.31296  
neg scale -0.11585 1.58878 -1.25602  
neg scale -0.13409 1.60334 -1.2707  
neg scale -0.147714 1.61789 -1.28484  
neg scale -0.0891296 1.58136 -1.24188  
neg scale -0.00154306 1.55911 -1.20041  
neg scale -0.0917944 1.4469 -1.2211  
neg scale -0.0310023 1.43943 -1.19874  
neg scale -0.147402 1.46873 -1.24254  
neg scale -0.0338464 1.44663 -1.19947  
neg scale -0.0927281 1.46129 -1.22123  
neg scale -0.192356 1.49053 -1.26211  
neg scale -0.0931929 1.46845 -1.22152  
neg scale -0.143807 1.48308 -1.24184  
neg scale -0.1886 1.49767 -1.26138  
neg scale -0.0389558 1.46102 -1.20113  
neg scale -0.14195 1.49025 -1.2417  
neg scale -0.0412206 1.4682 -1.20206  
neg scale -0.0934942 1.4828 -1.22229  
neg scale -0.140014 1.49742 -1.24168  
neg scale -0.245453 1.5411 -1.29532  
neg scale -0.269466 1.55564 -1.31179  
neg scale -0.0749801 1.3324 -1.23757  
neg scale -0.210092 1.5337 -1.27742  
neg scale -0.237934 1.54824 -1.2942  
neg scale -0.260476 1.56279 -1.31036  
neg scale -0.277728 1.57733 -1.32585  
neg scale -0.267267 1.58447 -1.32429  
neg scale -0.278219 1.59899 -1.33892  
neg scale -0.133341 1.51885 -1.24223  
neg scale -0.222848 1.56253 -1.29248  
neg scale -0.271299 1.6207 -1.35106  
neg scale -0.267861 1.64981 -1.37717

neg scale -0.259903 1.66439 -1.38951  
neg scale -0.0486723 1.49688 -1.20658  
neg scale -0.164119 1.54054 -1.25964  
neg scale -0.246181 1.59873 -1.32165  
neg scale -0.258226 1.62782 -1.34931  
neg scale -0.257536 1.64239 -1.36237  
neg scale -0.252693 1.65695 -1.37499  
neg scale -0.0916635 1.5186 -1.22582  
neg scale -0.159638 1.54768 -1.25977  
neg scale -0.24324 1.64955 -1.36058  
neg scale -0.0729461 1.29025 -1.25572  
neg scale -0.214357 1.59846 -1.30549  
neg scale -0.224677 1.61299 -1.3196  
neg scale -0.0897136 1.53289 -1.22782  
neg scale -0.045441 1.27241 -1.2537  
neg scale -0.0529103 1.52543 -1.21221  
neg scale -0.0882987 1.54002 -1.22888  
neg scale -0.0150247 1.51802 -1.19681  
neg scale -0.0534544 1.53258 -1.21379  
neg scale -0.115851 1.5617 -1.24594  
neg scale -0.152968 1.59789 -1.27643  
neg scale -0.108993 1.57594 -1.24804  
neg scale -0.0465379 1.43716 -1.2046  
neg scale -0.018719 1.39779 -1.19869  
neg scale -0.0275846 1.41228 -1.19989  
neg scale -0.0955965 1.42701 -1.22383  
neg scale -0.0358892 1.42674 -1.20143  
neg scale -0.10056 1.44864 -1.22439  
neg scale -0.0440382 1.36785 -1.21436  
neg scale -0.203772 1.47791 -1.26581  
neg scale -0.201022 1.48508 -1.26519  
neg scale -0.0471475 1.44836 -1.20432  
neg scale -0.034014 1.35037 -1.21532

neg scale -0.153721 1.47764 -1.24542  
neg scale -0.050464 1.45555 -1.2054  
neg scale -0.0816593 1.34364 -1.23624  
neg scale -0.104522 1.47018 -1.22589  
neg scale -0.263272 1.52855 -1.29987  
neg scale -0.0203038 1.33281 -1.21568  
neg scale -0.299669 1.56476 -1.33096  
neg scale -0.313304 1.57931 -1.34607  
neg scale -0.222405 1.52827 -1.28141  
neg scale -0.272702 1.55736 -1.31406  
neg scale -0.302438 1.58645 -1.34431  
neg scale -0.30992 1.601 -1.35857  
neg scale -0.107381 1.31928 -1.25635  
neg scale -0.106883 1.49168 -1.22813  
neg scale -0.243527 1.54996 -1.29737  
neg scale -0.289996 1.6518 -1.39571  
neg scale -0.0461417 1.30841 -1.23562  
neg scale -0.0618779 1.48427 -1.21045  
neg scale -0.107309 1.49886 -1.22904  
neg scale -0.147507 1.51341 -1.24695  
neg scale -0.280413 1.60071 -1.34129  
neg scale -0.282452 1.64437 -1.38111  
neg scale -0.0857164 1.30161 -1.25539  
neg scale -0.0642303 1.49143 -1.21188  
neg scale -0.178873 1.53511 -1.26442  
neg scale -0.0662245 1.49859 -1.21333  
neg scale -0.143865 1.52772 -1.24823  
neg scale -0.175123 1.54228 -1.26474  
neg scale -0.0607381 1.28383 -1.2539  
neg scale -0.107374 1.52031 -1.23223  
neg scale -0.240702 1.60758 -1.32439  
neg scale -0.10682 1.52744 -1.23338  
neg scale -0.139482 1.542 -1.24985

neg scale -0.22159 1.60016 -1.31003  
neg scale -0.0327436 1.26596 -1.25195  
neg scale -0.106409 1.53458 -1.23475  
neg scale -0.136857 1.54913 -1.25073  
neg scale -0.200609 1.59277 -1.29581  
neg scale -0.0648188 1.25906 -1.27067  
neg scale -0.10564 1.54171 -1.23613  
neg scale -0.134367 1.55626 -1.25183  
neg scale -0.0369028 1.51973 -1.2052  
neg scale -0.0729886 1.5343 -1.22164  
neg scale -0.131551 1.56339 -1.25297  
neg scale -0.039355 1.52687 -1.20736  
neg scale -0.103247 1.55598 -1.23906  
neg scale -0.0452933 1.43094 -1.20457  
neg scale -0.0165843 1.38501 -1.20018  
neg scale -0.0493774 1.41368 -1.20781  
neg scale -0.0223193 1.39228 -1.20096  
neg scale -0.0496551 1.39635 -1.21048  
neg scale -0.102908 1.38968 -1.23216  
neg scale -0.162855 1.45062 -1.24867  
neg scale -0.0967654 1.37228 -1.23373  
neg scale -0.048512 1.42848 -1.20596  
neg scale -0.10889 1.44317 -1.22779  
neg scale -0.0386183 1.36154 -1.21392  
neg scale -0.163169 1.45782 -1.24868  
neg scale -0.211449 1.47246 -1.26872  
neg scale -0.163447 1.46501 -1.24884  
neg scale -0.0576717 1.44289 -1.20843  
neg scale -0.0274856 1.34403 -1.21475  
neg scale -0.279194 1.51596 -1.30415  
neg scale -0.0736712 1.3373 -1.23525  
neg scale -0.163274 1.48653 -1.24987  
neg scale -0.26805 1.53024 -1.30255

neg scale -0.16281 1.49369 -1.25038  
neg scale -0.234391 1.52284 -1.28539  
neg scale -0.314823 1.58102 -1.34794  
neg scale -0.324167 1.62465 -1.38898  
neg scale -0.120325 1.48625 -1.23287  
neg scale -0.30463 1.58814 -1.3466  
neg scale -0.31301 1.61724 -1.374  
neg scale -0.31062 1.63178 -1.38697  
neg scale -0.036466 1.302 -1.23454  
neg scale -0.225798 1.53712 -1.28526  
neg scale -0.250357 1.55167 -1.30116  
neg scale -0.284374 1.58074 -1.33116  
neg scale -0.193387 1.5297 -1.26922  
neg scale -0.244155 1.55877 -1.30092  
neg scale -0.283716 1.60242 -1.34433  
neg scale -0.036225 1.47854 -1.20059  
neg scale -0.123176 1.50772 -1.23638  
neg scale -0.216517 1.55139 -1.28555  
neg scale -0.0408412 1.48569 -1.20272  
neg scale -0.0846645 1.50029 -1.22051  
neg scale -0.187204 1.54397 -1.27038  
neg scale -0.0869476 1.50743 -1.22228  
neg scale -0.0490737 1.5 -1.20706  
neg scale -0.154426 1.54369 -1.25646  
neg scale -0.0527884 1.50714 -1.2093  
neg scale -0.0905718 1.52172 -1.22595  
neg scale -0.123827 1.53628 -1.24208  
neg scale -0.152426 1.55081 -1.25767  
neg scale -0.0560869 1.51429 -1.21155  
neg scale -0.0209011 1.50685 -1.19742  
neg scale -0.0150882 1.52111 -1.19732  
neg scale -0.0599842 1.48688 -1.20992  
neg scale -0.0377705 1.44196 -1.20111

neg scale -0.0967907 1.43534 -1.22361  
neg scale -0.0193029 1.37949 -1.20231  
neg scale -0.0475487 1.40742 -1.20796  
neg scale -0.101494 1.40077 -1.22954  
neg scale -0.102064 1.4088 -1.22849  
neg scale -0.0466151 1.39009 -1.21046  
neg scale -0.10613 1.41604 -1.22908  
neg scale -0.0456078 1.40853 -1.20708  
neg scale -0.109936 1.42327 -1.22971  
neg scale -0.168312 1.43795 -1.25146  
neg scale -0.0418362 1.37268 -1.21234  
neg scale -0.113667 1.43049 -1.23047  
neg scale -0.219822 1.45982 -1.27194  
neg scale -0.258619 1.48879 -1.2903  
neg scale -0.0214486 1.3377 -1.21446  
neg scale -0.315943 1.52509 -1.32419  
neg scale -0.1741 1.47391 -1.25341  
neg scale -0.216143 1.48851 -1.27186  
neg scale -0.283926 1.51768 -1.30676  
neg scale -0.309716 1.53224 -1.32324  
neg scale -0.330189 1.54679 -1.33907  
neg scale -0.345554 1.56131 -1.3543  
neg scale -0.00575734 1.32008 -1.21462  
neg scale -0.249641 1.51025 -1.28951  
neg scale -0.279224 1.52481 -1.30632  
neg scale -0.349846 1.61207 -1.39451  
neg scale -0.213367 1.50282 -1.27247  
neg scale -0.296868 1.5465 -1.32176  
neg scale -0.314381 1.56105 -1.33696  
neg scale -0.327004 1.57559 -1.35162  
neg scale -0.338225 1.60466 -1.37942  
neg scale -0.337062 1.61921 -1.39255  
neg scale -0.0867469 1.46619 -1.21902

neg scale -0.175222 1.49539 -1.25561  
neg scale -0.211696 1.50997 -1.27292  
neg scale -0.242932 1.52454 -1.28959  
neg scale -0.269109 1.53909 -1.3057  
neg scale -0.290059 1.55365 -1.32115  
neg scale -0.324195 1.59725 -1.36443  
neg scale -0.326295 1.6118 -1.37782  
neg scale -0.209783 1.51712 -1.27345  
neg scale -0.23931 1.53168 -1.28979  
neg scale -0.263749 1.54624 -1.30554  
neg scale -0.298024 1.5753 -1.33545  
neg scale -0.307862 1.58985 -1.34954  
neg scale -0.0642275 1.28877 -1.25275  
neg scale -0.0466811 1.46591 -1.20403  
neg scale -0.137103 1.49512 -1.24027  
neg scale -0.207658 1.52429 -1.27406  
neg scale -0.235451 1.53882 -1.29008  
neg scale -0.289509 1.58243 -1.33485  
neg scale -0.0977883 1.48768 -1.22429  
neg scale -0.17438 1.51684 -1.25851  
neg scale -0.252619 1.5605 -1.30562  
neg scale -0.0574532 1.48025 -1.20855  
neg scale -0.139707 1.50941 -1.24318  
neg scale -0.103847 1.50199 -1.22808  
neg scale -0.172701 1.53112 -1.26085  
neg scale -0.106364 1.50913 -1.23002  
neg scale -0.141301 1.5237 -1.24635  
neg scale -0.0290556 1.48711 -1.19848  
neg scale -0.10867 1.51626 -1.23203  
neg scale -0.0206936 1.51494 -1.19844  
neg scale -0.0437468 1.49783 -1.20484  
neg scale -0.0141588 1.36668 -1.20331  
neg scale -0.168854 1.41804 -1.25364

neg scale -0.14703 1.38784 -1.25012  
neg scale -0.04536 1.39578 -1.20896  
neg scale -0.226143 1.44717 -1.27486  
neg scale -0.140284 1.37045 -1.25171  
neg scale -0.30847 1.4836 -1.31261  
neg scale -0.0285144 1.3489 -1.21364  
neg scale -0.130006 1.35297 -1.2528  
neg scale -0.335703 1.50535 -1.32924  
neg scale -0.0740671 1.34218 -1.2337  
neg scale -0.301641 1.49793 -1.31124  
neg scale -0.33061 1.51251 -1.32825  
neg scale -0.354147 1.52707 -1.34461  
neg scale -0.297935 1.50509 -1.31072  
neg scale -0.325372 1.51966 -1.32742  
neg scale -0.0842917 1.43916 -1.21862  
neg scale -0.0588846 1.32459 -1.23405  
neg scale -0.319914 1.52681 -1.32668  
neg scale -0.340559 1.54133 -1.34243  
neg scale -0.0338964 1.43166 -1.2003  
neg scale -0.0898071 1.44635 -1.22037  
neg scale -0.0988007 1.31783 -1.25336  
neg scale -0.189811 1.32191 -1.29149  
neg scale -0.140512 1.461 -1.23969  
neg scale -0.225962 1.49022 -1.27622  
neg scale -0.290083 1.51938 -1.31008  
neg scale -0.314432 1.53393 -1.32615  
neg scale -0.357003 1.57757 -1.37077  
neg scale -0.361886 1.60663 -1.39791  
neg scale -0.18707 1.48278 -1.25924  
neg scale -0.285997 1.52652 -1.30998  
neg scale -0.146589 1.47534 -1.24247  
neg scale -0.255488 1.51909 -1.29397  
neg scale -0.318794 1.56276 -1.34016

neg scale -0.330285 1.5773 -1.35454  
neg scale -0.0552394 1.45326 -1.2072  
neg scale -0.104455 1.46789 -1.2258  
neg scale -0.223102 1.5117 -1.27813  
neg scale -0.252545 1.52624 -1.29435  
neg scale -0.296515 1.55535 -1.32511  
neg scale -0.0617347 1.46043 -1.20957  
neg scale -0.109036 1.47506 -1.22781  
neg scale -0.18911 1.50428 -1.2625  
neg scale -0.272203 1.54793 -1.31018  
neg scale -0.113147 1.48221 -1.22979  
neg scale -0.189208 1.51142 -1.26369  
neg scale -0.155446 1.50395 -1.24869  
neg scale -0.0577365 1.25756 -1.26842  
neg scale -0.156955 1.51111 -1.25038  
neg scale -0.00117126 1.46703 -1.18742  
neg scale -0.10989 1.24374 -1.30356  
neg scale -0.00955807 1.55348 -1.20196  
neg scale -0.0266868 1.50877 -1.1998  
neg scale -0.0909754 1.5022 -1.22315  
neg scale -0.0483115 1.49166 -1.20596  
neg scale -0.00299005 1.4811 -1.18859  
neg scale -0.0659369 1.47452 -1.21144  
neg scale -0.0795903 1.45735 -1.21627  
neg scale -0.136379 1.45075 -1.23818  
neg scale -0.00696629 1.3538 -1.20397  
neg scale -0.0440036 1.41224 -1.20599  
neg scale -0.0254712 1.36842 -1.20715  
neg scale -0.146762 1.39893 -1.24775  
neg scale -0.104813 1.39055 -1.23273  
neg scale -0.043053 1.38301 -1.21051  
neg scale -0.111013 1.39779 -1.23377  
neg scale -0.172999 1.41255 -1.25609

neg scale -0.0512581 1.39028 -1.21218  
neg scale -0.0594051 1.39753 -1.21396  
neg scale -0.122765 1.41228 -1.23605  
neg scale -0.0345212 1.36009 -1.21274  
neg scale -0.134938 1.36414 -1.25133  
neg scale -0.317402 1.47098 -1.3159  
neg scale -0.34334 1.49991 -1.33204  
neg scale -0.368523 1.51449 -1.34863  
neg scale -0.275496 1.4779 -1.29686  
neg scale -0.339112 1.50707 -1.33133  
neg scale -0.362792 1.52164 -1.34758  
neg scale -0.0288237 1.41173 -1.20042  
neg scale -0.27439 1.48506 -1.29698  
neg scale -0.33464 1.51422 -1.33071  
neg scale -0.386089 1.55786 -1.37682  
neg scale -0.095204 1.43368 -1.22313  
neg scale -0.0519109 1.31822 -1.23379  
neg scale -0.236618 1.4776 -1.2797  
neg scale -0.273116 1.4922 -1.29721  
neg scale -0.33007 1.52138 -1.33027  
neg scale -0.366474 1.55045 -1.36095  
neg scale -0.377319 1.565 -1.3755  
neg scale -0.0459942 1.4262 -1.20522  
neg scale -0.101519 1.44087 -1.22508  
neg scale -0.196987 1.47016 -1.26261  
neg scale -0.2369 1.48476 -1.28038  
neg scale -0.271525 1.49936 -1.29749  
neg scale -0.301007 1.51393 -1.31401  
neg scale -0.358799 1.5576 -1.36004  
neg scale -0.107399 1.44807 -1.22702  
neg scale -0.269788 1.5065 -1.2979  
neg scale -0.320266 1.53564 -1.32969  
neg scale -0.159346 1.46991 -1.24732

neg scale -0.20051 1.48452 -1.26493  
neg scale -0.236672 1.49911 -1.28195  
neg scale -0.314982 1.54278 -1.32954  
neg scale -0.33131 1.55732 -1.34434  
neg scale -0.0155566 1.43309 -1.19348  
neg scale -0.162576 1.47708 -1.24893  
neg scale -0.201921 1.49167 -1.26621  
neg scale -0.265535 1.52083 -1.29896  
neg scale -0.0247303 1.44031 -1.1964  
neg scale -0.0764836 1.45497 -1.21512  
neg scale -0.132587 1.28004 -1.2885  
neg scale -0.0831623 1.46214 -1.21762  
neg scale -0.159584 1.27317 -1.30614  
neg scale -0.203601 1.50597 -1.26882  
neg scale -0.0895758 1.4693 -1.22017  
neg scale -0.183417 1.26629 -1.32346  
neg scale -0.132498 1.48392 -1.23744  
neg scale -0.0182567 1.57489 -1.21142  
neg scale -0.00863193 1.51971 -1.19471  
neg scale -0.00821165 1.47491 -1.19019  
neg scale -0.112936 1.47889 -1.22951  
neg scale -0.0693096 1.46833 -1.2125  
neg scale -0.180765 1.45512 -1.2558  
neg scale -0.0337165 1.44051 -1.19968  
neg scale -0.1368 1.44452 -1.23857  
neg scale -0.0900784 1.43391 -1.22116  
neg scale -0.142875 1.42729 -1.24219  
neg scale -0.192027 1.42067 -1.2628  
neg scale -0.00827875 1.34825 -1.20607  
neg scale -0.018745 1.35557 -1.20796  
neg scale -0.093392 1.37045 -1.23287  
neg scale -0.0288985 1.36288 -1.20985  
neg scale -0.101011 1.37773 -1.23406

neg scale -0.038583 1.37018 -1.2117  
neg scale -0.108495 1.38501 -1.23534  
neg scale -0.229791 1.41457 -1.27959  
neg scale -0.0926989 1.38197 -1.22982  
neg scale -0.0481536 1.37749 -1.21364  
neg scale -0.115711 1.39228 -1.23667  
neg scale -0.122488 1.39953 -1.23797  
neg scale -0.0314919 1.35376 -1.21335  
neg scale -0.323138 1.46552 -1.31844  
neg scale -0.357152 1.48014 -1.33629  
neg scale -0.190572 1.42874 -1.26129  
neg scale -0.075933 1.34705 -1.23281  
neg scale -0.240076 1.44341 -1.28101  
neg scale -0.321766 1.4727 -1.31809  
neg scale -0.35413 1.4873 -1.33557  
neg scale -0.241995 1.45061 -1.28153  
neg scale -0.283891 1.46527 -1.30005  
neg scale -0.091044 1.41376 -1.22356  
neg scale -0.147391 1.42846 -1.24386  
neg scale -0.198325 1.44314 -1.26339  
neg scale -0.243862 1.45779 -1.28222  
neg scale -0.371344 1.5162 -1.35065  
neg scale -0.40362 1.54532 -1.38119  
neg scale -0.0986455 1.42098 -1.22561  
neg scale -0.316368 1.49421 -1.31772  
neg scale -0.395839 1.55243 -1.37999  
neg scale -0.314078 1.50134 -1.31777  
neg scale -0.360908 1.53047 -1.34946  
neg scale -0.387745 1.55957 -1.37888  
neg scale -0.247618 1.47931 -1.28459  
neg scale -0.282198 1.4939 -1.30157  
neg scale -0.335981 1.52306 -1.33378  
neg scale -0.355225 1.53762 -1.34898

neg scale -0.369793 1.55216 -1.36376  
neg scale -0.00905103 1.41318 -1.19297  
neg scale -0.125866 1.44977 -1.23411  
neg scale -0.147697 1.29141 -1.28858  
neg scale -0.279846 1.50824 -1.30284  
neg scale -0.305928 1.52278 -1.31859  
neg scale -0.0297105 1.42763 -1.19908  
neg scale -0.00205154 1.27629 -1.23299  
neg scale -0.0488534 1.44201 -1.2052  
neg scale -0.0651391 1.26254 -1.26854  
neg scale -0.00635521 1.43452 -1.19003  
neg scale -0.00667096 1.25146 -1.24945  
neg scale -0.091335 1.53458 -1.22882  
neg scale -0.0551847 1.52405 -1.21282  
neg scale -0.0997738 1.48983 -1.22523  
neg scale -0.0578643 1.47927 -1.20865  
neg scale -0.0135714 1.46869 -1.19195  
neg scale -0.0270229 1.45151 -1.19684  
neg scale -0.181005 1.44892 -1.25604  
neg scale -0.0366301 1.43429 -1.20112  
neg scale -0.137441 1.43831 -1.23916  
neg scale -0.0911125 1.42769 -1.22206  
neg scale -0.0424335 1.41704 -1.20483  
neg scale -0.0771441 1.35029 -1.23225  
neg scale -0.0863587 1.35761 -1.23366  
neg scale -0.0952088 1.36491 -1.23508  
neg scale -0.163056 1.37976 -1.25861  
neg scale -0.094105 1.39306 -1.22806  
neg scale -0.0322215 1.35734 -1.21262  
neg scale -0.103902 1.37221 -1.23658  
neg scale -0.169467 1.38704 -1.25949  
neg scale -0.285965 1.43101 -1.30237  
neg scale -0.287666 1.43822 -1.30249

neg scale -0.329179 1.45287 -1.32131  
neg scale -0.328884 1.46007 -1.32112  
neg scale -0.391529 1.48929 -1.35586  
neg scale -0.246659 1.43794 -1.28421  
neg scale -0.387828 1.49645 -1.35505  
neg scale -0.149559 1.41573 -1.24618  
neg scale -0.291342 1.45981 -1.30338  
neg scale -0.383917 1.50361 -1.35438  
neg scale -0.419382 1.53274 -1.38533  
neg scale -0.100137 1.40825 -1.22783  
neg scale -0.355765 1.49619 -1.33777  
neg scale -0.398626 1.52533 -1.3693  
neg scale -0.412513 1.53988 -1.38422  
neg scale -0.4216 1.5544 -1.39861  
neg scale -0.0493857 1.40071 -1.20965  
neg scale -0.292483 1.47413 -1.30437  
neg scale -0.325232 1.48877 -1.32127  
neg scale -0.352937 1.50335 -1.33766  
neg scale -0.375358 1.51792 -1.35338  
neg scale -0.392842 1.53245 -1.36858  
neg scale -0.059473 1.40797 -1.21236  
neg scale -0.29271 1.48129 -1.30501  
neg scale -0.3238 1.49589 -1.32159  
neg scale -0.173902 1.44461 -1.25334  
neg scale -0.161617 1.30277 -1.28851  
neg scale -0.29264 1.48845 -1.30571  
neg scale -0.322066 1.50304 -1.32198  
neg scale -0.34643 1.51762 -1.33768  
neg scale -0.0789238 1.4224 -1.21793  
neg scale -0.0184629 1.2877 -1.23396  
neg scale -0.131439 1.4371 -1.23688  
neg scale -0.107839 1.29182 -1.27018  
neg scale -0.292297 1.49564 -1.30649

neg scale -0.0880169 1.42962 -1.22071  
neg scale -0.0520988 1.28082 -1.25182  
neg scale -0.224832 1.4736 -1.27442  
neg scale -0.0966116 1.43682 -1.22345  
neg scale -0.0829499 1.27399 -1.26941  
neg scale -0.145011 1.4515 -1.24156  
neg scale -0.164626 1.27814 -1.30518  
neg scale -0.0538858 1.42933 -1.20789  
neg scale -0.0260304 1.26295 -1.25082  
neg scale -0.10202 1.55602 -1.23858  
neg scale -0.0702606 1.5455 -1.22317  
neg scale -0.122833 1.51132 -1.23679  
neg scale -0.0853829 1.50078 -1.22084  
neg scale -0.179484 1.50475 -1.25859  
neg scale -0.143302 1.49421 -1.24263  
neg scale -0.159904 1.47707 -1.24786  
neg scale -0.119469 1.4665 -1.23156  
neg scale -0.211817 1.47049 -1.26879  
neg scale -0.172664 1.45991 -1.25249  
neg scale -0.0311805 1.4453 -1.19854  
neg scale -0.039527 1.42807 -1.20266  
neg scale -0.0441203 1.41079 -1.20622  
neg scale -0.141924 1.41481 -1.24326  
neg scale -0.149226 1.35965 -1.25861  
neg scale -0.0945873 1.40413 -1.22631  
neg scale -0.0450985 1.39344 -1.20927  
neg scale -0.0973008 1.35937 -1.2375  
neg scale -0.22586 1.38907 -1.28297  
neg scale -0.106887 1.36667 -1.23925  
neg scale -0.263975 1.37747 -1.30333  
neg scale -0.240791 1.41079 -1.28498  
neg scale -0.28995 1.42553 -1.30484  
neg scale -0.19218 1.4033 -1.26555

neg scale -0.334042 1.44741 -1.32388  
neg scale -0.253975 1.36004 -1.30464  
neg scale -0.0124992 1.36613 -1.20282  
neg scale -0.141835 1.39575 -1.24638  
neg scale -0.294793 1.43995 -1.30564  
neg scale -0.207356 1.34927 -1.28739  
neg scale -0.334527 1.4546 -1.32389  
neg scale -0.28596 1.35331 -1.32279  
neg scale -0.420848 1.49844 -1.3747  
neg scale -0.36737 1.47641 -1.34125  
neg scale -0.0996883 1.3955 -1.22977  
neg scale -0.15742 1.41025 -1.25012  
neg scale -0.0129551 1.32354 -1.21615  
neg scale -0.391409 1.49817 -1.3574  
neg scale -0.411939 1.51275 -1.3731  
neg scale -0.10914 1.40274 -1.23218  
neg scale -0.260266 1.44685 -1.28965  
neg scale -0.223808 1.32493 -1.30592  
neg scale -0.363952 1.49074 -1.34116  
neg scale -0.407066 1.51989 -1.37246  
neg scale -0.263295 1.45403 -1.29077  
neg scale -0.251904 1.31815 -1.32344  
neg scale -0.33415 1.48331 -1.32502  
neg scale -0.384375 1.51248 -1.35688  
neg scale -0.0704349 1.40246 -1.21733  
neg scale -0.302242 1.47583 -1.30902  
neg scale -0.33336 1.49043 -1.3255  
neg scale -0.184512 1.43913 -1.25795  
neg scale -0.15259 1.29633 -1.28797  
neg scale -0.268449 1.46841 -1.29319  
neg scale -0.143095 1.4316 -1.24188  
neg scale -0.0994102 1.28538 -1.27005  
neg scale -0.190255 1.44631 -1.25992

neg scale -0.180393 1.28954 -1.30535  
neg scale -0.100539 1.42412 -1.226  
neg scale -0.0441454 1.2744 -1.25198  
neg scale -0.105727 1.57744 -1.24725  
neg scale -0.110322 1.54986 -1.24015  
neg scale -0.0788944 1.53934 -1.22505  
neg scale -0.04474 1.52881 -1.20975  
neg scale -0.138608 1.53278 -1.24722  
neg scale -0.00821058 1.51826 -1.19433  
neg scale -0.105701 1.52225 -1.23193  
neg scale -0.0700403 1.51171 -1.21644  
neg scale -0.0319819 1.50116 -1.20084  
neg scale -0.128669 1.50515 -1.23818  
neg scale -0.0915046 1.4946 -1.22251  
neg scale -0.0519275 1.48403 -1.20672  
neg scale -0.147801 1.48803 -1.24382  
neg scale -0.0101732 1.47345 -1.19085  
neg scale -0.0356383 1.43907 -1.20047  
neg scale -0.222798 1.44709 -1.27345  
neg scale -0.0889258 1.43247 -1.22082  
neg scale -0.0545715 1.32443 -1.23237  
neg scale -0.066214 1.33179 -1.23426  
neg scale -0.139989 1.34678 -1.2591  
neg scale -0.0775916 1.33916 -1.23616  
neg scale -0.000202391 1.32417 -1.21092  
neg scale -0.149027 1.35409 -1.26035  
neg scale -0.214222 1.36896 -1.2835  
neg scale -0.0135646 1.33154 -1.21349  
neg scale -0.088716 1.3465 -1.23812  
neg scale -0.0267085 1.33888 -1.21611  
neg scale -0.0393662 1.34621 -1.21867  
neg scale -0.233386 1.39079 -1.28586  
neg scale -0.286301 1.40557 -1.30647

neg scale -0.239294 1.39805 -1.28679  
neg scale -0.258935 1.37119 -1.30301  
neg scale -0.190021 1.39054 -1.26726  
neg scale -0.00625523 1.35328 -1.20385  
neg scale -0.340189 1.44914 -1.32683  
neg scale -0.27884 1.347 -1.32206  
neg scale -0.42697 1.49299 -1.37728  
neg scale -0.445395 1.50757 -1.39288  
neg scale -0.0327351 1.36787 -1.21004  
neg scale -0.303181 1.44168 -1.30942  
neg scale -0.373897 1.47096 -1.34429  
neg scale -0.401213 1.48556 -1.36076  
neg scale -0.423396 1.50015 -1.37667  
neg scale -0.264197 1.43417 -1.29224  
neg scale -0.262585 1.32943 -1.32259  
neg scale -0.305798 1.44887 -1.31027  
neg scale -0.341982 1.46352 -1.32761  
neg scale -0.37308 1.47813 -1.34442  
neg scale -0.419507 1.50731 -1.37614  
neg scale -0.26826 1.44137 -1.29349  
neg scale -0.215808 1.31857 -1.30541  
neg scale -0.342579 1.47069 -1.32818  
neg scale -0.127346 1.40446 -1.23904  
neg scale -0.309953 1.4632 -1.31209  
neg scale -0.311222 1.31587 -1.35679  
neg scale -0.0809435 1.39694 -1.22227  
neg scale -0.234299 1.44112 -1.27865  
neg scale -0.194839 1.30088 -1.30533  
neg scale -0.0920451 1.40419 -1.22532  
neg scale -0.14588 1.4189 -1.24431  
neg scale -0.0610122 1.28582 -1.25294  
neg scale -0.0171985 1.63302 -1.23563  
neg scale -0.0617848 1.61594 -1.24563

neg scale -0.0400164 1.60542 -1.23164  
neg scale -0.0156208 1.59491 -1.21749  
neg scale -0.102738 1.59886 -1.25488  
neg scale -0.0882242 1.56076 -1.23447  
neg scale -0.0259258 1.53972 -1.20488  
neg scale -0.118901 1.54368 -1.24194  
neg scale -0.0175267 1.51209 -1.19686  
neg scale -0.200402 1.52004 -1.27004  
neg scale -0.168848 1.50952 -1.25496  
neg scale -0.188173 1.49238 -1.26058  
neg scale -0.152355 1.48184 -1.24514  
neg scale -0.0172035 1.46728 -1.19324  
neg scale -0.113891 1.47126 -1.22953  
neg scale -0.118143 1.32648 -1.2578  
neg scale -0.139074 1.34119 -1.26078  
neg scale -0.141768 1.4023 -1.24514  
neg scale -0.0782138 1.33356 -1.23845  
neg scale -0.00138294 1.31855 -1.21349  
neg scale -0.14903 1.34852 -1.26229  
neg scale -0.0467387 1.38092 -1.21235  
neg scale -0.0560513 1.34796 -1.22465  
neg scale -0.123746 1.36288 -1.24713  
neg scale -0.242579 1.39254 -1.28951  
neg scale -0.068784 1.3553 -1.2274  
neg scale -0.194398 1.38501 -1.27042  
neg scale -0.0127175 1.34771 -1.20793  
neg scale -0.144404 1.37744 -1.25153  
neg scale -0.343609 1.43647 -1.32937  
neg scale -0.435555 1.48037 -1.38049  
neg scale -0.455636 1.49498 -1.3963  
neg scale -0.0930224 1.36991 -1.23287  
neg scale -0.409136 1.47294 -1.36388  
neg scale -0.380319 1.4655 -1.34745

neg scale -0.407768 1.48012 -1.3638  
neg scale -0.181418 1.4065 -1.26051  
neg scale -0.0428644 1.30399 -1.23626  
neg scale -0.276103 1.43592 -1.29742  
neg scale -0.207859 1.31217 -1.30509  
neg scale -0.189657 1.41372 -1.26277  
neg scale -0.0765815 1.29717 -1.2537  
neg scale -0.0311983 1.62685 -1.23827  
neg scale -0.0108992 1.61634 -1.22471  
neg scale -0.149563 1.57562 -1.26505  
neg scale -0.00647966 1.55061 -1.20009  
neg scale -0.0365092 1.53355 -1.20757  
neg scale -0.234857 1.5244 -1.28596  
neg scale -0.0480263 1.48878 -1.20561  
neg scale -0.0241513 1.29842 -1.23113  
neg scale -0.0946014 1.42 -1.22417  
neg scale -0.184032 1.42401 -1.2591  
neg scale -0.0383029 1.30583 -1.23356  
neg scale -0.227386 1.41738 -1.27814  
neg scale -0.097041 1.40271 -1.22749  
neg scale -0.050244 1.39202 -1.21147  
neg scale -0.141964 1.39601 -1.24638  
neg scale -0.00265494 1.31294 -1.21619  
neg scale -0.272272 1.37276 -1.30873  
neg scale -0.09585 1.38534 -1.23031  
neg scale -0.183917 1.38937 -1.26497  
neg scale -0.278783 1.38004 -1.30948  
neg scale -0.138635 1.37865 -1.24888  
neg scale -0.103925 1.34266 -1.24561  
neg scale -0.169971 1.3576 -1.26803  
neg scale -0.330904 1.38006 -1.33512  
neg scale -0.115947 1.35001 -1.248  
neg scale -0.238302 1.37975 -1.29095

neg scale -0.04155 1.35718 -1.21625  
neg scale -0.290874 1.39454 -1.31114  
neg scale -0.189408 1.37218 -1.27176  
neg scale -0.245708 1.38702 -1.29228  
neg scale -0.0737966 1.34973 -1.2311  
neg scale -0.138832 1.36461 -1.25278  
neg scale -0.464029 1.48237 -1.39948  
neg scale -0.0189273 1.34213 -1.21204  
neg scale -0.0994963 1.36436 -1.23694  
neg scale -0.224002 1.40127 -1.27945  
neg scale -0.0563683 1.31528 -1.23684  
neg scale -0.272459 1.41597 -1.29822  
neg scale -0.141532 1.31936 -1.27103  
neg scale -0.123208 1.37891 -1.2426  
neg scale -0.180037 1.39371 -1.26239  
neg scale -0.00324347 1.30438 -1.22  
neg scale -0.0300931 1.65887 -1.25676  
neg scale -0.0626617 1.63122 -1.25414  
neg scale -0.0786792 1.53789 -1.22463  
neg scale -0.046911 1.52738 -1.2103  
neg scale -0.219508 1.44566 -1.27212  
neg scale -0.0873375 1.30046 -1.25665  
neg scale -0.00604898 1.28532 -1.23  
neg scale -0.17325 1.32293 -1.28345  
neg scale -0.100499 1.30787 -1.25867  
neg scale -0.0513951 1.30762 -1.23814  
neg scale -0.0987947 1.39645 -1.22925  
neg scale -0.185762 1.40045 -1.26341  
neg scale -0.265881 1.40448 -1.29732  
neg scale -0.337952 1.40851 -1.33082  
neg scale -0.2644 1.35989 -1.30962  
neg scale -0.142262 1.38977 -1.24777  
neg scale -0.36904 1.40185 -1.34858

neg scale -0.213711 1.35232 -1.28907  
neg scale -0.16086 1.34472 -1.26873  
neg scale -0.329972 1.38931 -1.33169  
neg scale -0.048692 1.36832 -1.21603  
neg scale -0.220435 1.37641 -1.28398  
neg scale -0.36296 1.38448 -1.35056  
neg scale -0.0351954 1.32211 -1.2255  
neg scale -0.286494 1.38176 -1.31261  
neg scale -0.182559 1.35934 -1.27284  
neg scale -0.240628 1.37422 -1.29364  
neg scale -0.192838 1.36663 -1.27491  
neg scale -0.00898833 1.32918 -1.21254  
neg scale -0.143366 1.35909 -1.25635  
neg scale -0.166147 1.37366 -1.26151  
neg scale -0.221506 1.3885 -1.28121  
neg scale -0.0173717 1.31569 -1.22093  
neg scale -0.118333 1.36609 -1.24401  
neg scale -0.0451757 1.65269 -1.25948  
neg scale -0.134396 1.61849 -1.27901  
neg scale -0.038975 1.60401 -1.2306  
neg scale -0.0166332 1.59347 -1.21734  
neg scale -0.0778233 1.58693 -1.2394  
neg scale -0.156106 1.5909 -1.27448  
neg scale -0.0540293 1.57639 -1.22593  
neg scale -0.272173 1.52258 -1.30245  
neg scale -0.186294 1.49095 -1.25965  
neg scale -0.264732 1.49493 -1.29378  
neg scale -0.0640306 1.47643 -1.21081  
neg scale -0.308314 1.48836 -1.31307  
neg scale -0.0251398 1.46585 -1.19611  
neg scale -0.320916 1.47121 -1.3176  
neg scale -0.129245 1.45264 -1.23535  
neg scale -0.213461 1.45664 -1.26928

neg scale -0.138 1.43543 -1.23957  
neg scale -0.0691369 1.2874 -1.2556  
neg scale -0.00410083 1.42079 -1.19033  
neg scale -0.0968196 1.4248 -1.22451  
neg scale -0.0835438 1.29484 -1.25789  
neg scale -0.00295548 1.27967 -1.2316  
neg scale -0.0535795 1.41415 -1.20933  
neg scale -0.0192841 1.28712 -1.23459  
neg scale -0.245505 1.33969 -1.30914  
neg scale -0.33549 1.40224 -1.33101  
neg scale -0.137431 1.32444 -1.26694  
neg scale -0.203358 1.33941 -1.28962  
neg scale -0.263493 1.35434 -1.31139  
neg scale -0.298915 1.39155 -1.31575  
neg scale -0.0803766 1.31678 -1.2461  
neg scale -0.00548056 1.30169 -1.22207  
neg scale -0.149858 1.3318 -1.26914  
neg scale -0.324329 1.37652 -1.33298  
neg scale -0.00690543 1.36873 -1.20009  
neg scale -0.392519 1.38892 -1.36561  
neg scale -0.0219969 1.30912 -1.2255  
neg scale -0.0946395 1.32414 -1.24891  
neg scale -0.223952 1.35408 -1.29304  
neg scale -0.28017 1.36895 -1.3138  
neg scale -0.108521 1.33149 -1.25171  
neg scale -0.233645 1.36139 -1.29475  
neg scale -0.336654 1.39106 -1.33458  
neg scale -0.0902149 1.3553 -1.2359  
neg scale -0.0536619 1.32389 -1.23222  
neg scale -0.302648 1.39076 -1.31776  
neg scale -0.0800165 1.33778 -1.23763  
neg scale -0.083578 1.33858 -1.23879  
neg scale -0.260773 1.38322 -1.30015

neg scale -0.0302327 1.32695 -1.22169  
neg scale -0.0120974 1.66363 -1.25185  
neg scale -0.0466303 1.63596 -1.24985  
neg scale -0.0305042 1.62544 -1.23725  
neg scale -0.0728228 1.60835 -1.24661  
neg scale -0.0528608 1.59783 -1.23362  
neg scale -0.255714 1.53351 -1.29776  
neg scale -0.174546 1.50189 -1.25615  
neg scale -0.0550607 1.48738 -1.20812  
neg scale -0.0181167 1.47681 -1.19388  
neg scale -0.337841 1.49272 -1.32806  
neg scale -0.0852431 1.45306 -1.21845  
neg scale -0.0168285 1.25928 -1.24903  
neg scale -0.045333 1.44244 -1.20388  
neg scale -0.00363311 1.43182 -1.18923  
neg scale -0.259373 1.44381 -1.2894  
neg scale -0.0534814 1.42518 -1.2081  
neg scale -0.22385 1.43318 -1.27479  
neg scale -0.141007 1.29691 -1.28231  
neg scale -0.264154 1.42658 -1.29301  
neg scale -0.397652 1.43458 -1.35806  
neg scale -0.0799231 1.28919 -1.25932  
neg scale -8.08739e-05 1.274 -1.23339  
neg scale -0.368146 1.42395 -1.3435  
neg scale -0.179033 1.3191 -1.28793  
neg scale -0.242968 1.33411 -1.31056  
neg scale -0.300901 1.34905 -1.33227  
neg scale -0.226949 1.39858 -1.28128  
neg scale -0.123294 1.31144 -1.26682  
neg scale -0.0499823 1.29633 -1.24284  
neg scale -0.191074 1.32648 -1.28986  
neg scale -0.308995 1.35636 -1.33311  
neg scale -0.186105 1.38794 -1.26622

neg scale -0.263155 1.39195 -1.29891  
neg scale -0.419593 1.39333 -1.38029  
neg scale -0.0812315 1.31116 -1.24895  
neg scale -0.00699778 1.29608 -1.22522  
neg scale -0.150346 1.3262 -1.27178  
neg scale -0.213883 1.34117 -1.29366  
neg scale -0.324228 1.37096 -1.33497  
neg scale -0.00953771 1.3624 -1.20264  
neg scale -0.370859 1.3858 -1.35444  
neg scale -0.0978827 1.36647 -1.23571  
neg scale -0.37627 1.39306 -1.35504  
neg scale -0.136298 1.35976 -1.25321  
neg scale -0.175706 1.34089 -1.27667  
neg scale -0.338201 1.38551 -1.33708  
neg scale -0.0898844 1.34898 -1.23777  
neg scale -0.0571752 1.31828 -1.23591  
neg scale -0.187814 1.34821 -1.27912  
neg scale -0.0284729 1.65744 -1.25508  
neg scale -0.0160846 1.6469 -1.243  
neg scale -0.188328 1.55097 -1.273  
neg scale -0.08325 1.53649 -1.22609  
neg scale -0.137782 1.52992 -1.24624  
neg scale -0.078145 1.50885 -1.21912  
neg scale -0.283785 1.51024 -1.30507  
neg scale -0.00992081 1.48776 -1.19153  
neg scale -0.229272 1.48912 -1.27752  
neg scale -0.0276233 1.47061 -1.19712  
neg scale -0.079805 1.46403 -1.21637  
neg scale -0.129555 1.45742 -1.23541  
neg scale -0.211278 1.46138 -1.26836  
neg scale -0.00197791 1.44282 -1.188  
neg scale -0.0918801 1.44681 -1.22114  
neg scale -0.387724 1.46278 -1.35136

neg scale -0.0522542 1.43622 -1.20678  
neg scale -0.294551 1.44818 -1.30507  
neg scale -0.122075 1.2838 -1.28128  
neg scale -0.145763 1.42298 -1.24378  
neg scale -0.10514 1.41231 -1.22918  
neg scale -0.396611 1.42834 -1.35828  
neg scale -0.217927 1.31376 -1.30907  
neg scale -0.148366 1.40566 -1.24721  
neg scale -0.0923218 1.29098 -1.26377  
neg scale -0.163735 1.3061 -1.28766  
neg scale -0.229467 1.32114 -1.31064  
neg scale -0.106437 1.39499 -1.2325  
neg scale -0.189118 1.39902 -1.26508  
neg scale -0.265273 1.40302 -1.29735  
neg scale -0.176941 1.3135 -1.28982  
neg scale -0.032514 1.28325 -1.24213  
neg scale -0.226958 1.39234 -1.28267  
neg scale -0.421544 1.40441 -1.37794  
neg scale -0.307397 1.35081 -1.3348  
neg scale -0.202034 1.32825 -1.29405  
neg scale -0.0591435 1.36686 -1.22043  
neg scale -0.364378 1.373 -1.35567  
neg scale -0.40713 1.38782 -1.37466  
neg scale -0.143358 1.3709 -1.25284  
neg scale -0.222095 1.37497 -1.28514  
neg scale -0.214098 1.33559 -1.29622  
neg scale -0.271975 1.35054 -1.31709  
neg scale -0.0986073 1.36017 -1.23779  
neg scale -0.370886 1.38028 -1.35644  
neg scale -0.225674 1.34292 -1.29835  
neg scale -0.132522 1.61706 -1.27733  
neg scale -0.268946 1.58687 -1.3265  
neg scale -0.0348364 1.56448 -1.21461

neg scale -0.09209 1.5579 -1.23515  
neg scale -0.0664922 1.5474 -1.22219  
neg scale -0.284783 1.55927 -1.32085  
neg scale -0.121715 1.54082 -1.24234  
neg scale -0.197865 1.5448 -1.27522  
neg scale -0.00899595 1.52635 -1.19595  
neg scale -0.0946116 1.53032 -1.22919  
neg scale -0.291721 1.53168 -1.31422  
neg scale -0.197932 1.51717 -1.26841  
neg scale -0.055524 1.49213 -1.20869  
neg scale -0.0208117 1.48157 -1.1951  
neg scale -0.0877264 1.45782 -1.21934  
neg scale -0.135763 1.45121 -1.23793  
neg scale -0.0694049 1.25565 -1.27508  
neg scale -0.0984242 1.44059 -1.22391  
neg scale -0.0855625 1.26316 -1.27752  
neg scale -0.296768 1.44197 -1.30642  
neg scale -0.187896 1.42736 -1.26033  
neg scale -0.332619 1.43534 -1.32403  
neg scale -0.365666 1.42875 -1.34151  
neg scale -0.42259 1.43274 -1.37267  
neg scale -0.201398 1.30074 -1.30862  
neg scale -0.131922 1.2856 -1.28474  
neg scale -0.109246 1.40606 -1.23169  
neg scale -0.190921 1.41008 -1.26385  
neg scale -0.334574 1.41809 -1.32729  
neg scale -0.151134 1.3994 -1.24942  
neg scale -0.161007 1.30045 -1.28953  
neg scale -0.0898488 1.28531 -1.26583  
neg scale -0.23836 1.32291 -1.31403  
neg scale -0.348089 1.35283 -1.35577  
neg scale -0.305784 1.34524 -1.33664  
neg scale -0.0840237 1.67674 -1.2962

neg scale -0.116406 1.63851 -1.28304  
neg scale -0.1763 1.64247 -1.31574  
neg scale -0.0916698 1.61743 -1.25926  
neg scale -0.0757776 1.60692 -1.24718  
neg scale -0.0578354 1.5964 -1.23506  
neg scale -0.0375287 1.58589 -1.22276  
neg scale -0.245474 1.59777 -1.32071  
neg scale -0.0488481 1.55831 -1.21826  
neg scale -0.127798 1.56224 -1.25103  
neg scale -0.0228557 1.54778 -1.20557  
neg scale -0.104551 1.55174 -1.23836  
neg scale -0.248136 1.55968 -1.30316  
neg scale -0.0791241 1.54123 -1.22558  
neg scale -0.23171 1.52154 -1.28391  
neg scale -0.377136 1.51238 -1.3528  
neg scale -0.0658557 1.48594 -1.21205  
neg scale -0.148724 1.48992 -1.24436  
neg scale -0.0315285 1.47537 -1.19872  
neg scale -0.196252 1.48333 -1.26307  
neg scale -0.393009 1.49527 -1.35773  
neg scale -0.0824446 1.46879 -1.21745  
neg scale -0.164779 1.47278 -1.2496  
neg scale -0.240966 1.47672 -1.28152  
neg scale -0.0465991 1.4582 -1.20395  
neg scale -0.210226 1.46617 -1.26799  
neg scale -0.00868302 1.44759 -1.19026  
neg scale -0.252875 1.45956 -1.28614  
neg scale -0.292518 1.45296 -1.30398  
neg scale -0.0619553 1.24994 -1.27558  
neg scale -0.442761 1.45433 -1.38343  
neg scale -0.0661071 1.42375 -1.21296  
neg scale -0.298834 1.43574 -1.30786  
neg scale -0.419779 1.44375 -1.3699

neg scale -0.333672 1.42911 -1.32523  
neg scale -0.248336 1.30279 -1.3311  
neg scale -0.111925 1.27245 -1.28368  
neg scale -0.0705391 1.40644 -1.21676  
neg scale -0.365419 1.42247 -1.3423  
neg scale -0.260225 1.31019 -1.33256  
neg scale -0.0529083 1.26471 -1.26164  
neg scale -0.336798 1.33993 -1.35632  
neg scale -0.0501001 1.7195 -1.32089  
neg scale -0.0505243 1.68772 -1.28872  
neg scale -0.046258 1.67712 -1.2777  
neg scale -0.103281 1.6811 -1.31025  
neg scale -0.100165 1.67054 -1.29917  
neg scale -0.146624 1.65342 -1.30896  
neg scale -0.064923 1.62835 -1.25352  
neg scale -0.0506726 1.61783 -1.24188  
neg scale -0.23651 1.62974 -1.33835  
neg scale -0.172025 1.61523 -1.29477  
neg scale -0.0908059 1.60074 -1.25067  
neg scale -0.209506 1.59817 -1.30296  
neg scale -0.195573 1.58763 -1.29087  
neg scale -0.256444 1.5916 -1.32272  
neg scale -0.243622 1.58109 -1.3106  
neg scale -0.140035 1.5561 -1.25413  
neg scale -0.257656 1.55351 -1.30529  
neg scale -0.368279 1.56141 -1.36777  
neg scale -0.00922732 1.5311 -1.1969  
neg scale -0.16845 1.53902 -1.26105  
neg scale -0.0642588 1.52452 -1.21635  
neg scale -0.116946 1.51797 -1.23557  
neg scale -0.363834 1.52331 -1.34867  
neg scale -0.0573961 1.49688 -1.20984  
neg scale -0.138822 1.50086 -1.24163

neg scale -0.283694 1.50878 -1.30474  
neg scale -0.0246489 1.48631 -1.19681  
neg scale -0.0762158 1.47975 -1.21555  
neg scale -0.232486 1.4877 -1.27875  
neg scale -0.362125 1.49565 -1.341  
neg scale -0.12528 1.47315 -1.23401  
neg scale -0.27505 1.48108 -1.29691  
neg scale -0.456404 1.47589 -1.39337  
neg scale -0.183144 1.44939 -1.2569  
neg scale -0.295884 1.44673 -1.30574  
neg scale -0.147604 1.26705 -1.30457  
neg scale -0.154458 1.42152 -1.24741  
neg scale -0.0164837 1.7199 -1.30221  
neg scale -0.0175106 1.70928 -1.2918  
neg scale -0.0675371 1.71328 -1.32386  
neg scale -0.0164451 1.69868 -1.28127  
neg scale -0.069828 1.70268 -1.31342  
neg scale -0.0132016 1.68809 -1.27057  
neg scale -0.0483655 1.64982 -1.25905  
neg scale -0.0376865 1.63927 -1.24788  
neg scale -0.203466 1.63012 -1.32059  
neg scale -0.253212 1.63408 -1.35181  
neg scale -0.0667484 1.61168 -1.24564  
neg scale -0.0502511 1.60115 -1.23397  
neg scale -0.0876041 1.58407 -1.24229  
neg scale -0.2777 1.59597 -1.33666  
neg scale -0.14096 1.57751 -1.26211  
neg scale -0.17298 1.56044 -1.26951  
neg scale -0.152151 1.54993 -1.2573  
neg scale -0.0508912 1.53543 -1.21341  
neg scale -0.325426 1.55128 -1.33842  
neg scale -0.247964 1.53679 -1.29516  
neg scale -0.0769128 1.51834 -1.2201

neg scale -0.349333 1.5342 -1.34447  
neg scale -0.271006 1.5197 -1.30121  
neg scale -0.0994519 1.50123 -1.22629  
neg scale -0.176703 1.5052 -1.25751  
neg scale -0.248167 1.50917 -1.28865  
neg scale -0.312634 1.51313 -1.31947  
neg scale -0.369776 1.51711 -1.35005  
neg scale -0.148632 1.49467 -1.2448  
neg scale -0.266194 1.49205 -1.29406  
neg scale -0.0863907 1.47355 -1.2191  
neg scale -0.133996 1.46695 -1.23722  
neg scale -0.210261 1.47093 -1.26816  
neg scale -0.280688 1.47491 -1.29901  
neg scale -0.448504 1.48685 -1.3898  
neg scale -0.319016 1.46832 -1.31655  
neg scale -0.189076 1.44314 -1.25959  
neg scale -0.261834 1.44714 -1.29033  
neg scale -0.107715 1.2463 -1.30041  
neg scale -0.0737764 1.42853 -1.21541  
neg scale -0.229695 1.43654 -1.277  
neg scale -0.124671 1.25383 -1.30302  
neg scale -0.0481506 1.23847 -1.27741  
neg scale -0.066723 1.24602 -1.28065  
neg scale -0.22415 1.28405 -1.33144  
neg scale -0.15729 1.26886 -1.30809  
neg scale -0.285155 1.29921 -1.3538  
neg scale -0.0848741 1.25357 -1.28381  
neg scale -0.0317166 1.68188 -1.27447  
neg scale -0.00963347 1.65022 -1.24219  
neg scale -0.0656864 1.64362 -1.26291  
neg scale -0.0419595 1.62258 -1.2406  
neg scale -0.109101 1.62651 -1.27212  
neg scale -0.169288 1.63049 -1.3033

neg scale -0.00998995 1.60152 -1.21789  
neg scale -0.149125 1.60945 -1.2807  
neg scale -0.135799 1.59893 -1.26928  
neg scale -0.186031 1.59237 -1.28878  
neg scale -0.335914 1.59373 -1.36906  
neg scale -0.0050749 1.56342 -1.20292  
neg scale -0.219583 1.57529 -1.29631  
neg scale -0.366103 1.57666 -1.37591  
neg scale -0.113499 1.55031 -1.24155  
neg scale -0.184902 1.55427 -1.27258  
neg scale -0.0372174 1.51873 -1.20516  
neg scale -0.116193 1.5227 -1.23614  
neg scale -0.257411 1.53061 -1.29773  
neg scale -0.0893674 1.51216 -1.22389  
neg scale -0.0800444 1.48449 -1.21729  
neg scale -0.230971 1.49246 -1.27862  
neg scale -0.0477538 1.47394 -1.20465  
neg scale -0.203514 1.48188 -1.26597  
neg scale -0.0962511 1.46734 -1.22266  
neg scale -0.217259 1.46472 -1.27091  
neg scale -0.156317 1.24839 -1.32383  
neg scale -0.172452 1.25594 -1.32605  
neg scale -0.100062 1.24058 -1.30116  
neg scale -0.0542054 1.69683 -1.29903  
neg scale -0.0531816 1.68625 -1.28877  
neg scale -0.0499516 1.67568 -1.27834  
neg scale -0.151243 1.68366 -1.34016  
neg scale -0.0374432 1.65457 -1.25722  
neg scale -0.239251 1.65992 -1.3693  
neg scale -0.19507 1.64541 -1.32826  
neg scale -0.190548 1.63488 -1.31736  
neg scale -0.0272499 1.59537 -1.22229  
neg scale -0.0821311 1.5888 -1.24191

neg scale -0.150181 1.59276 -1.27271  
neg scale -0.211737 1.59671 -1.30324  
neg scale -0.199259 1.58619 -1.29189  
neg scale -0.12673 1.54413 -1.24522  
neg scale -0.366414 1.55999 -1.36585  
neg scale -0.407982 1.56395 -1.39529  
neg scale -0.103466 1.53362 -1.23337  
neg scale -0.302552 1.5455 -1.32424  
neg scale -0.355384 1.54946 -1.35409  
neg scale -0.39072 1.54291 -1.37189  
neg scale -0.022005 1.50202 -1.19726  
neg scale -0.345995 1.51132 -1.33583  
neg scale -0.304136 1.49024 -1.31132  
neg scale -0.0149088 1.72909 -1.31168  
neg scale -0.0208077 1.70784 -1.29211  
neg scale -0.109134 1.71583 -1.35312  
neg scale -0.0207103 1.69724 -1.28212  
neg scale -0.115258 1.70522 -1.34323  
neg scale -0.0724439 1.69062 -1.30275  
neg scale -0.00855768 1.66552 -1.25155  
neg scale -0.205889 1.68142 -1.37293  
neg scale -0.000391912 1.65497 -1.24109  
neg scale -0.0628925 1.65894 -1.2719  
neg scale -0.168097 1.6669 -1.33267  
neg scale -0.210126 1.67086 -1.36268  
neg scale -0.0555312 1.6484 -1.26137  
neg scale -0.114478 1.65236 -1.29188  
neg scale -0.253027 1.65373 -1.3715  
neg scale -0.290906 1.64714 -1.39048  
neg scale -0.0213183 1.61679 -1.22918  
neg scale -0.292959 1.63661 -1.37982  
neg scale -0.0759919 1.61022 -1.24885  
neg scale -0.128196 1.60368 -1.26825

neg scale -0.14872 1.57608 -1.26487  
neg scale -0.389959 1.57484 -1.39049  
neg scale -0.161092 1.5485 -1.26061  
neg scale -0.338468 1.56035 -1.34979  
neg scale -0.0659897 1.53399 -1.21888  
neg scale -0.0404629 1.52349 -1.20717  
neg scale -0.34998 1.53276 -1.34431  
neg scale -0.0643781 1.50639 -1.21356  
neg scale -0.140301 1.51034 -1.24356  
neg scale -0.275677 1.51829 -1.30305  
neg scale -0.00514476 1.48528 -1.18962  
neg scale -0.0551976 1.74816 -1.36436  
neg scale -0.0816833 1.71623 -1.33599  
neg scale -0.13232 1.699 -1.34633  
neg scale -0.0338432 1.66988 -1.26622  
neg scale -0.214698 1.68581 -1.38544  
neg scale -0.0277072 1.65932 -1.25598  
neg scale -0.0860998 1.6633 -1.28625  
neg scale -0.13794 1.66726 -1.3162  
neg scale -0.220921 1.67522 -1.37542  
neg scale -0.0197555 1.64878 -1.24572  
neg scale -0.0807966 1.65276 -1.27595  
neg scale -0.224944 1.66466 -1.36524  
neg scale -0.0734509 1.64222 -1.26554  
neg scale -0.263745 1.65809 -1.38417  
neg scale -0.178957 1.63959 -1.31489  
neg scale -0.22644 1.64357 -1.34451  
neg scale -0.267518 1.63699 -1.36337  
neg scale -0.165588 1.61855 -1.2937  
neg scale -0.0242781 1.6001 -1.22301  
neg scale -0.0926687 1.60407 -1.25301  
neg scale -0.155628 1.60802 -1.28291  
neg scale -0.00707383 1.58956 -1.21212

neg scale -0.0780089 1.59353 -1.24216  
neg scale -0.143485 1.5975 -1.27199  
neg scale -0.23766 1.58438 -1.30934  
neg scale -0.290114 1.58833 -1.33866  
neg scale -0.022112 1.562 -1.20901  
neg scale -0.329215 1.58177 -1.35669  
neg scale -0.210063 1.56337 -1.28698  
neg scale -0.0529179 1.54492 -1.21633  
neg scale -0.193047 1.55283 -1.27565  
neg scale -0.0291926 1.53441 -1.20499  
neg scale -0.00360948 1.52386 -1.19354  
neg scale -0.280957 1.53972 -1.31156  
neg scale -0.129643 1.52126 -1.2412  
neg scale -0.199173 1.52523 -1.27065  
neg scale -0.0280188 1.50676 -1.20003  
neg scale -0.176661 1.51468 -1.25906  
neg scale -0.0490789 1.48963 -1.20607  
neg scale -0.00712687 1.71261 -1.28963  
neg scale -0.00807204 1.70201 -1.28006  
neg scale -0.135581 1.71398 -1.36879  
neg scale -0.00709384 1.69142 -1.27037  
neg scale -0.0591443 1.69538 -1.30025  
neg scale -0.104523 1.69939 -1.32979  
neg scale -0.0528013 1.66371 -1.27059  
neg scale -0.154868 1.67162 -1.32973  
neg scale -0.195855 1.67562 -1.35895  
neg scale -0.103824 1.65711 -1.29021  
neg scale -0.154529 1.66107 -1.31966  
neg scale -0.198626 1.66506 -1.34893  
neg scale -0.0387775 1.64259 -1.2503  
neg scale -0.147765 1.64 -1.29929  
neg scale -0.188644 1.6229 -1.30782  
neg scale -0.233304 1.61633 -1.32643

|           |             |           |          |           |
|-----------|-------------|-----------|----------|-----------|
| neg scale | -0.217163   | 1.59529   | -1.3051  |           |
| neg scale | -0.260876   | 1.58872   | -1.32336 |           |
| neg scale | -0.0390568  | 1.55583   | -1.21379 |           |
| neg scale | -0.0169029  | 1.54532   | -1.20275 |           |
| neg scale | -0.0903469  | 1.54926   | -1.23202 |           |
| neg scale | -0.0722637  | 1.71037   | -1.32328 |           |
| neg scale | -0.0280521  | 1.69579   | -1.28453 |           |
| neg scale | -0.0777779  | 1.67862   | -1.29464 |           |
| neg scale | -0.0756531  | 1.66806   | -1.28485 |           |
| neg scale | -0.115974   | 1.64038   | -1.28409 |           |
| neg scale | -0.0222712  | 1.60483   | -1.22419 |           |
| neg scale | -0.0882962  | 1.60878   | -1.2534  |           |
| neg scale | -0.148839   | 1.61275   | -1.2824  |           |
| neg scale | -0.00687885 | 1.59432   | -1.21382 |           |
| neg scale | -0.00365284 | 1.55622   | -1.20044 |           |
| neg scale | -0.0757957  | 1.56019   | -1.22935 |           |
| neg scale | -0.0017462  | 1.61574   | -1.22072 |           |
| neg scale | -0.0546187  | 1.60917   | -1.23936 |           |
| neg scale | -0.0409788  | 1.59868   | -1.22915 |           |
| #1        | -57790.163  | 21070.534 |          | 21070.534 |
| neg scale | -0.00198414 | 1.53274   | -1.38533 |           |
| neg scale | -0.00191674 | 1.5544    | -1.39861 |           |
| neg scale | -0.00342168 | 1.49844   | -1.3747  |           |
| neg scale | -0.00674714 | 1.49299   | -1.37728 |           |
| neg scale | -0.0166612  | 1.50757   | -1.39288 |           |
| neg scale | -0.00481881 | 1.50015   | -1.37667 |           |
| neg scale | -0.00266003 | 1.50731   | -1.37614 |           |
| neg scale | -0.0112489  | 1.48037   | -1.38049 |           |
| neg scale | -0.0222034  | 1.49498   | -1.3963  |           |
| neg scale | -0.0265482  | 1.48237   | -1.39948 |           |
| neg scale | -0.00188367 | 1.43274   | -1.37267 |           |
| neg scale | -0.0142245  | 1.45433   | -1.38343 |           |
| neg scale | -0.00108452 | 1.44375   | -1.3699  |           |

neg scale -0.022375 1.47589 -1.39337

neg scale -0.0183496 1.48685 -1.3898

#2 -63737.192 15123.505 -5947.029

\$TEXT:Warning:\$ \$ \$

WARNING: 1457 observations had a negative secondary scale, so parameters were scaled down

\$ \$

Scale parameters:

Run 1

Primary scales and number of observations

|         |       |       |       |       |       |       |       |       |
|---------|-------|-------|-------|-------|-------|-------|-------|-------|
| Scales: | 0.936 | 1.000 | 1.058 | 1.164 | 1.243 | 1.255 | 1.288 | 1.299 |
| 1.327   | 1.327 |       |       |       |       |       |       |       |
| Sd:     | 0.012 | 0.005 | 0.004 | 0.004 | 0.004 | 0.004 | 0.004 | 0.004 |
| 0.004   | 0.004 |       |       |       |       |       |       |       |
| Nobs:   | 5524  | 11161 | 16718 | 16861 | 16792 | 16779 | 16726 | 16822 |
| 16780   | 16860 |       |       |       |       |       |       |       |

|         |       |       |       |       |       |       |       |       |
|---------|-------|-------|-------|-------|-------|-------|-------|-------|
| Scales: | 1.317 | 1.360 | 1.365 | 1.363 | 1.404 | 1.379 | 1.303 | 1.185 |
| 1.077   | 1.136 |       |       |       |       |       |       |       |
| Sd:     | 0.004 | 0.005 | 0.005 | 0.005 | 0.005 | 0.006 | 0.006 | 0.005 |
| 0.006   | 0.018 |       |       |       |       |       |       |       |
| Nobs:   | 16745 | 16618 | 16159 | 15820 | 15755 | 15380 | 15012 | 14289 |
| 9429    | 4587  |       |       |       |       |       |       |       |

Relative B-factors and number of observations

|            |        |        |        |        |       |        |
|------------|--------|--------|--------|--------|-------|--------|
| B-factors: | -4.949 | -0.878 | -1.738 | -2.038 | 0.000 | -7.056 |
| Sd:        | 0.114  | 0.036  | 0.029  | 0.031  | 0.042 | 0.138  |
| Nobs:      | 25180  | 50277  | 74734  | 71759  | 46662 | 22205  |

Run 2

Primary scales and number of observations

|         |       |       |       |       |       |       |       |       |
|---------|-------|-------|-------|-------|-------|-------|-------|-------|
| Scales: | 2.001 | 1.478 | 1.277 | 1.095 | 1.137 | 1.107 | 1.108 | 1.109 |
|         | 1.142 | 1.151 |       |       |       |       |       |       |
| Sd:     | 0.039 | 0.008 | 0.004 | 0.003 | 0.003 | 0.003 | 0.003 | 0.003 |
|         | 0.003 | 0.004 |       |       |       |       |       |       |
| Nobs:   | 5440  | 10828 | 16064 | 15790 | 15352 | 15112 | 14796 | 14722 |
|         | 14667 | 14546 |       |       |       |       |       |       |

|         |       |       |       |       |       |       |       |
|---------|-------|-------|-------|-------|-------|-------|-------|
| Scales: | 1.138 | 1.088 | 1.083 | 1.035 | 1.010 | 0.943 | 0.999 |
| Sd:     | 0.004 | 0.004 | 0.004 | 0.004 | 0.004 | 0.005 | 0.017 |
| Nobs:   | 14387 | 14112 | 14158 | 14243 | 14397 | 9622  | 4820  |

Relative B-factors and number of observations

|            |        |        |        |        |        |         |
|------------|--------|--------|--------|--------|--------|---------|
| B-factors: | -3.760 | -0.901 | -1.570 | -1.025 | -2.158 | -10.657 |
| Sd:        | 0.141  | 0.034  | 0.026  | 0.031  | 0.041  | 0.149   |
| Nobs:      | 19974  | 38465  | 56429  | 54378  | 35887  | 17923   |

Secondary scales

Scale set 1 used for runs 1, 2

|                  |             |             |             |             |             |
|------------------|-------------|-------------|-------------|-------------|-------------|
| Coefficient(Sd): | 0.0193(21)  | 0.0439(18)  | -0.0053(19) | 0.0716(17)  | 0.0173(16)  |
|                  | 0.0071(19)  |             |             |             |             |
| Coefficient(Sd): | 0.0091(19)  | 0.0154(20)  | 0.0228(15)  | -0.0426(15) | 0.0302(17)  |
|                  | 0.0077(16)  |             |             |             |             |
| Coefficient(Sd): | -0.0181(19) | -0.0335(19) | 0.0143(16)  | -0.0585(8)  | 0.0020(9)   |
|                  | -0.0109(10) |             |             |             |             |
| Coefficient(Sd): | -0.0124(9)  | -0.0478(13) | -0.0060(12) | -0.0035(15) | -0.0139(15) |
|                  | -0.0183(13) |             |             |             |             |

[illegible]

|     |   |   |   |   |   |      |      |      |      |      |      |      |      |   |   |   |
|-----|---|---|---|---|---|------|------|------|------|------|------|------|------|---|---|---|
| 80  | - | - | - | - | - | -    | -    | -    | -    | -    | -    | -    | -    | - | - | - |
| -   | - |   |   |   |   |      |      |      |      |      |      |      |      |   |   |   |
| 90  | - | - | - | - | - | -    | -    | -    | 1.13 | 1.15 | -    | -    | -    | - | - | - |
| -   | - |   |   |   |   |      |      |      |      |      |      |      |      |   |   |   |
| 100 | - | - | - | - | - | -    | 1.02 | 1.07 | 1.11 | 1.12 | 1.08 | 1.02 | -    | - | - | - |
| -   | - |   |   |   |   |      |      |      |      |      |      |      |      |   |   |   |
| 110 | - | - | - | - | - | 0.99 | 1.01 | 1.04 | 1.06 | 1.06 | 1.03 | 0.97 | 0.93 | - | - | - |
| -   | - |   |   |   |   |      |      |      |      |      |      |      |      |   |   |   |
| 120 | - | - | - | - | - | 0.99 | 1.00 | 1.01 | 1.02 | 1.00 | 0.97 | 0.93 | 0.90 | - | - | - |
| -   | - |   |   |   |   |      |      |      |      |      |      |      |      |   |   |   |
| 130 | - | - | - | - | - | 0.99 | 0.99 | 0.99 | 0.99 | 0.97 | 0.94 | 0.92 | 0.90 | - | - | - |
| -   | - |   |   |   |   |      |      |      |      |      |      |      |      |   |   |   |
| 140 | - | - | - | - | - | 1.00 | 1.00 | 1.00 | 0.99 | 0.97 | 0.95 | 0.93 | 0.92 | - | - | - |
| -   | - |   |   |   |   |      |      |      |      |      |      |      |      |   |   |   |
| 150 | - | - | - | - | - | 1.01 | 1.02 | 1.02 | 1.01 | 1.00 | 0.99 | 0.97 | 0.97 | - | - | - |
| -   | - |   |   |   |   |      |      |      |      |      |      |      |      |   |   |   |
| 160 | - | - | - | - | - | 1.02 | 1.03 | 1.04 | 1.04 | 1.04 | 1.03 | 1.03 | 1.02 | - | - | - |
| -   | - |   |   |   |   |      |      |      |      |      |      |      |      |   |   |   |
| 170 | - | - | - | - | - | 1.02 | 1.03 | 1.05 | 1.06 | 1.07 | 1.07 | 1.07 | 1.06 | - | - | - |
| -   | - |   |   |   |   |      |      |      |      |      |      |      |      |   |   |   |
| 180 | - | - | - | - | - | 1.00 | 1.01 | 1.03 | 1.04 | 1.06 | 1.06 | 1.07 | 1.06 | - | - | - |
| -   | - |   |   |   |   |      |      |      |      |      |      |      |      |   |   |   |
| 190 | - | - | - | - | - | 0.97 | 0.98 | 0.99 | 1.00 | 1.01 | 1.02 | 1.03 | 1.03 | - | - | - |
| -   | - |   |   |   |   |      |      |      |      |      |      |      |      |   |   |   |
| 200 | - | - | - | - | - | 0.94 | 0.94 | 0.94 | 0.95 | 0.95 | 0.96 | 0.97 | 0.98 | - | - | - |
| -   | - |   |   |   |   |      |      |      |      |      |      |      |      |   |   |   |
| 210 | - | - | - | - | - | 0.92 | 0.92 | 0.92 | 0.92 | 0.91 | 0.91 | 0.92 | 0.93 | - | - | - |
| -   | - |   |   |   |   |      |      |      |      |      |      |      |      |   |   |   |
| 220 | - | - | - | - | - | 0.93 | 0.93 | 0.94 | 0.93 | 0.92 | 0.91 | 0.90 | 0.90 | - | - | - |
| -   | - |   |   |   |   |      |      |      |      |      |      |      |      |   |   |   |
| 230 | - | - | - | - | - | 0.95 | 0.98 | 1.00 | 1.01 | 0.99 | 0.95 | 0.92 | 0.90 | - | - | - |
| -   | - |   |   |   |   |      |      |      |      |      |      |      |      |   |   |   |
| 240 | - | - | - | - | - | 1.00 | 1.07 | 1.13 | 1.16 | 1.13 | 1.06 | 0.98 | 0.92 | - | - | - |

|     |   |   |   |   |   |   |      |      |      |      |      |      |   |   |   |   |
|-----|---|---|---|---|---|---|------|------|------|------|------|------|---|---|---|---|
| 250 | - | - | - | - | - | - | 1.19 | 1.32 | 1.39 | 1.35 | 1.22 | 1.08 | - | - | - | - |
| 260 | - | - | - | - | - | - | -    | -    | 1.67 | 1.62 | -    | -    | - | - | - | - |
| 270 | - | - | - | - | - | - | -    | -    | -    | -    | -    | -    | - | - | - | - |
| 280 | - | - | - | - | - | - | -    | -    | -    | -    | -    | -    | - | - | - | - |
| 290 | - | - | - | - | - | - | -    | -    | -    | -    | -    | -    | - | - | - | - |
| 300 | - | - | - | - | - | - | -    | -    | -    | -    | -    | -    | - | - | - | - |
| 310 | - | - | - | - | - | - | -    | -    | -    | -    | -    | -    | - | - | - | - |
| 320 | - | - | - | - | - | - | -    | -    | -    | -    | -    | -    | - | - | - | - |
| 330 | - | - | - | - | - | - | -    | -    | -    | -    | -    | -    | - | - | - | - |
| 340 | - | - | - | - | - | - | -    | -    | -    | -    | -    | -    | - | - | - | - |
| 350 | - | - | - | - | - | - | -    | -    | -    | -    | -    | -    | - | - | - | - |

\$TABLE: Histogram of secondary corrections:

\$GRAPHS:Histogram of secondary corrections:N:2,3:

\$\$

| N | SecScale | Number | \$\$ | \$\$ |
|---|----------|--------|------|------|
| 1 | 0.70     | 1492   |      |      |
| 2 | 0.72     | 1732   |      |      |
| 3 | 0.74     | 1971   |      |      |
| 4 | 0.76     | 2183   |      |      |

|    |      |        |
|----|------|--------|
| 5  | 0.78 | 2365   |
| 6  | 0.80 | 2564   |
| 7  | 0.82 | 2717   |
| 8  | 0.84 | 2886   |
| 9  | 0.86 | 3112   |
| 10 | 0.88 | 3352   |
| 11 | 0.90 | 3787   |
| 12 | 0.92 | 4551   |
| 13 | 0.94 | 5210   |
| 14 | 0.96 | 6075   |
| 15 | 0.98 | 6904   |
| 16 | 1.00 | 8372   |
| 17 | 1.02 | 13525  |
| 18 | 1.04 | 23469  |
| 19 | 1.06 | 44078  |
| 20 | 1.08 | 75560  |
| 21 | 1.10 | 123617 |
| 22 | 1.12 | 79383  |
| 23 | 1.14 | 13268  |

\$\$

Optimisation and analysis of standard deviations

=====

Weighting scheme for averages: variance weights

All runs have fulls & partials

For all runs,

slopes (full, partial) of central part of normal probability plot = 0.86, 1.18

Correction applied to parameters for fulls and partials

SD correction parameters after normal probability correction

| Run                      | Fulls |      |        |     | Partials |      |        |      |
|--------------------------|-------|------|--------|-----|----------|------|--------|------|
|                          | SdFac | SdB  | SdAdd  | ISa | SdFac    | SdB  | SdAdd  | ISa  |
| AllRuns Fulls & partials | 0.97  | 0.00 | 0.1133 | 9.1 | 0.97     | 0.00 | 0.0806 | 12.8 |

I+ and I- will be kept separate in SD optimisation

For SD optimisation, number of outliers within I+ || I- sets: 75, between I+ & I-  
0, on |E|max 0

54237 reflections selected for SD optimisation out of 83675 in file

Damping factor: 0.050

Restraints on SD correction parameters (target (+-SD)): SdB 0.0 (+-10.0)

|       |            |         |                |         |                    |          |
|-------|------------|---------|----------------|---------|--------------------|----------|
| Cycle | 1 residual | 0.01013 | (main residual | 0.01013 | restraint residual | 0.00000) |
| Cycle | 2 residual | 0.00463 | (main residual | 0.00462 | restraint residual | 0.00002) |
| Cycle | 3 residual | 0.00411 | (main residual | 0.00409 | restraint residual | 0.00001) |
| Cycle | 4 residual | 0.00383 | (main residual | 0.00383 | restraint residual | 0.00000) |
| Cycle | 5 residual | 0.00369 | (main residual | 0.00369 | restraint residual | 0.00000) |
| Cycle | 6 residual | 0.00358 | (main residual | 0.00357 | restraint residual | 0.00000) |

SD correction parameters after optimisation

| Run                      | Fulls |      |        |     | Partials |       |        |      |
|--------------------------|-------|------|--------|-----|----------|-------|--------|------|
|                          | SdFac | SdB  | SdAdd  | ISa | SdFac    | SdB   | SdAdd  | ISa  |
| AllRuns Fulls & partials | 0.80  | 0.20 | 0.1679 | 7.4 | 0.80     | -0.25 | 0.0858 | 14.5 |

Time for SD optimisation = cpu time: 8.86 secs, elapsed time: 9.0 secs

Normal probability analysis of anomalous differences

=====

| All data |           |        | Data within expected delta 0.90 |           |        |
|----------|-----------|--------|---------------------------------|-----------|--------|
| Slope    | Intercept | Number | Slope                           | Intercept | Number |
| 1.04     | -0.07     | 70065  | 0.92                            | -0.05     | 44273  |

Outlier rejection limits for I+ v I-

have been adjusted by a factor  $3.70 * 0.92$

Reflections measured 3 or more times: 30.8 maximum deviation from weighted mean of all other observations

Reflections measured twice: 30.8 maximum deviation from weighted mean

Policy for deviant reflections measured twice: KEEP

The anomalous signal appears to be weak so anomalous flag was left OFF

Outlier analysis

=====

Test for Emax

Number of rejected outliers within I+ || I- sets: 583, between I+ & I- 0, on  
|E|max 0

\*\*\*\*\*

\* Final statistics \*

\*\*\*\*\*

Numbers of observations marked in the FLAG column

By default all flagged observations are rejected

Observations may be counted in more than one category

|                          | Flagged | Accepted | Maximum | MaxAccepted |
|--------------------------|---------|----------|---------|-------------|
| BGratio too large        | 0       | 0        | 1.600   | 0.000       |
| PKratio too large        | 68455   | 0        | 148.040 | 0.000       |
| Negative < 5sigma        | 0       | 0        |         |             |
| Gradient too large       | 0       | 0        | 0.244   | 0.000       |
| Profile-fitted overloads | 299     | 0        |         |             |
| Spots on edge            | 10547   | 0        |         |             |

XDS misfits (outliers)                    0            0

\*\*\*\*\*  
\* Merging statistics for dataset New/New/New \*  
\*\*\*\*\*

Analysis by Batch is in groups of batches, group width    1.00 degrees,    2 batches/group

Time for determination of anisotropic axes: cpu time: 2.01 secs, elapsed time: 2.0 secs  
Multiplicity 6.2 is above threshold 1.5 so deviant reflections measured twice are  
REJECTED in SD and Chi<sup>2</sup> analysis

Accepted data:

|                                           |        |
|-------------------------------------------|--------|
| Number of unique reflections              | 80454  |
| Number of observations                    | 436606 |
| Number of fully-recorded observations     | 344316 |
| Number of partially-recorded observations | 92290  |
| Number of scaled partial observations     | 0      |

|                                               |     |
|-----------------------------------------------|-----|
| Number of rejected outliers                   | 583 |
| Number of observations rejected on Emax limit | 0   |

Scale factors analysed by Batch for each dataset

=====

Note that Ok below is calculated for the centre of each rotation range,  
at theta = 0 (for the B-factor)

Mn(k) is average applied scale, including any input scale

Ok is the scale calculated excluding any input scale

Analysis by Batch is in groups of batches, group width    1.00 degrees,    2 batches/group

Bdecay comes from a straight line fit to the B-factors within each run

For run number 1, slope of B ( $A^2/\text{degree}$ ) 0.001

For run number 2, slope of B ( $A^2/\text{degree}$ ) -0.007

\$TABLE: === Scales v rotation range, New:

\$GRAPHS:Mn(k) & Ok (theta=0) v. batch:N:1,5,6:

:Relative Bfactor & Decay v. batch:A:1,8,9:

\$\$

| N  | Run | Phi    | Batch | Mn(k)  | Ok     | Number | Bfactor | Bdecay  | \$\$ \$\$ |
|----|-----|--------|-------|--------|--------|--------|---------|---------|-----------|
| 1  | 1   | -44.75 | 1     | 1.4681 | 0.9713 | 2571   | -2.8573 | -1.7279 |           |
| 3  | 1   | -43.75 | 3     | 1.4367 | 0.9847 | 2725   | -2.6727 | -1.7249 |           |
| 5  | 1   | -42.75 | 5     | 1.4119 | 0.9961 | 2673   | -2.4923 | -1.7219 |           |
| 7  | 1   | -41.75 | 7     | 1.3866 | 1.0065 | 2627   | -2.3189 | -1.7189 |           |
| 9  | 1   | -40.75 | 9     | 1.3621 | 1.0179 | 2638   | -2.1552 | -1.7160 |           |
| 11 | 1   | -39.75 | 11    | 1.3476 | 1.0326 | 2667   | -2.0031 | -1.7130 |           |
| 13 | 1   | -38.75 | 13    | 1.3336 | 1.0458 | 2664   | -1.8642 | -1.7100 |           |
| 15 | 1   | -37.75 | 15    | 1.3202 | 1.0586 | 2625   | -1.7395 | -1.7070 |           |
| 17 | 1   | -36.75 | 17    | 1.3163 | 1.0727 | 2636   | -1.6295 | -1.7041 |           |
| 19 | 1   | -35.75 | 19    | 1.3180 | 1.0912 | 2606   | -1.5342 | -1.7011 |           |
| 21 | 1   | -34.75 | 21    | 1.3252 | 1.1154 | 2626   | -1.4534 | -1.6981 |           |
| 23 | 1   | -33.75 | 23    | 1.3381 | 1.1374 | 2580   | -1.3866 | -1.6952 |           |
| 25 | 1   | -32.75 | 25    | 1.3411 | 1.1557 | 2657   | -1.3330 | -1.6922 |           |
| 27 | 1   | -31.75 | 27    | 1.3510 | 1.1714 | 2607   | -1.2920 | -1.6892 |           |
| 29 | 1   | -30.75 | 29    | 1.3567 | 1.1877 | 2650   | -1.2625 | -1.6862 |           |
| 31 | 1   | -29.75 | 31    | 1.3760 | 1.2068 | 2629   | -1.2438 | -1.6833 |           |
| 33 | 1   | -28.75 | 33    | 1.3854 | 1.2222 | 2615   | -1.2349 | -1.6803 |           |
| 35 | 1   | -27.75 | 35    | 1.3962 | 1.2334 | 2625   | -1.2348 | -1.6773 |           |
| 37 | 1   | -26.75 | 37    | 1.4012 | 1.2406 | 2618   | -1.2426 | -1.6743 |           |
| 39 | 1   | -25.75 | 39    | 1.4080 | 1.2453 | 2681   | -1.2572 | -1.6714 |           |
| 41 | 1   | -24.75 | 41    | 1.4103 | 1.2498 | 2561   | -1.2776 | -1.6684 |           |
| 43 | 1   | -23.75 | 43    | 1.4215 | 1.2527 | 2680   | -1.3026 | -1.6654 |           |

|     |   |        |     |        |        |      |         |         |
|-----|---|--------|-----|--------|--------|------|---------|---------|
| 45  | 1 | -22.75 | 45  | 1.4304 | 1.2559 | 2562 | -1.3311 | -1.6625 |
| 47  | 1 | -21.75 | 47  | 1.4338 | 1.2599 | 2689 | -1.3446 | -1.6595 |
| 49  | 1 | -20.75 | 49  | 1.4495 | 1.2656 | 2611 | -1.3846 | -1.6565 |
| 51  | 1 | -19.75 | 51  | 1.4610 | 1.2730 | 2731 | -1.4239 | -1.6535 |
| 53  | 1 | -18.75 | 53  | 1.4776 | 1.2795 | 2609 | -1.4618 | -1.6506 |
| 55  | 1 | -17.75 | 55  | 1.4859 | 1.2844 | 2649 | -1.4980 | -1.6476 |
| 57  | 1 | -16.75 | 57  | 1.4984 | 1.2880 | 2668 | -1.5321 | -1.6446 |
| 59  | 1 | -15.75 | 59  | 1.5096 | 1.2910 | 2584 | -1.5639 | -1.6416 |
| 61  | 1 | -14.75 | 61  | 1.5153 | 1.2944 | 2674 | -1.5935 | -1.6387 |
| 63  | 1 | -13.75 | 63  | 1.5242 | 1.2971 | 2680 | -1.6208 | -1.6357 |
| 65  | 1 | -12.75 | 65  | 1.5345 | 1.3000 | 2639 | -1.6461 | -1.6327 |
| 67  | 1 | -11.75 | 67  | 1.5428 | 1.3035 | 2681 | -1.6694 | -1.6298 |
| 69  | 1 | -10.75 | 69  | 1.5516 | 1.3084 | 2609 | -1.6911 | -1.6268 |
| 71  | 1 | -9.75  | 71  | 1.5630 | 1.3145 | 2631 | -1.7115 | -1.6238 |
| 73  | 1 | -8.75  | 73  | 1.5688 | 1.3198 | 2705 | -1.7307 | -1.6208 |
| 75  | 1 | -7.75  | 75  | 1.5816 | 1.3235 | 2667 | -1.7491 | -1.6179 |
| 77  | 1 | -6.75  | 77  | 1.5871 | 1.3255 | 2657 | -1.7669 | -1.6149 |
| 79  | 1 | -5.75  | 79  | 1.5923 | 1.3265 | 2657 | -1.7842 | -1.6119 |
| 81  | 1 | -4.75  | 81  | 1.5967 | 1.3270 | 2706 | -1.8013 | -1.6089 |
| 83  | 1 | -3.75  | 83  | 1.6008 | 1.3267 | 2672 | -1.8182 | -1.6060 |
| 85  | 1 | -2.75  | 85  | 1.6053 | 1.3262 | 2647 | -1.8349 | -1.6030 |
| 87  | 1 | -1.75  | 87  | 1.6044 | 1.3253 | 2731 | -1.8514 | -1.6000 |
| 89  | 1 | -0.75  | 89  | 1.6101 | 1.3237 | 2625 | -1.8677 | -1.5971 |
| 91  | 1 | 0.25   | 91  | 1.6143 | 1.3221 | 2675 | -1.8745 | -1.5941 |
| 93  | 1 | 1.25   | 93  | 1.6145 | 1.3212 | 2666 | -1.8828 | -1.5911 |
| 95  | 1 | 2.25   | 95  | 1.6163 | 1.3220 | 2698 | -1.8894 | -1.5881 |
| 97  | 1 | 3.25   | 97  | 1.6261 | 1.3254 | 2708 | -1.8939 | -1.5852 |
| 99  | 1 | 4.25   | 99  | 1.6420 | 1.3319 | 2649 | -1.8958 | -1.5822 |
| 101 | 1 | 5.25   | 101 | 1.6490 | 1.3407 | 2677 | -1.8946 | -1.5792 |
| 103 | 1 | 6.25   | 103 | 1.6622 | 1.3490 | 2737 | -1.8899 | -1.5762 |
| 105 | 1 | 7.25   | 105 | 1.6650 | 1.3549 | 2662 | -1.8812 | -1.5733 |
| 107 | 1 | 8.25   | 107 | 1.6744 | 1.3586 | 2688 | -1.8680 | -1.5703 |
| 109 | 1 | 9.25   | 109 | 1.6724 | 1.3610 | 2717 | -1.8498 | -1.5673 |

|     |   |       |     |        |        |      |         |         |
|-----|---|-------|-----|--------|--------|------|---------|---------|
| 111 | 1 | 10.25 | 111 | 1.6769 | 1.3629 | 2657 | -1.8262 | -1.5644 |
| 113 | 1 | 11.25 | 113 | 1.6698 | 1.3639 | 2679 | -1.7968 | -1.5614 |
| 115 | 1 | 12.25 | 115 | 1.6630 | 1.3645 | 2725 | -1.7610 | -1.5584 |
| 117 | 1 | 13.25 | 117 | 1.6601 | 1.3646 | 2640 | -1.7186 | -1.5554 |
| 119 | 1 | 14.25 | 119 | 1.6492 | 1.3644 | 2746 | -1.6693 | -1.5525 |
| 121 | 1 | 15.25 | 121 | 1.6406 | 1.3644 | 2649 | -1.6128 | -1.5495 |
| 123 | 1 | 16.25 | 123 | 1.6293 | 1.3647 | 2766 | -1.5492 | -1.5465 |
| 125 | 1 | 17.25 | 125 | 1.6181 | 1.3664 | 2667 | -1.4787 | -1.5435 |
| 127 | 1 | 18.25 | 127 | 1.6107 | 1.3702 | 2708 | -1.4017 | -1.5406 |
| 129 | 1 | 19.25 | 129 | 1.6028 | 1.3767 | 2640 | -1.3191 | -1.5376 |
| 131 | 1 | 20.25 | 131 | 1.5980 | 1.3851 | 2698 | -1.2317 | -1.5346 |
| 133 | 1 | 21.25 | 133 | 1.5900 | 1.3924 | 2751 | -1.1410 | -1.5317 |
| 135 | 1 | 22.25 | 135 | 1.5833 | 1.3965 | 2628 | -1.0482 | -1.5287 |
| 137 | 1 | 23.25 | 137 | 1.5779 | 1.3970 | 2643 | -1.0121 | -1.5257 |
| 139 | 1 | 24.25 | 139 | 1.5639 | 1.3943 | 2694 | -0.9406 | -1.5227 |
| 141 | 1 | 25.25 | 141 | 1.5505 | 1.3888 | 2709 | -0.8768 | -1.5198 |
| 143 | 1 | 26.25 | 143 | 1.5392 | 1.3823 | 2631 | -0.8230 | -1.5168 |
| 145 | 1 | 27.25 | 145 | 1.5317 | 1.3750 | 2635 | -0.7815 | -1.5138 |
| 147 | 1 | 28.25 | 147 | 1.5199 | 1.3654 | 2673 | -0.7542 | -1.5108 |
| 149 | 1 | 29.25 | 149 | 1.5136 | 1.3519 | 2687 | -0.7431 | -1.5079 |
| 151 | 1 | 30.25 | 151 | 1.5034 | 1.3339 | 2687 | -0.7499 | -1.5049 |
| 153 | 1 | 31.25 | 153 | 1.5017 | 1.3170 | 2678 | -0.7764 | -1.5019 |
| 155 | 1 | 32.25 | 155 | 1.5059 | 1.3010 | 2600 | -0.8239 | -1.4990 |
| 157 | 1 | 33.25 | 157 | 1.5130 | 1.2833 | 2675 | -0.8939 | -1.4960 |
| 159 | 1 | 34.25 | 159 | 1.5239 | 1.2610 | 2654 | -0.9879 | -1.4930 |
| 161 | 1 | 35.25 | 161 | 1.5268 | 1.2331 | 2689 | -1.1068 | -1.4900 |
| 163 | 1 | 36.25 | 163 | 1.5461 | 1.2090 | 2647 | -1.2518 | -1.4871 |
| 165 | 1 | 37.25 | 165 | 1.5788 | 1.1886 | 2643 | -1.4232 | -1.4841 |
| 167 | 1 | 38.25 | 167 | 1.6190 | 1.1693 | 2675 | -1.6213 | -1.4811 |
| 169 | 1 | 39.25 | 169 | 1.6542 | 1.1475 | 2604 | -1.8454 | -1.4781 |
| 171 | 1 | 40.25 | 171 | 1.7044 | 1.1232 | 2648 | -2.0940 | -1.4752 |
| 173 | 1 | 41.25 | 173 | 1.7691 | 1.1049 | 2664 | -2.3651 | -1.4722 |
| 175 | 1 | 42.25 | 175 | 1.8513 | 1.0945 | 2672 | -2.6552 | -1.4692 |

|     |   |        |      |        |        |      |         |         |
|-----|---|--------|------|--------|--------|------|---------|---------|
| 177 | 1 | 43.25  | 177  | 1.9627 | 1.0930 | 2648 | -2.9604 | -1.4663 |
| 179 | 1 | 44.25  | 179  | 2.0960 | 1.0989 | 2635 | -3.2757 | -1.4633 |
| 181 | 2 | -27.75 | 1035 | 2.1656 | 1.6683 | 2683 | -2.2839 | -0.7625 |
| 183 | 2 | -26.75 | 1037 | 1.9926 | 1.5728 | 2723 | -2.1248 | -0.7925 |
| 185 | 2 | -25.75 | 1039 | 1.8535 | 1.5045 | 2770 | -1.9711 | -0.8225 |
| 187 | 2 | -24.75 | 1041 | 1.7455 | 1.4524 | 2781 | -1.8265 | -0.8525 |
| 189 | 2 | -23.75 | 1043 | 1.6503 | 1.4034 | 2821 | -1.6939 | -0.8825 |
| 191 | 2 | -22.75 | 1045 | 1.5608 | 1.3501 | 2766 | -1.5756 | -0.9125 |
| 193 | 2 | -21.75 | 1047 | 1.4898 | 1.3090 | 2796 | -1.4726 | -0.9425 |
| 195 | 2 | -20.75 | 1049 | 1.4284 | 1.2744 | 2817 | -1.3856 | -0.9725 |
| 197 | 2 | -19.75 | 1051 | 1.3721 | 1.2399 | 2809 | -1.3144 | -1.0024 |
| 199 | 2 | -18.75 | 1053 | 1.3113 | 1.2004 | 2847 | -1.2584 | -1.0324 |
| 201 | 2 | -17.75 | 1055 | 1.2611 | 1.1593 | 2804 | -1.2166 | -1.0624 |
| 203 | 2 | -16.75 | 1057 | 1.2288 | 1.1302 | 2777 | -1.1882 | -1.0924 |
| 205 | 2 | -15.75 | 1059 | 1.2130 | 1.1145 | 2762 | -1.1718 | -1.1224 |
| 207 | 2 | -14.75 | 1061 | 1.2055 | 1.1104 | 2837 | -1.1664 | -1.1524 |
| 209 | 2 | -13.75 | 1063 | 1.2125 | 1.1143 | 2751 | -1.1707 | -1.1824 |
| 211 | 2 | -12.75 | 1065 | 1.2257 | 1.1211 | 2774 | -1.1833 | -1.2124 |
| 213 | 2 | -11.75 | 1067 | 1.2292 | 1.1275 | 2816 | -1.2028 | -1.2424 |
| 215 | 2 | -10.75 | 1069 | 1.2378 | 1.1299 | 2736 | -1.2276 | -1.2724 |
| 217 | 2 | -9.75  | 1071 | 1.2385 | 1.1282 | 2723 | -1.2334 | -1.3023 |
| 219 | 2 | -8.75  | 1073 | 1.2349 | 1.1233 | 2807 | -1.2696 | -1.3323 |
| 221 | 2 | -7.75  | 1075 | 1.2368 | 1.1173 | 2773 | -1.3043 | -1.3623 |
| 223 | 2 | -6.75  | 1077 | 1.2367 | 1.1125 | 2768 | -1.3366 | -1.3923 |
| 225 | 2 | -5.75  | 1079 | 1.2410 | 1.1097 | 2735 | -1.3656 | -1.4223 |
| 227 | 2 | -4.75  | 1081 | 1.2439 | 1.1084 | 2790 | -1.3906 | -1.4523 |
| 229 | 2 | -3.75  | 1083 | 1.2478 | 1.1079 | 2740 | -1.4113 | -1.4823 |
| 231 | 2 | -2.75  | 1085 | 1.2512 | 1.1077 | 2729 | -1.4272 | -1.5123 |
| 233 | 2 | -1.75  | 1087 | 1.2526 | 1.1078 | 2820 | -1.4381 | -1.5423 |
| 235 | 2 | -0.75  | 1089 | 1.2562 | 1.1079 | 2709 | -1.4441 | -1.5723 |
| 237 | 2 | 0.25   | 1091 | 1.2596 | 1.1080 | 2686 | -1.4451 | -1.6023 |
| 239 | 2 | 1.25   | 1093 | 1.2606 | 1.1085 | 2768 | -1.4412 | -1.6322 |
| 241 | 2 | 2.25   | 1095 | 1.2580 | 1.1093 | 2716 | -1.4326 | -1.6622 |

|     |   |        |      |         |         |      |          |          |
|-----|---|--------|------|---------|---------|------|----------|----------|
| 243 | 2 | 3. 25  | 1097 | 1. 2625 | 1. 1110 | 2624 | -1. 4194 | -1. 6922 |
| 245 | 2 | 4. 25  | 1099 | 1. 2624 | 1. 1141 | 2739 | -1. 4020 | -1. 7222 |
| 247 | 2 | 5. 25  | 1101 | 1. 2684 | 1. 1194 | 2710 | -1. 3808 | -1. 7522 |
| 249 | 2 | 6. 25  | 1103 | 1. 2760 | 1. 1267 | 2743 | -1. 3565 | -1. 7822 |
| 251 | 2 | 7. 25  | 1105 | 1. 2769 | 1. 1335 | 2696 | -1. 3297 | -1. 8122 |
| 253 | 2 | 8. 25  | 1107 | 1. 2819 | 1. 1386 | 2642 | -1. 3012 | -1. 8422 |
| 255 | 2 | 9. 25  | 1109 | 1. 2838 | 1. 1420 | 2656 | -1. 2840 | -1. 8722 |
| 257 | 2 | 10. 25 | 1111 | 1. 2848 | 1. 1447 | 2631 | -1. 2581 | -1. 9022 |
| 259 | 2 | 11. 25 | 1113 | 1. 2835 | 1. 1472 | 2700 | -1. 2348 | -1. 9321 |
| 261 | 2 | 12. 25 | 1115 | 1. 2862 | 1. 1486 | 2721 | -1. 2151 | -1. 9621 |
| 263 | 2 | 13. 25 | 1117 | 1. 2884 | 1. 1489 | 2660 | -1. 1997 | -1. 9921 |
| 265 | 2 | 14. 25 | 1119 | 1. 2908 | 1. 1481 | 2664 | -1. 1893 | -2. 0221 |
| 267 | 2 | 15. 25 | 1121 | 1. 2928 | 1. 1460 | 2665 | -1. 1845 | -2. 0521 |
| 269 | 2 | 16. 25 | 1123 | 1. 2889 | 1. 1426 | 2666 | -1. 1857 | -2. 0821 |
| 271 | 2 | 17. 25 | 1125 | 1. 2920 | 1. 1387 | 2662 | -1. 1934 | -2. 1121 |
| 273 | 2 | 18. 25 | 1127 | 1. 2980 | 1. 1340 | 2591 | -1. 2078 | -2. 1421 |
| 275 | 2 | 19. 25 | 1129 | 1. 2984 | 1. 1271 | 2691 | -1. 2293 | -2. 1721 |
| 277 | 2 | 20. 25 | 1131 | 1. 2982 | 1. 1175 | 2669 | -1. 2579 | -2. 2021 |
| 279 | 2 | 21. 25 | 1133 | 1. 2979 | 1. 1064 | 2585 | -1. 2936 | -2. 2321 |
| 281 | 2 | 22. 25 | 1135 | 1. 3034 | 1. 0978 | 2687 | -1. 3362 | -2. 2620 |
| 283 | 2 | 23. 25 | 1137 | 1. 3159 | 1. 0922 | 2677 | -1. 3852 | -2. 2920 |
| 285 | 2 | 24. 25 | 1139 | 1. 3298 | 1. 0888 | 2657 | -1. 4397 | -2. 3220 |
| 287 | 2 | 25. 25 | 1141 | 1. 3467 | 1. 0866 | 2588 | -1. 4985 | -2. 3520 |
| 289 | 2 | 26. 25 | 1143 | 1. 3748 | 1. 0839 | 2644 | -1. 5601 | -2. 3820 |
| 291 | 2 | 27. 25 | 1145 | 1. 4052 | 1. 0812 | 2595 | -1. 7124 | -2. 4120 |
| 293 | 2 | 28. 25 | 1147 | 1. 4282 | 1. 0769 | 2702 | -1. 8076 | -2. 4420 |
| 295 | 2 | 29. 25 | 1149 | 1. 4540 | 1. 0699 | 2597 | -1. 9104 | -2. 4720 |
| 297 | 2 | 30. 25 | 1151 | 1. 4721 | 1. 0603 | 2628 | -2. 0216 | -2. 5020 |
| 299 | 2 | 31. 25 | 1153 | 1. 5039 | 1. 0495 | 2631 | -2. 1429 | -2. 5320 |
| 301 | 2 | 32. 25 | 1155 | 1. 5316 | 1. 0411 | 2608 | -2. 2766 | -2. 5619 |
| 303 | 2 | 33. 25 | 1157 | 1. 5771 | 1. 0347 | 2627 | -2. 4256 | -2. 5919 |
| 305 | 2 | 34. 25 | 1159 | 1. 6235 | 1. 0288 | 2627 | -2. 5936 | -2. 6219 |
| 307 | 2 | 35. 25 | 1161 | 1. 6731 | 1. 0228 | 2682 | -2. 7848 | -2. 6519 |

|     |   |       |      |        |        |      |         |         |
|-----|---|-------|------|--------|--------|------|---------|---------|
| 309 | 2 | 36.25 | 1163 | 1.7425 | 1.0151 | 2621 | -3.0034 | -2.6819 |
| 311 | 2 | 37.25 | 1165 | 1.8170 | 1.0082 | 2635 | -3.2537 | -2.7119 |
| 313 | 2 | 38.25 | 1167 | 1.9018 | 0.9998 | 2641 | -3.5393 | -2.7419 |
| 315 | 2 | 39.25 | 1169 | 2.0080 | 0.9880 | 2628 | -3.8629 | -2.7719 |
| 317 | 2 | 40.25 | 1171 | 2.1194 | 0.9736 | 2651 | -4.2253 | -2.8019 |
| 319 | 2 | 41.25 | 1173 | 2.2442 | 0.9618 | 2703 | -4.6253 | -2.8319 |
| 321 | 2 | 42.25 | 1175 | 2.4406 | 0.9554 | 2645 | -5.0590 | -2.8618 |
| 323 | 2 | 43.25 | 1177 | 2.6846 | 0.9559 | 2614 | -5.5197 | -2.8918 |
| 325 | 2 | 44.25 | 1179 | 2.9506 | 0.9626 | 2602 | -5.9985 | -2.9218 |

\$\$

| N | Run | Phi | Batch | Mn(k) | Ok | Number | Bfactor | Bdecay |
|---|-----|-----|-------|-------|----|--------|---------|--------|
|---|-----|-----|-------|-------|----|--------|---------|--------|

Agreement between batches

=====

Rmerge in this table is the difference from Mn(I<sub>mean</sub>),

but in later tables Rmerge is the difference from Mn(I<sub>+</sub>), Mn(I<sub>-</sub>)

Mean Chi<sup>2</sup> values are calculated for all data, and also

excluding observations with large deviations >5sd, including for reflections measured only twice (Chi<sup>2</sup><sub>c</sub>)

SmRmerge and SmMaxRes in table are smoothed over 5 batch groups

\$TABLE: Analysis against all Batches for all runs, New:

\$GRAPHS:Rmerge v Batch for all runs:N:1,15,6:

:Filtered Mean(Chi<sup>2</sup>) (<5sd) v Batch:N:1,14:

:Mean(Chi<sup>2</sup>), Mean(Chi<sup>2</sup>) (<5sd) v Batch:N:1,13,14:

:Cumulative %completeness & Anom%cmpl v Batch:N:1,10,9:

:Maximum resolution limit, I/sigma > 1.0:A:1,16,11:

:I<sub>mean</sub> & RMS Scatter:N:1,3,4:

:I<sub>mean</sub>/RMS scatter:N:1,5:

:Number of rejects:N:1,8:

:Cumulative multiplicity:N:1,12:

\$\$

| N      | Batch | Mn(I)  | RMSdev   | I/rms    | Rmerge    | Number | Nrej | Cm%poss | AnoCmp | MaxRes |
|--------|-------|--------|----------|----------|-----------|--------|------|---------|--------|--------|
| CMlplc | Chi^2 | Chi^2c | SmRmerge | SmMaxRes | \$\$ \$\$ |        |      |         |        |        |
| 1      | 1     | 77.8   | 19.1     | 4.07     | 0.146     | 4992   | 2    | 3.0     | 0.0    | 1.46   |
| 0.03   | 1.41  | 1.36   | 0.129    | 1.46     |           |        |      |         |        |        |
| 3      | 3     | 84.0   | 15.4     | 5.47     | 0.130     | 5288   | 3    | 6.2     | 0.1    | 1.46   |
| 0.06   | 1.19  | 1.17   | 0.129    | 1.46     |           |        |      |         |        |        |
| 5      | 5     | 86.8   | 14.9     | 5.84     | 0.116     | 5169   | 0    | 9.1     | 0.2    | 1.46   |
| 0.10   | 0.99  | 0.98   | 0.129    | 1.46     |           |        |      |         |        |        |
| 7      | 7     | 76.2   | 38.1     | 2.00     | 0.130     | 5104   | 2    | 11.9    | 0.5    | 1.46   |
| 0.13   | 15.11 | 0.95   | 0.123    | 1.46     |           |        |      |         |        |        |
| 9      | 9     | 85.2   | 22.7     | 3.76     | 0.122     | 5086   | 1    | 14.5    | 0.8    | 1.46   |
| 0.16   | 1.11  | 0.90   | 0.116    | 1.46     |           |        |      |         |        |        |
| 11     | 11    | 76.6   | 15.0     | 5.10     | 0.115     | 5148   | 2    | 17.1    | 1.3    | 1.46   |
| 0.19   | 0.85  | 0.85   | 0.114    | 1.46     |           |        |      |         |        |        |
| 13     | 13    | 78.6   | 12.0     | 6.53     | 0.099     | 5133   | 1    | 19.6    | 1.7    | 1.46   |
| 0.22   | 0.75  | 0.75   | 0.109    | 1.46     |           |        |      |         |        |        |
| 15     | 15    | 77.2   | 14.6     | 5.31     | 0.105     | 5079   | 0    | 21.9    | 2.3    | 1.46   |
| 0.25   | 0.79  | 0.79   | 0.106    | 1.46     |           |        |      |         |        |        |
| 17     | 17    | 74.3   | 12.1     | 6.16     | 0.105     | 5070   | 1    | 24.1    | 2.8    | 1.46   |
| 0.29   | 0.77  | 0.76   | 0.103    | 1.46     |           |        |      |         |        |        |
| 19     | 19    | 81.0   | 30.9     | 2.62     | 0.104     | 5018   | 2    | 26.2    | 3.5    | 1.46   |
| 0.32   | 2.70  | 0.72   | 0.105    | 1.46     |           |        |      |         |        |        |
| 21     | 21    | 71.7   | 21.2     | 3.38     | 0.104     | 5086   | 2    | 28.2    | 4.1    | 1.46   |
| 0.35   | 0.86  | 0.76   | 0.106    | 1.46     |           |        |      |         |        |        |
| 23     | 23    | 72.2   | 11.0     | 6.57     | 0.107     | 4963   | 3    | 30.1    | 4.7    | 1.46   |
| 0.38   | 0.75  | 0.74   | 0.105    | 1.46     |           |        |      |         |        |        |
| 25     | 25    | 72.7   | 12.1     | 6.03     | 0.107     | 5125   | 1    | 32.0    | 5.3    | 1.46   |
| 0.41   | 0.78  | 0.78   | 0.103    | 1.46     |           |        |      |         |        |        |
| 27     | 27    | 79.0   | 12.4     | 6.37     | 0.102     | 5009   | 1    | 33.7    | 5.8    | 1.46   |
| 0.45   | 0.75  | 0.73   | 0.103    | 1.46     |           |        |      |         |        |        |

|      |      |      |       |      |       |      |   |      |      |      |
|------|------|------|-------|------|-------|------|---|------|------|------|
| 29   | 29   | 84.6 | 12.3  | 6.87 | 0.097 | 5070 | 3 | 35.4 | 6.3  | 1.46 |
| 0.48 | 0.75 | 0.74 | 0.104 | 1.46 |       |      |   |      |      |      |
| 31   | 31   | 76.3 | 11.8  | 6.45 | 0.104 | 5046 | 0 | 37.0 | 6.8  | 1.46 |
| 0.51 | 0.78 | 0.77 | 0.102 | 1.46 |       |      |   |      |      |      |
| 33   | 33   | 77.0 | 11.1  | 6.95 | 0.107 | 4999 | 3 | 38.6 | 7.2  | 1.46 |
| 0.54 | 0.69 | 0.69 | 0.103 | 1.46 |       |      |   |      |      |      |
| 35   | 35   | 81.1 | 12.2  | 6.64 | 0.100 | 5030 | 8 | 40.1 | 7.7  | 1.46 |
| 0.57 | 0.74 | 0.73 | 0.105 | 1.46 |       |      |   |      |      |      |
| 37   | 37   | 75.3 | 11.6  | 6.49 | 0.110 | 4988 | 3 | 41.6 | 8.2  | 1.46 |
| 0.61 | 0.74 | 0.73 | 0.105 | 1.46 |       |      |   |      |      |      |
| 39   | 39   | 78.3 | 12.3  | 6.39 | 0.106 | 5111 | 4 | 43.1 | 8.7  | 1.46 |
| 0.64 | 0.73 | 0.73 | 0.105 | 1.46 |       |      |   |      |      |      |
| 41   | 41   | 81.0 | 10.8  | 7.50 | 0.101 | 4842 | 3 | 44.5 | 9.3  | 1.46 |
| 0.67 | 0.71 | 0.71 | 0.106 | 1.46 |       |      |   |      |      |      |
| 43   | 43   | 78.6 | 13.3  | 5.89 | 0.109 | 5096 | 1 | 45.9 | 9.9  | 1.46 |
| 0.70 | 0.71 | 0.71 | 0.108 | 1.46 |       |      |   |      |      |      |
| 45   | 45   | 77.9 | 11.7  | 6.64 | 0.105 | 4882 | 2 | 47.2 | 10.5 | 1.48 |
| 0.73 | 0.70 | 0.69 | 0.109 | 1.46 |       |      |   |      |      |      |
| 47   | 47   | 83.3 | 35.8  | 2.33 | 0.119 | 5126 | 2 | 48.6 | 11.2 | 1.46 |
| 0.77 | 1.00 | 0.75 | 0.111 | 1.46 |       |      |   |      |      |      |
| 49   | 49   | 75.4 | 11.8  | 6.40 | 0.112 | 5037 | 1 | 49.9 | 11.9 | 1.48 |
| 0.80 | 0.76 | 0.75 | 0.113 | 1.47 |       |      |   |      |      |      |
| 51   | 51   | 76.5 | 13.1  | 5.85 | 0.111 | 5253 | 3 | 51.3 | 12.7 | 1.47 |
| 0.83 | 0.80 | 0.79 | 0.115 | 1.46 |       |      |   |      |      |      |
| 53   | 53   | 71.3 | 11.3  | 6.31 | 0.117 | 5040 | 2 | 52.5 | 13.5 | 1.46 |
| 0.86 | 0.77 | 0.77 | 0.114 | 1.46 |       |      |   |      |      |      |
| 55   | 55   | 77.7 | 14.0  | 5.54 | 0.114 | 5158 | 2 | 53.8 | 14.3 | 1.46 |
| 0.90 | 0.79 | 0.78 | 0.115 | 1.46 |       |      |   |      |      |      |
| 57   | 57   | 77.9 | 16.3  | 4.77 | 0.117 | 5194 | 3 | 55.1 | 15.2 | 1.46 |
| 0.93 | 0.89 | 0.83 | 0.115 | 1.46 |       |      |   |      |      |      |
| 59   | 59   | 80.7 | 12.7  | 6.36 | 0.114 | 4985 | 2 | 56.3 | 16.2 | 1.46 |
| 0.96 | 0.84 | 0.83 | 0.115 | 1.46 |       |      |   |      |      |      |
| 61   | 61   | 83.9 | 13.2  | 6.36 | 0.114 | 5116 | 2 | 57.5 | 17.1 | 1.46 |

|      |      |      |       |      |       |      |   |      |      |      |
|------|------|------|-------|------|-------|------|---|------|------|------|
| 0.99 | 0.82 | 0.81 | 0.116 | 1.46 |       |      |   |      |      |      |
| 63   | 63   | 77.7 | 14.5  | 5.36 | 0.116 | 5142 | 3 | 58.8 | 18.2 | 1.46 |
| 1.02 | 0.81 | 0.80 | 0.116 | 1.46 |       |      |   |      |      |      |
| 65   | 65   | 76.0 | 12.4  | 6.14 | 0.119 | 5055 | 3 | 59.9 | 19.2 | 1.46 |
| 1.06 | 0.80 | 0.80 | 0.115 | 1.46 |       |      |   |      |      |      |
| 67   | 67   | 81.6 | 14.1  | 5.79 | 0.116 | 5091 | 3 | 61.1 | 20.3 | 1.48 |
| 1.09 | 0.77 | 0.76 | 0.115 | 1.46 |       |      |   |      |      |      |
| 69   | 69   | 88.2 | 17.0  | 5.18 | 0.109 | 4952 | 0 | 62.2 | 21.4 | 1.46 |
| 1.12 | 0.81 | 0.81 | 0.114 | 1.46 |       |      |   |      |      |      |
| 71   | 71   | 86.2 | 16.8  | 5.12 | 0.113 | 4997 | 2 | 63.3 | 22.5 | 1.47 |
| 1.15 | 0.77 | 0.77 | 0.115 | 1.48 |       |      |   |      |      |      |
| 73   | 73   | 84.3 | 15.2  | 5.55 | 0.112 | 5126 | 4 | 64.4 | 23.7 | 1.46 |
| 1.19 | 0.79 | 0.79 | 0.117 | 1.48 |       |      |   |      |      |      |
| 75   | 75   | 83.3 | 15.0  | 5.55 | 0.122 | 5048 | 0 | 65.5 | 24.8 | 1.49 |
| 1.22 | 0.84 | 0.83 | 0.119 | 1.48 |       |      |   |      |      |      |
| 77   | 77   | 71.2 | 12.2  | 5.82 | 0.129 | 5067 | 1 | 66.6 | 26.0 | 1.48 |
| 1.25 | 0.80 | 0.80 | 0.122 | 1.48 |       |      |   |      |      |      |
| 79   | 79   | 89.8 | 31.0  | 2.89 | 0.120 | 5043 | 5 | 67.7 | 27.1 | 1.48 |
| 1.28 | 1.17 | 0.79 | 0.124 | 1.48 |       |      |   |      |      |      |
| 81   | 81   | 72.3 | 13.1  | 5.51 | 0.126 | 5170 | 1 | 68.7 | 28.3 | 1.49 |
| 1.32 | 0.82 | 0.81 | 0.122 | 1.47 |       |      |   |      |      |      |
| 83   | 83   | 81.2 | 18.5  | 4.39 | 0.123 | 5086 | 0 | 69.7 | 29.5 | 1.46 |
| 1.35 | 0.79 | 0.79 | 0.119 | 1.47 |       |      |   |      |      |      |
| 85   | 85   | 82.9 | 13.5  | 6.13 | 0.112 | 5068 | 3 | 70.8 | 30.6 | 1.46 |
| 1.38 | 0.78 | 0.76 | 0.119 | 1.48 |       |      |   |      |      |      |
| 87   | 87   | 81.9 | 11.4  | 7.16 | 0.114 | 5201 | 0 | 71.8 | 31.9 | 1.48 |
| 1.42 | 0.74 | 0.74 | 0.116 | 1.46 |       |      |   |      |      |      |
| 89   | 89   | 74.2 | 12.1  | 6.11 | 0.120 | 5030 | 2 | 72.8 | 33.0 | 1.49 |
| 1.45 | 0.78 | 0.78 | 0.115 | 1.46 |       |      |   |      |      |      |
| 91   | 91   | 77.4 | 11.5  | 6.75 | 0.112 | 5139 | 0 | 73.7 | 34.2 | 1.46 |
| 1.48 | 0.82 | 0.82 | 0.115 | 1.46 |       |      |   |      |      |      |
| 93   | 93   | 73.4 | 12.1  | 6.06 | 0.118 | 5130 | 2 | 74.7 | 35.3 | 1.46 |
| 1.51 | 0.78 | 0.78 | 0.116 | 1.46 |       |      |   |      |      |      |

|      |       |      |       |      |       |      |   |      |      |      |
|------|-------|------|-------|------|-------|------|---|------|------|------|
| 95   | 95    | 86.1 | 12.1  | 7.13 | 0.113 | 5156 | 2 | 75.7 | 36.5 | 1.47 |
| 1.55 | 0.80  | 0.80 | 0.114 | 1.46 |       |      |   |      |      |      |
| 97   | 97    | 83.9 | 13.5  | 6.23 | 0.116 | 5228 | 4 | 76.6 | 37.7 | 1.46 |
| 1.58 | 0.82  | 0.80 | 0.116 | 1.46 |       |      |   |      |      |      |
| 99   | 99    | 80.4 | 13.2  | 6.10 | 0.113 | 5088 | 0 | 77.5 | 38.9 | 1.47 |
| 1.61 | 0.79  | 0.78 | 0.116 | 1.47 |       |      |   |      |      |      |
| 101  | 101   | 77.6 | 12.0  | 6.47 | 0.119 | 5152 | 3 | 78.3 | 40.1 | 1.46 |
| 1.64 | 0.79  | 0.79 | 0.116 | 1.48 |       |      |   |      |      |      |
| 103  | 103   | 83.1 | 21.1  | 3.93 | 0.119 | 5257 | 1 | 79.2 | 41.3 | 1.48 |
| 1.68 | 13.82 | 0.74 | 0.118 | 1.48 |       |      |   |      |      |      |
| 105  | 105   | 86.6 | 14.9  | 5.80 | 0.116 | 5132 | 0 | 80.0 | 42.5 | 1.50 |
| 1.71 | 0.77  | 0.76 | 0.121 | 1.48 |       |      |   |      |      |      |
| 107  | 107   | 80.0 | 14.2  | 5.62 | 0.125 | 5180 | 2 | 80.8 | 43.7 | 1.46 |
| 1.74 | 0.82  | 0.82 | 0.124 | 1.49 |       |      |   |      |      |      |
| 109  | 109   | 76.7 | 13.5  | 5.68 | 0.126 | 5245 | 1 | 81.6 | 44.9 | 1.48 |
| 1.78 | 0.81  | 0.80 | 0.125 | 1.48 |       |      |   |      |      |      |
| 111  | 111   | 67.8 | 12.1  | 5.59 | 0.133 | 5149 | 2 | 82.3 | 46.2 | 1.49 |
| 1.81 | 0.81  | 0.81 | 0.127 | 1.48 |       |      |   |      |      |      |
| 113  | 113   | 76.5 | 13.3  | 5.77 | 0.126 | 5191 | 1 | 83.1 | 47.3 | 1.48 |
| 1.84 | 0.81  | 0.80 | 0.126 | 1.49 |       |      |   |      |      |      |
| 115  | 115   | 76.5 | 14.2  | 5.40 | 0.125 | 5277 | 0 | 83.7 | 48.6 | 1.48 |
| 1.87 | 0.76  | 0.75 | 0.126 | 1.49 |       |      |   |      |      |      |
| 117  | 117   | 79.4 | 13.0  | 6.11 | 0.118 | 5126 | 0 | 84.4 | 49.8 | 1.48 |
| 1.91 | 0.75  | 0.74 | 0.125 | 1.48 |       |      |   |      |      |      |
| 119  | 119   | 76.8 | 12.2  | 6.29 | 0.130 | 5315 | 1 | 85.0 | 51.0 | 1.49 |
| 1.94 | 0.79  | 0.78 | 0.123 | 1.48 |       |      |   |      |      |      |
| 121  | 121   | 78.7 | 12.1  | 6.49 | 0.125 | 5114 | 1 | 85.6 | 52.2 | 1.48 |
| 1.97 | 0.81  | 0.81 | 0.122 | 1.48 |       |      |   |      |      |      |
| 123  | 123   | 83.0 | 14.4  | 5.77 | 0.120 | 5363 | 3 | 86.2 | 53.4 | 1.48 |
| 2.01 | 0.80  | 0.80 | 0.123 | 1.48 |       |      |   |      |      |      |
| 125  | 125   | 82.7 | 12.2  | 6.79 | 0.116 | 5143 | 0 | 86.8 | 54.6 | 1.47 |
| 2.04 | 0.76  | 0.76 | 0.121 | 1.48 |       |      |   |      |      |      |
| 127  | 127   | 79.8 | 22.9  | 3.48 | 0.124 | 5218 | 1 | 87.2 | 55.7 | 1.49 |

|      |      |      |       |      |       |      |   |      |      |      |
|------|------|------|-------|------|-------|------|---|------|------|------|
| 2.07 | 0.79 | 0.78 | 0.120 | 1.48 |       |      |   |      |      |      |
| 129  | 129  | 74.1 | 13.2  | 5.63 | 0.121 | 5092 | 1 | 87.7 | 56.8 | 1.46 |
| 2.10 | 0.75 | 0.75 | 0.121 | 1.49 |       |      |   |      |      |      |
| 131  | 131  | 71.6 | 11.9  | 5.99 | 0.122 | 5186 | 1 | 88.0 | 57.8 | 1.49 |
| 2.14 | 0.78 | 0.78 | 0.124 | 1.49 |       |      |   |      |      |      |
| 133  | 133  | 76.3 | 12.8  | 5.97 | 0.123 | 5319 | 3 | 88.4 | 58.7 | 1.48 |
| 2.17 | 0.82 | 0.81 | 0.123 | 1.48 |       |      |   |      |      |      |
| 135  | 135  | 71.2 | 11.8  | 6.04 | 0.132 | 5044 | 0 | 88.8 | 59.4 | 1.46 |
| 2.20 | 0.80 | 0.80 | 0.123 | 1.48 |       |      |   |      |      |      |
| 137  | 137  | 76.8 | 13.1  | 5.87 | 0.117 | 5102 | 3 | 89.1 | 60.1 | 1.48 |
| 2.23 | 0.80 | 0.80 | 0.124 | 1.48 |       |      |   |      |      |      |
| 139  | 139  | 76.1 | 12.1  | 6.31 | 0.125 | 5192 | 3 | 89.4 | 60.8 | 1.50 |
| 2.27 | 0.83 | 0.83 | 0.125 | 1.48 |       |      |   |      |      |      |
| 141  | 141  | 74.0 | 15.9  | 4.65 | 0.125 | 5235 | 3 | 89.6 | 61.4 | 1.49 |
| 2.30 | 0.84 | 0.84 | 0.122 | 1.48 |       |      |   |      |      |      |
| 143  | 143  | 70.0 | 13.1  | 5.34 | 0.126 | 5092 | 0 | 89.9 | 62.0 | 1.48 |
| 2.33 | 0.80 | 0.80 | 0.122 | 1.48 |       |      |   |      |      |      |
| 145  | 145  | 73.4 | 13.4  | 5.48 | 0.117 | 5115 | 0 | 90.1 | 62.5 | 1.49 |
| 2.36 | 0.77 | 0.77 | 0.121 | 1.48 |       |      |   |      |      |      |
| 147  | 147  | 84.2 | 14.9  | 5.67 | 0.116 | 5153 | 1 | 90.4 | 63.1 | 1.46 |
| 2.39 | 0.82 | 0.81 | 0.120 | 1.48 |       |      |   |      |      |      |
| 149  | 149  | 76.0 | 14.5  | 5.23 | 0.123 | 5216 | 0 | 90.6 | 63.6 | 1.46 |
| 2.43 | 0.86 | 0.85 | 0.120 | 1.48 |       |      |   |      |      |      |
| 151  | 151  | 84.8 | 17.5  | 4.84 | 0.119 | 5197 | 1 | 90.8 | 64.1 | 1.48 |
| 2.46 | 0.84 | 0.81 | 0.122 | 1.46 |       |      |   |      |      |      |
| 153  | 153  | 70.4 | 12.5  | 5.62 | 0.128 | 5193 | 1 | 91.0 | 64.7 | 1.46 |
| 2.49 | 0.87 | 0.85 | 0.125 | 1.47 |       |      |   |      |      |      |
| 155  | 155  | 71.1 | 14.1  | 5.05 | 0.125 | 5073 | 0 | 91.1 | 65.2 | 1.46 |
| 2.52 | 0.86 | 0.85 | 0.128 | 1.48 |       |      |   |      |      |      |
| 157  | 157  | 74.8 | 15.3  | 4.88 | 0.131 | 5210 | 2 | 91.3 | 65.8 | 1.48 |
| 2.55 | 0.92 | 0.91 | 0.134 | 1.48 |       |      |   |      |      |      |
| 159  | 159  | 67.3 | 14.8  | 4.54 | 0.139 | 5158 | 0 | 91.4 | 66.3 | 1.48 |
| 2.59 | 0.93 | 0.92 | 0.136 | 1.48 |       |      |   |      |      |      |

|      |      |       |       |      |       |      |   |      |      |      |
|------|------|-------|-------|------|-------|------|---|------|------|------|
| 161  | 161  | 64.5  | 15.1  | 4.27 | 0.146 | 5254 | 1 | 91.5 | 66.9 | 1.49 |
| 2.62 | 0.94 | 0.93  | 0.141 | 1.48 |       |      |   |      |      |      |
| 163  | 163  | 66.0  | 15.1  | 4.36 | 0.140 | 5176 | 1 | 91.6 | 67.5 | 1.48 |
| 2.65 | 0.97 | 0.96  | 0.142 | 1.48 |       |      |   |      |      |      |
| 165  | 165  | 63.7  | 17.2  | 3.69 | 0.148 | 5156 | 0 | 91.7 | 68.1 | 1.46 |
| 2.68 | 1.00 | 0.99  | 0.144 | 1.48 |       |      |   |      |      |      |
| 167  | 167  | 68.5  | 17.3  | 3.96 | 0.139 | 5239 | 4 | 91.8 | 68.7 | 1.48 |
| 2.72 | 1.06 | 1.03  | 0.147 | 1.48 |       |      |   |      |      |      |
| 169  | 169  | 68.0  | 17.5  | 3.89 | 0.146 | 5097 | 0 | 91.9 | 69.3 | 1.48 |
| 2.75 | 1.05 | 1.04  | 0.150 | 1.49 |       |      |   |      |      |      |
| 171  | 171  | 63.2  | 18.3  | 3.45 | 0.164 | 5173 | 0 | 91.9 | 69.9 | 1.50 |
| 2.78 | 1.11 | 1.09  | 0.152 | 1.50 |       |      |   |      |      |      |
| 173  | 173  | 69.1  | 27.6  | 2.51 | 0.157 | 5219 | 1 | 92.0 | 70.5 | 1.53 |
| 2.81 | 1.26 | 1.07  | 0.158 | 1.51 |       |      |   |      |      |      |
| 175  | 175  | 65.0  | 18.0  | 3.62 | 0.155 | 5242 | 2 | 92.0 | 71.1 | 1.50 |
| 2.84 | 1.19 | 1.15  | 0.166 | 1.52 |       |      |   |      |      |      |
| 177  | 177  | 64.4  | 21.5  | 3.00 | 0.170 | 5204 | 3 | 92.1 | 71.7 | 1.55 |
| 2.88 | 1.40 | 1.30  | 0.166 | 1.52 |       |      |   |      |      |      |
| 179  | 179  | 64.7  | 18.9  | 3.43 | 0.183 | 5175 | 0 | 92.2 | 72.3 | 1.53 |
| 2.91 | 1.49 | 1.41  | 0.166 | 1.52 |       |      |   |      |      |      |
| 181  | 1035 | 77.1  | 23.2  | 3.32 | 0.195 | 5242 | 3 | 92.3 | 72.6 | 1.57 |
| 2.94 | 0.99 | 0.98  | 0.151 | 1.54 |       |      |   |      |      |      |
| 183  | 1037 | 79.0  | 19.6  | 4.02 | 0.175 | 5326 | 0 | 92.3 | 72.8 | 1.54 |
| 2.97 | 0.94 | 0.91  | 0.151 | 1.54 |       |      |   |      |      |      |
| 185  | 1039 | 90.0  | 17.5  | 5.13 | 0.146 | 5367 | 1 | 92.5 | 73.1 | 1.54 |
| 3.01 | 0.87 | 0.84  | 0.151 | 1.54 |       |      |   |      |      |      |
| 187  | 1041 | 99.1  | 17.0  | 5.84 | 0.130 | 5390 | 0 | 92.6 | 73.4 | 1.50 |
| 3.04 | 0.83 | 0.82  | 0.135 | 1.53 |       |      |   |      |      |      |
| 189  | 1043 | 104.6 | 15.9  | 6.60 | 0.121 | 5472 | 2 | 92.7 | 73.7 | 1.51 |
| 3.08 | 0.84 | 0.83  | 0.123 | 1.52 |       |      |   |      |      |      |
| 191  | 1045 | 100.8 | 15.6  | 6.45 | 0.113 | 5375 | 2 | 92.9 | 74.1 | 1.50 |
| 3.11 | 0.81 | 0.80  | 0.115 | 1.50 |       |      |   |      |      |      |
| 193  | 1047 | 104.8 | 16.7  | 6.28 | 0.111 | 5416 | 0 | 93.0 | 74.5 | 1.53 |

|       |       |        |        |       |        |      |   |       |       |       |
|-------|-------|--------|--------|-------|--------|------|---|-------|-------|-------|
| 3. 14 | 0. 85 | 0. 80  | 0. 109 | 1. 49 |        |      |   |       |       |       |
| 195   | 1049  | 106. 6 | 17. 1  | 6. 25 | 0. 102 | 5473 | 0 | 93. 1 | 74. 9 | 1. 49 |
| 3. 18 | 0. 84 | 0. 81  | 0. 104 | 1. 49 |        |      |   |       |       |       |
| 197   | 1051  | 112. 7 | 16. 0  | 7. 02 | 0. 097 | 5440 | 1 | 93. 3 | 75. 4 | 1. 46 |
| 3. 21 | 0. 85 | 0. 85  | 0. 100 | 1. 48 |        |      |   |       |       |       |
| 199   | 1053  | 112. 2 | 19. 0  | 5. 91 | 0. 097 | 5498 | 1 | 93. 4 | 75. 9 | 1. 48 |
| 3. 25 | 0. 89 | 0. 88  | 0. 095 | 1. 48 |        |      |   |       |       |       |
| 201   | 1055  | 107. 1 | 31. 7  | 3. 38 | 0. 093 | 5446 | 0 | 93. 5 | 76. 3 | 1. 48 |
| 3. 28 | 1. 26 | 0. 86  | 0. 094 | 1. 48 |        |      |   |       |       |       |
| 203   | 1057  | 107. 2 | 15. 4  | 6. 96 | 0. 087 | 5396 | 0 | 93. 7 | 76. 9 | 1. 50 |
| 3. 31 | 0. 83 | 0. 82  | 0. 092 | 1. 48 |        |      |   |       |       |       |
| 205   | 1059  | 95. 0  | 21. 2  | 4. 48 | 0. 095 | 5389 | 0 | 93. 8 | 77. 4 | 1. 48 |
| 3. 35 | 0. 86 | 0. 83  | 0. 092 | 1. 48 |        |      |   |       |       |       |
| 207   | 1061  | 107. 3 | 13. 5  | 7. 93 | 0. 087 | 5475 | 3 | 93. 9 | 78. 0 | 1. 46 |
| 3. 38 | 0. 83 | 0. 82  | 0. 092 | 1. 48 |        |      |   |       |       |       |
| 209   | 1063  | 100. 2 | 15. 6  | 6. 42 | 0. 096 | 5349 | 2 | 94. 1 | 78. 5 | 1. 48 |
| 3. 42 | 0. 88 | 0. 85  | 0. 095 | 1. 48 |        |      |   |       |       |       |
| 211   | 1065  | 105. 3 | 20. 8  | 5. 06 | 0. 096 | 5413 | 1 | 94. 2 | 79. 1 | 1. 49 |
| 3. 45 | 0. 90 | 0. 84  | 0. 095 | 1. 48 |        |      |   |       |       |       |
| 213   | 1067  | 100. 9 | 22. 4  | 4. 51 | 0. 099 | 5447 | 2 | 94. 3 | 79. 8 | 1. 48 |
| 3. 48 | 1. 92 | 0. 82  | 0. 097 | 1. 48 |        |      |   |       |       |       |
| 215   | 1069  | 102. 4 | 16. 6  | 6. 17 | 0. 095 | 5335 | 2 | 94. 5 | 80. 4 | 1. 48 |
| 3. 52 | 0. 81 | 0. 81  | 0. 097 | 1. 48 |        |      |   |       |       |       |
| 217   | 1071  | 95. 9  | 13. 6  | 7. 07 | 0. 096 | 5297 | 3 | 94. 5 | 81. 1 | 1. 48 |
| 3. 55 | 0. 78 | 0. 78  | 0. 097 | 1. 48 |        |      |   |       |       |       |
| 219   | 1073  | 94. 4  | 14. 2  | 6. 64 | 0. 097 | 5462 | 0 | 94. 6 | 81. 8 | 1. 48 |
| 3. 58 | 0. 80 | 0. 77  | 0. 096 | 1. 48 |        |      |   |       |       |       |
| 221   | 1075  | 99. 2  | 15. 0  | 6. 62 | 0. 097 | 5383 | 1 | 94. 7 | 82. 5 | 1. 48 |
| 3. 62 | 0. 79 | 0. 78  | 0. 096 | 1. 48 |        |      |   |       |       |       |
| 223   | 1077  | 93. 7  | 12. 0  | 7. 80 | 0. 093 | 5386 | 1 | 94. 8 | 83. 2 | 1. 46 |
| 3. 65 | 0. 74 | 0. 74  | 0. 095 | 1. 48 |        |      |   |       |       |       |
| 225   | 1079  | 90. 0  | 14. 0  | 6. 44 | 0. 095 | 5311 | 0 | 94. 9 | 83. 9 | 1. 48 |
| 3. 69 | 0. 78 | 0. 77  | 0. 095 | 1. 48 |        |      |   |       |       |       |

|      |       |      |       |      |       |      |   |      |      |      |
|------|-------|------|-------|------|-------|------|---|------|------|------|
| 227  | 1081  | 84.8 | 12.4  | 6.86 | 0.095 | 5450 | 0 | 94.9 | 84.3 | 1.49 |
| 3.72 | 0.76  | 0.75 | 0.093 | 1.47 |       |      |   |      |      |      |
| 229  | 1083  | 89.1 | 16.6  | 5.37 | 0.094 | 5341 | 2 | 95.0 | 84.8 | 1.46 |
| 3.75 | 0.79  | 0.78 | 0.093 | 1.46 |       |      |   |      |      |      |
| 231  | 1085  | 97.8 | 14.3  | 6.84 | 0.089 | 5311 | 0 | 95.1 | 85.1 | 1.46 |
| 3.79 | 0.78  | 0.77 | 0.094 | 1.46 |       |      |   |      |      |      |
| 233  | 1087  | 93.7 | 16.2  | 5.79 | 0.093 | 5500 | 0 | 95.2 | 85.4 | 1.46 |
| 3.82 | 0.81  | 0.76 | 0.096 | 1.46 |       |      |   |      |      |      |
| 235  | 1089  | 83.2 | 13.0  | 6.41 | 0.101 | 5298 | 0 | 95.2 | 85.6 | 1.46 |
| 3.85 | 0.79  | 0.78 | 0.098 | 1.46 |       |      |   |      |      |      |
| 237  | 1091  | 86.7 | 37.5  | 2.31 | 0.104 | 5239 | 0 | 95.3 | 85.8 | 1.46 |
| 3.89 | 11.57 | 0.75 | 0.099 | 1.46 |       |      |   |      |      |      |
| 239  | 1093  | 81.5 | 21.7  | 3.75 | 0.104 | 5414 | 1 | 95.4 | 85.9 | 1.46 |
| 3.92 | 0.94  | 0.73 | 0.102 | 1.46 |       |      |   |      |      |      |
| 241  | 1095  | 85.5 | 12.6  | 6.76 | 0.096 | 5313 | 0 | 95.4 | 86.0 | 1.46 |
| 3.95 | 0.75  | 0.75 | 0.102 | 1.46 |       |      |   |      |      |      |
| 243  | 1097  | 74.8 | 11.8  | 6.36 | 0.105 | 5132 | 0 | 95.5 | 86.1 | 1.46 |
| 3.98 | 0.73  | 0.73 | 0.099 | 1.46 |       |      |   |      |      |      |
| 245  | 1099  | 81.2 | 11.8  | 6.86 | 0.100 | 5341 | 0 | 95.5 | 86.3 | 1.48 |
| 4.02 | 0.75  | 0.74 | 0.098 | 1.47 |       |      |   |      |      |      |
| 247  | 1101  | 88.2 | 14.6  | 6.02 | 0.093 | 5304 | 2 | 95.6 | 86.4 | 1.48 |
| 4.05 | 0.74  | 0.74 | 0.100 | 1.47 |       |      |   |      |      |      |
| 249  | 1103  | 83.3 | 12.7  | 6.53 | 0.096 | 5365 | 0 | 95.6 | 86.5 | 1.47 |
| 4.08 | 0.76  | 0.74 | 0.100 | 1.47 |       |      |   |      |      |      |
| 251  | 1105  | 76.7 | 11.6  | 6.62 | 0.107 | 5275 | 1 | 95.7 | 86.6 | 1.46 |
| 4.12 | 0.77  | 0.76 | 0.100 | 1.46 |       |      |   |      |      |      |
| 253  | 1107  | 76.3 | 12.1  | 6.30 | 0.105 | 5170 | 2 | 95.7 | 86.7 | 1.46 |
| 4.15 | 0.73  | 0.73 | 0.103 | 1.46 |       |      |   |      |      |      |
| 255  | 1109  | 78.1 | 12.3  | 6.36 | 0.104 | 5195 | 2 | 95.8 | 86.9 | 1.46 |
| 4.18 | 0.76  | 0.76 | 0.105 | 1.46 |       |      |   |      |      |      |
| 257  | 1111  | 73.2 | 10.4  | 7.04 | 0.105 | 5149 | 0 | 95.8 | 87.0 | 1.46 |
| 4.21 | 0.74  | 0.74 | 0.104 | 1.46 |       |      |   |      |      |      |
| 259  | 1113  | 79.0 | 11.8  | 6.71 | 0.106 | 5285 | 1 | 95.9 | 87.1 | 1.46 |

|       |       |       |        |       |        |      |   |       |       |       |  |
|-------|-------|-------|--------|-------|--------|------|---|-------|-------|-------|--|
| 4. 25 | 0. 79 | 0. 79 | 0. 106 | 1. 46 |        |      |   |       |       |       |  |
| 261   | 1115  | 88. 0 | 13. 8  | 6. 38 | 0. 101 | 5343 | 1 | 95. 9 | 87. 2 | 1. 46 |  |
| 4. 28 | 0. 77 | 0. 76 | 0. 107 | 1. 46 |        |      |   |       |       |       |  |
| 263   | 1117  | 78. 2 | 29. 0  | 2. 70 | 0. 114 | 5235 | 3 | 95. 9 | 87. 3 | 1. 46 |  |
| 4. 31 | 1. 22 | 0. 72 | 0. 108 | 1. 46 |        |      |   |       |       |       |  |
| 265   | 1119  | 72. 4 | 20. 0  | 3. 62 | 0. 112 | 5242 | 0 | 95. 9 | 87. 4 | 1. 46 |  |
| 4. 34 | 6. 89 | 0. 75 | 0. 108 | 1. 46 |        |      |   |       |       |       |  |
| 267   | 1121  | 68. 8 | 12. 4  | 5. 55 | 0. 108 | 5259 | 1 | 96. 0 | 87. 5 | 1. 46 |  |
| 4. 38 | 0. 75 | 0. 75 | 0. 109 | 1. 46 |        |      |   |       |       |       |  |
| 269   | 1123  | 73. 7 | 13. 0  | 5. 65 | 0. 107 | 5257 | 1 | 96. 0 | 87. 6 | 1. 48 |  |
| 4. 41 | 0. 76 | 0. 76 | 0. 109 | 1. 46 |        |      |   |       |       |       |  |
| 271   | 1125  | 77. 3 | 13. 5  | 5. 74 | 0. 104 | 5234 | 0 | 96. 0 | 87. 8 | 1. 46 |  |
| 4. 44 | 0. 73 | 0. 73 | 0. 108 | 1. 46 |        |      |   |       |       |       |  |
| 273   | 1127  | 69. 7 | 15. 7  | 4. 43 | 0. 112 | 5110 | 2 | 96. 0 | 87. 9 | 1. 48 |  |
| 4. 47 | 0. 73 | 0. 73 | 0. 109 | 1. 46 |        |      |   |       |       |       |  |
| 275   | 1129  | 70. 3 | 12. 1  | 5. 80 | 0. 110 | 5305 | 1 | 96. 1 | 88. 0 | 1. 46 |  |
| 4. 50 | 0. 72 | 0. 72 | 0. 113 | 1. 46 |        |      |   |       |       |       |  |
| 277   | 1131  | 71. 0 | 14. 6  | 4. 87 | 0. 114 | 5258 | 1 | 96. 1 | 88. 1 | 1. 46 |  |
| 4. 54 | 0. 76 | 0. 76 | 0. 115 | 1. 46 |        |      |   |       |       |       |  |
| 279   | 1133  | 64. 0 | 23. 5  | 2. 73 | 0. 124 | 5098 | 1 | 96. 1 | 88. 1 | 1. 49 |  |
| 4. 57 | 1. 23 | 0. 75 | 0. 117 | 1. 46 |        |      |   |       |       |       |  |
| 281   | 1135  | 74. 2 | 28. 1  | 2. 64 | 0. 116 | 5278 | 2 | 96. 1 | 88. 2 | 1. 48 |  |
| 4. 60 | 0. 96 | 0. 77 | 0. 118 | 1. 46 |        |      |   |       |       |       |  |
| 283   | 1137  | 61. 6 | 11. 4  | 5. 41 | 0. 124 | 5269 | 1 | 96. 1 | 88. 3 | 1. 47 |  |
| 4. 63 | 0. 78 | 0. 78 | 0. 121 | 1. 47 |        |      |   |       |       |       |  |
| 285   | 1139  | 70. 2 | 12. 6  | 5. 56 | 0. 112 | 5249 | 0 | 96. 1 | 88. 4 | 1. 46 |  |
| 4. 67 | 0. 78 | 0. 77 | 0. 121 | 1. 46 |        |      |   |       |       |       |  |
| 287   | 1141  | 60. 9 | 14. 6  | 4. 18 | 0. 129 | 5133 | 1 | 96. 2 | 88. 4 | 1. 46 |  |
| 4. 70 | 0. 86 | 0. 84 | 0. 123 | 1. 46 |        |      |   |       |       |       |  |
| 289   | 1143  | 59. 6 | 12. 6  | 4. 74 | 0. 127 | 5235 | 0 | 96. 2 | 88. 5 | 1. 46 |  |
| 4. 73 | 0. 83 | 0. 82 | 0. 124 | 1. 46 |        |      |   |       |       |       |  |
| 291   | 1145  | 64. 7 | 21. 9  | 2. 95 | 0. 126 | 5143 | 2 | 96. 2 | 88. 5 | 1. 49 |  |
| 4. 76 | 0. 84 | 0. 83 | 0. 126 | 1. 46 |        |      |   |       |       |       |  |

|      |      |      |       |      |       |      |   |      |      |      |
|------|------|------|-------|------|-------|------|---|------|------|------|
| 293  | 1147 | 65.6 | 13.6  | 4.83 | 0.124 | 5343 | 2 | 96.2 | 88.6 | 1.46 |
| 4.79 | 0.86 | 0.84 | 0.126 | 1.46 |       |      |   |      |      |      |
| 295  | 1149 | 66.6 | 14.0  | 4.78 | 0.125 | 5129 | 1 | 96.2 | 88.6 | 1.46 |
| 4.82 | 0.88 | 0.87 | 0.128 | 1.46 |       |      |   |      |      |      |
| 297  | 1151 | 66.1 | 16.4  | 4.04 | 0.126 | 5215 | 2 | 96.2 | 88.7 | 1.46 |
| 4.86 | 0.92 | 0.91 | 0.131 | 1.46 |       |      |   |      |      |      |
| 299  | 1153 | 57.9 | 14.8  | 3.91 | 0.142 | 5216 | 1 | 96.2 | 88.7 | 1.48 |
| 4.89 | 0.95 | 0.94 | 0.136 | 1.46 |       |      |   |      |      |      |
| 301  | 1155 | 63.5 | 15.9  | 4.00 | 0.138 | 5171 | 1 | 96.2 | 88.8 | 1.46 |
| 4.92 | 1.05 | 1.04 | 0.144 | 1.48 |       |      |   |      |      |      |
| 303  | 1157 | 60.2 | 14.2  | 4.25 | 0.153 | 5199 | 4 | 96.2 | 88.8 | 1.48 |
| 4.95 | 1.12 | 1.11 | 0.151 | 1.48 |       |      |   |      |      |      |
| 305  | 1159 | 64.1 | 17.1  | 3.74 | 0.162 | 5187 | 1 | 96.3 | 88.8 | 1.49 |
| 4.98 | 1.24 | 1.24 | 0.159 | 1.48 |       |      |   |      |      |      |
| 307  | 1161 | 65.4 | 18.1  | 3.60 | 0.159 | 5314 | 2 | 96.3 | 88.9 | 1.48 |
| 5.02 | 1.33 | 1.32 | 0.169 | 1.48 |       |      |   |      |      |      |
| 309  | 1163 | 63.5 | 21.4  | 2.97 | 0.182 | 5189 | 2 | 96.3 | 88.9 | 1.46 |
| 5.05 | 1.53 | 1.49 | 0.180 | 1.48 |       |      |   |      |      |      |
| 311  | 1165 | 62.2 | 21.5  | 2.89 | 0.190 | 5221 | 2 | 96.3 | 89.0 | 1.46 |
| 5.08 | 1.54 | 1.51 | 0.194 | 1.48 |       |      |   |      |      |      |
| 313  | 1167 | 63.7 | 28.6  | 2.23 | 0.208 | 5218 | 4 | 96.3 | 89.0 | 1.49 |
| 5.11 | 1.88 | 1.79 | 0.211 | 1.48 |       |      |   |      |      |      |
| 315  | 1169 | 58.4 | 38.2  | 1.53 | 0.230 | 5216 | 0 | 96.3 | 89.1 | 1.49 |
| 5.14 | 2.20 | 1.89 | 0.229 | 1.49 |       |      |   |      |      |      |
| 317  | 1171 | 60.7 | 26.2  | 2.32 | 0.247 | 5250 | 3 | 96.3 | 89.1 | 1.49 |
| 5.18 | 2.18 | 2.10 | 0.252 | 1.49 |       |      |   |      |      |      |
| 319  | 1173 | 64.4 | 33.9  | 1.90 | 0.271 | 5348 | 2 | 96.3 | 89.2 | 1.49 |
| 5.21 | 2.49 | 2.36 | 0.276 | 1.50 |       |      |   |      |      |      |
| 321  | 1175 | 66.0 | 33.1  | 1.99 | 0.300 | 5232 | 2 | 96.3 | 89.2 | 1.51 |
| 5.24 | 2.88 | 2.72 | 0.306 | 1.50 |       |      |   |      |      |      |
| 323  | 1177 | 69.0 | 36.2  | 1.90 | 0.329 | 5167 | 3 | 96.4 | 89.3 | 1.51 |
| 5.27 | 3.13 | 2.91 | 0.306 | 1.50 |       |      |   |      |      |      |
| 325  | 1179 | 65.4 | 39.5  | 1.66 | 0.387 | 5153 | 2 | 96.4 | 89.3 | 1.50 |

5.31 3.44 3.18 0.306 1.50

\$\$

| N      | Batch | Mn(I)  | RMSdev   | I/rms    | Rmerge | Number | Nrej | Cm%poss | AnoCmp | MaxRes |
|--------|-------|--------|----------|----------|--------|--------|------|---------|--------|--------|
| CMlplc | Chi^2 | Chi^2c | SmRmerge | SmMaxRes |        |        |      |         |        |        |

Correlation coefficients for anomalous differences & I<sub>mean</sub> between random half-datasets  
(CC(1/2))

=====

=====

CC(1/2) values (for I<sub>mean</sub> and anomalous differences) are calculated by splitting the data randomly in half

CC(1/2)<sub>v</sub> for I<sub>mean</sub> is calculated from variances, see Assmann, Brehm & Diederichs (2016), J. Appl. Cryst. 49, 1021–1028)

The RMS Correlation Ratio (RCR) is calculated from a scatter plot of pairs of Delta I (anom)

from the two subsets (halves) by comparing the RMS value (excluding extremes) projected on the line

with slope = 1 ('correlation') with the RMS value perpendicular to this ('error').

This ratio will be > 1 if there is a significant anomalous signal

$R_{split} = (1/\sqrt{2}) \sum (|I_1 - I_2|) / 0.5 * \sum (I_1 + I_2)$  where I<sub>1</sub>, I<sub>2</sub> are the half-dataset intensities as for CC(1/2)

Note that internal R-factors of any sort are deprecated as metrics for assessment of effective resolution

Estimates of maximum resolution for intensities and anomalous differences,  
based on the point at which CC(1/2) falls below a threshold

Curve fitting as suggested by Ed Pozharski to a tanh function

of the form  $(1/2) (1 - \tanh(z))$  where  $z = (s - d_0)/r$ ,

$s = 1/d^2$ ,  $d_0$  is the value of  $s$  at the half-falloff value, and  $r$  controls the

steepness of falloff

Estimate of resolution limit for intensities:

Threshold (see ANALYSIS keyword): 0.30

Resolution limit determined from a curve fit to the function  $(1/2)(1 - \tanh((s - d_0)/r))$ ,  
after rejecting 2 bins

All scores are above the threshold, ie data extends to the maximum resolution of 1.46Å

Estimate of resolution limit for significant anomalous differences:

Threshold (see ANALYSIS keyword): 0.15

Resolution limit determined from a linear fit

All scores are below the threshold, ie there is no apparent anomalous signal from CCanom

\$TABLE: Correlations CC(1/2) within dataset, New:

\$GRAPHS: CC(1/2) v resolution, max resolution 1.46, anom 0.00:0|0.469156x-  
0.387886|1:2, 4, 7, 9, 11, 12:

: RMS anomalous correlation ratio :0|0.469156x0|2.15678:2, 6:

: Rsplit :0|0.469156x0|0.444387:2, 9:

\$\$

| N     | 1/d <sup>2</sup> | Dmid  | CCanom | Nanom | RCRanom | CC1/2 | NCC1/2 | CC1/2v | Rsplit |
|-------|------------------|-------|--------|-------|---------|-------|--------|--------|--------|
| 1     | 0.0078           | 11.31 | 0.649  | 18    | 2.157   | 0.876 | 208    | 0.927  | 0.132  |
| 1.000 | -0.065           |       |        |       |         |       |        |        |        |
| 2     | 0.0235           | 6.53  | 0.212  | 60    | 1.227   | 0.970 | 421    | 0.972  | 0.077  |
| 0.999 | -0.062           |       |        |       |         |       |        |        |        |
| 3     | 0.0391           | 5.06  | -0.136 | 96    | 0.880   | 0.987 | 567    | 0.987  | 0.060  |
| 0.999 | -0.060           |       |        |       |         |       |        |        |        |
| 4     | 0.0547           | 4.27  | -0.057 | 99    | 0.945   | 0.990 | 616    | 0.992  | 0.051  |
| 0.999 | -0.058           |       |        |       |         |       |        |        |        |
| 5     | 0.0704           | 3.77  | -0.131 | 147   | 0.881   | 0.993 | 732    | 0.994  | 0.049  |
| 0.999 | -0.056           |       |        |       |         |       |        |        |        |
| 6     | 0.0860           | 3.41  | -0.388 | 188   | 0.672   | 0.995 | 825    | 0.996  | 0.048  |

|       |        |      |        |      |       |       |      |       |       |
|-------|--------|------|--------|------|-------|-------|------|-------|-------|
| 0.999 | −0.053 |      |        |      |       |       |      |       |       |
| 7     | 0.1017 | 3.14 | 0.116  | 314  | 1.121 | 0.992 | 1077 | 0.995 | 0.057 |
| 0.998 | −0.051 |      |        |      |       |       |      |       |       |
| 8     | 0.1173 | 2.92 | −0.150 | 562  | 0.862 | 0.992 | 1449 | 0.996 | 0.058 |
| 0.998 | −0.049 |      |        |      |       |       |      |       |       |
| 9     | 0.1329 | 2.74 | −0.007 | 843  | 0.993 | 0.991 | 1739 | 0.994 | 0.060 |
| 0.997 | −0.047 |      |        |      |       |       |      |       |       |
| 10    | 0.1486 | 2.59 | 0.074  | 1179 | 1.077 | 0.989 | 2026 | 0.992 | 0.061 |
| 0.996 | −0.045 |      |        |      |       |       |      |       |       |
| 11    | 0.1642 | 2.47 | −0.089 | 1456 | 0.915 | 0.988 | 2283 | 0.992 | 0.060 |
| 0.996 | −0.042 |      |        |      |       |       |      |       |       |
| 12    | 0.1798 | 2.36 | −0.024 | 1662 | 0.976 | 0.987 | 2415 | 0.990 | 0.063 |
| 0.995 | −0.040 |      |        |      |       |       |      |       |       |
| 13    | 0.1955 | 2.26 | −0.070 | 1986 | 0.932 | 0.986 | 2602 | 0.990 | 0.064 |
| 0.993 | −0.038 |      |        |      |       |       |      |       |       |
| 14    | 0.2111 | 2.18 | −0.045 | 2205 | 0.956 | 0.986 | 2714 | 0.989 | 0.066 |
| 0.992 | −0.036 |      |        |      |       |       |      |       |       |
| 15    | 0.2268 | 2.10 | −0.009 | 2470 | 0.991 | 0.983 | 2900 | 0.986 | 0.068 |
| 0.990 | −0.033 |      |        |      |       |       |      |       |       |
| 16    | 0.2424 | 2.03 | −0.035 | 2570 | 0.966 | 0.988 | 2955 | 0.990 | 0.069 |
| 0.987 | −0.031 |      |        |      |       |       |      |       |       |
| 17    | 0.2580 | 1.97 | −0.050 | 2692 | 0.952 | 0.986 | 3083 | 0.988 | 0.077 |
| 0.984 | −0.029 |      |        |      |       |       |      |       |       |
| 18    | 0.2737 | 1.91 | −0.007 | 2808 | 0.994 | 0.985 | 3166 | 0.985 | 0.085 |
| 0.980 | −0.027 |      |        |      |       |       |      |       |       |
| 19    | 0.2893 | 1.86 | −0.021 | 2458 | 0.979 | 0.977 | 3175 | 0.979 | 0.107 |
| 0.975 | −0.025 |      |        |      |       |       |      |       |       |
| 20    | 0.3050 | 1.81 | −0.012 | 2535 | 0.988 | 0.970 | 3256 | 0.973 | 0.122 |
| 0.969 | −0.022 |      |        |      |       |       |      |       |       |
| 21    | 0.3206 | 1.77 | −0.037 | 2314 | 0.964 | 0.961 | 3350 | 0.966 | 0.139 |
| 0.962 | −0.020 |      |        |      |       |       |      |       |       |
| 22    | 0.3362 | 1.72 | 0.015  | 2432 | 1.015 | 0.951 | 3471 | 0.955 | 0.158 |
| 0.953 | −0.018 |      |        |      |       |       |      |       |       |

|          |           |        |        |         |       |        |        |         |       |
|----------|-----------|--------|--------|---------|-------|--------|--------|---------|-------|
| 23       | 0.3519    | 1.69   | -0.004 | 2794    | 0.996 | 0.948  | 3564   | 0.952   | 0.179 |
| 0.942    | -0.016    |        |        |         |       |        |        |         |       |
| 24       | 0.3675    | 1.65   | -0.040 | 2940    | 0.961 | 0.937  | 3655   | 0.942   | 0.199 |
| 0.929    | -0.013    |        |        |         |       |        |        |         |       |
| 25       | 0.3831    | 1.62   | -0.016 | 3115    | 0.985 | 0.924  | 3760   | 0.929   | 0.222 |
| 0.913    | -0.011    |        |        |         |       |        |        |         |       |
| 26       | 0.3988    | 1.58   | 0.046  | 3211    | 1.047 | 0.894  | 3780   | 0.900   | 0.263 |
| 0.894    | -0.009    |        |        |         |       |        |        |         |       |
| 27       | 0.4144    | 1.55   | -0.004 | 3353    | 0.996 | 0.865  | 3897   | 0.876   | 0.298 |
| 0.872    | -0.007    |        |        |         |       |        |        |         |       |
| 28       | 0.4301    | 1.52   | -0.004 | 3488    | 0.996 | 0.836  | 3968   | 0.848   | 0.329 |
| 0.845    | -0.005    |        |        |         |       |        |        |         |       |
| 29       | 0.4457    | 1.50   | 0.013  | 3553    | 1.013 | 0.818  | 4025   | 0.828   | 0.359 |
| 0.814    | -0.002    |        |        |         |       |        |        |         |       |
| 30       | 0.4613    | 1.47   | -0.049 | 3633    | 0.953 | 0.738  | 4103   | 0.760   | 0.444 |
| 0.779    | -0.000    |        |        |         |       |        |        |         |       |
| \$\$     |           |        |        |         |       |        |        |         |       |
| Overall: |           | -0.026 | 57181  | 0.974   | 0.989 | 75782  | 0.955  | 0.082   |       |
|          |           | CCanom | Nanom  | RCRanom | CC1/2 | NCC1/2 | CC1/2v | Rsplitt |       |
| CCfit    | CCanomfit |        |        |         |       |        |        |         |       |

#### Analysis of anisotropy of data

=====

Mn(I/sd) and half-dataset correlation coefficients CC(1/2) are analysed by resolution within an maxangle of 20 degrees of principal axes of anisotropy weighted according to angle,  $w = [\cos(\text{angle}) - \cos(\text{maxangle})] / [1 - \cos(\text{maxangle})]$ ,

Principal axes are along a\*, b\*, c\*

Eigenvalues of [B] (orth) along principal axes :    0.810    -2.296    1.486  
 Difference between maximum and minimum anisotropic B (= 8 pi^2 U)    3.8

Estimated maximum resolution limits, a\*: 1.46, b\*: 1.46, c\*: 1.46

Columns 'CCft' are values from curve-fitting as for overall analysis

\$TABLE: Anisotropy analysis of CC(1/2) and I/sd, New:

\$GRAPHS: Anisotropic CC(1/2) v resolution:0|0.469156x0|1:2, 4, 5, 6, 13, 14, 15:

: Anisotropic Mn(I/sd) v resolution:0|0.469156x0|20.5826:2, 7, 8, 9:

: Projected CC(1/2) v resolution:0|0.469156x0|1:2, 10, 11, 12:

\$\$

| N    | 1/d <sup>2</sup> | Dmid    | CC:a*   | CC:b*  | CC:c* | I/sd:a* | I/sd:b* | I/sd:c* | CCp1  | CCp2  |
|------|------------------|---------|---------|--------|-------|---------|---------|---------|-------|-------|
| CCp3 | CCft:a*          | CCft:b* | CCft:c* | \$\$\$ |       |         |         |         |       |       |
| 1    | 0.0078           | 11.31   | 0.798   | 0.798  | 0.798 | 19.60   | 19.60   | 19.60   | 0.985 | 0.983 |
|      | 0.982            | 0.999   | 1.000   | 0.999  |       |         |         |         |       |       |
| 2    | 0.0235           | 6.53    | 0.999   | 0.780  | 0.999 | 13.14   | 18.81   | 11.39   | 0.994 | 0.993 |
|      | 0.995            | 0.999   | 1.000   | 0.999  |       |         |         |         |       |       |
| 3    | 0.0391           | 5.06    | 1.000   | 0.968  | 0.998 | 12.08   | 19.25   | 12.91   | 0.994 | 0.989 |
|      | 0.995            | 0.998   | 1.000   | 0.998  |       |         |         |         |       |       |
| 4    | 0.0547           | 4.27    | 0.994   | 0.994  | 0.998 | 13.15   | 18.45   | 12.81   | 0.995 | 0.995 |
|      | 0.995            | 0.998   | 1.000   | 0.998  |       |         |         |         |       |       |
| 5    | 0.0704           | 3.77    | 0.975   | 0.993  | 0.995 | 13.72   | 17.97   | 11.64   | 0.990 | 0.994 |
|      | 0.995            | 0.998   | 1.000   | 0.998  |       |         |         |         |       |       |
| 6    | 0.0860           | 3.41    | 0.989   | 0.997  | 0.978 | 12.10   | 16.74   | 9.97    | 0.989 | 0.991 |
|      | 0.994            | 0.997   | 0.999   | 0.997  |       |         |         |         |       |       |
| 7    | 0.1017           | 3.14    | 0.977   | 0.992  | 0.984 | 9.72    | 16.08   | 10.10   | 0.987 | 0.988 |
|      | 0.993            | 0.996   | 0.999   | 0.997  |       |         |         |         |       |       |
| 8    | 0.1173           | 2.92    | 0.973   | 0.994  | 0.995 | 10.78   | 18.91   | 10.38   | 0.982 | 0.992 |
|      | 0.989            | 0.995   | 0.999   | 0.996  |       |         |         |         |       |       |
| 9    | 0.1329           | 2.74    | 0.976   | 0.995  | 0.983 | 10.82   | 20.58   | 10.90   | 0.985 | 0.993 |
|      | 0.991            | 0.994   | 0.999   | 0.996  |       |         |         |         |       |       |
| 10   | 0.1486           | 2.59    | 0.984   | 0.995  | 0.984 | 11.93   | 20.22   | 10.52   | 0.985 | 0.991 |
|      | 0.991            | 0.993   | 0.998   | 0.995  |       |         |         |         |       |       |
| 11   | 0.1642           | 2.47    | 0.974   | 0.994  | 0.993 | 12.58   | 19.52   | 10.56   | 0.986 | 0.991 |

|       |        |       |       |       |       |       |       |       |       |       |
|-------|--------|-------|-------|-------|-------|-------|-------|-------|-------|-------|
| 0.991 | 0.991  | 0.998 | 0.994 |       |       |       |       |       |       |       |
| 12    | 0.1798 | 2.36  | 0.983 | 0.994 | 0.983 | 11.36 | 18.15 | 11.14 | 0.983 | 0.989 |
| 0.989 | 0.989  | 0.997 | 0.992 |       |       |       |       |       |       |       |
| 13    | 0.1955 | 2.26  | 0.986 | 0.985 | 0.986 | 10.89 | 18.34 | 11.40 | 0.985 | 0.988 |
| 0.986 | 0.987  | 0.996 | 0.991 |       |       |       |       |       |       |       |
| 14    | 0.2111 | 2.18  | 0.978 | 0.995 | 0.983 | 11.75 | 18.60 | 12.04 | 0.984 | 0.991 |
| 0.983 | 0.984  | 0.995 | 0.989 |       |       |       |       |       |       |       |
| 15    | 0.2268 | 2.10  | 0.988 | 0.992 | 0.976 | 10.62 | 16.90 | 11.47 | 0.977 | 0.984 |
| 0.985 | 0.980  | 0.994 | 0.987 |       |       |       |       |       |       |       |
| 16    | 0.2424 | 2.03  | 0.987 | 0.992 | 0.985 | 9.75  | 15.89 | 10.90 | 0.973 | 0.980 |
| 0.978 | 0.975  | 0.992 | 0.985 |       |       |       |       |       |       |       |
| 17    | 0.2580 | 1.97  | 0.982 | 0.991 | 0.984 | 8.39  | 15.11 | 10.96 | 0.956 | 0.977 |
| 0.975 | 0.970  | 0.990 | 0.982 |       |       |       |       |       |       |       |
| 18    | 0.2737 | 1.91  | 0.975 | 0.992 | 0.986 | 8.14  | 13.70 | 10.21 | 0.948 | 0.956 |
| 0.948 | 0.963  | 0.987 | 0.979 |       |       |       |       |       |       |       |
| 19    | 0.2893 | 1.86  | 0.972 | 0.970 | 0.965 | 6.56  | 8.74  | 7.39  | 0.954 | 0.939 |
| 0.948 | 0.954  | 0.983 | 0.974 |       |       |       |       |       |       |       |
| 20    | 0.3050 | 1.81  | 0.965 | 0.971 | 0.937 | 6.33  | 8.21  | 7.57  | 0.916 | 0.931 |
| 0.942 | 0.944  | 0.978 | 0.970 |       |       |       |       |       |       |       |
| 21    | 0.3206 | 1.77  | 0.963 | 0.975 | 0.947 | 5.11  | 8.44  | 7.37  | 0.923 | 0.925 |
| 0.930 | 0.931  | 0.972 | 0.964 |       |       |       |       |       |       |       |
| 22    | 0.3362 | 1.72  | 0.901 | 0.946 | 0.958 | 3.50  | 7.20  | 7.02  | 0.871 | 0.907 |
| 0.927 | 0.916  | 0.965 | 0.958 |       |       |       |       |       |       |       |
| 23    | 0.3519 | 1.69  | 0.905 | 0.958 | 0.940 | 3.85  | 6.55  | 7.03  | 0.827 | 0.888 |
| 0.907 | 0.898  | 0.955 | 0.950 |       |       |       |       |       |       |       |
| 24    | 0.3675 | 1.65  | 0.838 | 0.966 | 0.942 | 3.70  | 6.19  | 6.75  | 0.763 | 0.926 |
| 0.916 | 0.877  | 0.943 | 0.941 |       |       |       |       |       |       |       |
| 25    | 0.3831 | 1.62  | 0.832 | 0.944 | 0.946 | 3.52  | 5.70  | 6.70  | 0.718 | 0.868 |
| 0.885 | 0.852  | 0.928 | 0.930 |       |       |       |       |       |       |       |
| 26    | 0.3988 | 1.58  | 0.740 | 0.882 | 0.906 | 2.66  | 3.85  | 5.68  | 0.709 | 0.888 |
| 0.862 | 0.823  | 0.909 | 0.918 |       |       |       |       |       |       |       |
| 27    | 0.4144 | 1.55  | 0.774 | 0.913 | 0.889 | 2.63  | 3.87  | 4.65  | 0.720 | 0.802 |
| 0.870 | 0.789  | 0.885 | 0.904 |       |       |       |       |       |       |       |

|       |        |       |       |       |       |      |      |      |       |       |
|-------|--------|-------|-------|-------|-------|------|------|------|-------|-------|
| 28    | 0.4301 | 1.52  | 0.780 | 0.847 | 0.924 | 2.64 | 3.61 | 4.93 | 0.824 | 0.793 |
| 0.925 | 0.751  | 0.857 | 0.887 |       |       |      |      |      |       |       |
| 29    | 0.4457 | 1.50  | 0.813 | 0.817 | 0.901 | 2.37 | 3.12 | 4.32 | 0.446 | 0.700 |
| 0.884 | 0.709  | 0.823 | 0.868 |       |       |      |      |      |       |       |
| 30    | 0.4613 | 1.47  | 0.585 | 0.685 | 0.823 | 1.90 | 2.32 | 3.23 | 0.705 | 0.706 |
| 0.895 | 0.663  | 0.783 | 0.847 |       |       |      |      |      |       |       |

\$\$

|          |     |     |       |       |       |      |       |      |       |       |
|----------|-----|-----|-------|-------|-------|------|-------|------|-------|-------|
| Overall: |     |     | 0.976 | 0.976 | 0.966 | 7.64 | 11.64 | 8.92 | 0.989 | 0.989 |
| 0.989    | 0.0 | 0.0 | 0.0   |       |       |      |       |      |       |       |

CC:a\* CC:b\* CC:c\* I/sd:a\* I/sd:b\* I/sd:c\* CCp1 CCp2  
CCp3 CCft:a\* CCft:b\* CCft:c\*

Cumulative CC(1/2) analysed by Batch for each dataset

=====

Analysis by Batch is in groups of batches, group width 1.00 degrees, 2 batches/group

\$TABLE: Cumulative CC(1/2) in resolution ranges vs. Batch:

\$GRAPHS: Cumulative CC(1/2) :N:1, 4, 5, 6, 7:

\$\$

| N  | Run | Batch | 3.26-2.31 | 2.31-1.88 | 1.88-1.63 | 1.63-1.46 | \$\$ | \$\$ |
|----|-----|-------|-----------|-----------|-----------|-----------|------|------|
| 1  | 1   | 1     | -         | -         | -         | -         |      |      |
| 3  | 1   | 3     | 0.82      | 0.98      | 0.91      | 0.82      |      |      |
| 5  | 1   | 5     | 0.82      | 0.98      | 0.91      | 0.69      |      |      |
| 7  | 1   | 7     | 0.99      | 0.98      | 0.92      | 0.79      |      |      |
| 9  | 1   | 9     | 0.82      | 0.97      | 0.88      | 0.73      |      |      |
| 11 | 1   | 11    | 0.97      | 0.96      | 0.87      | 0.80      |      |      |
| 13 | 1   | 13    | 0.99      | 0.98      | 0.92      | 0.71      |      |      |
| 15 | 1   | 15    | 0.99      | 0.97      | 0.91      | 0.76      |      |      |
| 17 | 1   | 17    | 0.99      | 0.98      | 0.90      | 0.75      |      |      |
| 19 | 1   | 19    | 0.99      | 0.98      | 0.90      | 0.74      |      |      |

|    |   |    |      |      |      |      |
|----|---|----|------|------|------|------|
| 21 | 1 | 21 | 0.99 | 0.97 | 0.91 | 0.74 |
| 23 | 1 | 23 | 0.99 | 0.98 | 0.91 | 0.73 |
| 25 | 1 | 25 | 0.99 | 0.98 | 0.93 | 0.74 |
| 27 | 1 | 27 | 0.99 | 0.98 | 0.93 | 0.79 |
| 29 | 1 | 29 | 0.99 | 0.98 | 0.93 | 0.74 |
| 31 | 1 | 31 | 0.99 | 0.98 | 0.93 | 0.68 |
| 33 | 1 | 33 | 0.99 | 0.98 | 0.95 | 0.77 |
| 35 | 1 | 35 | 1.00 | 0.98 | 0.93 | 0.75 |
| 37 | 1 | 37 | 0.99 | 0.98 | 0.94 | 0.82 |
| 39 | 1 | 39 | 0.99 | 0.98 | 0.93 | 0.81 |
| 41 | 1 | 41 | 0.99 | 0.98 | 0.94 | 0.78 |
| 43 | 1 | 43 | 0.99 | 0.98 | 0.94 | 0.81 |
| 45 | 1 | 45 | 0.99 | 0.99 | 0.92 | 0.76 |
| 47 | 1 | 47 | 0.99 | 0.98 | 0.93 | 0.79 |
| 49 | 1 | 49 | 0.99 | 0.98 | 0.94 | 0.77 |
| 51 | 1 | 51 | 0.99 | 0.98 | 0.95 | 0.73 |
| 53 | 1 | 53 | 0.99 | 0.98 | 0.94 | 0.73 |
| 55 | 1 | 55 | 0.99 | 0.98 | 0.93 | 0.77 |
| 57 | 1 | 57 | 0.99 | 0.98 | 0.92 | 0.80 |
| 59 | 1 | 59 | 1.00 | 0.98 | 0.94 | 0.75 |
| 61 | 1 | 61 | 0.99 | 0.98 | 0.93 | 0.75 |
| 63 | 1 | 63 | 0.99 | 0.99 | 0.94 | 0.76 |
| 65 | 1 | 65 | 0.99 | 0.99 | 0.93 | 0.76 |
| 67 | 1 | 67 | 0.99 | 0.98 | 0.93 | 0.73 |
| 69 | 1 | 69 | 0.99 | 0.98 | 0.93 | 0.73 |
| 71 | 1 | 71 | 0.99 | 0.98 | 0.93 | 0.80 |
| 73 | 1 | 73 | 0.99 | 0.98 | 0.94 | 0.76 |
| 75 | 1 | 75 | 0.99 | 0.98 | 0.93 | 0.72 |
| 77 | 1 | 77 | 0.99 | 0.98 | 0.94 | 0.78 |
| 79 | 1 | 79 | 0.99 | 0.99 | 0.95 | 0.73 |
| 81 | 1 | 81 | 0.99 | 0.98 | 0.93 | 0.72 |
| 83 | 1 | 83 | 0.99 | 0.99 | 0.93 | 0.77 |
| 85 | 1 | 85 | 0.99 | 0.98 | 0.93 | 0.75 |

|     |   |     |      |      |      |      |
|-----|---|-----|------|------|------|------|
| 87  | 1 | 87  | 0.99 | 0.98 | 0.94 | 0.80 |
| 89  | 1 | 89  | 0.99 | 0.99 | 0.94 | 0.74 |
| 91  | 1 | 91  | 0.99 | 0.99 | 0.94 | 0.78 |
| 93  | 1 | 93  | 0.99 | 0.99 | 0.95 | 0.78 |
| 95  | 1 | 95  | 0.99 | 0.98 | 0.94 | 0.77 |
| 97  | 1 | 97  | 0.99 | 0.99 | 0.93 | 0.73 |
| 99  | 1 | 99  | 0.99 | 0.98 | 0.93 | 0.76 |
| 101 | 1 | 101 | 0.99 | 0.98 | 0.95 | 0.79 |
| 103 | 1 | 103 | 0.99 | 0.99 | 0.95 | 0.70 |
| 105 | 1 | 105 | 0.99 | 0.99 | 0.93 | 0.74 |
| 107 | 1 | 107 | 0.99 | 0.98 | 0.94 | 0.77 |
| 109 | 1 | 109 | 0.99 | 0.99 | 0.93 | 0.72 |
| 111 | 1 | 111 | 0.99 | 0.99 | 0.93 | 0.69 |
| 113 | 1 | 113 | 0.99 | 0.98 | 0.95 | 0.75 |
| 115 | 1 | 115 | 0.99 | 0.99 | 0.95 | 0.74 |
| 117 | 1 | 117 | 0.99 | 0.99 | 0.95 | 0.77 |
| 119 | 1 | 119 | 0.99 | 0.99 | 0.92 | 0.72 |
| 121 | 1 | 121 | 0.99 | 0.99 | 0.94 | 0.72 |
| 123 | 1 | 123 | 0.99 | 0.98 | 0.94 | 0.71 |
| 125 | 1 | 125 | 0.99 | 0.99 | 0.93 | 0.74 |
| 127 | 1 | 127 | 0.99 | 0.99 | 0.92 | 0.71 |
| 129 | 1 | 129 | 0.99 | 0.99 | 0.92 | 0.75 |
| 131 | 1 | 131 | 0.99 | 0.99 | 0.93 | 0.74 |
| 133 | 1 | 133 | 0.99 | 0.98 | 0.94 | 0.72 |
| 135 | 1 | 135 | 0.99 | 0.98 | 0.94 | 0.78 |
| 137 | 1 | 137 | 0.99 | 0.99 | 0.95 | 0.76 |
| 139 | 1 | 139 | 0.99 | 0.98 | 0.93 | 0.74 |
| 141 | 1 | 141 | 0.99 | 0.98 | 0.94 | 0.73 |
| 143 | 1 | 143 | 0.99 | 0.98 | 0.93 | 0.72 |
| 145 | 1 | 145 | 0.99 | 0.98 | 0.95 | 0.73 |
| 147 | 1 | 147 | 0.99 | 0.99 | 0.95 | 0.77 |
| 149 | 1 | 149 | 0.99 | 0.99 | 0.94 | 0.77 |
| 151 | 1 | 151 | 0.99 | 0.99 | 0.94 | 0.75 |

|     |   |      |      |      |      |      |
|-----|---|------|------|------|------|------|
| 153 | 1 | 153  | 0.99 | 0.98 | 0.95 | 0.75 |
| 155 | 1 | 155  | 0.99 | 0.98 | 0.95 | 0.75 |
| 157 | 1 | 157  | 0.99 | 0.98 | 0.94 | 0.75 |
| 159 | 1 | 159  | 0.99 | 0.98 | 0.93 | 0.75 |
| 161 | 1 | 161  | 0.99 | 0.98 | 0.94 | 0.76 |
| 163 | 1 | 163  | 0.98 | 0.98 | 0.93 | 0.78 |
| 165 | 1 | 165  | 0.99 | 0.98 | 0.94 | 0.72 |
| 167 | 1 | 167  | 0.97 | 0.98 | 0.95 | 0.76 |
| 169 | 1 | 169  | 0.98 | 0.98 | 0.94 | 0.79 |
| 171 | 1 | 171  | 0.98 | 0.98 | 0.94 | 0.75 |
| 173 | 1 | 173  | 0.98 | 0.98 | 0.94 | 0.77 |
| 175 | 1 | 175  | 0.97 | 0.98 | 0.94 | 0.75 |
| 177 | 1 | 177  | 0.97 | 0.98 | 0.94 | 0.69 |
| 179 | 1 | 179  | 0.98 | 0.98 | 0.93 | 0.72 |
| 181 | 2 | 1035 | 0.99 | 0.98 | 0.95 | 0.77 |
| 183 | 2 | 1037 | 0.98 | 0.98 | 0.95 | 0.79 |
| 185 | 2 | 1039 | 0.99 | 0.99 | 0.95 | 0.77 |
| 187 | 2 | 1041 | 0.99 | 0.99 | 0.95 | 0.80 |
| 189 | 2 | 1043 | 0.99 | 0.99 | 0.95 | 0.78 |
| 191 | 2 | 1045 | 0.99 | 0.99 | 0.96 | 0.78 |
| 193 | 2 | 1047 | 0.99 | 0.99 | 0.96 | 0.81 |
| 195 | 2 | 1049 | 0.99 | 0.99 | 0.95 | 0.79 |
| 197 | 2 | 1051 | 1.00 | 0.99 | 0.96 | 0.83 |
| 199 | 2 | 1053 | 1.00 | 0.99 | 0.96 | 0.84 |
| 201 | 2 | 1055 | 1.00 | 0.99 | 0.96 | 0.79 |
| 203 | 2 | 1057 | 1.00 | 0.99 | 0.95 | 0.81 |
| 205 | 2 | 1059 | 0.99 | 0.99 | 0.97 | 0.81 |
| 207 | 2 | 1061 | 1.00 | 0.99 | 0.96 | 0.82 |
| 209 | 2 | 1063 | 0.99 | 0.99 | 0.97 | 0.81 |
| 211 | 2 | 1065 | 0.99 | 0.99 | 0.96 | 0.84 |
| 213 | 2 | 1067 | 1.00 | 0.99 | 0.96 | 0.84 |
| 215 | 2 | 1069 | 0.99 | 0.99 | 0.96 | 0.85 |
| 217 | 2 | 1071 | 0.99 | 0.99 | 0.96 | 0.82 |

|     |   |      |      |      |      |      |
|-----|---|------|------|------|------|------|
| 219 | 2 | 1073 | 0.99 | 0.99 | 0.96 | 0.85 |
| 221 | 2 | 1075 | 0.99 | 0.99 | 0.96 | 0.84 |
| 223 | 2 | 1077 | 0.99 | 0.99 | 0.96 | 0.86 |
| 225 | 2 | 1079 | 0.99 | 0.99 | 0.96 | 0.84 |
| 227 | 2 | 1081 | 1.00 | 0.99 | 0.96 | 0.83 |
| 229 | 2 | 1083 | 0.99 | 0.99 | 0.96 | 0.83 |
| 231 | 2 | 1085 | 0.99 | 0.99 | 0.97 | 0.82 |
| 233 | 2 | 1087 | 0.99 | 0.99 | 0.97 | 0.87 |
| 235 | 2 | 1089 | 0.99 | 0.99 | 0.96 | 0.84 |
| 237 | 2 | 1091 | 0.99 | 0.99 | 0.96 | 0.86 |
| 239 | 2 | 1093 | 0.99 | 0.99 | 0.96 | 0.80 |
| 241 | 2 | 1095 | 0.99 | 0.99 | 0.97 | 0.82 |
| 243 | 2 | 1097 | 0.99 | 0.99 | 0.97 | 0.85 |
| 245 | 2 | 1099 | 0.99 | 0.99 | 0.96 | 0.83 |
| 247 | 2 | 1101 | 0.99 | 0.99 | 0.97 | 0.85 |
| 249 | 2 | 1103 | 0.99 | 0.99 | 0.96 | 0.84 |
| 251 | 2 | 1105 | 0.99 | 0.99 | 0.97 | 0.82 |
| 253 | 2 | 1107 | 0.99 | 0.99 | 0.97 | 0.85 |
| 255 | 2 | 1109 | 0.99 | 0.99 | 0.97 | 0.79 |
| 257 | 2 | 1111 | 1.00 | 0.99 | 0.97 | 0.84 |
| 259 | 2 | 1113 | 0.99 | 0.99 | 0.96 | 0.85 |
| 261 | 2 | 1115 | 0.99 | 0.99 | 0.98 | 0.86 |
| 263 | 2 | 1117 | 0.99 | 0.99 | 0.97 | 0.84 |
| 265 | 2 | 1119 | 0.99 | 0.99 | 0.97 | 0.87 |
| 267 | 2 | 1121 | 1.00 | 0.99 | 0.98 | 0.84 |
| 269 | 2 | 1123 | 1.00 | 0.99 | 0.97 | 0.87 |
| 271 | 2 | 1125 | 1.00 | 0.99 | 0.98 | 0.88 |
| 273 | 2 | 1127 | 1.00 | 0.99 | 0.97 | 0.89 |
| 275 | 2 | 1129 | 0.99 | 0.99 | 0.98 | 0.89 |
| 277 | 2 | 1131 | 1.00 | 0.99 | 0.97 | 0.87 |
| 279 | 2 | 1133 | 0.99 | 0.99 | 0.98 | 0.86 |
| 281 | 2 | 1135 | 0.99 | 0.99 | 0.96 | 0.88 |
| 283 | 2 | 1137 | 0.99 | 0.99 | 0.97 | 0.88 |

|     |   |      |      |      |      |      |
|-----|---|------|------|------|------|------|
| 285 | 2 | 1139 | 0.99 | 0.99 | 0.98 | 0.89 |
| 287 | 2 | 1141 | 0.99 | 0.99 | 0.98 | 0.89 |
| 289 | 2 | 1143 | 0.99 | 0.99 | 0.97 | 0.87 |
| 291 | 2 | 1145 | 0.99 | 0.99 | 0.97 | 0.86 |
| 293 | 2 | 1147 | 0.99 | 0.99 | 0.97 | 0.87 |
| 295 | 2 | 1149 | 0.99 | 0.99 | 0.97 | 0.90 |
| 297 | 2 | 1151 | 0.99 | 0.99 | 0.97 | 0.87 |
| 299 | 2 | 1153 | 0.99 | 0.99 | 0.97 | 0.90 |
| 301 | 2 | 1155 | 0.99 | 0.99 | 0.97 | 0.87 |
| 303 | 2 | 1157 | 0.99 | 0.99 | 0.97 | 0.86 |
| 305 | 2 | 1159 | 0.99 | 0.99 | 0.97 | 0.90 |
| 307 | 2 | 1161 | 0.99 | 0.99 | 0.97 | 0.89 |
| 309 | 2 | 1163 | 0.99 | 0.99 | 0.97 | 0.87 |
| 311 | 2 | 1165 | 0.99 | 0.99 | 0.96 | 0.87 |
| 313 | 2 | 1167 | 0.99 | 0.99 | 0.96 | 0.85 |
| 315 | 2 | 1169 | 0.99 | 0.99 | 0.96 | 0.87 |
| 317 | 2 | 1171 | 0.99 | 0.99 | 0.97 | 0.86 |
| 319 | 2 | 1173 | 0.98 | 0.97 | 0.96 | 0.86 |
| 321 | 2 | 1175 | 0.98 | 0.98 | 0.95 | 0.87 |
| 323 | 2 | 1177 | 0.97 | 0.97 | 0.95 | 0.85 |
| 325 | 2 | 1179 | 0.98 | 0.97 | 0.95 | 0.84 |

\$\$

N Run Batch 3. 26-2. 31 2. 31-1. 88 1. 88-1. 63 1. 63-1. 46

Analysis by 4sinTheta/Lambda<sup>2</sup> bins (all statistics use Mn(I+), Mn(I-) etc)

=====

Rmrg :- conventional Rmerge = Sum(|Ih| - < Ih >)/Sum(< Ih >)

Rcum :- Rmrg up to this range

Rfull :- Rmrg for fully-recorded observations only

Rmeas :- multiplicity-independent R = Sum(Sqrt(N/(N-1)) (|Ih| - < Ih >))/Sum(< Ih >)

Rpim :- Precision-indicating R = Sum(Sqrt(1/(N-1)) (|Ih| - < Ih >))/Sum(< Ih >)

Nmeas :- Number of observations used in statistics  
 AvI :- unmerged Ihl averaged in bin < Ihl >  
 RMSdev :- rms scatter of observations from mean < Ih >  
 I/RMS :- < Ihl > / rms scatter = Av\_I/RMSdev  
 sd :- average standard deviation derived from experimental SDs, after  
         application of SdFac SdB SdAdd 'correction' terms  
 Mn(I/sd):- average < merged< Ih >/sd(< Ih >) > ~= signal/noise  
 Frcbias :- partial bias = Mean( Mn(If) - Ip )/Mean( Mn(I) )  
         for mixed sets only (If is a full if present, else the  
         partial with the smallest number of parts)  
 Chi^2 :- mean goodness of fit, all data  
 Chi^2c :- mean goodness of fit, excluding large differences

All statistics in this table are relative to the overall mean I+/- (anomalous off)

Mean Chi^2 values are calculated for all data, and also

excluding observations with large deviations >5sd, including for reflections measured only twice

\$TABLE: Analysis against resolution, New:

\$GRAPHS:I/sigma, Mean Mn(I)/sd(Mn(I)):0|0.469156x0|19.6041:2,13,14:

:Filtered Mean(Chi^2) (<5sd) v Resolution:N:2,17:

:Mean(Chi^2), Mean(Chi^2) (<5sd) v Resolution:N:2,16,17:

:Rmerge, Rfull, Rmeas, Rpim v Resolution:0|0.469156x0|0.812081:2,4,5,7,8:

:Average I, RMSdeviation and Sd:0|0.469156x0|869.162:2,10,11,12:

:Fractional bias:0|0.469156x-0.0821763|0.312209:2,15:

\$\$

| N     | 1/d^2    | Dmid    | Rmrg   | Rfull  | Rcum   | Rmeas | Rpim  | Nmeas | AvI | RMSdev | sd |
|-------|----------|---------|--------|--------|--------|-------|-------|-------|-----|--------|----|
| I/RMS | Mn(I/sd) | FrcBias | Chi^2  | Chi^2c | \$\$\$ |       |       |       |     |        |    |
| 1     | 0.0078   | 11.31   | 0.094  | 0.075  | 0.094  | 0.127 | 0.085 | 563   | 814 | 207    | 55 |
| 3.9   | 19.6     | 0.312   | 230.18 | 1.38   |        |       |       |       |     |        |    |
| 2     | 0.0235   | 6.53    | 0.060  | 0.085  | 0.073  | 0.077 | 0.048 | 1260  | 520 | 85     | 37 |
| 6.1   | 18.3     | 0.083   | 46.06  | 1.21   |        |       |       |       |     |        |    |

|      |        |        |       |       |       |       |       |       |     |    |    |
|------|--------|--------|-------|-------|-------|-------|-------|-------|-----|----|----|
| 3    | 0.0391 | 5.06   | 0.049 | 0.080 | 0.060 | 0.063 | 0.039 | 1716  | 757 | 79 | 54 |
| 9.5  | 18.0   | -0.015 | 1.90  | 1.06  |       |       |       |       |     |    |    |
| 4    | 0.0547 | 4.27   | 0.044 | 0.081 | 0.053 | 0.056 | 0.034 | 1908  | 869 | 71 | 63 |
| 12.2 | 18.1   | -0.015 | 1.04  | 0.97  |       |       |       |       |     |    |    |
| 5    | 0.0704 | 3.77   | 0.041 | 0.088 | 0.050 | 0.053 | 0.032 | 2341  | 735 | 54 | 54 |
| 13.5 | 17.6   | -0.029 | 1.03  | 0.89  |       |       |       |       |     |    |    |
| 6    | 0.0860 | 3.41   | 0.045 | 0.089 | 0.049 | 0.057 | 0.034 | 2836  | 443 | 33 | 35 |
| 13.4 | 16.4   | -0.029 | 0.93  | 0.87  |       |       |       |       |     |    |    |
| 7    | 0.1017 | 3.14   | 0.052 | 0.086 | 0.049 | 0.065 | 0.038 | 3793  | 278 | 24 | 24 |
| 11.7 | 15.6   | -0.028 | 0.87  | 0.85  |       |       |       |       |     |    |    |
| 8    | 0.1173 | 2.92   | 0.059 | 0.084 | 0.051 | 0.072 | 0.039 | 5759  | 204 | 18 | 21 |
| 11.3 | 15.9   | -0.023 | 0.82  | 0.78  |       |       |       |       |     |    |    |
| 9    | 0.1329 | 2.74   | 0.068 | 0.087 | 0.053 | 0.080 | 0.041 | 7764  | 172 | 18 | 19 |
| 9.6  | 16.0   | -0.036 | 0.84  | 0.81  |       |       |       |       |     |    |    |
| 10   | 0.1486 | 2.59   | 0.073 | 0.088 | 0.055 | 0.084 | 0.041 | 9993  | 151 | 17 | 19 |
| 9.0  | 15.7   | -0.027 | 0.80  | 0.77  |       |       |       |       |     |    |    |
| 11   | 0.1642 | 2.47   | 0.077 | 0.090 | 0.058 | 0.088 | 0.041 | 11932 | 145 | 18 | 19 |
| 8.3  | 15.8   | -0.031 | 0.80  | 0.78  |       |       |       |       |     |    |    |
| 12   | 0.1798 | 2.36   | 0.082 | 0.093 | 0.061 | 0.093 | 0.042 | 13222 | 140 | 18 | 19 |
| 7.8  | 15.5   | -0.030 | 0.82  | 0.81  |       |       |       |       |     |    |    |
| 13   | 0.1955 | 2.26   | 0.085 | 0.094 | 0.064 | 0.095 | 0.041 | 15100 | 133 | 18 | 19 |
| 7.4  | 15.5   | -0.023 | 0.80  | 0.79  |       |       |       |       |     |    |    |
| 14   | 0.2111 | 2.18   | 0.091 | 0.097 | 0.067 | 0.101 | 0.042 | 16460 | 125 | 18 | 18 |
| 6.8  | 15.4   | -0.027 | 0.83  | 0.82  |       |       |       |       |     |    |    |
| 15   | 0.2268 | 2.10   | 0.099 | 0.105 | 0.070 | 0.109 | 0.045 | 18075 | 106 | 18 | 16 |
| 6.1  | 14.4   | -0.026 | 0.85  | 0.83  |       |       |       |       |     |    |    |
| 16   | 0.2424 | 2.03   | 0.108 | 0.113 | 0.073 | 0.118 | 0.047 | 18809 | 91  | 15 | 15 |
| 5.9  | 13.5   | -0.018 | 0.86  | 0.85  |       |       |       |       |     |    |    |
| 17   | 0.2580 | 1.97   | 0.121 | 0.125 | 0.076 | 0.132 | 0.052 | 19856 | 78  | 15 | 14 |
| 5.4  | 12.6   | -0.019 | 0.91  | 0.90  |       |       |       |       |     |    |    |
| 18   | 0.2737 | 1.91   | 0.136 | 0.140 | 0.079 | 0.148 | 0.058 | 20437 | 65  | 13 | 13 |
| 4.9  | 11.5   | -0.023 | 0.95  | 0.94  |       |       |       |       |     |    |    |
| 19   | 0.2893 | 1.86   | 0.162 | 0.163 | 0.082 | 0.178 | 0.072 | 18659 | 51  | 13 | 11 |

|          |                  |         |                  |                    |       |       |       |        |     |        |    |  |
|----------|------------------|---------|------------------|--------------------|-------|-------|-------|--------|-----|--------|----|--|
| 4.0      | 9.3              | -0.027  | 0.95             | 0.93               |       |       |       |        |     |        |    |  |
| 20       | 0.3050           | 1.81    | 0.183            | 0.185              | 0.085 | 0.202 | 0.082 | 18799  | 43  | 12     | 11 |  |
| 3.7      | 8.4              | -0.019  | 0.99             | 0.96               |       |       |       |        |     |        |    |  |
| 21       | 0.3206           | 1.77    | 0.196            | 0.199              | 0.088 | 0.217 | 0.091 | 18430  | 38  | 11     | 10 |  |
| 3.6      | 7.7              | -0.018  | 0.96             | 0.94               |       |       |       |        |     |        |    |  |
| 22       | 0.3362           | 1.72    | 0.229            | 0.229              | 0.091 | 0.253 | 0.106 | 19010  | 32  | 10     | 10 |  |
| 3.2      | 6.9              | -0.017  | 0.94             | 0.92               |       |       |       |        |     |        |    |  |
| 23       | 0.3519           | 1.69    | 0.273            | 0.273              | 0.095 | 0.301 | 0.124 | 20580  | 26  | 10     | 10 |  |
| 2.7      | 6.1              | -0.033  | 0.95             | 0.94               |       |       |       |        |     |        |    |  |
| 24       | 0.3675           | 1.65    | 0.310            | 0.310              | 0.098 | 0.341 | 0.139 | 21426  | 24  | 10     | 10 |  |
| 2.4      | 5.6              | -0.020  | 0.96             | 0.93               |       |       |       |        |     |        |    |  |
| 25       | 0.3831           | 1.62    | 0.357            | 0.350              | 0.102 | 0.392 | 0.159 | 22399  | 20  | 10     | 10 |  |
| 2.1      | 4.9              | -0.044  | 0.92             | 0.91               |       |       |       |        |     |        |    |  |
| 26       | 0.3988           | 1.58    | 0.421            | 0.422              | 0.106 | 0.463 | 0.187 | 22809  | 17  | 9      | 10 |  |
| 1.8      | 4.3              | -0.007  | 0.95             | 0.94               |       |       |       |        |     |        |    |  |
| 27       | 0.4144           | 1.55    | 0.482            | 0.473              | 0.110 | 0.529 | 0.213 | 23657  | 15  | 9      | 10 |  |
| 1.6      | 3.8              | -0.058  | 0.91             | 0.90               |       |       |       |        |     |        |    |  |
| 28       | 0.4301           | 1.52    | 0.547            | 0.536              | 0.115 | 0.599 | 0.241 | 24248  | 13  | 9      | 10 |  |
| 1.4      | 3.4              | -0.021  | 0.90             | 0.89               |       |       |       |        |     |        |    |  |
| 29       | 0.4457           | 1.50    | 0.608            | 0.593              | 0.119 | 0.666 | 0.267 | 24777  | 12  | 9      | 10 |  |
| 1.3      | 3.1              | -0.082  | 0.87             | 0.86               |       |       |       |        |     |        |    |  |
| 30       | 0.4613           | 1.47    | 0.742            | 0.722              | 0.124 | 0.812 | 0.325 | 25334  | 10  | 9      | 10 |  |
| 1.1      | 2.5              | -0.073  | 0.85             | 0.84               |       |       |       |        |     |        |    |  |
| \$\$     |                  |         |                  |                    |       |       |       |        |     |        |    |  |
| Overall: |                  |         | 0.124            | 0.157              | 0.124 | 0.139 | 0.061 | 431952 | 79  | 18     | 14 |  |
| 4.4      | 9.7              | -0.025  | 1.79             | 0.89               |       |       |       |        |     |        |    |  |
| N        | 1/d <sup>2</sup> | Dmid    | Rmrg             | Rfull              | Rcum  | Rmeas | Rpim  | Nmeas  | AvI | RMSdev | sd |  |
| I/RMS    | Mn(I/sd)         | FrcBias | Chi <sup>2</sup> | Chi <sup>2</sup> c |       |       |       |        |     |        |    |  |

By 4sinTheta/Lambda<sup>2</sup> bins (statistics with and without anomalous)

=====

Statistics labelled '0v' are relative to the overall mean I+/-, ignoring anomalous  
 Other statistics are with either I+ or I- sets, for acentrics, ie with anomalous

\$TABLE: Analysis against resolution, with & without anomalous (0v), New:

\$GRAPHS:Rmerge, Rmeas, Rpim v Resolution:0|0.469156x0|0.812081:2,4,5,8,9,10,11:

| \$\$  |                  |       |       |        |       |        |       |         |       |        |
|-------|------------------|-------|-------|--------|-------|--------|-------|---------|-------|--------|
| N     | 1/d <sup>2</sup> | Dmid  | Rmrg  | Rmrg0v | Rcum  | Rcum0v | Rmeas | Rmeas0v | Rpim  | Rpim0v |
| Nmeas | \$\$             | \$\$  |       |        |       |        |       |         |       |        |
| 1     | 0.0078           | 11.31 | 0.101 | 0.094  | 0.101 | 0.094  | 0.141 | 0.127   | 0.098 | 0.085  |
| 563   |                  |       |       |        |       |        |       |         |       |        |
| 2     | 0.0235           | 6.53  | 0.054 | 0.060  | 0.071 | 0.073  | 0.074 | 0.077   | 0.049 | 0.048  |
| 1260  |                  |       |       |        |       |        |       |         |       |        |
| 3     | 0.0391           | 5.06  | 0.046 | 0.049  | 0.057 | 0.060  | 0.063 | 0.063   | 0.042 | 0.039  |
| 1716  |                  |       |       |        |       |        |       |         |       |        |
| 4     | 0.0547           | 4.27  | 0.042 | 0.044  | 0.051 | 0.053  | 0.056 | 0.056   | 0.037 | 0.034  |
| 1908  |                  |       |       |        |       |        |       |         |       |        |
| 5     | 0.0704           | 3.77  | 0.039 | 0.041  | 0.047 | 0.050  | 0.053 | 0.053   | 0.035 | 0.032  |
| 2341  |                  |       |       |        |       |        |       |         |       |        |
| 6     | 0.0860           | 3.41  | 0.045 | 0.045  | 0.047 | 0.049  | 0.060 | 0.057   | 0.039 | 0.034  |
| 2836  |                  |       |       |        |       |        |       |         |       |        |
| 7     | 0.1017           | 3.14  | 0.053 | 0.052  | 0.048 | 0.049  | 0.071 | 0.065   | 0.046 | 0.038  |
| 3793  |                  |       |       |        |       |        |       |         |       |        |
| 8     | 0.1173           | 2.92  | 0.059 | 0.059  | 0.049 | 0.051  | 0.077 | 0.072   | 0.049 | 0.039  |
| 5759  |                  |       |       |        |       |        |       |         |       |        |
| 9     | 0.1329           | 2.74  | 0.065 | 0.068  | 0.052 | 0.053  | 0.083 | 0.080   | 0.051 | 0.041  |
| 7764  |                  |       |       |        |       |        |       |         |       |        |
| 10    | 0.1486           | 2.59  | 0.069 | 0.073  | 0.055 | 0.055  | 0.087 | 0.084   | 0.052 | 0.041  |
| 9993  |                  |       |       |        |       |        |       |         |       |        |
| 11    | 0.1642           | 2.47  | 0.073 | 0.077  | 0.058 | 0.058  | 0.091 | 0.088   | 0.053 | 0.041  |
| 11932 |                  |       |       |        |       |        |       |         |       |        |
| 12    | 0.1798           | 2.36  | 0.077 | 0.082  | 0.061 | 0.061  | 0.096 | 0.093   | 0.055 | 0.042  |

13222

|    |        |      |       |       |       |       |       |       |       |       |
|----|--------|------|-------|-------|-------|-------|-------|-------|-------|-------|
| 13 | 0.1955 | 2.26 | 0.080 | 0.085 | 0.063 | 0.064 | 0.098 | 0.095 | 0.056 | 0.041 |
|----|--------|------|-------|-------|-------|-------|-------|-------|-------|-------|

15100

|    |        |      |       |       |       |       |       |       |       |       |
|----|--------|------|-------|-------|-------|-------|-------|-------|-------|-------|
| 14 | 0.2111 | 2.18 | 0.086 | 0.091 | 0.066 | 0.067 | 0.104 | 0.101 | 0.058 | 0.042 |
|----|--------|------|-------|-------|-------|-------|-------|-------|-------|-------|

16460

|    |        |      |       |       |       |       |       |       |       |       |
|----|--------|------|-------|-------|-------|-------|-------|-------|-------|-------|
| 15 | 0.2268 | 2.10 | 0.092 | 0.099 | 0.069 | 0.070 | 0.112 | 0.109 | 0.061 | 0.045 |
|----|--------|------|-------|-------|-------|-------|-------|-------|-------|-------|

18075

|    |        |      |       |       |       |       |       |       |       |       |
|----|--------|------|-------|-------|-------|-------|-------|-------|-------|-------|
| 16 | 0.2424 | 2.03 | 0.100 | 0.108 | 0.072 | 0.073 | 0.120 | 0.118 | 0.065 | 0.047 |
|----|--------|------|-------|-------|-------|-------|-------|-------|-------|-------|

18809

|    |        |      |       |       |       |       |       |       |       |       |
|----|--------|------|-------|-------|-------|-------|-------|-------|-------|-------|
| 17 | 0.2580 | 1.97 | 0.112 | 0.121 | 0.075 | 0.076 | 0.134 | 0.132 | 0.072 | 0.052 |
|----|--------|------|-------|-------|-------|-------|-------|-------|-------|-------|

19856

|    |        |      |       |       |       |       |       |       |       |       |
|----|--------|------|-------|-------|-------|-------|-------|-------|-------|-------|
| 18 | 0.2737 | 1.91 | 0.125 | 0.136 | 0.079 | 0.079 | 0.150 | 0.148 | 0.081 | 0.058 |
|----|--------|------|-------|-------|-------|-------|-------|-------|-------|-------|

20437

|    |        |      |       |       |       |       |       |       |       |       |
|----|--------|------|-------|-------|-------|-------|-------|-------|-------|-------|
| 19 | 0.2893 | 1.86 | 0.152 | 0.162 | 0.082 | 0.082 | 0.182 | 0.178 | 0.098 | 0.072 |
|----|--------|------|-------|-------|-------|-------|-------|-------|-------|-------|

18659

|    |        |      |       |       |       |       |       |       |       |       |
|----|--------|------|-------|-------|-------|-------|-------|-------|-------|-------|
| 20 | 0.3050 | 1.81 | 0.169 | 0.183 | 0.085 | 0.085 | 0.204 | 0.202 | 0.112 | 0.082 |
|----|--------|------|-------|-------|-------|-------|-------|-------|-------|-------|

18799

|    |        |      |       |       |       |       |       |       |       |       |
|----|--------|------|-------|-------|-------|-------|-------|-------|-------|-------|
| 21 | 0.3206 | 1.77 | 0.182 | 0.196 | 0.087 | 0.088 | 0.220 | 0.217 | 0.121 | 0.091 |
|----|--------|------|-------|-------|-------|-------|-------|-------|-------|-------|

18430

|    |        |      |       |       |       |       |       |       |       |       |
|----|--------|------|-------|-------|-------|-------|-------|-------|-------|-------|
| 22 | 0.3362 | 1.72 | 0.211 | 0.229 | 0.090 | 0.091 | 0.256 | 0.253 | 0.142 | 0.106 |
|----|--------|------|-------|-------|-------|-------|-------|-------|-------|-------|

19010

|    |        |      |       |       |       |       |       |       |       |       |
|----|--------|------|-------|-------|-------|-------|-------|-------|-------|-------|
| 23 | 0.3519 | 1.69 | 0.249 | 0.273 | 0.094 | 0.095 | 0.303 | 0.301 | 0.169 | 0.124 |
|----|--------|------|-------|-------|-------|-------|-------|-------|-------|-------|

20580

|    |        |      |       |       |       |       |       |       |       |       |
|----|--------|------|-------|-------|-------|-------|-------|-------|-------|-------|
| 24 | 0.3675 | 1.65 | 0.281 | 0.310 | 0.097 | 0.098 | 0.341 | 0.341 | 0.190 | 0.139 |
|----|--------|------|-------|-------|-------|-------|-------|-------|-------|-------|

21426

|    |        |      |       |       |       |       |       |       |       |       |
|----|--------|------|-------|-------|-------|-------|-------|-------|-------|-------|
| 25 | 0.3831 | 1.62 | 0.324 | 0.357 | 0.101 | 0.102 | 0.394 | 0.392 | 0.218 | 0.159 |
|----|--------|------|-------|-------|-------|-------|-------|-------|-------|-------|

22399

|    |        |      |       |       |       |       |       |       |       |       |
|----|--------|------|-------|-------|-------|-------|-------|-------|-------|-------|
| 26 | 0.3988 | 1.58 | 0.376 | 0.421 | 0.105 | 0.106 | 0.456 | 0.463 | 0.252 | 0.187 |
|----|--------|------|-------|-------|-------|-------|-------|-------|-------|-------|

22809

|    |        |      |       |       |       |       |       |       |       |       |
|----|--------|------|-------|-------|-------|-------|-------|-------|-------|-------|
| 27 | 0.4144 | 1.55 | 0.434 | 0.482 | 0.109 | 0.110 | 0.526 | 0.529 | 0.291 | 0.213 |
|----|--------|------|-------|-------|-------|-------|-------|-------|-------|-------|

23657

|    |        |      |       |       |       |       |       |       |       |       |
|----|--------|------|-------|-------|-------|-------|-------|-------|-------|-------|
| 28 | 0.4301 | 1.52 | 0.488 | 0.547 | 0.114 | 0.115 | 0.592 | 0.599 | 0.328 | 0.241 |
|----|--------|------|-------|-------|-------|-------|-------|-------|-------|-------|

24248



|          |       |       |       |       |        |      |      |     |     |      |      |
|----------|-------|-------|-------|-------|--------|------|------|-----|-----|------|------|
|          | 293   | 0.068 | 0.161 | 0.079 | 0.038  | 7971 | 291  | 28  | 34  | 10.3 | 17.8 |
| -0.034   |       |       |       |       |        |      |      |     |     |      |      |
|          | 388   | 0.063 | 0.152 | 0.075 | 0.039  | 5536 | 385  | 34  | 41  | 11.2 | 17.6 |
| -0.030   |       |       |       |       |        |      |      |     |     |      |      |
|          | 536   | 0.053 | 0.145 | 0.065 | 0.037  | 3359 | 531  | 39  | 50  | 13.5 | 17.3 |
| -0.031   |       |       |       |       |        |      |      |     |     |      |      |
|          | 1389  | 0.047 | 0.124 | 0.060 | 0.038  | 4899 | 1358 | 111 | 99  | 12.2 | 18.2 |
| -0.035   |       |       |       |       |        |      |      |     |     |      |      |
| \$\$     |       |       |       |       |        |      |      |     |     |      |      |
| Overall: | 0.124 | 0.124 | 0.139 | 0.061 | 431952 | 79   | 18   | 14  | 4.4 | 9.7  |      |
| -0.025   |       |       |       |       |        |      |      |     |     |      |      |

|         |      |      |      |       |      |       |     |        |    |       |          |
|---------|------|------|------|-------|------|-------|-----|--------|----|-------|----------|
|         | Imax | Rmrg | Rcum | Rmeas | Rpim | Nmeas | AvI | RMSdev | sd | I/RMS | Mn(I/sd) |
| FrcBias |      |      |      |       |      |       |     |        |    |       |          |

Rmeas by resolution for each run

-----

\$TABLE: Analysis against resolution for each run in dataset, New:

\$GRAPHS:Rmeas v. resolution for each run:0|0.469156x0|0.887629:2,4,5:

\$\$

|    |        |       |       |       |      |      |
|----|--------|-------|-------|-------|------|------|
| N  | 1/d^2  | Dmid  | Run1  | Run2  | \$\$ | \$\$ |
| 1  | 0.0078 | 11.31 | 0.125 | 0.129 |      |      |
| 2  | 0.0235 | 6.53  | 0.087 | 0.070 |      |      |
| 3  | 0.0391 | 5.06  | 0.065 | 0.062 |      |      |
| 4  | 0.0547 | 4.27  | 0.052 | 0.059 |      |      |
| 5  | 0.0704 | 3.77  | 0.055 | 0.051 |      |      |
| 6  | 0.0860 | 3.41  | 0.058 | 0.056 |      |      |
| 7  | 0.1017 | 3.14  | 0.066 | 0.065 |      |      |
| 8  | 0.1173 | 2.92  | 0.075 | 0.069 |      |      |
| 9  | 0.1329 | 2.74  | 0.081 | 0.079 |      |      |
| 10 | 0.1486 | 2.59  | 0.085 | 0.084 |      |      |

|    |        |      |       |       |
|----|--------|------|-------|-------|
| 11 | 0.1642 | 2.47 | 0.087 | 0.090 |
| 12 | 0.1798 | 2.36 | 0.092 | 0.094 |
| 13 | 0.1955 | 2.26 | 0.090 | 0.101 |
| 14 | 0.2111 | 2.18 | 0.094 | 0.109 |
| 15 | 0.2268 | 2.10 | 0.101 | 0.120 |
| 16 | 0.2424 | 2.03 | 0.109 | 0.130 |
| 17 | 0.2580 | 1.97 | 0.122 | 0.145 |
| 18 | 0.2737 | 1.91 | 0.139 | 0.161 |
| 19 | 0.2893 | 1.86 | 0.163 | 0.198 |
| 20 | 0.3050 | 1.81 | 0.186 | 0.223 |
| 21 | 0.3206 | 1.77 | 0.206 | 0.233 |
| 22 | 0.3362 | 1.72 | 0.237 | 0.276 |
| 23 | 0.3519 | 1.69 | 0.282 | 0.329 |
| 24 | 0.3675 | 1.65 | 0.319 | 0.372 |
| 25 | 0.3831 | 1.62 | 0.362 | 0.438 |
| 26 | 0.3988 | 1.58 | 0.430 | 0.511 |
| 27 | 0.4144 | 1.55 | 0.497 | 0.574 |
| 28 | 0.4301 | 1.52 | 0.557 | 0.662 |
| 29 | 0.4457 | 1.50 | 0.620 | 0.734 |
| 30 | 0.4613 | 1.47 | 0.761 | 0.888 |

\$\$

Overall: 0.139 0.140

| N | 1/d <sup>2</sup> | Dmid | Run1 | Run2 |
|---|------------------|------|------|------|
|---|------------------|------|------|------|

Completeness and multiplicity, including reflections measured only once

=====

%poss is completeness in the shell, C%poss in cumulative to that resolution

The anomalous completeness values (AnomCmpl) are the percentage of possible anomalous differences measured

AnomFrc is the % of measured acentric reflections for which an anomalous difference

has been measured

Anomalous multiplicity  $AnoMlt$  is calculated for reflections with both  $I+$  and  $I-$  measured, and is defined as:

$Sum\{[Min(n+, n-) + Dn/(Dn+1)]\}/NanomMeasured$ , where  $n+$ ,  $n-$  are the number of measurements of  $I+$ ,  $I-$ ,  $Dn = |n+ - n-|$

\$TABLE: Completeness & multiplicity v. resolution, New:

\$GRAPHS:Completeness v Resolution :N:2, 7, 8, 10, 11:

:Multiplicity v Resolution:0|0.469156x0|6.42942:2, 9, 12:

| \$\$   |                  |       |       |      |       |       |        |        |        |        |
|--------|------------------|-------|-------|------|-------|-------|--------|--------|--------|--------|
| N      | 1/d <sup>2</sup> | Dmid  | Nmeas | Nref | Ncent | %poss | C%poss | Mlplct | AnoCmp | AnoFrc |
| AnoMlt | \$\$             | \$\$  |       |      |       |       |        |        |        |        |
| 1      | 0.0078           | 11.31 | 724   | 369  | 79    | 66.6  | 66.6   | 2.0    | 31.2   | 44.1   |
| 1.4    |                  |       |       |      |       |       |        |        |        |        |
| 2      | 0.0235           | 6.53  | 1556  | 717  | 89    | 75.1  | 72.1   | 2.2    | 33.4   | 42.8   |
| 1.6    |                  |       |       |      |       |       |        |        |        |        |
| 3      | 0.0391           | 5.06  | 2073  | 924  | 101   | 73.6  | 72.8   | 2.2    | 35.7   | 47.6   |
| 1.6    |                  |       |       |      |       |       |        |        |        |        |
| 4      | 0.0547           | 4.27  | 2346  | 1054 | 90    | 73.1  | 72.9   | 2.2    | 34.3   | 46.1   |
| 1.6    |                  |       |       |      |       |       |        |        |        |        |
| 5      | 0.0704           | 3.77  | 2822  | 1213 | 97    | 75.3  | 73.5   | 2.3    | 36.1   | 47.2   |
| 1.7    |                  |       |       |      |       |       |        |        |        |        |
| 6      | 0.0860           | 3.41  | 3393  | 1382 | 101   | 76.0  | 74.1   | 2.5    | 35.8   | 46.5   |
| 1.9    |                  |       |       |      |       |       |        |        |        |        |
| 7      | 0.1017           | 3.14  | 4298  | 1582 | 113   | 80.6  | 75.5   | 2.7    | 47.8   | 58.7   |
| 1.9    |                  |       |       |      |       |       |        |        |        |        |
| 8      | 0.1173           | 2.92  | 6159  | 1850 | 138   | 88.3  | 77.8   | 3.3    | 60.5   | 68.0   |
| 2.1    |                  |       |       |      |       |       |        |        |        |        |
| 9      | 0.1329           | 2.74  | 8074  | 2049 | 140   | 91.7  | 80.0   | 3.9    | 70.3   | 76.2   |
| 2.3    |                  |       |       |      |       |       |        |        |        |        |
| 10     | 0.1486           | 2.59  | 10231 | 2264 | 150   | 96.2  | 82.4   | 4.5    | 80.4   | 83.0   |

|    |        |      |       |      |     |      |      |     |      |      |
|----|--------|------|-------|------|-----|------|------|-----|------|------|
| 11 | 0.1642 | 2.47 | 12089 | 2440 | 156 | 97.9 | 84.5 | 5.0 | 86.1 | 87.7 |
|----|--------|------|-------|------|-----|------|------|-----|------|------|

2.7

|    |        |      |       |      |     |      |      |     |      |      |
|----|--------|------|-------|------|-----|------|------|-----|------|------|
| 12 | 0.1798 | 2.36 | 13359 | 2552 | 160 | 98.4 | 86.2 | 5.2 | 90.4 | 91.5 |
|----|--------|------|-------|------|-----|------|------|-----|------|------|

2.7

|    |        |      |       |      |     |      |      |     |      |      |
|----|--------|------|-------|------|-----|------|------|-----|------|------|
| 13 | 0.1955 | 2.26 | 15194 | 2696 | 177 | 99.2 | 87.7 | 5.6 | 94.1 | 94.7 |
|----|--------|------|-------|------|-----|------|------|-----|------|------|

2.9

|    |        |      |       |      |     |      |      |     |      |      |
|----|--------|------|-------|------|-----|------|------|-----|------|------|
| 14 | 0.2111 | 2.18 | 16505 | 2759 | 170 | 99.6 | 88.9 | 6.0 | 97.3 | 97.6 |
|----|--------|------|-------|------|-----|------|------|-----|------|------|

3.0

|    |        |      |       |      |     |      |      |     |      |      |
|----|--------|------|-------|------|-----|------|------|-----|------|------|
| 15 | 0.2268 | 2.10 | 18107 | 2932 | 172 | 99.8 | 90.0 | 6.2 | 98.6 | 98.8 |
|----|--------|------|-------|------|-----|------|------|-----|------|------|

### 3.1

|    |        |      |       |      |     |      |      |     |      |      |
|----|--------|------|-------|------|-----|------|------|-----|------|------|
| 16 | 0.2424 | 2.03 | 18836 | 2982 | 174 | 99.9 | 90.9 | 6.3 | 99.4 | 99.4 |
|----|--------|------|-------|------|-----|------|------|-----|------|------|

3. 2

|    |        |      |       |      |     |       |      |     |      |      |
|----|--------|------|-------|------|-----|-------|------|-----|------|------|
| 17 | 0.2580 | 1.97 | 19874 | 3101 | 179 | 100.0 | 91.7 | 6.4 | 99.6 | 99.6 |
|----|--------|------|-------|------|-----|-------|------|-----|------|------|

3.2

|    |        |      |       |      |     |      |      |     |      |      |
|----|--------|------|-------|------|-----|------|------|-----|------|------|
| 18 | 0.2737 | 1.91 | 20452 | 3181 | 169 | 99.9 | 92.4 | 6.4 | 99.8 | 99.8 |
|----|--------|------|-------|------|-----|------|------|-----|------|------|

3. 2

|    |        |      |       |      |     |      |      |     |      |      |
|----|--------|------|-------|------|-----|------|------|-----|------|------|
| 19 | 0.2893 | 1.86 | 18748 | 3264 | 179 | 99.6 | 92.9 | 5.7 | 98.2 | 98.4 |
|----|--------|------|-------|------|-----|------|------|-----|------|------|

2.8

|    |        |      |       |      |     |      |      |     |      |      |
|----|--------|------|-------|------|-----|------|------|-----|------|------|
| 20 | 0.3050 | 1.81 | 18863 | 3322 | 164 | 99.3 | 93.4 | 5.7 | 97.9 | 98.4 |
|----|--------|------|-------|------|-----|------|------|-----|------|------|

2.8

|    |        |      |       |      |     |       |      |     |      |      |
|----|--------|------|-------|------|-----|-------|------|-----|------|------|
| 21 | 0.3206 | 1.77 | 18496 | 3417 | 175 | 100.0 | 93.9 | 5.4 | 97.4 | 97.4 |
|----|--------|------|-------|------|-----|-------|------|-----|------|------|

2.7

|    |        |      |       |      |     |      |      |     |      |      |
|----|--------|------|-------|------|-----|------|------|-----|------|------|
| 22 | 0.3362 | 1.72 | 19076 | 3537 | 172 | 99.7 | 94.3 | 5.4 | 97.9 | 98.0 |
|----|--------|------|-------|------|-----|------|------|-----|------|------|

2.7

|    |        |      |       |      |     |      |      |     |      |      |
|----|--------|------|-------|------|-----|------|------|-----|------|------|
| 23 | 0.3519 | 1.69 | 20610 | 3594 | 173 | 99.8 | 94.6 | 5.7 | 98.5 | 98.6 |
|----|--------|------|-------|------|-----|------|------|-----|------|------|

2.8

|    |        |      |       |      |     |       |      |     |      |      |
|----|--------|------|-------|------|-----|-------|------|-----|------|------|
| 24 | 0.3675 | 1.65 | 21437 | 3668 | 180 | 100.0 | 94.9 | 5.8 | 99.6 | 99.6 |
|----|--------|------|-------|------|-----|-------|------|-----|------|------|

2.9

|    |        |      |       |      |     |       |      |     |      |      |
|----|--------|------|-------|------|-----|-------|------|-----|------|------|
| 25 | 0.3831 | 1.62 | 22413 | 3775 | 179 | 100.0 | 95.2 | 5.9 | 99.6 | 99.6 |
|----|--------|------|-------|------|-----|-------|------|-----|------|------|

2.9

|    |        |      |       |      |     |      |      |     |      |      |
|----|--------|------|-------|------|-----|------|------|-----|------|------|
| 26 | 0.3988 | 1.58 | 22819 | 3791 | 180 | 99.9 | 95.5 | 6.0 | 99.4 | 99.4 |
|----|--------|------|-------|------|-----|------|------|-----|------|------|

3.0

|          |        |      |        |       |       |       |        |        |        |        |
|----------|--------|------|--------|-------|-------|-------|--------|--------|--------|--------|
| 27       | 0.4144 | 1.55 | 23668  | 3914  | 182   | 100.0 | 95.8   | 6.0    | 99.5   | 99.5   |
| 3.0      |        |      |        |       |       |       |        |        |        |        |
| 28       | 0.4301 | 1.52 | 24256  | 3976  | 180   | 100.0 | 96.0   | 6.1    | 99.9   | 99.9   |
| 3.0      |        |      |        |       |       |       |        |        |        |        |
| 29       | 0.4457 | 1.50 | 24784  | 4036  | 174   | 100.0 | 96.2   | 6.1    | 99.9   | 99.9   |
| 3.0      |        |      |        |       |       |       |        |        |        |        |
| 30       | 0.4613 | 1.47 | 25344  | 4113  | 172   | 99.8  | 96.4   | 6.2    | 99.8   | 99.9   |
| 3.0      |        |      |        |       |       |       |        |        |        |        |
| Overall: |        |      | 436606 | 80454 | 4565  | 96.4  | 96.4   | 5.4    | 89.3   | 92.3   |
| 2.8      |        |      |        |       |       |       |        |        |        |        |
|          |        |      | Nmeas  | Nref  | Ncent | %poss | C%poss | Mlplct | AnoCmp | AnoFrc |
| AnoMlt   |        |      |        |       |       |       |        |        |        |        |

## Analysis of standard deviations

=====

This analyses the distribution of the normalised deviations

$$\Delta = (Ihl - Mn(Iothers)) / \sqrt{sd(Ihl)**2 + sd(Mn(I))**2}$$

If the SD is a true estimate of the error, this distribution should have

Mean=0.0 and Sigma=1.0 for all ranges of intensity

The analysis is repeated for ranges of increasing Imean

The Mean is expected to increase with Imean since the latter is a weighted mean and sd(Ihl) & Ihl are correlated

If the Sigma increases with Imean, increase the value of SdAdd

ISa is the predicted asymptotic value of I/sd(I) for large I, see

K.Diederichs, Acta Cryst. D66, 733

SD corrections:-  $SdFac * \sqrt{sd(I)**2 + SdB \cdot I + (SdAdd \cdot I)**2}$

Fulls

Partials

|         |                  |       |      |        |     |       |       |        |      |
|---------|------------------|-------|------|--------|-----|-------|-------|--------|------|
| Run     |                  | SdFac | SdB  | SdAdd  | ISa | SdFac | SdB   | SdAdd  | ISa  |
| AllRuns | Fulls & partials | 0.80  | 0.20 | 0.1679 | 7.4 | 0.80  | -0.25 | 0.0858 | 14.5 |

\$TABLE: Run 1, standard deviation v. Intensity, New:

\$GRAPHS: Sigma(scatter/SD), Mn(Chi^2), within 5 sd:N:2,13,14,17,18:

: Sigma(scatter/SD), Mn(Chi^2), within 5 sd, all and within 5  
sd:N:2,5,6,9,10,13,14,17,18:

|        |         | Fulls, all      |       |      |         | Partial, all |        |      |        | Fulls, |       |
|--------|---------|-----------------|-------|------|---------|--------------|--------|------|--------|--------|-------|
| < 5 sd |         | Partial, < 5 sd |       |      |         |              |        |      |        |        |       |
| \$\$   |         |                 |       |      |         |              |        |      |        |        |       |
| Range  | Mn(I)   | NF              | MnF   | SdF  | ChiSqF  | NP           | MnP    | SdP  | ChiSqP | NFc    | MnFc  |
| SdFc   | ChiSqFc | NPc             | MnPc  | SdPc | ChiSqPc | \$\$\$       | \$\$\$ |      |        |        |       |
| 1      | 11      | 107322          | 0.04  | 0.90 | 0.82    | 19616        | 0.08   | 0.90 | 0.82   | 107296 | 0.04  |
| 0.90   | 0.81    | 19581           | 0.08  | 0.90 | 0.81    |              |        |      |        |        |       |
| 2      | 44      | 36790           | 0.08  | 0.98 | 0.97    | 6320         | 0.11   | 1.07 | 1.17   | 36764  | 0.07  |
| 0.97   | 0.95    | 6308            | 0.11  | 1.07 | 1.15    |              |        |      |        |        |       |
| 3      | 79      | 19492           | 0.07  | 0.91 | 0.84    | 3438         | 0.14   | 1.09 | 1.20   | 19486  | 0.06  |
| 0.91   | 0.83    | 3430            | 0.13  | 1.07 | 1.17    |              |        |      |        |        |       |
| 4      | 119     | 12898           | 0.05  | 0.84 | 0.71    | 2436         | 0.16   | 1.04 | 1.11   | 12894  | 0.05  |
| 0.84   | 0.70    | 2433            | 0.15  | 1.03 | 1.08    |              |        |      |        |        |       |
| 5      | 166     | 8187            | 0.01  | 0.81 | 0.65    | 1785         | 0.12   | 1.03 | 1.08   | 8185   | 0.01  |
| 0.80   | 0.65    | 1782            | 0.11  | 1.02 | 1.05    |              |        |      |        |        |       |
| 6      | 223     | 5399            | -0.00 | 0.76 | 0.58    | 1448         | 0.09   | 0.97 | 0.94   | 5398   | -0.01 |
| 0.76   | 0.57    | 1447            | 0.09  | 0.95 | 0.92    |              |        |      |        |        |       |
| 7      | 293     | 3232            | -0.04 | 0.77 | 0.59    | 1201         | 0.09   | 0.94 | 0.89   | 3230   | -0.04 |
| 0.76   | 0.59    | 1198            | 0.09  | 0.93 | 0.87    |              |        |      |        |        |       |
| 8      | 388     | 1836            | -0.06 | 0.77 | 0.60    | 1094         | 0.06   | 0.99 | 0.99   | 1835   | -0.05 |
| 0.76   | 0.58    | 1089            | 0.05  | 0.95 | 0.91    |              |        |      |        |        |       |
| 9      | 536     | 808             | -0.08 | 0.77 | 0.59    | 965          | 0.04   | 0.94 | 0.88   | 808    | -0.08 |
| 0.77   | 0.59    | 963             | 0.03  | 0.92 | 0.85    |              |        |      |        |        |       |
| 10     | 1389    | 270             | -0.28 | 0.88 | 0.85    | 1913         | -0.06  | 1.12 | 1.26   | 269    | -0.27 |

0.86 0.82 1903 -0.06 0.98 0.97

\$\$

Overall: 196234 0.04 0.91 0.82 40216 0.09 0.98 0.97 196165 0.04

0.90 0.81 40134 0.08 0.96 0.94

\$TABLE: Run 2, standard deviation v. Intensity, New:

\$GRAPHS: Sigma(scatter/SD), Mn(Chi^2), within 5 sd:N:2,13,14,17,18:

: Sigma(scatter/SD), Mn(Chi^2), within 5 sd, all and within 5  
sd:N:2,5,6,9,10,13,14,17,18:

|              |      | Fulls, all      |       |      |         | Partial, all |      |      |        | Fulls, |       |
|--------------|------|-----------------|-------|------|---------|--------------|------|------|--------|--------|-------|
| < 5 sd       |      | Partial, < 5 sd |       |      |         |              |      |      |        |        |       |
| Range        |      | Mn(I)           |       |      |         |              |      |      |        |        |       |
| SdFc ChiSqFc |      | NF              | MnF   | SdF  | ChiSqF  | NP           | MnP  | SdP  | ChiSqP | NFc    | MnFc  |
|              |      | NPc             | MnPc  | SdPc | ChiSqPc | \$\$\$       |      |      |        |        |       |
| 1            | 11   | 85500           | 0.02  | 0.93 | 0.86    | 23699        | 0.08 | 0.92 | 0.85   | 85495  | 0.02  |
| 0.93         | 0.86 | 23659           | 0.08  | 0.91 | 0.84    |              |      |      |        |        |       |
| 2            | 44   | 25531           | -0.02 | 1.11 | 1.24    | 7664         | 0.13 | 1.11 | 1.26   | 25508  | -0.02 |
| 1.10         | 1.21 | 7623            | 0.13  | 1.08 | 1.19    |              |      |      |        |        |       |
| 3            | 79   | 13532           | -0.06 | 1.12 | 1.25    | 4231         | 0.11 | 1.15 | 1.35   | 13512  | -0.06 |
| 1.10         | 1.21 | 4211            | 0.12  | 1.12 | 1.27    |              |      |      |        |        |       |
| 4            | 119  | 8824            | -0.09 | 1.07 | 1.15    | 2941         | 0.09 | 1.12 | 1.26   | 8810   | -0.09 |
| 1.05         | 1.11 | 2924            | 0.10  | 1.07 | 1.15    |              |      |      |        |        |       |
| 5            | 166  | 5620            | -0.11 | 1.04 | 1.10    | 2191         | 0.15 | 1.12 | 1.27   | 5611   | -0.11 |
| 1.02         | 1.06 | 2179            | 0.16  | 1.07 | 1.17    |              |      |      |        |        |       |
| 6            | 223  | 3606            | -0.13 | 1.01 | 1.04    | 1713         | 0.14 | 1.00 | 1.02   | 3603   | -0.13 |
| 1.00         | 1.02 | 1705            | 0.16  | 0.96 | 0.96    |              |      |      |        |        |       |
| 7            | 293  | 2040            | -0.22 | 1.04 | 1.12    | 1498         | 0.17 | 1.06 | 1.15   | 2035   | -0.22 |
| 1.02         | 1.08 | 1488            | 0.17  | 1.01 | 1.05    |              |      |      |        |        |       |
| 8            | 388  | 1189            | -0.25 | 1.09 | 1.25    | 1417         | 0.12 | 0.99 | 1.00   | 1186   | -0.24 |
| 1.06         | 1.19 | 1404            | 0.12  | 0.94 | 0.91    |              |      |      |        |        |       |

|          |      |        |       |      |      |       |      |      |      |        |       |
|----------|------|--------|-------|------|------|-------|------|------|------|--------|-------|
| 9        | 536  | 477    | -0.28 | 1.03 | 1.14 | 1109  | 0.07 | 1.00 | 1.01 | 476    | -0.28 |
| 1.02     | 1.12 | 1105   | 0.08  | 0.96 | 0.92 |       |      |      |      |        |       |
| 10       | 1389 | 202    | -0.35 | 1.19 | 1.54 | 2502  | 0.08 | 1.11 | 1.24 | 197    | -0.31 |
| 1.08     | 1.26 | 2486   | 0.08  | 0.98 | 0.96 |       |      |      |      |        |       |
| \$\$     |      |        |       |      |      |       |      |      |      |        |       |
| Overall: |      | 146521 | -0.01 | 1.00 | 1.00 | 48965 | 0.10 | 1.02 | 1.04 | 146433 | -0.01 |
| 0.99     | 0.99 | 48784  | 0.10  | 0.99 | 0.98 |       |      |      |      |        |       |

\$TABLE: All runs, standard deviation v. Intensity, New:

\$GRAPHS: Sigma(scatter/SD), Mn(Chi^2), within 5 sd:N:2,13,14,17,18:

: Sigma(scatter/SD), Mn(Chi^2), within 5 sd, all and within 5  
sd:N:2,5,6,9,10,13,14,17,18:

|        |         | Fulls, all      |       |      |         | Partial, all |      |      |        | Fulls, |       |
|--------|---------|-----------------|-------|------|---------|--------------|------|------|--------|--------|-------|
| < 5 sd |         | Partial, < 5 sd |       |      |         |              |      |      |        |        |       |
| \$\$   |         |                 |       |      |         |              |      |      |        |        |       |
| Range  | Mn(I)   | NF              | MnF   | SdF  | ChiSqF  | NP           | MnP  | SdP  | ChiSqP | NFc    | MnFc  |
| SdFc   | ChiSqFc | NPc             | MnPc  | SdPc | ChiSqPc | \$\$         | \$\$ |      |        |        |       |
| 1      | 11      | 192822          | 0.03  | 0.91 | 0.83    | 43315        | 0.08 | 0.91 | 0.84   | 192791 | 0.03  |
| 0.91   | 0.00    | 43240           | 0.08  | 0.90 | 0.83    |              |      |      |        |        |       |
| 2      | 44      | 62321           | 0.04  | 1.04 | 1.07    | 13984        | 0.12 | 1.10 | 1.08   | 62272  | 0.04  |
| 1.03   | 0.00    | 13931           | 0.12  | 1.08 | 1.06    |              |      |      |        |        |       |
| 3      | 79      | 33024           | 0.02  | 1.00 | 1.00    | 7669         | 0.12 | 1.13 | 1.01   | 32998  | 0.01  |
| 0.99   | 0.00    | 7641            | 0.12  | 1.10 | 0.99    |              |      |      |        |        |       |
| 4      | 119     | 21722           | -0.01 | 0.94 | 0.88    | 5377         | 0.12 | 1.09 | 0.89   | 21704  | -0.01 |
| 0.93   | 0.00    | 5357            | 0.12  | 1.05 | 0.87    |              |      |      |        |        |       |
| 5      | 166     | 13807           | -0.04 | 0.91 | 0.83    | 3976         | 0.14 | 1.08 | 0.84   | 13796  | -0.04 |
| 0.90   | 0.00    | 3961            | 0.14  | 1.05 | 0.82    |              |      |      |        |        |       |
| 6      | 223     | 9005            | -0.06 | 0.87 | 0.76    | 3161         | 0.12 | 0.99 | 0.76   | 9001   | -0.06 |
| 0.86   | 0.00    | 3152            | 0.12  | 0.96 | 0.75    |              |      |      |        |        |       |
| 7      | 293     | 5272            | -0.11 | 0.89 | 0.79    | 2699         | 0.13 | 1.01 | 0.80   | 5265   | -0.11 |

| N | 1/d^2  | Dmid  | sd(k)/k | relSD | Number | \$\$ | \$\$ |
|---|--------|-------|---------|-------|--------|------|------|
| 1 | 0.0084 | 10.91 | 0.0060  | 0.155 | 3340   |      |      |

|          |        |      |        |       |        |
|----------|--------|------|--------|-------|--------|
| 2        | 0.0240 | 6.45 | 0.0060 | 0.081 | 6387   |
| 3        | 0.0396 | 5.02 | 0.0060 | 0.088 | 8230   |
| 4        | 0.0553 | 4.25 | 0.0061 | 0.087 | 9734   |
| 5        | 0.0709 | 3.76 | 0.0061 | 0.070 | 10554  |
| 6        | 0.0865 | 3.40 | 0.0062 | 0.047 | 10593  |
| 7        | 0.1021 | 3.13 | 0.0062 | 0.031 | 10760  |
| 8        | 0.1177 | 2.91 | 0.0063 | 0.021 | 12325  |
| 9        | 0.1334 | 2.74 | 0.0064 | 0.016 | 13755  |
| 10       | 0.1490 | 2.59 | 0.0065 | 0.012 | 14859  |
| 11       | 0.1646 | 2.46 | 0.0066 | 0.010 | 15916  |
| 12       | 0.1802 | 2.36 | 0.0067 | 0.009 | 16659  |
| 13       | 0.1958 | 2.26 | 0.0068 | 0.007 | 17481  |
| 14       | 0.2114 | 2.17 | 0.0069 | 0.006 | 18134  |
| 15       | 0.2271 | 2.10 | 0.0071 | 0.004 | 19186  |
| 16       | 0.2427 | 2.03 | 0.0072 | 0.003 | 19656  |
| 17       | 0.2583 | 1.97 | 0.0073 | 0.002 | 20350  |
| 18       | 0.2739 | 1.91 | 0.0075 | 0.002 | 20875  |
| 19       | 0.2895 | 1.86 | 0.0076 | 0.001 | 19323  |
| 20       | 0.3052 | 1.81 | 0.0078 | 0.001 | 19531  |
| 21       | 0.3208 | 1.77 | 0.0079 | 0.001 | 19297  |
| 22       | 0.3364 | 1.72 | 0.0081 | 0.001 | 19800  |
| 23       | 0.3520 | 1.69 | 0.0082 | 0.000 | 21335  |
| 24       | 0.3676 | 1.65 | 0.0084 | 0.000 | 22031  |
| 25       | 0.3833 | 1.62 | 0.0086 | 0.000 | 23026  |
| 26       | 0.3989 | 1.58 | 0.0087 | 0.000 | 23405  |
| 27       | 0.4145 | 1.55 | 0.0089 | 0.000 | 24163  |
| 28       | 0.4301 | 1.52 | 0.0091 | 0.000 | 24731  |
| 29       | 0.4457 | 1.50 | 0.0093 | 0.000 | 25269  |
| 30       | 0.4613 | 1.47 | 0.0095 | 0.000 | 25779  |
| \$\$     |        |      |        |       |        |
| Overall: |        |      | 0.0077 | 0.011 | 516484 |

Matrix of correlations of  $E^2$  between runs

=====

Weighted correlation coefficients are calculated for each run pair in resolution ranges,  
then averaged over bins

Bins in averages over resolution are weighted by number of reflections

Run 1 maximum resolution 1.460 Dataset: New/New/New

Run 2 maximum resolution 1.460 Dataset: New/New/New

|     |           |       |
|-----|-----------|-------|
|     | Run       | 2     |
| Run | 1 CC(E^2) | 0.931 |
|     | N         | 56233 |

\$TABLE: ==== Run pair correlations by resolution:

\$GRAPHS:Run pair correlations by resolution:N:2,4:

\$ \$

| N  | 1/d^2  | Dmid  | CC2-1 | \$ \$ \$ \$ |
|----|--------|-------|-------|-------------|
| 1  | 0.0084 | 10.91 | 0.622 |             |
| 2  | 0.0240 | 6.45  | 0.987 |             |
| 3  | 0.0396 | 5.02  | 0.989 |             |
| 4  | 0.0553 | 4.25  | 0.995 |             |
| 5  | 0.0709 | 3.76  | 0.995 |             |
| 6  | 0.0865 | 3.40  | 0.993 |             |
| 7  | 0.1021 | 3.13  | 0.993 |             |
| 8  | 0.1177 | 2.91  | 0.991 |             |
| 9  | 0.1333 | 2.74  | 0.991 |             |
| 10 | 0.1490 | 2.59  | 0.992 |             |
| 11 | 0.1646 | 2.46  | 0.991 |             |
| 12 | 0.1802 | 2.36  | 0.990 |             |
| 13 | 0.1958 | 2.26  | 0.990 |             |
| 14 | 0.2114 | 2.17  | 0.989 |             |

|    |        |      |       |
|----|--------|------|-------|
| 15 | 0.2271 | 2.10 | 0.988 |
| 16 | 0.2427 | 2.03 | 0.987 |
| 17 | 0.2583 | 1.97 | 0.984 |
| 18 | 0.2739 | 1.91 | 0.981 |
| 19 | 0.2895 | 1.86 | 0.972 |
| 20 | 0.3051 | 1.81 | 0.967 |
| 21 | 0.3208 | 1.77 | 0.956 |
| 22 | 0.3364 | 1.72 | 0.947 |
| 23 | 0.3520 | 1.69 | 0.939 |
| 24 | 0.3676 | 1.65 | 0.932 |
| 25 | 0.3832 | 1.62 | 0.913 |
| 26 | 0.3988 | 1.58 | 0.893 |
| 27 | 0.4145 | 1.55 | 0.868 |
| 28 | 0.4301 | 1.52 | 0.842 |
| 29 | 0.4457 | 1.50 | 0.818 |
| 30 | 0.4613 | 1.47 | 0.748 |

\$\$

Overall: 0.941

=====

<!--SUMMARY\_BEGIN--> \$TEXT:Result: \$\$ \$\$

Summary data for Project: New Crystal: New Dataset: New

|                        | Overall | InnerShell | OuterShell |
|------------------------|---------|------------|------------|
| Low resolution limit   | 41.16   | 41.16      | 1.48       |
| High resolution limit  | 1.46    | 8.00       | 1.46       |
| Rmerge (within I+/I-)  | 0.123   | 0.101      | 0.667      |
| Rmerge (all I+ and I-) | 0.124   | 0.094      | 0.742      |
| Rmeas (within I+/I-)   | 0.151   | 0.141      | 0.809      |
| Rmeas (all I+ & I-)    | 0.139   | 0.127      | 0.812      |
| Rpim (within I+/I-)    | 0.085   | 0.098      | 0.447      |

|                                       |        |       |        |
|---------------------------------------|--------|-------|--------|
| Rpim (all I+ & I-)                    | 0.061  | 0.085 | 0.325  |
| Rmerge in top intensity bin           | 0.047  | –     | –      |
| Total number of observations          | 436606 | 724   | 25344  |
| Total number unique                   | 80454  | 369   | 4113   |
| Mean((I)/sd(I))                       | 9.7    | 19.6  | 2.5    |
| Mn(I) half-set correlation CC(1/2)    | 0.989  | 0.876 | 0.738  |
| Completeness                          | 96.4   | 66.6  | 99.8   |
| Multiplicity                          | 5.4    | 2.0   | 6.2    |
| Mean( $\chi^2$ )                      | 0.89   | 1.38  | 0.84   |
|                                       |        |       |        |
| Anomalous completeness                | 89.3   | 31.2  | 99.8   |
| Anomalous multiplicity                | 2.6    | 1.4   | 3.0    |
| DelAnom correlation between half-sets | –0.026 | 0.649 | –0.049 |
| Mid-Slope of Anom Normal Probability  | 0.924  | –     | –      |

The anomalous signal appears to be weak so anomalous flag was left OFF

Estimates of resolution limits: overall

from half-dataset correlation CC(1/2) > 0.30: limit = 1.46Å == maximum resolution  
from Mn(I/sd) > 1.50: limit = 1.46Å == maximum resolution  
from Mn(I/sd) > 2.00: limit = 1.46Å == maximum resolution

Estimates of resolution limits in reciprocal lattice directions:

Along h axis

from half-dataset correlation CC(1/2) > 0.30: limit = 1.46Å == maximum resolution  
from Mn(I/sd) > 1.50: limit = 1.46Å == maximum resolution

Along k axis

from half-dataset correlation CC(1/2) > 0.30: limit = 1.46Å == maximum resolution  
from Mn(I/sd) > 1.50: limit = 1.46Å == maximum resolution

Along l axis

from half-dataset correlation CC(1/2) > 0.30: limit = 1.46Å == maximum resolution  
from Mn(I/sd) > 1.50: limit = 1.46Å == maximum resolution

Anisotropic deltaB (i.e. range of principal components), A^2: 3.78

Average unit cell: 94.07 99.35 103.13 90.00 90.00 90.00

Space group: I 2 2 2

Average mosaicity: 0.04

Minimum and maximum SD correction factors: Fulls 0.74 17.74 Partials 0.25 26.73

\$\$ <!--SUMMARY\_END-->

=====

==== Writing merged data for dataset New/New/New to file  
/tmp/yoshihisasuzuki/merge\_roomtemp\_GI\_pf\_7\_3\_mtz. tmp

Number of reflections written 80454 maximum resolution 1.460

\$TEXT:Reference: \$\$ Please cite \$\$

P.R.Evans and G.N.Murshudov, 'How good are my data and what is the resolution?' Acta  
Cryst. D69, 1204-1214 (2013).

<a href="http://journals.iucr.org/d/issues/2013/07/00/ba5190/index.html">

<b>PDF</b></a>

\$\$

End of aimless job, total time: cpu time: 51.98 secs, elapsed time: 53.0 secs

<B><FONT COLOR=' #FF0000' ><!--SUMMARY\_BEGIN-->

<html> <!-- CCP4 HTML LOGFILE -->

<hr>

<pre>

#####  
#####  
#####

### CCP4 7.1.009: ctruncate version 1.17.29 : 02/01/18##

#####

User: yoshihisasuzuki Run date: 25/10/2021 Run time: 11:51:58

Please reference: Collaborative Computational Project, Number 4. 2011.

"Overview of the CCP4 suite and current developments". Acta Cryst. D67, 235-242.

as well as any specific reference in the program write-up.

<!--SUMMARY\_END--></FONT></B>

<B><FONT COLOR=' #FF0000' ><!--SUMMARY\_BEGIN-->

USER SUPPLIED INPUT:

hklin /tmp/yoshihisasuzuki/merge\_roomtemp\_GI\_pf\_7\_3\_mtz. tmp

hklout /tmp/yoshihisasuzuki/merge\_roomtemp\_GI\_pf\_7\_5\_mtz\_New. tmp

colin /\*/\*/[IMEAN, SIGIMEAN]

colano /\*/\*/[I (+), SIGI (+), I (-), SIGI (-)]

colout New

xmlout

/Users/yoshihisasuzuki/Documents/JCCG50/merge\_roomtemp\_GI\_pf/merge\_roomtemp\_GI\_pf\_7\_New\_ctruncate. xml

<!--SUMMARY\_END--></FONT></B>

\*\* JQ

Reflection File INFO:

Reflection file name: /tmp/yoshihisasuzuki/merge\_roomtemp\_GI\_pf\_7\_3\_mtz. tmp

Crystal/dataset names: /New/New

Spacegroup: I 2 2 2 (number 23)

Cell parameters: 94.0711 99.3468 103.1345 90.0000 90.0000 90.0000

Reflection Data INFO:

Reflection data type: I\_sigI

Number of observations (including Freidal mates): 80452

Number of unique reflections (excluding Freidal): 80452 (Acentric: 75888, Centric: 4564)

Resolution range of data: 41.156 – 1.460 Å

Maximum index h (a\*): 64 (1.470 Å) – by symm. – 64 (1.470 Å)

Maximum index k (b\*): 68 (1.461 Å) – by symm. – 68 (1.461 Å)

Maximum index l (c\*): 70 (1.473 Å) – by symm. – 70 (1.473 Å)

<B><FONT COLOR=' #FF0000' ><!--SUMMARY\_BEGIN-->

Estimated Optical Resolution: 1.293

<!--SUMMARY\_END--></FONT></B>

#### COMPLETENESS ANALYSIS (using intensities):

The following uses I/sigI Completeness levels, in particular targeting completeness above 85%. The Completeness with I/sigma above 3 indicates a strong signal (A better estimate is available using CC1/2 in aimless).

| I/sigI>N | range (Å)   | %refln   |
|----------|-------------|----------|
| 15.0     | NaN – NaN   | 0.0      |
| 10.0     | NaN – NaN   | 0.0      |
| 5.0      | 2.94 – 1.96 | 29.3     |
| 3.0      | 2.96 – 1.88 | 35.3 *** |
| 2.0      | 2.98 – 1.76 | 45.5     |
| 1.5      | 2.98 – 1.67 | 55.7     |
| 1.0      | 2.99 – 1.59 | 66.5     |
| N/A      | 3.03 – 1.46 |          |

The resolution range with I/sigI > 3 with completeness above 0.85, the estimated strong

data resolution range of this data, is 2.96Å to 1.88Å.

This corresponds to approximately 35% of the reflections in the file.

\$TABLE: Intensity Completeness analysis:

\$GRAPHS: Completeness & (I/sigI)>N v resolution:N:1,2,3,4,5,6,7,8:

: Completeness & Rstandard v resolution:N:1,2,9:

\$\$ 1/resol^2 Completeness (I/s>15) (I/s>10) (I/s>5) (I/s>3) (I/s>2) (I/s>1) Rstandard\$\$

\$\$

|        |       |       |       |       |       |       |       |       |
|--------|-------|-------|-------|-------|-------|-------|-------|-------|
| 0.0084 | 0.666 | 0.609 | 0.636 | 0.641 | 0.645 | 0.651 | 0.652 | 0.001 |
| 0.0185 | 0.738 | 0.677 | 0.730 | 0.733 | 0.734 | 0.735 | 0.735 | 0.001 |
| 0.0266 | 0.743 | 0.650 | 0.728 | 0.736 | 0.736 | 0.740 | 0.740 | 0.002 |
| 0.0337 | 0.755 | 0.681 | 0.747 | 0.752 | 0.752 | 0.752 | 0.752 | 0.001 |
| 0.0401 | 0.722 | 0.663 | 0.710 | 0.712 | 0.715 | 0.716 | 0.716 | 0.001 |
| 0.0460 | 0.744 | 0.674 | 0.733 | 0.735 | 0.737 | 0.739 | 0.740 | 0.001 |
| 0.0516 | 0.731 | 0.677 | 0.725 | 0.725 | 0.730 | 0.730 | 0.730 | 0.001 |
| 0.0570 | 0.729 | 0.657 | 0.721 | 0.727 | 0.727 | 0.729 | 0.729 | 0.001 |
| 0.0620 | 0.738 | 0.681 | 0.728 | 0.730 | 0.731 | 0.731 | 0.734 | 0.001 |
| 0.0670 | 0.749 | 0.698 | 0.742 | 0.744 | 0.745 | 0.747 | 0.747 | 0.001 |
| 0.0718 | 0.758 | 0.695 | 0.751 | 0.754 | 0.755 | 0.755 | 0.756 | 0.001 |
| 0.0763 | 0.750 | 0.668 | 0.728 | 0.734 | 0.737 | 0.739 | 0.747 | 0.001 |
| 0.0808 | 0.720 | 0.645 | 0.701 | 0.707 | 0.714 | 0.714 | 0.716 | 0.002 |
| 0.0852 | 0.766 | 0.669 | 0.753 | 0.761 | 0.763 | 0.765 | 0.765 | 0.001 |
| 0.0895 | 0.784 | 0.647 | 0.764 | 0.772 | 0.774 | 0.776 | 0.778 | 0.002 |
| 0.0937 | 0.788 | 0.675 | 0.769 | 0.777 | 0.784 | 0.784 | 0.786 | 0.002 |
| 0.0977 | 0.804 | 0.646 | 0.776 | 0.788 | 0.793 | 0.795 | 0.799 | 0.002 |
| 0.1017 | 0.773 | 0.628 | 0.749 | 0.762 | 0.767 | 0.769 | 0.773 | 0.002 |
| 0.1057 | 0.830 | 0.668 | 0.796 | 0.801 | 0.815 | 0.817 | 0.822 | 0.002 |
| 0.1095 | 0.854 | 0.668 | 0.827 | 0.839 | 0.840 | 0.840 | 0.844 | 0.002 |
| 0.1133 | 0.861 | 0.707 | 0.832 | 0.846 | 0.852 | 0.853 | 0.855 | 0.003 |
| 0.1171 | 0.895 | 0.737 | 0.863 | 0.871 | 0.881 | 0.883 | 0.883 | 0.003 |
| 0.1207 | 0.880 | 0.745 | 0.848 | 0.863 | 0.867 | 0.873 | 0.878 | 0.002 |
| 0.1244 | 0.910 | 0.748 | 0.883 | 0.897 | 0.900 | 0.902 | 0.903 | 0.002 |

|         |        |        |        |        |        |        |        |        |
|---------|--------|--------|--------|--------|--------|--------|--------|--------|
| 0. 1279 | 0. 909 | 0. 740 | 0. 877 | 0. 899 | 0. 901 | 0. 903 | 0. 904 | 0. 003 |
| 0. 1315 | 0. 918 | 0. 783 | 0. 875 | 0. 884 | 0. 891 | 0. 900 | 0. 900 | 0. 003 |
| 0. 1349 | 0. 918 | 0. 735 | 0. 879 | 0. 896 | 0. 910 | 0. 912 | 0. 915 | 0. 003 |
| 0. 1385 | 0. 916 | 0. 760 | 0. 882 | 0. 901 | 0. 907 | 0. 909 | 0. 911 | 0. 003 |
| 0. 1418 | 0. 962 | 0. 781 | 0. 917 | 0. 947 | 0. 949 | 0. 952 | 0. 955 | 0. 003 |
| 0. 1451 | 0. 949 | 0. 749 | 0. 895 | 0. 912 | 0. 923 | 0. 932 | 0. 939 | 0. 003 |
| 0. 1486 | 0. 957 | 0. 777 | 0. 924 | 0. 935 | 0. 938 | 0. 947 | 0. 954 | 0. 003 |
| 0. 1518 | 0. 963 | 0. 767 | 0. 915 | 0. 931 | 0. 939 | 0. 943 | 0. 953 | 0. 003 |
| 0. 1551 | 0. 981 | 0. 791 | 0. 917 | 0. 938 | 0. 958 | 0. 961 | 0. 961 | 0. 004 |
| 0. 1583 | 0. 980 | 0. 793 | 0. 935 | 0. 957 | 0. 964 | 0. 970 | 0. 971 | 0. 003 |
| 0. 1615 | 0. 969 | 0. 793 | 0. 906 | 0. 931 | 0. 945 | 0. 949 | 0. 955 | 0. 003 |
| 0. 1646 | 0. 983 | 0. 803 | 0. 926 | 0. 940 | 0. 953 | 0. 966 | 0. 970 | 0. 004 |
| 0. 1678 | 0. 987 | 0. 801 | 0. 936 | 0. 949 | 0. 955 | 0. 970 | 0. 974 | 0. 003 |
| 0. 1709 | 0. 978 | 0. 801 | 0. 935 | 0. 950 | 0. 963 | 0. 965 | 0. 967 | 0. 003 |
| 0. 1740 | 0. 983 | 0. 789 | 0. 931 | 0. 957 | 0. 967 | 0. 971 | 0. 976 | 0. 003 |
| 0. 1771 | 0. 992 | 0. 802 | 0. 934 | 0. 959 | 0. 969 | 0. 973 | 0. 980 | 0. 003 |
| 0. 1801 | 0. 979 | 0. 784 | 0. 917 | 0. 938 | 0. 951 | 0. 953 | 0. 961 | 0. 004 |
| 0. 1830 | 0. 975 | 0. 782 | 0. 908 | 0. 930 | 0. 951 | 0. 966 | 0. 970 | 0. 003 |
| 0. 1861 | 0. 993 | 0. 780 | 0. 909 | 0. 946 | 0. 962 | 0. 973 | 0. 980 | 0. 004 |
| 0. 1890 | 0. 998 | 0. 814 | 0. 924 | 0. 949 | 0. 969 | 0. 975 | 0. 979 | 0. 004 |
| 0. 1919 | 0. 984 | 0. 786 | 0. 924 | 0. 947 | 0. 962 | 0. 962 | 0. 968 | 0. 003 |
| 0. 1948 | 0. 990 | 0. 790 | 0. 924 | 0. 954 | 0. 966 | 0. 969 | 0. 974 | 0. 004 |
| 0. 1978 | 0. 993 | 0. 791 | 0. 914 | 0. 964 | 0. 967 | 0. 974 | 0. 983 | 0. 003 |
| 0. 2006 | 0. 995 | 0. 792 | 0. 925 | 0. 956 | 0. 967 | 0. 970 | 0. 986 | 0. 004 |
| 0. 2034 | 0. 998 | 0. 796 | 0. 923 | 0. 952 | 0. 963 | 0. 974 | 0. 977 | 0. 004 |
| 0. 2064 | 0. 999 | 0. 816 | 0. 939 | 0. 970 | 0. 978 | 0. 982 | 0. 987 | 0. 004 |
| 0. 2091 | 0. 994 | 0. 811 | 0. 925 | 0. 959 | 0. 963 | 0. 973 | 0. 981 | 0. 004 |
| 0. 2119 | 0. 993 | 0. 771 | 0. 900 | 0. 925 | 0. 949 | 0. 967 | 0. 977 | 0. 004 |
| 0. 2147 | 0. 999 | 0. 782 | 0. 908 | 0. 951 | 0. 970 | 0. 983 | 0. 992 | 0. 004 |
| 0. 2176 | 0. 994 | 0. 786 | 0. 907 | 0. 939 | 0. 959 | 0. 973 | 0. 983 | 0. 004 |
| 0. 2202 | 0. 999 | 0. 755 | 0. 912 | 0. 949 | 0. 969 | 0. 975 | 0. 983 | 0. 004 |
| 0. 2229 | 0. 996 | 0. 739 | 0. 907 | 0. 956 | 0. 964 | 0. 976 | 0. 984 | 0. 004 |
| 0. 2257 | 0. 998 | 0. 723 | 0. 892 | 0. 942 | 0. 960 | 0. 979 | 0. 984 | 0. 005 |

|         |        |        |        |        |        |        |        |        |
|---------|--------|--------|--------|--------|--------|--------|--------|--------|
| 0. 2284 | 0. 996 | 0. 740 | 0. 868 | 0. 933 | 0. 957 | 0. 972 | 0. 983 | 0. 004 |
| 0. 2311 | 0. 999 | 0. 705 | 0. 878 | 0. 931 | 0. 948 | 0. 964 | 0. 971 | 0. 005 |
| 0. 2337 | 0. 997 | 0. 731 | 0. 895 | 0. 926 | 0. 951 | 0. 965 | 0. 976 | 0. 005 |
| 0. 2363 | 0. 998 | 0. 707 | 0. 868 | 0. 920 | 0. 947 | 0. 964 | 0. 977 | 0. 005 |
| 0. 2390 | 0. 999 | 0. 670 | 0. 857 | 0. 917 | 0. 942 | 0. 948 | 0. 960 | 0. 006 |
| 0. 2416 | 1. 000 | 0. 728 | 0. 865 | 0. 908 | 0. 942 | 0. 964 | 0. 978 | 0. 005 |
| 0. 2441 | 1. 000 | 0. 694 | 0. 866 | 0. 918 | 0. 949 | 0. 958 | 0. 973 | 0. 006 |
| 0. 2468 | 1. 000 | 0. 685 | 0. 864 | 0. 918 | 0. 952 | 0. 963 | 0. 973 | 0. 005 |
| 0. 2494 | 1. 000 | 0. 697 | 0. 866 | 0. 914 | 0. 945 | 0. 963 | 0. 972 | 0. 006 |
| 0. 2520 | 0. 998 | 0. 629 | 0. 830 | 0. 906 | 0. 928 | 0. 953 | 0. 967 | 0. 006 |
| 0. 2545 | 1. 000 | 0. 665 | 0. 849 | 0. 908 | 0. 934 | 0. 944 | 0. 959 | 0. 006 |
| 0. 2570 | 0. 999 | 0. 675 | 0. 823 | 0. 902 | 0. 934 | 0. 961 | 0. 970 | 0. 006 |
| 0. 2596 | 1. 000 | 0. 668 | 0. 867 | 0. 924 | 0. 949 | 0. 957 | 0. 969 | 0. 007 |
| 0. 2622 | 1. 000 | 0. 622 | 0. 816 | 0. 877 | 0. 909 | 0. 934 | 0. 964 | 0. 007 |
| 0. 2647 | 1. 000 | 0. 621 | 0. 803 | 0. 893 | 0. 936 | 0. 953 | 0. 963 | 0. 007 |
| 0. 2671 | 0. 998 | 0. 614 | 0. 798 | 0. 877 | 0. 914 | 0. 939 | 0. 957 | 0. 008 |
| 0. 2695 | 0. 999 | 0. 638 | 0. 835 | 0. 928 | 0. 954 | 0. 962 | 0. 972 | 0. 007 |
| 0. 2721 | 0. 999 | 0. 577 | 0. 788 | 0. 859 | 0. 904 | 0. 931 | 0. 955 | 0. 008 |
| 0. 2746 | 1. 000 | 0. 562 | 0. 798 | 0. 878 | 0. 914 | 0. 942 | 0. 962 | 0. 008 |
| 0. 2770 | 1. 000 | 0. 567 | 0. 811 | 0. 893 | 0. 943 | 0. 964 | 0. 969 | 0. 008 |
| 0. 2794 | 1. 000 | 0. 552 | 0. 813 | 0. 897 | 0. 932 | 0. 943 | 0. 962 | 0. 009 |
| 0. 2819 | 0. 997 | 0. 527 | 0. 783 | 0. 862 | 0. 900 | 0. 932 | 0. 948 | 0. 010 |
| 0. 2843 | 0. 998 | 0. 443 | 0. 727 | 0. 830 | 0. 877 | 0. 916 | 0. 947 | 0. 013 |
| 0. 2867 | 0. 996 | 0. 422 | 0. 723 | 0. 826 | 0. 903 | 0. 924 | 0. 950 | 0. 011 |
| 0. 2892 | 1. 000 | 0. 424 | 0. 689 | 0. 833 | 0. 878 | 0. 899 | 0. 925 | 0. 018 |
| 0. 2915 | 0. 997 | 0. 401 | 0. 728 | 0. 828 | 0. 878 | 0. 923 | 0. 947 | 0. 013 |
| 0. 2939 | 0. 991 | 0. 414 | 0. 714 | 0. 819 | 0. 872 | 0. 915 | 0. 937 | 0. 014 |
| 0. 2963 | 0. 992 | 0. 420 | 0. 690 | 0. 816 | 0. 883 | 0. 905 | 0. 933 | 0. 013 |
| 0. 2986 | 0. 990 | 0. 340 | 0. 637 | 0. 780 | 0. 860 | 0. 889 | 0. 926 | 0. 016 |
| 0. 3010 | 0. 995 | 0. 387 | 0. 672 | 0. 779 | 0. 856 | 0. 894 | 0. 915 | 0. 015 |
| 0. 3034 | 0. 997 | 0. 365 | 0. 664 | 0. 801 | 0. 864 | 0. 881 | 0. 905 | 0. 014 |
| 0. 3057 | 0. 985 | 0. 361 | 0. 665 | 0. 788 | 0. 849 | 0. 885 | 0. 902 | 0. 015 |
| 0. 3080 | 0. 991 | 0. 363 | 0. 663 | 0. 782 | 0. 839 | 0. 870 | 0. 900 | 0. 016 |

|        |       |       |       |       |       |       |       |       |
|--------|-------|-------|-------|-------|-------|-------|-------|-------|
| 0.3103 | 0.997 | 0.374 | 0.678 | 0.784 | 0.853 | 0.881 | 0.932 | 0.014 |
| 0.3127 | 0.998 | 0.354 | 0.652 | 0.756 | 0.837 | 0.880 | 0.915 | 0.017 |
| 0.3150 | 1.000 | 0.391 | 0.682 | 0.810 | 0.879 | 0.898 | 0.930 | 0.014 |
| 0.3173 | 1.000 | 0.331 | 0.633 | 0.765 | 0.840 | 0.867 | 0.893 | 0.018 |
| 0.3195 | 1.000 | 0.324 | 0.650 | 0.795 | 0.861 | 0.894 | 0.925 | 0.018 |
| 0.3218 | 1.000 | 0.299 | 0.599 | 0.779 | 0.849 | 0.885 | 0.921 | 0.019 |
| 0.3241 | 1.000 | 0.316 | 0.641 | 0.778 | 0.837 | 0.867 | 0.926 | 0.018 |
| 0.3264 | 1.000 | 0.259 | 0.595 | 0.769 | 0.840 | 0.877 | 0.928 | 0.020 |
| 0.3287 | 0.998 | 0.274 | 0.569 | 0.736 | 0.825 | 0.864 | 0.910 | 0.022 |
| 0.3308 | 1.000 | 0.259 | 0.588 | 0.736 | 0.827 | 0.878 | 0.910 | 0.021 |
| 0.3331 | 1.000 | 0.230 | 0.570 | 0.740 | 0.815 | 0.854 | 0.900 | 0.024 |
| 0.3353 | 0.999 | 0.287 | 0.598 | 0.727 | 0.808 | 0.851 | 0.899 | 0.021 |
| 0.3376 | 1.000 | 0.284 | 0.606 | 0.767 | 0.834 | 0.886 | 0.926 | 0.020 |
| 0.3399 | 1.000 | 0.271 | 0.569 | 0.731 | 0.828 | 0.871 | 0.914 | 0.022 |
| 0.3421 | 0.988 | 0.267 | 0.553 | 0.709 | 0.787 | 0.828 | 0.885 | 0.023 |
| 0.3442 | 0.987 | 0.239 | 0.541 | 0.705 | 0.781 | 0.821 | 0.872 | 0.024 |
| 0.3463 | 0.997 | 0.223 | 0.534 | 0.680 | 0.784 | 0.842 | 0.890 | 0.027 |
| 0.3486 | 1.000 | 0.180 | 0.477 | 0.665 | 0.753 | 0.813 | 0.881 | 0.029 |
| 0.3508 | 1.000 | 0.217 | 0.536 | 0.679 | 0.791 | 0.855 | 0.903 | 0.026 |
| 0.3531 | 1.000 | 0.199 | 0.511 | 0.692 | 0.790 | 0.839 | 0.888 | 0.028 |
| 0.3552 | 0.999 | 0.177 | 0.453 | 0.631 | 0.734 | 0.803 | 0.870 | 0.169 |
| 0.3573 | 0.999 | 0.191 | 0.512 | 0.692 | 0.778 | 0.832 | 0.869 | 0.030 |
| 0.3594 | 1.000 | 0.185 | 0.481 | 0.662 | 0.775 | 0.851 | 0.901 | 0.033 |
| 0.3616 | 0.998 | 0.165 | 0.470 | 0.668 | 0.777 | 0.830 | 0.887 | 0.032 |
| 0.3637 | 1.000 | 0.168 | 0.445 | 0.630 | 0.731 | 0.808 | 0.873 | 0.035 |
| 0.3659 | 1.000 | 0.183 | 0.472 | 0.637 | 0.764 | 0.811 | 0.872 | 0.034 |
| 0.3681 | 1.000 | 0.188 | 0.502 | 0.685 | 0.777 | 0.818 | 0.880 | 0.045 |
| 0.3702 | 1.000 | 0.181 | 0.456 | 0.633 | 0.739 | 0.786 | 0.847 | 0.034 |
| 0.3723 | 1.000 | 0.132 | 0.484 | 0.664 | 0.742 | 0.814 | 0.873 | 0.035 |
| 0.3743 | 1.000 | 0.151 | 0.436 | 0.637 | 0.747 | 0.801 | 0.855 | 0.038 |
| 0.3766 | 1.000 | 0.135 | 0.443 | 0.614 | 0.716 | 0.783 | 0.847 | 0.035 |
| 0.3787 | 0.999 | 0.130 | 0.447 | 0.637 | 0.742 | 0.804 | 0.867 | 0.038 |
| 0.3807 | 0.999 | 0.146 | 0.434 | 0.611 | 0.719 | 0.798 | 0.845 | 0.296 |

|        |       |       |       |       |       |       |       |       |
|--------|-------|-------|-------|-------|-------|-------|-------|-------|
| 0.3829 | 1.000 | 0.113 | 0.388 | 0.601 | 0.729 | 0.796 | 0.857 | 0.047 |
| 0.3850 | 1.000 | 0.124 | 0.413 | 0.647 | 0.757 | 0.824 | 0.875 | 0.038 |
| 0.3870 | 1.000 | 0.129 | 0.376 | 0.569 | 0.675 | 0.746 | 0.809 | 0.044 |
| 0.3890 | 1.000 | 0.106 | 0.345 | 0.549 | 0.706 | 0.768 | 0.853 | 0.048 |
| 0.3911 | 1.000 | 0.096 | 0.391 | 0.582 | 0.717 | 0.782 | 0.856 | 0.045 |
| 0.3932 | 1.000 | 0.099 | 0.361 | 0.577 | 0.703 | 0.771 | 0.835 | 0.048 |
| 0.3953 | 1.000 | 0.095 | 0.361 | 0.568 | 0.693 | 0.757 | 0.810 | 0.052 |
| 0.3974 | 0.997 | 0.098 | 0.358 | 0.560 | 0.707 | 0.776 | 0.856 | 0.046 |
| 0.3994 | 1.000 | 0.082 | 0.365 | 0.526 | 0.698 | 0.753 | 0.825 | 0.052 |
| 0.4014 | 1.000 | 0.083 | 0.346 | 0.552 | 0.704 | 0.783 | 0.843 | 0.052 |
| 0.4034 | 1.000 | 0.079 | 0.303 | 0.522 | 0.705 | 0.765 | 0.841 | 0.052 |
| 0.4055 | 0.999 | 0.074 | 0.276 | 0.511 | 0.680 | 0.757 | 0.845 | 0.061 |
| 0.4076 | 1.000 | 0.071 | 0.331 | 0.530 | 0.683 | 0.777 | 0.838 | 0.054 |
| 0.4096 | 1.000 | 0.058 | 0.271 | 0.489 | 0.656 | 0.740 | 0.805 | 2.252 |
| 0.4116 | 1.000 | 0.061 | 0.311 | 0.523 | 0.630 | 0.710 | 0.817 | 0.057 |
| 0.4137 | 1.000 | 0.036 | 0.247 | 0.474 | 0.636 | 0.713 | 0.801 | 0.070 |
| 0.4156 | 0.998 | 0.063 | 0.300 | 0.535 | 0.690 | 0.778 | 0.847 | 0.053 |
| 0.4176 | 1.000 | 0.046 | 0.291 | 0.516 | 0.651 | 0.738 | 0.814 | 0.057 |
| 0.4196 | 1.000 | 0.060 | 0.298 | 0.479 | 0.636 | 0.714 | 0.795 | 3.211 |
| 0.4216 | 0.999 | 0.048 | 0.244 | 0.471 | 0.585 | 0.671 | 0.789 | 0.073 |
| 0.4237 | 1.000 | 0.082 | 0.304 | 0.483 | 0.637 | 0.722 | 0.824 | 0.064 |
| 0.4256 | 1.000 | 0.044 | 0.279 | 0.460 | 0.599 | 0.715 | 0.795 | 0.065 |
| 0.4276 | 1.000 | 0.040 | 0.249 | 0.446 | 0.594 | 0.685 | 0.789 | 0.075 |
| 0.4296 | 1.000 | 0.034 | 0.238 | 0.453 | 0.602 | 0.679 | 0.763 | 0.068 |
| 0.4316 | 1.000 | 0.042 | 0.218 | 0.428 | 0.592 | 0.686 | 0.782 | 0.087 |
| 0.4335 | 0.999 | 0.033 | 0.227 | 0.461 | 0.602 | 0.694 | 0.782 | 0.076 |
| 0.4354 | 0.999 | 0.026 | 0.212 | 0.429 | 0.580 | 0.668 | 0.781 | 0.085 |
| 0.4374 | 1.000 | 0.041 | 0.226 | 0.458 | 0.626 | 0.713 | 0.800 | 0.068 |
| 0.4394 | 1.000 | 0.030 | 0.239 | 0.450 | 0.612 | 0.695 | 0.797 | 0.081 |
| 0.4414 | 1.000 | 0.047 | 0.198 | 0.415 | 0.578 | 0.652 | 0.762 | 0.085 |
| 0.4433 | 1.000 | 0.020 | 0.189 | 0.394 | 0.541 | 0.638 | 0.746 | 0.093 |
| 0.4453 | 1.000 | 0.035 | 0.204 | 0.420 | 0.600 | 0.680 | 0.774 | 0.081 |
| 0.4472 | 1.000 | 0.034 | 0.195 | 0.385 | 0.569 | 0.654 | 0.752 | 0.086 |

|        |       |       |       |       |       |       |       |       |
|--------|-------|-------|-------|-------|-------|-------|-------|-------|
| 0.4491 | 0.998 | 0.039 | 0.210 | 0.382 | 0.552 | 0.653 | 0.757 | 0.098 |
| 0.4511 | 1.000 | 0.018 | 0.183 | 0.380 | 0.569 | 0.660 | 0.751 | 0.100 |
| 0.4530 | 0.998 | 0.014 | 0.152 | 0.355 | 0.534 | 0.624 | 0.736 | 0.099 |
| 0.4550 | 1.000 | 0.027 | 0.170 | 0.385 | 0.501 | 0.611 | 0.742 | 0.107 |
| 0.4569 | 1.000 | 0.014 | 0.139 | 0.336 | 0.514 | 0.601 | 0.722 | 0.199 |
| 0.4588 | 1.000 | 0.006 | 0.127 | 0.324 | 0.488 | 0.588 | 0.696 | 0.118 |
| 0.4607 | 1.000 | 0.019 | 0.151 | 0.321 | 0.497 | 0.620 | 0.709 | 0.104 |
| 0.4626 | 1.000 | 0.006 | 0.150 | 0.357 | 0.495 | 0.608 | 0.729 | 0.120 |
| 0.4645 | 1.000 | 0.008 | 0.119 | 0.296 | 0.488 | 0.602 | 0.699 | 0.123 |
| 0.4663 | 1.000 | 0.004 | 0.149 | 0.328 | 0.459 | 0.572 | 0.682 | 0.121 |
| 0.4682 | 0.962 | 0.008 | 0.132 | 0.316 | 0.501 | 0.573 | 0.685 | 0.120 |

\$\$

The completeness at various resolution limit plots gives the completeness after applying a  $I/\sigma I$  cutoff. The profiles give an indication of the quality of the data. The Rstandard plot ( $\langle \sigma F \rangle / \langle F \rangle$ ) gives an alternative indicator. Strongly recorded resolution bins would typically have values below 0.1.

Low Resolution Intensity Completeness analysis:

| $1/\text{resol}^2$ | Range       | Completeness      |
|--------------------|-------------|-------------------|
| 0.0026             | 0.000–0.004 | 0.629 [22.8:36.2] |
| 0.0059             | 0.004–0.007 | 0.665 [28.0:42.1] |
| 0.0085             | 0.007–0.010 | 0.638 [27.5:43.1] |
| 0.0109             | 0.010–0.012 | 0.691 [29.4:42.5] |
| 0.0129             | 0.012–0.014 | 0.699 [30.5:43.6] |
| 0.0149             | 0.014–0.016 | 0.703 [32.2:45.9] |
| 0.0169             | 0.016–0.018 | 0.742 [32.8:44.1] |
| 0.0186             | 0.018–0.020 | 0.752 [33.8:44.9] |
| 0.0203             | 0.020–0.021 | 0.770 [35.5:46.1] |
| 0.0219             | 0.021–0.023 | 0.966 [42.6:44.1] |

Low completeness at low resolution can lead to map distortions and other difficulties.

This often arises through experimental effects such as incorrectly aligned crystal, poorly positioned backstop, or over exposure.

#### ICE RING SUMMARY:

| reso             | ice_ring | mean_I | mean_Sigma | Estimated_I | Ratio | Zscore | Completeness |
|------------------|----------|--------|------------|-------------|-------|--------|--------------|
| Ave_Completeness |          |        |            |             |       |        |              |
| 3.90             | no       | 978.65 | 55.64      | 918.99      | 1.06  | 1.07   | 0.74         |
| 3.67             | no       | 862.37 | 50.66      | 784.67      | 1.10  | 1.53   | 0.74         |
| 3.44             | no       | 677.74 | 40.72      | 598.68      | 1.13  | 1.94   | 0.74         |
| 2.67             | no       | 230.22 | 15.53      | 235.77      | 0.98  | -0.36  | 0.94         |
| 2.25             | no       | 163.39 | 10.51      | 159.38      | 1.03  | 0.38   | 0.99         |
| 2.08             | no       | 109.43 | 6.96       | 122.75      | 0.89  | -1.91  | 1.00         |
| 1.95             | no       | 73.52  | 5.34       | 74.81       | 0.98  | -0.24  | 1.00         |
| 1.92             | no       | 67.17  | 4.98       | 70.49       | 0.95  | -0.67  | 1.00         |
| 1.89             | no       | 60.39  | 4.90       | 60.55       | 1.00  | -0.03  | 1.00         |
| 1.73             | no       | 32.47  | 4.44       | 32.44       | 1.00  | 0.01   | 1.00         |

The ice rings table shows data Z-scores and completeness for ice ring sensitive resolutions in comparison with neighbouring ice-ring insensitive resolutions. Large z-scores and low completeness at give a strong hint to the presence of ice rings. It may be required to exclude these resolution ranges.

#### WILSON SCALING:

Estimated number of residues = 349

Results Wilson B-factor:

Estimate of Wilson B factor: 11.586 Å<sup>-2</sup>, with sigma 0.474

Estimate of scale factor on intensity = 1982.3726 (intercept -7.592, sigma 0.052)

The isotropic Wilson temperature estimate (B-value) is an approximation to the fall-off of scattering with resolution. This should be correlated with the refined atomic B-values. This averages out any anisotropy in the experimental observations. This approximation will be misleading for strongly anisotropic data.

\$TABLE: Wilson plot:

\$GRAPHS: Wilson plot - estimated B factor = 11.6 :A:1,2,3:

\$\$ 1/resol^2 ln(I/I\_th) Reference\_prot \$\$

\$\$

|         |          |          |
|---------|----------|----------|
| 0.02166 | -8.00722 | -8.18965 |
| 0.04685 | -7.50540 | -7.45367 |
| 0.06627 | -7.44663 | -7.45442 |
| 0.08303 | -7.69621 | -7.62101 |
| 0.09767 | -8.04866 | -7.88480 |
| 0.11062 | -8.28493 | -8.09230 |
| 0.12200 | -8.33333 | -8.26309 |
| 0.13257 | -8.44431 | -8.38936 |
| 0.14253 | -8.49096 | -8.45610 |
| 0.15185 | -8.53921 | -8.51494 |
| 0.16074 | -8.55679 | -8.56205 |
| 0.16934 | -8.51572 | -8.59192 |
| 0.17772 | -8.52940 | -8.60559 |
| 0.18592 | -8.61024 | -8.61945 |
| 0.19385 | -8.57865 | -8.62870 |
| 0.20161 | -8.58028 | -8.65241 |
| 0.20925 | -8.66261 | -8.68496 |
| 0.21672 | -8.71641 | -8.73029 |
| 0.22402 | -8.78098 | -8.75381 |
| 0.23128 | -8.84603 | -8.80083 |
| 0.23838 | -8.97100 | -8.87236 |

|          |            |            |
|----------|------------|------------|
| 0. 24534 | -8. 93536  | -8. 92963  |
| 0. 25229 | -9. 02804  | -9. 00279  |
| 0. 25903 | -9. 11531  | -9. 08104  |
| 0. 26579 | -9. 13396  | -9. 16276  |
| 0. 27242 | -9. 25593  | -9. 24934  |
| 0. 27897 | -9. 28369  | -9. 32367  |
| 0. 28550 | -9. 40396  | -9. 39266  |
| 0. 29190 | -9. 47645  | -9. 47176  |
| 0. 29831 | -9. 53929  | -9. 54070  |
| 0. 30468 | -9. 56963  | -9. 61264  |
| 0. 31093 | -9. 58158  | -9. 66932  |
| 0. 31712 | -9. 61171  | -9. 72026  |
| 0. 32317 | -9. 70405  | -9. 77123  |
| 0. 32928 | -9. 78355  | -9. 80869  |
| 0. 33520 | -9. 78440  | -9. 84274  |
| 0. 34125 | -9. 81320  | -9. 88985  |
| 0. 34708 | -9. 89546  | -9. 93279  |
| 0. 35302 | -9. 96617  | -9. 98264  |
| 0. 35875 | -9. 97845  | -10. 00988 |
| 0. 36449 | -10. 03800 | -10. 02878 |
| 0. 37026 | -10. 01220 | -10. 05962 |
| 0. 37587 | -10. 09203 | -10. 08518 |
| 0. 38152 | -10. 12210 | -10. 12396 |
| 0. 38707 | -10. 16276 | -10. 15444 |
| 0. 39262 | -10. 19416 | -10. 18257 |
| 0. 39816 | -10. 24997 | -10. 21973 |
| 0. 40356 | -10. 31630 | -10. 24841 |
| 0. 40906 | -10. 32740 | -10. 27098 |
| 0. 41447 | -10. 39992 | -10. 29696 |
| 0. 41974 | -10. 41622 | -10. 33613 |
| 0. 42516 | -10. 38159 | -10. 37264 |
| 0. 43045 | -10. 52482 | -10. 39737 |
| 0. 43563 | -10. 47294 | -10. 42193 |

```

0.44093 -10.51582 -10.44619
0.44612 -10.51888 -10.48574
0.45125 -10.57763 -10.52837
0.45646 -10.66382 -10.56387
0.46155 -10.72869 -10.59328
0.46657 -10.73044 -10.62582

```

\$\$

Computed using Popov & Bourenkov, Acta D (2003) D59, 1145

The wilson plot shows the fall off of the mean intensity with resolution. This is then used calculate an absolute scale and temperature factor for a set of observed intensities, using the theory of A C Wilson. The reference\_plot is based upon an analysis of high resolution datasets in the PDB (BEST), which takes into account the none random distribution of atoms within the crystal. Some deviation from the reference plot is to be expected, however, significant deviation may indicate problems, such as ice rings, detector issues, or missprocessed.

#### OUTLIER RING SUMMARY:

Outliers total 1.0% of the bins.

| reso | mean_I | mean_Sigma | Estimated_I | Ratio | Zscore | Completeness | Ave_Completeness |
|------|--------|------------|-------------|-------|--------|--------------|------------------|
| 3.20 | 349.14 | 23.22      | 493.11      | 0.71  | -6.20  | 0.76         | 0.80             |
| 3.05 | 291.12 | 17.48      | 410.78      | 0.71  | -6.85  | 0.85         | 0.82             |
| 2.97 | 262.30 | 15.50      | 360.66      | 0.73  | -6.34  | 0.85         | 0.86             |
| 2.91 | 213.97 | 14.46      | 338.39      | 0.63  | -8.61  | 0.86         | 0.88             |

The outlier rings table shows data Z-scores and completeness for problem resolution bins in comparison with the Wilson B-factor fit. Large z-scores and low completeness at give a strong hint to the presence of problems. It may be required to exclude these resolution ranges.

Estimated limits of anomalous signal:

Bijvoet ratio ( $\langle \Delta I \rangle / \langle I \rangle$ ) > 1.0% : 9.24 – 1.46 A  
Anomalous signal to noise ( $\langle \Delta I / \sigma I \rangle$ ) > 1.3 : NaN – NaN  
Measurability limit ( $N_{\text{anon}} / N_{\text{ov}}$ ) > 5% : NaN – NaN

Warning: NO anomalous signal.

These calculations are performed using scaled and merged data. More accurate estimates of the limit of the anomalous signal can be obtained using scaled and unmerged data in the half dataset correlation calculation of aimless.

The measurability is defined as the fraction of the anomalous differences for which the signal to noise for  $\Delta I$ ,

$I(+)$  and  $I(-)$  are all > 3. The resolution limits are derived from  $I/\sigma I$  of 1.2 for the signal to noise, and measurability above 5%.

For well processed data having more than 5% of the measured data satisfying this criteria is a good

indicator, particularly when combined with a significant mean signal to noise of the anomalous difference in a resolution shell.

\$TABLE: Intensity anomalous analysis:

\$GRAPHS: Mn( $dI/\sigma dI$ ) v resolution:N:1,2:

: Mn( $dI/I$ ) v resolution:N:1,3:

: Mesurability v resolution:N:1,4:

\$\$ 1/resol<sup>2</sup> Mn( $dI/\sigma dI$ ) Mn( $dI/I$ ) measurability\$\$

\$\$

|          |            |            |            |
|----------|------------|------------|------------|
| 0.011716 | 1.3533e+00 | 4.5517e-02 | 1.9640e-02 |
| 0.024529 | 3.6426e-01 | 2.5031e-02 | 8.5470e-03 |
| 0.034265 | 3.7123e-01 | 2.8597e-02 | 4.2150e-03 |

|           |             |             |             |
|-----------|-------------|-------------|-------------|
| 0. 043020 | 3. 8968e-01 | 3. 2182e-02 | 4. 2083e-03 |
| 0. 050940 | 3. 7062e-01 | 2. 6770e-02 | 4. 1754e-03 |
| 0. 058366 | 3. 2412e-01 | 2. 3568e-02 | 6. 2112e-03 |
| 0. 065334 | 3. 6274e-01 | 2. 5257e-02 | 0. 0000e+00 |
| 0. 071759 | 3. 5911e-01 | 2. 6235e-02 | 8. 3770e-03 |
| 0. 077995 | 3. 0229e-01 | 2. 0217e-02 | 0. 0000e+00 |
| 0. 084148 | 3. 6179e-01 | 2. 3504e-02 | 4. 1537e-03 |
| 0. 089747 | 3. 3980e-01 | 2. 2447e-02 | 0. 0000e+00 |
| 0. 095073 | 4. 0449e-01 | 2. 6305e-02 | 0. 0000e+00 |
| 0. 100229 | 3. 9482e-01 | 2. 8423e-02 | 2. 0640e-03 |
| 0. 105312 | 4. 2908e-01 | 3. 3235e-02 | 6. 1038e-03 |
| 0. 109932 | 3. 7114e-01 | 2. 9421e-02 | 0. 0000e+00 |
| 0. 114403 | 4. 7419e-01 | 3. 4466e-02 | 4. 1863e-03 |
| 0. 118521 | 4. 9111e-01 | 3. 5760e-02 | 4. 1026e-03 |
| 0. 122789 | 4. 9268e-01 | 4. 1190e-02 | 2. 0587e-03 |
| 0. 126724 | 4. 8065e-01 | 3. 7527e-02 | 2. 0346e-03 |
| 0. 130744 | 5. 5131e-01 | 4. 5511e-02 | 6. 2016e-03 |
| 0. 134482 | 5. 2192e-01 | 4. 6076e-02 | 0. 0000e+00 |
| 0. 138352 | 5. 6705e-01 | 5. 0241e-02 | 2. 0429e-03 |
| 0. 141929 | 6. 0054e-01 | 5. 5876e-02 | 8. 3507e-03 |
| 0. 145480 | 5. 7338e-01 | 5. 7881e-02 | 2. 0502e-03 |
| 0. 149032 | 5. 7339e-01 | 5. 2760e-02 | 4. 1005e-03 |
| 0. 152404 | 5. 5906e-01 | 5. 3638e-02 | 0. 0000e+00 |
| 0. 155795 | 5. 9134e-01 | 6. 0329e-02 | 0. 0000e+00 |
| 0. 159115 | 6. 0228e-01 | 6. 0148e-02 | 4. 0692e-03 |
| 0. 162387 | 5. 8070e-01 | 5. 5251e-02 | 2. 0790e-03 |
| 0. 165680 | 6. 1710e-01 | 6. 2153e-02 | 2. 0419e-03 |
| 0. 168836 | 5. 7351e-01 | 5. 4478e-02 | 4. 1152e-03 |
| 0. 171983 | 6. 3491e-01 | 6. 3281e-02 | 2. 0768e-03 |
| 0. 175166 | 5. 9507e-01 | 5. 9993e-02 | 4. 0984e-03 |
| 0. 178221 | 6. 3042e-01 | 6. 9328e-02 | 2. 0715e-03 |
| 0. 181290 | 6. 2739e-01 | 6. 7906e-02 | 0. 0000e+00 |
| 0. 184418 | 6. 4512e-01 | 7. 2833e-02 | 0. 0000e+00 |

|          |            |            |            |
|----------|------------|------------|------------|
| 0.187459 | 6.2747e-01 | 6.5209e-02 | 2.0877e-03 |
| 0.190375 | 6.5153e-01 | 6.3622e-02 | 2.0367e-03 |
| 0.193310 | 6.4490e-01 | 6.8788e-02 | 2.0597e-03 |
| 0.196369 | 6.5776e-01 | 7.0862e-02 | 6.1381e-03 |
| 0.199240 | 6.1299e-01 | 6.6955e-02 | 2.0429e-03 |
| 0.202069 | 6.2883e-01 | 6.6160e-02 | 0.0000e+00 |
| 0.204951 | 6.2901e-01 | 7.3183e-02 | 0.0000e+00 |
| 0.207884 | 7.0715e-01 | 7.8241e-02 | 6.1665e-03 |
| 0.210570 | 6.7971e-01 | 7.3237e-02 | 0.0000e+00 |
| 0.213399 | 6.6481e-01 | 8.3205e-02 | 2.0587e-03 |
| 0.216227 | 6.7355e-01 | 7.4856e-02 | 2.0233e-03 |
| 0.219107 | 7.4702e-01 | 8.9327e-02 | 4.1068e-03 |
| 0.221656 | 6.9198e-01 | 8.1064e-02 | 4.1110e-03 |
| 0.224502 | 7.4760e-01 | 8.6146e-02 | 4.1068e-03 |
| 0.227199 | 7.4216e-01 | 8.7823e-02 | 4.1195e-03 |
| 0.229964 | 7.0744e-01 | 8.4718e-02 | 2.0408e-03 |
| 0.232565 | 7.0660e-01 | 8.8545e-02 | 4.1089e-03 |
| 0.235217 | 7.1075e-01 | 8.6249e-02 | 2.0460e-03 |
| 0.237903 | 6.8548e-01 | 8.7518e-02 | 4.1558e-03 |
| 0.240596 | 6.7926e-01 | 8.8230e-02 | 0.0000e+00 |
| 0.243178 | 6.9265e-01 | 8.6186e-02 | 8.2988e-03 |
| 0.245737 | 7.0988e-01 | 9.0940e-02 | 0.0000e+00 |
| 0.248345 | 6.8445e-01 | 8.6081e-02 | 4.1110e-03 |
| 0.250992 | 7.3501e-01 | 9.6093e-02 | 4.0942e-03 |
| 0.253587 | 7.2370e-01 | 9.6786e-02 | 2.0597e-03 |
| 0.256035 | 7.5008e-01 | 1.0147e-01 | 2.0305e-03 |
| 0.258585 | 6.9456e-01 | 9.0097e-02 | 2.0387e-03 |
| 0.261199 | 7.4842e-01 | 1.0614e-01 | 2.0566e-03 |
| 0.263742 | 7.0212e-01 | 9.8721e-02 | 0.0000e+00 |
| 0.266206 | 6.7056e-01 | 1.0047e-01 | 2.0263e-03 |
| 0.268637 | 7.7295e-01 | 1.1178e-01 | 2.0555e-03 |
| 0.271135 | 8.1445e-01 | 1.1721e-01 | 6.1538e-03 |
| 0.273701 | 7.7526e-01 | 1.1920e-01 | 6.1412e-03 |

|           |             |             |             |
|-----------|-------------|-------------|-------------|
| 0. 276181 | 7. 5760e-01 | 1. 2002e-01 | 0. 0000e+00 |
| 0. 278550 | 7. 4957e-01 | 1. 1861e-01 | 2. 0263e-03 |
| 0. 281026 | 7. 4480e-01 | 1. 2501e-01 | 2. 0305e-03 |
| 0. 283464 | 7. 4962e-01 | 1. 3231e-01 | 2. 0801e-03 |
| 0. 285875 | 7. 4387e-01 | 1. 3870e-01 | 4. 0858e-03 |
| 0. 288368 | 6. 9388e-01 | 1. 3788e-01 | 2. 0812e-03 |
| 0. 290659 | 7. 4828e-01 | 1. 5101e-01 | 2. 0141e-03 |
| 0. 293113 | 7. 3506e-01 | 1. 4332e-01 | 3. 9565e-03 |
| 0. 295566 | 6. 7598e-01 | 1. 3451e-01 | 4. 1951e-03 |
| 0. 297885 | 7. 4795e-01 | 1. 6310e-01 | 6. 1856e-03 |
| 0. 300302 | 6. 9483e-01 | 1. 6163e-01 | 6. 0976e-03 |
| 0. 302712 | 7. 7745e-01 | 1. 6958e-01 | 2. 0534e-03 |
| 0. 305021 | 7. 1150e-01 | 1. 4696e-01 | 7. 9562e-03 |
| 0. 307420 | 7. 7210e-01 | 1. 6407e-01 | 6. 1100e-03 |
| 0. 309742 | 7. 7325e-01 | 1. 5805e-01 | 6. 1350e-03 |
| 0. 312138 | 7. 6335e-01 | 1. 7461e-01 | 4. 1068e-03 |
| 0. 314478 | 7. 5809e-01 | 1. 5972e-01 | 6. 0852e-03 |
| 0. 316779 | 7. 4352e-01 | 1. 7106e-01 | 1. 6495e-02 |
| 0. 318982 | 7. 1059e-01 | 1. 7280e-01 | 6. 1038e-03 |
| 0. 321263 | 7. 4598e-01 | 1. 8801e-01 | 6. 1100e-03 |
| 0. 323550 | 7. 3333e-01 | 1. 8557e-01 | 4. 0984e-03 |
| 0. 325882 | 7. 0289e-01 | 1. 8761e-01 | 4. 0858e-03 |
| 0. 328235 | 7. 1822e-01 | 1. 9827e-01 | 8. 1301e-03 |
| 0. 330356 | 7. 3213e-01 | 2. 0879e-01 | 4. 1258e-03 |
| 0. 332581 | 7. 2343e-01 | 2. 0149e-01 | 8. 1466e-03 |
| 0. 334786 | 6. 9786e-01 | 1. 9865e-01 | 2. 0284e-03 |
| 0. 337118 | 8. 0654e-01 | 2. 2383e-01 | 4. 0568e-03 |
| 0. 339374 | 7. 3576e-01 | 2. 0500e-01 | 2. 0715e-03 |
| 0. 341613 | 7. 7117e-01 | 2. 2300e-01 | 2. 0233e-03 |
| 0. 343810 | 7. 4144e-01 | 2. 0279e-01 | 2. 0367e-03 |
| 0. 345959 | 7. 2009e-01 | 2. 1271e-01 | 0. 0000e+00 |
| 0. 348164 | 7. 1688e-01 | 2. 2871e-01 | 2. 0408e-03 |
| 0. 350385 | 7. 8650e-01 | 2. 4243e-01 | 0. 0000e+00 |

|          |            |            |            |
|----------|------------|------------|------------|
| 0.352688 | 7.4583e-01 | 2.3411e-01 | 0.0000e+00 |
| 0.354878 | 7.7051e-01 | 2.5656e-01 | 4.1195e-03 |
| 0.356934 | 7.7975e-01 | 2.6633e-01 | 6.1350e-03 |
| 0.359066 | 7.6828e-01 | 2.5775e-01 | 0.0000e+00 |
| 0.361316 | 7.8845e-01 | 2.5780e-01 | 1.0096e-02 |
| 0.363403 | 8.1141e-01 | 2.8817e-01 | 2.0555e-03 |
| 0.365607 | 7.7002e-01 | 2.7162e-01 | 4.0424e-03 |
| 0.367826 | 7.1970e-01 | 2.5185e-01 | 0.0000e+00 |
| 0.369919 | 7.9283e-01 | 2.6681e-01 | 4.1068e-03 |
| 0.371982 | 7.7392e-01 | 2.7637e-01 | 2.0243e-03 |
| 0.374005 | 7.6477e-01 | 2.8357e-01 | 4.0942e-03 |
| 0.376260 | 7.8045e-01 | 2.8972e-01 | 2.0040e-03 |
| 0.378373 | 7.6699e-01 | 3.0203e-01 | 4.1152e-03 |
| 0.380422 | 7.7835e-01 | 3.0910e-01 | 2.0608e-03 |
| 0.382627 | 7.1863e-01 | 2.7850e-01 | 4.0201e-03 |
| 0.384691 | 7.1747e-01 | 2.8424e-01 | 6.1507e-03 |
| 0.386730 | 7.6282e-01 | 3.1200e-01 | 4.0692e-03 |
| 0.388763 | 7.4343e-01 | 3.2796e-01 | 4.0465e-03 |
| 0.390844 | 7.4578e-01 | 3.1485e-01 | 4.1365e-03 |
| 0.392982 | 7.8584e-01 | 3.4374e-01 | 0.0000e+00 |
| 0.395060 | 7.6770e-01 | 3.4231e-01 | 6.1162e-03 |
| 0.397168 | 8.0916e-01 | 3.6279e-01 | 1.0395e-02 |
| 0.399182 | 7.7082e-01 | 3.6260e-01 | 4.0323e-03 |
| 0.401204 | 8.1108e-01 | 3.6057e-01 | 2.0243e-03 |
| 0.403199 | 7.3924e-01 | 3.7400e-01 | 0.0000e+00 |
| 0.405281 | 8.0199e-01 | 4.0598e-01 | 1.0163e-02 |
| 0.407407 | 7.4141e-01 | 3.4935e-01 | 4.0506e-03 |
| 0.409376 | 7.6441e-01 | 4.1445e-01 | 2.0502e-03 |
| 0.411424 | 7.4558e-01 | 3.8212e-01 | 0.0000e+00 |
| 0.413516 | 7.3090e-01 | 4.3729e-01 | 4.0900e-03 |
| 0.415447 | 7.6019e-01 | 3.9135e-01 | 4.1005e-03 |
| 0.417402 | 7.3124e-01 | 3.9552e-01 | 0.0000e+00 |
| 0.419376 | 7.8581e-01 | 4.1987e-01 | 4.1026e-03 |

|           |             |             |             |
|-----------|-------------|-------------|-------------|
| 0. 421408 | 7. 4084e-01 | 4. 4330e-01 | 4. 0201e-03 |
| 0. 423537 | 7. 4163e-01 | 3. 8467e-01 | 2. 0747e-03 |
| 0. 425436 | 7. 5109e-01 | 4. 1724e-01 | 2. 0243e-03 |
| 0. 427434 | 7. 3566e-01 | 4. 3205e-01 | 2. 0060e-03 |
| 0. 429476 | 7. 5031e-01 | 4. 6245e-01 | 0. 0000e+00 |
| 0. 431426 | 7. 3570e-01 | 4. 8279e-01 | 0. 0000e+00 |
| 0. 433404 | 8. 1517e-01 | 5. 0347e-01 | 2. 0222e-03 |
| 0. 435321 | 7. 3811e-01 | 4. 8486e-01 | 2. 0942e-03 |
| 0. 437228 | 7. 3941e-01 | 4. 4775e-01 | 0. 0000e+00 |
| 0. 439271 | 7. 8275e-01 | 4. 7005e-01 | 0. 0000e+00 |
| 0. 441292 | 7. 9475e-01 | 5. 1904e-01 | 2. 0192e-03 |
| 0. 443198 | 7. 2693e-01 | 5. 1414e-01 | 2. 0576e-03 |
| 0. 445155 | 7. 8379e-01 | 5. 0966e-01 | 2. 0040e-03 |
| 0. 447100 | 7. 0492e-01 | 4. 6421e-01 | 0. 0000e+00 |
| 0. 449004 | 6. 9673e-01 | 4. 5590e-01 | 6. 0852e-03 |
| 0. 450964 | 7. 4461e-01 | 5. 2162e-01 | 2. 0141e-03 |
| 0. 452858 | 7. 1299e-01 | 5. 3856e-01 | 2. 0534e-03 |
| 0. 454868 | 6. 9210e-01 | 5. 2129e-01 | 4. 0816e-03 |
| 0. 456782 | 7. 1817e-01 | 5. 6059e-01 | 4. 1152e-03 |
| 0. 458708 | 6. 7125e-01 | 5. 9437e-01 | 0. 0000e+00 |
| 0. 460640 | 7. 3364e-01 | 5. 8099e-01 | 0. 0000e+00 |
| 0. 462511 | 6. 8042e-01 | 5. 5581e-01 | 0. 0000e+00 |
| 0. 464387 | 6. 6243e-01 | 5. 7414e-01 | 2. 0367e-03 |
| 0. 466263 | 7. 3296e-01 | 6. 1236e-01 | 0. 0000e+00 |
| 0. 468142 | 7. 1335e-01 | 6. 3585e-01 | 2. 0212e-03 |

\$\$

<B><FONT COLOR=' #FF0000' ><!--SUMMARY\_BEGIN-->

TRANSLATIONAL NCS:

No translational NCS detected (with resolution limited to 4.00 Å)

The analysis uses the peak heights in the patterson map that are further than 14 Å (approx. 4 Ca-Ca) from the origin. The presence of a large off origin peak (above 20%) and/or a very low Q-score, below 1.0, is a string indicator of the presence of tNCS. An intermediate Q-score, between 5.0 and 1.0, may indicate weak tNCS or be the result of cross vector of a large scatterer such as a cluster or heavy metal.

Reference: P. Zwarts CCP4 Newsletter 42

<!--SUMMARY\_END--></FONT></B>

#### ANISOTROPY ANALYSIS:

Analysis using data from 2.96Å to 1.88Å.

Eigenvalues: 12.3025 10.4218 11.2434

Eigenvalue ratios: 1.0000 0.9535 0.9735

Little or no anisotropy detected.

The presence of anisotropy may indicate that the crystal is poorly ordered along one of the axes.

Anisotropic B scaling (orthogonal coords):

|  |           |           |           |  |
|--|-----------|-----------|-----------|--|
|  | 11.243387 | 0.000000  | 0.000000  |  |
|  | 0.000000  | 12.302508 | 0.000000  |  |
|  | 0.000000  | 0.000000  | 10.421767 |  |

Anisotropic U (orthogonal coords):

|  |          |          |          |  |
|--|----------|----------|----------|--|
|  | 0.284798 | 0.000000 | 0.000000 |  |
|  | 0.000000 | 0.311626 | 0.000000 |  |

| 0.000000 0.000000 0.263986 |

Eigenvector breakdown:

Eigenvalue Eigenvector (a\*,b\*,c\*)  
 0.311626 ( 0.000000 1.000000 0.000000 )  
 0.263986 ( 0.000000 0.000000 1.000000 )  
 0.284798 ( 1.000000 0.000000 0.000000 )

Anisotropic correction (orthogonal coords):

| -0.000924 -0.000000 0.000000 |  
 | -0.000000 0.012095 -0.000000 |  
 | 0.000000 -0.000000 -0.011171 |

\$TABLE: Intensity statistics:

\$GRAPHS: Mn(I) v resolution:N:1,2,3,4,5:

: Mn(I/sd) v resolution:N:1,6,7,8,9:

: No. reflections v resolution:N:1,10,11,12,13:

| 1/resol^2 | Mn(I(1)) | Mn(I(2)) | Mn(I(3)) | Mn(I)  | Mn(I/s(1)) | Mn(I/s(2)) | Mn(I/s(3)) | Mn(I/s) |
|-----------|----------|----------|----------|--------|------------|------------|------------|---------|
| N(1)      | N(2)     | N(3)     | N\$\$    |        |            |            |            |         |
| 0.0138    | 413.50   | 388.46   | 381.22   | 385.87 | 22.00      | 16.04      | 13.38      |         |
| 19.27     | 928.0    | 504.0    | 536.0    | 5424.0 |            |            |            |         |
| 0.0303    | 328.55   | 340.12   | 220.62   | 292.98 | 21.89      | 14.65      | 12.70      |         |
| 18.03     | 952.0    | 640.0    | 576.0    | 5888.0 |            |            |            |         |
| 0.0432    | 520.93   | 436.53   | 447.81   | 486.26 | 20.09      | 14.83      | 12.11      |         |
| 17.90     | 1024.0   | 560.0    | 608.0    | 5824.0 |            |            |            |         |
| 0.0546    | 417.03   | 550.43   | 377.00   | 506.26 | 20.81      | 15.24      | 13.12      |         |
| 18.00     | 960.0    | 648.0    | 520.0    | 5824.0 |            |            |            |         |
| 0.0648    | 491.78   | 479.46   | 366.18   | 483.37 | 19.92      | 16.75      | 13.78      |         |
| 18.21     | 984.0    | 584.0    | 536.0    | 5896.0 |            |            |            |         |
| 0.0744    | 377.48   | 440.40   | 281.07   | 414.47 | 19.32      | 15.32      | 12.97      |         |

|        |        |        |        |        |       |       |       |  |
|--------|--------|--------|--------|--------|-------|-------|-------|--|
| 17.15  | 1008.0 | 624.0  | 624.0  | 5992.0 |       |       |       |  |
| 0.0834 | 240.15 | 403.63 | 245.34 | 331.82 | 17.79 | 14.72 | 11.49 |  |
| 16.52  | 984.0  | 528.0  | 576.0  | 5920.0 |       |       |       |  |
| 0.0920 | 300.04 | 169.98 | 160.68 | 263.28 | 18.93 | 14.15 | 11.57 |  |
| 16.25  | 976.0  | 712.0  | 608.0  | 6296.0 |       |       |       |  |
| 0.1002 | 191.31 | 173.64 | 110.21 | 194.06 | 18.10 | 13.89 | 9.86  |  |
| 15.72  | 1000.0 | 680.0  | 768.0  | 6256.0 |       |       |       |  |
| 0.1081 | 132.48 | 181.07 | 138.68 | 169.81 | 16.73 | 14.13 | 9.69  |  |
| 15.18  | 1072.0 | 848.0  | 808.0  | 6800.0 |       |       |       |  |
| 0.1157 | 141.00 | 135.35 | 117.09 | 146.28 | 19.86 | 13.29 | 11.12 |  |
| 15.89  | 1088.0 | 864.0  | 888.0  | 7032.0 |       |       |       |  |
| 0.1231 | 136.51 | 169.05 | 114.39 | 148.92 | 19.76 | 14.64 | 10.84 |  |
| 16.04  | 1104.0 | 968.0  | 936.0  | 7240.0 |       |       |       |  |
| 0.1303 | 121.21 | 136.59 | 101.69 | 128.08 | 20.06 | 13.69 | 11.71 |  |
| 15.92  | 1104.0 | 936.0  | 928.0  | 7352.0 |       |       |       |  |
| 0.1373 | 112.73 | 125.78 | 111.40 | 120.08 | 20.81 | 14.15 | 10.85 |  |
| 16.00  | 1056.0 | 1000.0 | 1016.0 | 7344.0 |       |       |       |  |
| 0.1441 | 99.21  | 111.22 | 102.95 | 109.62 | 19.86 | 13.05 | 11.46 |  |
| 15.79  | 1120.0 | 984.0  | 1048.0 | 7704.0 |       |       |       |  |
| 0.1508 | 111.07 | 110.52 | 106.10 | 107.60 | 20.74 | 14.85 | 11.85 |  |
| 15.89  | 1064.0 | 1056.0 | 1024.0 | 7672.0 |       |       |       |  |
| 0.1573 | 79.19  | 92.72  | 107.86 | 95.19  | 19.29 | 13.34 | 11.28 |  |
| 15.48  | 1056.0 | 1064.0 | 1040.0 | 7976.0 |       |       |       |  |
| 0.1637 | 91.46  | 107.06 | 102.88 | 97.77  | 20.07 | 13.59 | 12.01 |  |
| 15.79  | 1184.0 | 1056.0 | 1064.0 | 7792.0 |       |       |       |  |
| 0.1700 | 91.94  | 116.38 | 88.84  | 97.47  | 19.30 | 13.89 | 11.27 |  |
| 15.67  | 1128.0 | 1096.0 | 1040.0 | 7936.0 |       |       |       |  |
| 0.1762 | 95.00  | 117.33 | 86.79  | 99.47  | 18.99 | 13.84 | 11.10 |  |
| 15.63  | 1024.0 | 1112.0 | 1016.0 | 7984.0 |       |       |       |  |
| 0.1823 | 92.87  | 88.66  | 80.27  | 88.04  | 18.90 | 13.80 | 11.62 |  |
| 15.51  | 1128.0 | 992.0  | 1160.0 | 7848.0 |       |       |       |  |
| 0.1883 | 60.15  | 93.48  | 83.94  | 80.07  | 18.51 | 13.53 | 10.62 |  |
| 15.36  | 1048.0 | 1088.0 | 1056.0 | 8008.0 |       |       |       |  |

|         |         |         |         |         |        |        |        |
|---------|---------|---------|---------|---------|--------|--------|--------|
| 0. 1942 | 72. 84  | 94. 13  | 79. 27  | 84. 25  | 19. 07 | 13. 41 | 10. 79 |
| 15. 58  | 1168. 0 | 1136. 0 | 1072. 0 | 8000. 0 |        |        |        |
| 0. 2000 | 55. 13  | 108. 96 | 83. 11  | 81. 51  | 17. 88 | 13. 86 | 11. 24 |
| 15. 41  | 1048. 0 | 1048. 0 | 1120. 0 | 8024. 0 |        |        |        |
| 0. 2058 | 52. 95  | 96. 77  | 81. 40  | 77. 99  | 18. 88 | 14. 35 | 12. 01 |
| 16. 08  | 1184. 0 | 1128. 0 | 1040. 0 | 8064. 0 |        |        |        |
| 0. 2114 | 50. 85  | 80. 08  | 73. 64  | 70. 39  | 18. 32 | 12. 92 | 11. 67 |
| 14. 97  | 1040. 0 | 1072. 0 | 1136. 0 | 8000. 0 |        |        |        |
| 0. 2170 | 56. 68  | 76. 34  | 65. 48  | 68. 36  | 16. 47 | 14. 04 | 11. 60 |
| 15. 17  | 1136. 0 | 1144. 0 | 1088. 0 | 8048. 0 |        |        |        |
| 0. 2224 | 44. 83  | 78. 34  | 62. 27  | 62. 83  | 16. 95 | 12. 84 | 11. 20 |
| 14. 59  | 1136. 0 | 1048. 0 | 1048. 0 | 8024. 0 |        |        |        |
| 0. 2279 | 37. 88  | 77. 38  | 59. 45  | 58. 65  | 16. 50 | 12. 86 | 10. 91 |
| 14. 35  | 1072. 0 | 1104. 0 | 1144. 0 | 8056. 0 |        |        |        |
| 0. 2333 | 38. 92  | 59. 73  | 47. 51  | 54. 73  | 15. 17 | 12. 91 | 10. 09 |
| 13. 99  | 1120. 0 | 1056. 0 | 1072. 0 | 8064. 0 |        |        |        |
| 0. 2386 | 38. 24  | 50. 41  | 57. 15  | 48. 13  | 15. 46 | 12. 12 | 10. 42 |
| 13. 57  | 1096. 0 | 1144. 0 | 1160. 0 | 8008. 0 |        |        |        |
| 0. 2439 | 32. 42  | 55. 00  | 53. 73  | 47. 87  | 15. 21 | 12. 96 | 9. 97  |
| 13. 60  | 1088. 0 | 1064. 0 | 1088. 0 | 8120. 0 |        |        |        |
| 0. 2491 | 32. 64  | 54. 09  | 49. 88  | 47. 08  | 14. 18 | 12. 86 | 10. 25 |
| 13. 20  | 1160. 0 | 1136. 0 | 1120. 0 | 8040. 0 |        |        |        |
| 0. 2543 | 27. 16  | 41. 95  | 40. 82  | 42. 11  | 13. 61 | 11. 46 | 8. 96  |
| 12. 81  | 1056. 0 | 1056. 0 | 1032. 0 | 8080. 0 |        |        |        |
| 0. 2593 | 31. 39  | 44. 61  | 38. 04  | 39. 31  | 14. 81 | 11. 46 | 9. 22  |
| 12. 53  | 1152. 0 | 1176. 0 | 1064. 0 | 8096. 0 |        |        |        |
| 0. 2645 | 32. 79  | 41. 29  | 33. 56  | 36. 77  | 14. 62 | 11. 27 | 8. 44  |
| 12. 11  | 1016. 0 | 1096. 0 | 1192. 0 | 8032. 0 |        |        |        |
| 0. 2694 | 30. 77  | 45. 94  | 31. 59  | 35. 86  | 14. 00 | 11. 92 | 8. 80  |
| 12. 25  | 1144. 0 | 1064. 0 | 1040. 0 | 8088. 0 |        |        |        |
| 0. 2745 | 26. 48  | 42. 18  | 30. 28  | 32. 54  | 12. 99 | 11. 42 | 8. 35  |
| 11. 30  | 1104. 0 | 1136. 0 | 1184. 0 | 8032. 0 |        |        |        |
| 0. 2793 | 25. 72  | 39. 95  | 24. 00  | 30. 34  | 12. 51 | 10. 54 | 7. 46  |

|         |         |         |         |         |        |       |       |  |
|---------|---------|---------|---------|---------|--------|-------|-------|--|
| 10. 82  | 1080. 0 | 1104. 0 | 1000. 0 | 8032. 0 |        |       |       |  |
| 0. 2842 | 20. 40  | 36. 85  | 23. 08  | 27. 38  | 10. 31 | 9. 46 | 6. 68 |  |
| 9. 69   | 1112. 0 | 1088. 0 | 1192. 0 | 8160. 0 |        |       |       |  |
| 0. 2891 | 14. 10  | 32. 03  | 23. 68  | 25. 10  | 8. 09  | 8. 31 | 6. 75 |  |
| 8. 98   | 1088. 0 | 1096. 0 | 1136. 0 | 7992. 0 |        |       |       |  |
| 0. 2939 | 16. 89  | 30. 03  | 23. 99  | 25. 58  | 8. 67  | 8. 42 | 6. 68 |  |
| 9. 38   | 1144. 0 | 976. 0  | 1040. 0 | 8024. 0 |        |       |       |  |
| 0. 2987 | 12. 85  | 24. 00  | 22. 23  | 21. 88  | 7. 55  | 7. 39 | 6. 32 |  |
| 8. 43   | 1136. 0 | 1160. 0 | 1128. 0 | 8048. 0 |        |       |       |  |
| 0. 3034 | 13. 38  | 23. 75  | 22. 73  | 22. 14  | 7. 63  | 7. 98 | 6. 18 |  |
| 8. 42   | 968. 0  | 1016. 0 | 1096. 0 | 7960. 0 |        |       |       |  |
| 0. 3080 | 14. 32  | 21. 96  | 20. 63  | 21. 04  | 8. 68  | 8. 51 | 5. 98 |  |
| 8. 57   | 1224. 0 | 952. 0  | 1128. 0 | 7976. 0 |        |       |       |  |
| 0. 3128 | 14. 20  | 23. 24  | 22. 10  | 21. 38  | 8. 21  | 8. 14 | 6. 17 |  |
| 8. 37   | 1080. 0 | 1104. 0 | 1064. 0 | 8064. 0 |        |       |       |  |
| 0. 3174 | 14. 14  | 18. 12  | 19. 87  | 19. 53  | 8. 01  | 7. 66 | 5. 42 |  |
| 7. 94   | 1016. 0 | 1120. 0 | 1168. 0 | 8056. 0 |        |       |       |  |
| 0. 3219 | 13. 16  | 19. 44  | 17. 12  | 17. 69  | 7. 75  | 7. 67 | 4. 64 |  |
| 7. 48   | 1240. 0 | 1104. 0 | 1024. 0 | 8096. 0 |        |       |       |  |
| 0. 3266 | 14. 72  | 17. 92  | 20. 82  | 17. 65  | 7. 71  | 6. 57 | 5. 01 |  |
| 7. 20   | 1040. 0 | 1048. 0 | 1080. 0 | 8064. 0 |        |       |       |  |
| 0. 3310 | 10. 65  | 17. 57  | 14. 43  | 15. 91  | 6. 83  | 7. 42 | 3. 98 |  |
| 6. 81   | 1040. 0 | 1128. 0 | 1232. 0 | 8064. 0 |        |       |       |  |
| 0. 3355 | 12. 44  | 21. 02  | 14. 71  | 16. 14  | 7. 29  | 8. 01 | 3. 75 |  |
| 7. 06   | 1208. 0 | 1096. 0 | 984. 0  | 8024. 0 |        |       |       |  |
| 0. 3401 | 9. 88   | 14. 79  | 16. 10  | 15. 65  | 6. 38  | 6. 84 | 4. 86 |  |
| 6. 88   | 1064. 0 | 1072. 0 | 1112. 0 | 8128. 0 |        |       |       |  |
| 0. 3445 | 9. 68   | 16. 33  | 15. 14  | 14. 61  | 6. 45  | 6. 62 | 4. 62 |  |
| 6. 55   | 1056. 0 | 1088. 0 | 1024. 0 | 7928. 0 |        |       |       |  |
| 0. 3488 | 8. 10   | 15. 67  | 15. 18  | 12. 95  | 5. 26  | 6. 84 | 4. 77 |  |
| 5. 92   | 1224. 0 | 1128. 0 | 1080. 0 | 8112. 0 |        |       |       |  |
| 0. 3533 | 9. 35   | 13. 67  | 13. 36  | 12. 98  | 6. 36  | 6. 28 | 4. 42 |  |
| 6. 10   | 1024. 0 | 1088. 0 | 1088. 0 | 8072. 0 |        |       |       |  |

|       |         |         |         |         |        |       |       |       |
|-------|---------|---------|---------|---------|--------|-------|-------|-------|
|       | 0. 3576 | 8. 17   | 16. 30  | 12. 31  | 12. 70 | 5. 64 | 7. 20 | 3. 84 |
| 5. 87 | 1152. 0 | 1048. 0 | 1096. 0 | 8144. 0 |        |       |       |       |
|       | 0. 3620 | 7. 44   | 13. 99  | 11. 43  | 11. 86 | 5. 06 | 6. 69 | 3. 83 |
| 5. 66 | 1056. 0 | 1128. 0 | 1136. 0 | 7952. 0 |        |       |       |       |
|       | 0. 3663 | 7. 30   | 12. 91  | 10. 31  | 11. 36 | 5. 69 | 6. 21 | 3. 62 |
| 5. 74 | 1120. 0 | 1160. 0 | 1048. 0 | 8128. 0 |        |       |       |       |
|       | 0. 3706 | 7. 29   | 12. 11  | 11. 37  | 11. 77 | 5. 22 | 5. 87 | 3. 90 |
| 5. 69 | 1152. 0 | 1024. 0 | 1120. 0 | 8064. 0 |        |       |       |       |
|       | 0. 3748 | 6. 14   | 13. 58  | 11. 19  | 10. 96 | 4. 36 | 6. 09 | 3. 84 |
| 5. 17 | 968. 0  | 1200. 0 | 1104. 0 | 8120. 0 |        |       |       |       |
|       | 0. 3791 | 6. 93   | 12. 53  | 11. 22  | 10. 04 | 5. 07 | 6. 01 | 3. 85 |
| 4. 98 | 1176. 0 | 1072. 0 | 1040. 0 | 7984. 0 |        |       |       |       |
|       | 0. 3833 | 7. 04   | 14. 16  | 11. 85  | 10. 40 | 4. 92 | 6. 59 | 4. 06 |
| 5. 04 | 1024. 0 | 1008. 0 | 1152. 0 | 8088. 0 |        |       |       |       |
|       | 0. 3875 | 5. 67   | 13. 47  | 8. 99   | 9. 40  | 4. 03 | 6. 12 | 3. 07 |
| 4. 69 | 1104. 0 | 1216. 0 | 1024. 0 | 8096. 0 |        |       |       |       |
|       | 0. 3916 | 6. 17   | 11. 56  | 8. 31   | 9. 21  | 4. 81 | 5. 59 | 3. 03 |
| 4. 61 | 1168. 0 | 1088. 0 | 1152. 0 | 8064. 0 |        |       |       |       |
|       | 0. 3958 | 5. 01   | 11. 31  | 7. 62   | 8. 82  | 3. 85 | 5. 35 | 2. 92 |
| 4. 54 | 1080. 0 | 1064. 0 | 1040. 0 | 8040. 0 |        |       |       |       |
|       | 0. 4000 | 6. 12   | 10. 88  | 8. 34   | 8. 46  | 3. 94 | 5. 50 | 3. 15 |
| 4. 33 | 1024. 0 | 1112. 0 | 1144. 0 | 8104. 0 |        |       |       |       |
|       | 0. 4040 | 4. 80   | 11. 77  | 8. 31   | 7. 82  | 3. 77 | 5. 63 | 3. 08 |
| 4. 08 | 1160. 0 | 1064. 0 | 1064. 0 | 7992. 0 |        |       |       |       |
|       | 0. 4081 | 4. 98   | 9. 14   | 9. 13   | 7. 71  | 3. 48 | 4. 63 | 3. 29 |
| 3. 94 | 1136. 0 | 1144. 0 | 1104. 0 | 8144. 0 |        |       |       |       |
|       | 0. 4123 | 5. 07   | 9. 22   | 7. 92   | 7. 13  | 3. 79 | 4. 40 | 2. 94 |
| 3. 68 | 984. 0  | 1120. 0 | 1096. 0 | 8128. 0 |        |       |       |       |
|       | 0. 4163 | 5. 39   | 9. 23   | 7. 81   | 7. 42  | 4. 02 | 4. 77 | 2. 92 |
| 3. 92 | 1144. 0 | 1104. 0 | 1064. 0 | 8024. 0 |        |       |       |       |
|       | 0. 4202 | 4. 57   | 9. 76   | 5. 87   | 6. 83  | 3. 27 | 4. 77 | 2. 29 |
| 3. 60 | 1128. 0 | 1080. 0 | 1144. 0 | 8056. 0 |        |       |       |       |
|       | 0. 4243 | 4. 98   | 9. 23   | 6. 52   | 7. 18  | 3. 33 | 4. 63 | 2. 60 |

|       |         |         |         |         |       |       |       |       |
|-------|---------|---------|---------|---------|-------|-------|-------|-------|
| 3. 72 | 1088. 0 | 1136. 0 | 1072. 0 | 8104. 0 |       |       |       |       |
|       | 0. 4283 | 3. 84   | 9. 95   | 7. 28   | 6. 49 | 3. 12 | 4. 99 | 2. 74 |
| 3. 45 | 1048. 0 | 1056. 0 | 1056. 0 | 8048. 0 |       |       |       |       |
|       | 0. 4323 | 4. 66   | 8. 02   | 6. 18   | 6. 04 | 3. 37 | 4. 15 | 2. 43 |
| 3. 28 | 1160. 0 | 1128. 0 | 1032. 0 | 8056. 0 |       |       |       |       |
|       | 0. 4361 | 4. 59   | 9. 05   | 6. 75   | 6. 24 | 3. 19 | 4. 23 | 2. 53 |
| 3. 26 | 1072. 0 | 1048. 0 | 1168. 0 | 8040. 0 |       |       |       |       |
|       | 0. 4402 | 4. 25   | 8. 58   | 6. 46   | 6. 24 | 2. 81 | 4. 34 | 2. 42 |
| 3. 27 | 1120. 0 | 1192. 0 | 1184. 0 | 8144. 0 |       |       |       |       |
|       | 0. 4441 | 3. 67   | 6. 51   | 6. 05   | 5. 63 | 2. 84 | 3. 55 | 2. 26 |
| 2. 99 | 1088. 0 | 968. 0  | 1000. 0 | 8056. 0 |       |       |       |       |
|       | 0. 4480 | 4. 08   | 8. 73   | 5. 56   | 6. 01 | 3. 01 | 4. 21 | 2. 19 |
| 3. 10 | 1104. 0 | 1192. 0 | 1040. 0 | 8080. 0 |       |       |       |       |
|       | 0. 4518 | 3. 62   | 8. 52   | 5. 17   | 5. 37 | 2. 51 | 4. 08 | 2. 00 |
| 2. 78 | 1120. 0 | 1032. 0 | 1224. 0 | 8072. 0 |       |       |       |       |
|       | 0. 4558 | 3. 12   | 6. 86   | 4. 77   | 5. 10 | 2. 29 | 3. 49 | 1. 87 |
| 2. 68 | 1152. 0 | 1144. 0 | 1040. 0 | 8032. 0 |       |       |       |       |
|       | 0. 4596 | 3. 00   | 6. 18   | 4. 11   | 4. 67 | 2. 25 | 3. 23 | 1. 69 |
| 2. 53 | 1048. 0 | 1048. 0 | 1064. 0 | 8104. 0 |       |       |       |       |
|       | 0. 4634 | 2. 89   | 5. 84   | 3. 83   | 4. 64 | 2. 12 | 2. 99 | 1. 57 |
| 2. 45 | 1040. 0 | 1232. 0 | 1072. 0 | 8080. 0 |       |       |       |       |
|       | 0. 4672 | 3. 17   | 6. 07   | 4. 94   | 4. 60 | 2. 18 | 3. 12 | 1. 90 |
| 2. 44 | 1120. 0 | 968. 0  | 1200. 0 | 8088. 0 |       |       |       |       |
| \$\$  |         |         |         |         |       |       |       |       |

The directional plots are along the directions of the moments of the anisotropy temperature matrix. These are ordered such that direction 1 has maximum alignment with  $a^*$ , directions 2 with  $b^*$ , etc.

#### TWINNING ANALYSIS:

Global twinning statistics.

These tests rely on the fact that it is highly improbable that very weak or very strong reflections will coincide, therefore, the tails for the distribution of twinned datasets will be less pronounced

Data truncated to 2.96 – 1.88 Å resolution

\$TABLE: Cumulative intensity distribution:

\$GRAPHS: Cumulative intensity distribution (Acentric and centric):N:1, 2, 3, 4, 5, 6:

\$\$ Z Acent\_theor Acent\_twin Acent\_obser Cent\_theor Cent\_obser \$\$

\$\$

|         |         |         |         |         |         |
|---------|---------|---------|---------|---------|---------|
| 0.00000 | 0.00000 | 0.00000 | 0.02637 | 0.00000 | 0.08274 |
| 0.04000 | 0.03921 | 0.00303 | 0.05218 | 0.15852 | 0.17199 |
| 0.08000 | 0.07688 | 0.01151 | 0.08410 | 0.22270 | 0.23425 |
| 0.12000 | 0.11308 | 0.02458 | 0.11525 | 0.27097 | 0.28451 |
| 0.16000 | 0.14786 | 0.04148 | 0.14752 | 0.31084 | 0.32466 |
| 0.20000 | 0.18127 | 0.06155 | 0.17962 | 0.34528 | 0.36248 |
| 0.24000 | 0.21337 | 0.08420 | 0.21016 | 0.37579 | 0.39293 |
| 0.28000 | 0.24422 | 0.10891 | 0.24035 | 0.40330 | 0.42159 |
| 0.32000 | 0.27385 | 0.13524 | 0.26990 | 0.42839 | 0.44896 |
| 0.36000 | 0.30232 | 0.16279 | 0.29855 | 0.45149 | 0.47498 |
| 0.40000 | 0.32968 | 0.19121 | 0.32508 | 0.47291 | 0.49980 |
| 0.44000 | 0.35596 | 0.22021 | 0.35160 | 0.49288 | 0.51599 |
| 0.48000 | 0.38122 | 0.24953 | 0.37682 | 0.51158 | 0.53314 |
| 0.52000 | 0.40548 | 0.27895 | 0.40203 | 0.52916 | 0.55042 |
| 0.56000 | 0.42879 | 0.30829 | 0.42576 | 0.54574 | 0.56503 |
| 0.60000 | 0.45119 | 0.33737 | 0.44837 | 0.56142 | 0.57890 |
| 0.64000 | 0.47271 | 0.36607 | 0.47095 | 0.57629 | 0.59228 |
| 0.68000 | 0.49338 | 0.39428 | 0.49184 | 0.59041 | 0.60601 |
| 0.72000 | 0.51325 | 0.42190 | 0.51194 | 0.60386 | 0.62254 |
| 0.76000 | 0.53233 | 0.44885 | 0.53131 | 0.61667 | 0.63654 |
| 0.80000 | 0.55067 | 0.47507 | 0.54988 | 0.62891 | 0.65003 |
| 0.84000 | 0.56829 | 0.50052 | 0.56758 | 0.64060 | 0.66103 |
| 0.88000 | 0.58522 | 0.52516 | 0.58520 | 0.65180 | 0.67222 |

|         |         |         |         |         |         |
|---------|---------|---------|---------|---------|---------|
| 0.92000 | 0.60148 | 0.54896 | 0.60204 | 0.66253 | 0.68024 |
| 0.96000 | 0.61711 | 0.57191 | 0.61716 | 0.67281 | 0.68869 |
| 1.00000 | 0.63212 | 0.59399 | 0.63204 | 0.68269 | 0.69894 |
| 1.04000 | 0.64655 | 0.61521 | 0.64681 | 0.69218 | 0.71372 |
| 1.08000 | 0.66040 | 0.63557 | 0.66017 | 0.70130 | 0.72441 |
| 1.12000 | 0.67372 | 0.65507 | 0.67372 | 0.71008 | 0.73631 |
| 1.16000 | 0.68651 | 0.67373 | 0.68650 | 0.71853 | 0.74319 |
| 1.20000 | 0.69881 | 0.69156 | 0.69924 | 0.72668 | 0.74900 |
| 1.24000 | 0.71062 | 0.70857 | 0.71141 | 0.73453 | 0.75509 |
| 1.28000 | 0.72196 | 0.72480 | 0.72232 | 0.74210 | 0.76375 |
| 1.32000 | 0.73286 | 0.74025 | 0.73269 | 0.74941 | 0.77008 |
| 1.36000 | 0.74334 | 0.75495 | 0.74343 | 0.75646 | 0.77400 |
| 1.40000 | 0.75340 | 0.76892 | 0.75365 | 0.76328 | 0.78020 |
| 1.44000 | 0.76307 | 0.78220 | 0.76302 | 0.76986 | 0.78788 |
| 1.48000 | 0.77236 | 0.79480 | 0.77210 | 0.77623 | 0.79417 |
| 1.52000 | 0.78129 | 0.80675 | 0.78086 | 0.78238 | 0.79951 |
| 1.56000 | 0.78986 | 0.81807 | 0.78962 | 0.78833 | 0.80486 |
| 1.60000 | 0.79810 | 0.82880 | 0.79789 | 0.79410 | 0.80896 |
| 1.64000 | 0.80602 | 0.83895 | 0.80557 | 0.79967 | 0.81418 |
| 1.68000 | 0.81363 | 0.84855 | 0.81291 | 0.80508 | 0.81995 |
| 1.72000 | 0.82093 | 0.85763 | 0.81972 | 0.81031 | 0.82588 |
| 1.76000 | 0.82796 | 0.86621 | 0.82674 | 0.81538 | 0.82944 |
| 1.80000 | 0.83470 | 0.87431 | 0.83355 | 0.82029 | 0.83526 |
| 1.84000 | 0.84118 | 0.88196 | 0.83990 | 0.82505 | 0.83947 |
| 1.88000 | 0.84741 | 0.88917 | 0.84606 | 0.82967 | 0.84436 |
| 1.92000 | 0.85339 | 0.89597 | 0.85205 | 0.83414 | 0.84814 |
| 1.96000 | 0.85914 | 0.90238 | 0.85749 | 0.83849 | 0.85169 |
| 2.00000 | 0.86466 | 0.90842 | 0.86287 | 0.84270 | 0.85569 |

\$\$

The culmulative intensity,  $N(Z)$ , plot is diagnostic for both twinning and tNCS. For twinned data there are fewer weak reflections, therefore,  $N(Z)$  is sigmoidal for twinned

data. However, if both twinning and tNCS are present, the effects may cancel each out. Therefore the results of the L-test and patterson test should be consulted

L test for twinning: (Padilla and Yeates Acta Cryst. D59 1124 (2003))

L statistic = 0.481 (untwinned 0.5 perfect twin 0.375)

Data has used to 2.96 – 1.88 Å resolution

Relation between L statistics and twinning fraction:

Twinning fraction = 0.000 L statistics = 0.500:

Twinning fraction = 0.100 L statistics = 0.440:

Twinning fraction = 0.500 L statistics = 0.375:

\$TABLE: L test for twinning:

\$GRAPHS: cumulative distribution function for |L|, twin fraction of  
0.05:0|1x0|1:1, 2, 3, 4:

\$\$ |L| N(L) Untwinned Twinned \$\$

\$\$

|        |        |        |        |
|--------|--------|--------|--------|
| 0.0000 | 0.0000 | 0.0000 | 0.0000 |
| 0.0500 | 0.0533 | 0.0500 | 0.0749 |
| 0.1000 | 0.1061 | 0.1000 | 0.1495 |
| 0.1500 | 0.1592 | 0.1500 | 0.2233 |
| 0.2000 | 0.2128 | 0.2000 | 0.2960 |
| 0.2500 | 0.2659 | 0.2500 | 0.3672 |
| 0.3000 | 0.3199 | 0.3000 | 0.4365 |
| 0.3500 | 0.3718 | 0.3500 | 0.5036 |
| 0.4000 | 0.4237 | 0.4000 | 0.5680 |
| 0.4500 | 0.4756 | 0.4500 | 0.6294 |
| 0.5000 | 0.5260 | 0.5000 | 0.6875 |
| 0.5500 | 0.5769 | 0.5500 | 0.7418 |
| 0.6000 | 0.6274 | 0.6000 | 0.7920 |
| 0.6500 | 0.6769 | 0.6500 | 0.8377 |

|        |        |        |        |
|--------|--------|--------|--------|
| 0.7000 | 0.7265 | 0.7000 | 0.8785 |
| 0.7500 | 0.7758 | 0.7500 | 0.9141 |
| 0.8000 | 0.8236 | 0.8000 | 0.9440 |
| 0.8500 | 0.8710 | 0.8500 | 0.9679 |
| 0.9000 | 0.9169 | 0.9000 | 0.9855 |
| 0.9500 | 0.9612 | 0.9500 | 0.9963 |
| 1.0000 | 1.0000 | 1.0000 | 1.0000 |

\$\$

The Cumulative  $|L|$  plot for acentric data, where  $L = (I_1 - I_2) / (I_1 + I_2)$ . This depends on the local difference in intensities. The difference operators used link to the neighbouring reflections taking into account possible tNCS operators.

Note that this estimate is not as reliable as obtained via the H-test or ML Britton test if twin laws are available. However, it is less prone to the effects of anisotropy than the H-test

Reference: Padilla, Yeates. A statistic for local intensity differences: robustness to anisotropy and pseudo-centering and utility for detecting twinning. Acta Cryst. D59, 1124-30, 2003.

Mean acentric moments  $I$  from input data:

$\langle I^2 \rangle / \langle I \rangle^2 = 1.988$  (Expected = 2.000, Perfect Twin = 1.500)  
 $\langle I^3 \rangle / \langle I \rangle^3 = 5.981$  (Expected value = 6.000, Perfect Twin = 3.000)  
 $\langle I^4 \rangle / \langle I \rangle^4 = 24.431$  (Expected value = 24.000, Perfect Twin = 7.500)

\$TABLE: Acentric Moments of  $I$ :

\$GRAPHS: 2nd moment of  $I$  1.988 (Expected value = 2, Perfect Twin = 1.5):0|0.468x0|5:1,2:  
 : 3rd & 4th Moments of  $I$  (Expected values = 6, 24, Perfect twin = 3,  
 7.5):0|0.468x0|36:1,3,4:

\$\$ 1/resol^2     $\langle I^{**2} \rangle$      $\langle I^{**3} \rangle$      $\langle I^{**4} \rangle$  \$\$

\$\$

|           |        |        |         |
|-----------|--------|--------|---------|
| 0. 013489 | 2. 155 | 6. 847 | 27. 657 |
| 0. 027445 | 2. 072 | 5. 982 | 20. 454 |
| 0. 038027 | 2. 067 | 6. 213 | 23. 558 |
| 0. 047352 | 2. 007 | 6. 371 | 27. 626 |
| 0. 055737 | 1. 886 | 5. 014 | 16. 996 |
| 0. 063445 | 2. 031 | 6. 032 | 22. 744 |
| 0. 070485 | 2. 030 | 5. 964 | 21. 955 |
| 0. 077273 | 2. 128 | 6. 637 | 25. 866 |
| 0. 083937 | 2. 144 | 7. 329 | 34. 919 |
| 0. 090028 | 2. 083 | 6. 281 | 23. 684 |
| 0. 095814 | 2. 097 | 6. 408 | 24. 545 |
| 0. 101358 | 2. 237 | 7. 782 | 35. 467 |
| 0. 106696 | 2. 034 | 5. 998 | 22. 089 |
| 0. 111534 | 2. 146 | 7. 191 | 32. 948 |
| 0. 116296 | 2. 188 | 8. 311 | 47. 050 |
| 0. 120786 | 2. 166 | 7. 372 | 33. 477 |
| 0. 125154 | 1. 991 | 5. 952 | 23. 198 |
| 0. 129395 | 2. 160 | 8. 424 | 53. 377 |
| 0. 133514 | 1. 991 | 5. 744 | 20. 608 |
| 0. 137630 | 2. 023 | 6. 500 | 28. 401 |
| 0. 141548 | 1. 805 | 4. 557 | 14. 381 |
| 0. 145367 | 2. 075 | 6. 830 | 30. 565 |
| 0. 149124 | 1. 980 | 5. 809 | 21. 536 |
| 0. 152748 | 1. 929 | 5. 480 | 20. 110 |
| 0. 156417 | 1. 875 | 5. 102 | 18. 359 |
| 0. 159836 | 2. 148 | 7. 287 | 33. 254 |
| 0. 163346 | 1. 952 | 5. 418 | 18. 488 |
| 0. 166880 | 1. 837 | 4. 602 | 13. 821 |
| 0. 170214 | 1. 947 | 5. 565 | 20. 280 |
| 0. 173630 | 1. 859 | 4. 741 | 14. 642 |
| 0. 177005 | 1. 982 | 5. 800 | 21. 766 |
| 0. 180233 | 2. 019 | 5. 975 | 22. 641 |

|           |        |        |         |
|-----------|--------|--------|---------|
| 0. 183497 | 1. 927 | 5. 737 | 24. 354 |
| 0. 186813 | 1. 984 | 6. 015 | 24. 070 |
| 0. 189918 | 2. 175 | 7. 257 | 32. 325 |
| 0. 193045 | 1. 967 | 5. 518 | 19. 148 |
| 0. 196289 | 1. 871 | 5. 019 | 16. 882 |
| 0. 199368 | 1. 977 | 5. 979 | 25. 277 |
| 0. 202408 | 1. 994 | 5. 886 | 22. 470 |
| 0. 205515 | 1. 854 | 5. 251 | 21. 119 |
| 0. 208552 | 1. 974 | 5. 728 | 21. 339 |
| 0. 211490 | 1. 992 | 6. 117 | 25. 404 |
| 0. 214469 | 2. 026 | 6. 104 | 23. 475 |
| 0. 217572 | 2. 160 | 8. 883 | 61. 263 |
| 0. 220413 | 1. 992 | 5. 975 | 23. 543 |
| 0. 223269 | 1. 966 | 5. 629 | 20. 581 |
| 0. 226221 | 1. 995 | 6. 097 | 25. 942 |
| 0. 229194 | 1. 971 | 5. 741 | 22. 183 |
| 0. 231961 | 2. 095 | 7. 457 | 42. 153 |
| 0. 234729 | 1. 984 | 5. 750 | 21. 142 |
| 0. 237621 | 2. 120 | 7. 382 | 36. 815 |
| 0. 240483 | 1. 844 | 4. 760 | 15. 153 |
| 0. 243193 | 1. 967 | 5. 703 | 21. 270 |
| 0. 245907 | 1. 966 | 5. 654 | 20. 360 |
| 0. 248671 | 1. 942 | 5. 369 | 18. 327 |
| 0. 251531 | 2. 129 | 6. 889 | 29. 601 |
| 0. 254241 | 1. 903 | 5. 161 | 17. 838 |
| 0. 256836 | 1. 973 | 5. 783 | 22. 217 |
| 0. 259561 | 1. 867 | 4. 939 | 16. 191 |
| 0. 262268 | 1. 994 | 5. 845 | 21. 791 |
| 0. 264962 | 2. 089 | 6. 495 | 25. 469 |
| 0. 267585 | 1. 902 | 5. 057 | 16. 426 |
| 0. 270213 | 1. 894 | 5. 240 | 18. 659 |
| 0. 272849 | 1. 946 | 5. 369 | 18. 457 |
| 0. 275521 | 1. 966 | 5. 603 | 20. 287 |

|           |        |        |         |
|-----------|--------|--------|---------|
| 0. 278027 | 2. 030 | 6. 159 | 24. 199 |
| 0. 280591 | 1. 910 | 5. 435 | 20. 375 |
| 0. 283176 | 2. 025 | 6. 378 | 26. 361 |
| 0. 285788 | 2. 231 | 8. 402 | 46. 683 |
| 0. 288410 | 2. 137 | 7. 203 | 33. 267 |
| 0. 290837 | 1. 986 | 5. 841 | 22. 095 |
| 0. 293376 | 1. 986 | 5. 712 | 20. 745 |
| 0. 295945 | 1. 964 | 5. 552 | 19. 657 |
| 0. 298455 | 2. 049 | 6. 209 | 24. 341 |
| 0. 301022 | 2. 177 | 7. 538 | 35. 961 |
| 0. 303500 | 2. 205 | 7. 429 | 32. 250 |
| 0. 305960 | 2. 040 | 6. 364 | 27. 785 |
| 0. 308440 | 2. 115 | 6. 941 | 30. 620 |
| 0. 310909 | 2. 045 | 6. 311 | 27. 196 |
| 0. 313412 | 2. 003 | 6. 112 | 24. 879 |
| 0. 315848 | 1. 949 | 5. 569 | 20. 852 |
| 0. 318213 | 1. 964 | 5. 637 | 21. 430 |
| 0. 320599 | 1. 824 | 4. 666 | 15. 142 |
| 0. 322987 | 1. 961 | 5. 363 | 18. 019 |
| 0. 325411 | 1. 939 | 5. 615 | 21. 401 |
| 0. 327893 | 2. 156 | 8. 230 | 50. 501 |
| 0. 330179 | 1. 966 | 5. 686 | 21. 707 |
| 0. 332534 | 1. 911 | 5. 301 | 18. 639 |
| 0. 334845 | 1. 915 | 4. 972 | 15. 484 |
| 0. 337270 | 1. 928 | 5. 661 | 22. 298 |
| 0. 339637 | 1. 886 | 4. 990 | 16. 878 |
| 0. 341976 | 1. 911 | 5. 002 | 15. 921 |
| 0. 344277 | 2. 130 | 6. 832 | 28. 292 |
| 0. 346556 | 2. 028 | 6. 077 | 23. 712 |
| 0. 348922 | 2. 139 | 7. 100 | 30. 630 |
| 0. 351247 | 2. 141 | 7. 201 | 31. 907 |
| 0. 353648 | 2. 081 | 6. 230 | 22. 947 |
| 0. 355909 | 2. 071 | 6. 524 | 27. 140 |

|           |        |         |         |
|-----------|--------|---------|---------|
| 0. 358028 | 2. 039 | 6. 233  | 24. 312 |
| 0. 360344 | 2. 099 | 6. 610  | 26. 673 |
| 0. 362588 | 2. 151 | 7. 106  | 29. 971 |
| 0. 364892 | 2. 155 | 7. 055  | 29. 755 |
| 0. 367219 | 1. 877 | 4. 979  | 16. 847 |
| 0. 369484 | 1. 880 | 4. 883  | 15. 878 |
| 0. 371638 | 2. 033 | 5. 962  | 21. 433 |
| 0. 373752 | 2. 058 | 6. 352  | 26. 185 |
| 0. 376095 | 2. 142 | 6. 966  | 29. 513 |
| 0. 378315 | 2. 021 | 6. 160  | 24. 306 |
| 0. 380489 | 2. 062 | 6. 155  | 22. 961 |
| 0. 382796 | 2. 143 | 6. 696  | 25. 502 |
| 0. 384980 | 1. 987 | 6. 143  | 25. 767 |
| 0. 387094 | 2. 109 | 6. 366  | 23. 967 |
| 0. 389217 | 2. 137 | 7. 231  | 32. 883 |
| 0. 391425 | 2. 175 | 7. 821  | 40. 323 |
| 0. 393624 | 2. 038 | 6. 161  | 23. 924 |
| 0. 395837 | 1. 969 | 5. 395  | 18. 127 |
| 0. 398046 | 2. 053 | 6. 237  | 23. 808 |
| 0. 400114 | 1. 982 | 5. 581  | 19. 592 |
| 0. 402244 | 1. 958 | 5. 670  | 21. 125 |
| 0. 404347 | 1. 983 | 5. 673  | 19. 951 |
| 0. 406582 | 1. 978 | 5. 625  | 20. 018 |
| 0. 408657 | 2. 379 | 10. 049 | 63. 771 |
| 0. 410802 | 2. 017 | 5. 828  | 21. 063 |
| 0. 412984 | 2. 046 | 6. 279  | 24. 735 |
| 0. 415096 | 1. 930 | 5. 330  | 18. 965 |
| 0. 417101 | 1. 958 | 5. 451  | 18. 906 |
| 0. 419170 | 2. 021 | 5. 892  | 21. 306 |
| 0. 421290 | 2. 056 | 6. 071  | 22. 790 |
| 0. 423510 | 2. 045 | 6. 258  | 24. 680 |
| 0. 425506 | 2. 075 | 6. 304  | 24. 103 |
| 0. 427606 | 1. 977 | 5. 490  | 19. 420 |

|          |       |       |        |
|----------|-------|-------|--------|
| 0.429712 | 2.014 | 5.766 | 21.429 |
| 0.431733 | 2.052 | 6.314 | 26.007 |
| 0.433797 | 1.772 | 4.177 | 12.004 |
| 0.435823 | 1.999 | 6.008 | 25.313 |
| 0.437908 | 2.131 | 7.561 | 39.863 |
| 0.440026 | 1.979 | 6.102 | 27.584 |
| 0.442076 | 2.136 | 6.625 | 25.181 |
| 0.444084 | 1.889 | 5.188 | 19.119 |
| 0.446135 | 2.045 | 6.099 | 23.442 |
| 0.448082 | 2.168 | 7.317 | 32.467 |
| 0.450130 | 2.182 | 6.756 | 25.184 |
| 0.452088 | 2.114 | 6.565 | 26.060 |
| 0.454222 | 2.236 | 8.227 | 41.891 |
| 0.456262 | 2.077 | 6.389 | 26.692 |
| 0.458274 | 2.012 | 5.763 | 21.517 |
| 0.460287 | 2.113 | 6.881 | 29.931 |
| 0.462257 | 2.014 | 5.880 | 22.726 |
| 0.464226 | 2.078 | 6.004 | 21.359 |
| 0.466172 | 2.160 | 6.968 | 29.566 |
| 0.468103 | 1.886 | 4.628 | 13.630 |

\$\$

\$TABLE: Centric Moments of I:

\$GRAPHS: 2nd moment of I 3.494 (Expected = 3, Perfect Twin = 2):0|0.460x0|5:1,2:

: 3rd & 4th Moments of I (Expected = 15, 105, Perfect Twin = 6, 24):0|0.460x0|150:1,3,4:

\$\$ 1/resol^2 <I\*\*2> <I\*\*3> <I\*\*4> \$\$

\$\$

|          |       |        |          |
|----------|-------|--------|----------|
| 0.019665 | 3.707 | 19.855 | 125.019  |
| 0.054334 | 3.346 | 16.121 | 93.634   |
| 0.087620 | 4.420 | 32.226 | 288.130  |
| 0.115776 | 6.122 | 94.369 | 2019.725 |
| 0.139341 | 3.255 | 20.090 | 167.206  |
| 0.160959 | 3.048 | 16.449 | 119.193  |

|          |       |        |         |
|----------|-------|--------|---------|
| 0.181104 | 3.641 | 27.465 | 306.830 |
| 0.200452 | 2.376 | 8.248  | 35.464  |
| 0.219245 | 3.307 | 20.638 | 191.013 |
| 0.237970 | 3.455 | 18.195 | 116.486 |
| 0.256476 | 2.852 | 11.802 | 57.642  |
| 0.274807 | 2.726 | 10.648 | 49.365  |
| 0.293279 | 2.620 | 9.755  | 44.206  |
| 0.312741 | 3.139 | 16.243 | 110.385 |
| 0.331194 | 2.412 | 8.170  | 33.106  |
| 0.349876 | 3.566 | 22.428 | 188.963 |
| 0.368338 | 3.013 | 15.545 | 112.350 |
| 0.386544 | 3.039 | 14.342 | 84.368  |
| 0.404845 | 2.639 | 9.590  | 43.938  |
| 0.423169 | 2.924 | 11.498 | 53.384  |
| 0.441506 | 3.156 | 16.483 | 126.210 |
| 0.459674 | 3.114 | 13.230 | 71.367  |

\$\$

First principles calculation has found 5 potential twinning operators

| # twinning operator | score | type |
|---------------------|-------|------|
| 0 -h, l, k          | 2.14  | pm   |
| 1 -k, -h, -l        | 3.13  | pm   |
| 2 k, l, h           | 4.49  | pm   |
| 3 -l, -h, k         | 4.69  | pm   |
| 4 -l, -k, -h        | 5.27  | pm   |

m merohedral

pm pseudo-merohedral

The score gives an indication of the closure of the twinning operation. The lower the values

the more higher the overlap.

The appearance of twinning operators only indicates that the crystal symmetry and lattice symmetry permit twinning. It does not mean that there is twinning present. Only the

presence of statistics consistent with twinning gives a strong indicator.

Twinning operator based tests:

H-test: Cumulative plot of  $H=|I-T(I)|/(I-T(I))$  for twin related reflections. This should be linear with slope  $1/(1-2a)$ .

\$TABLE: H test for twinning

\$GRAPHS: cumulative distribution function for |H| (operator -h, l, k) alpha = 0.01:0|1x0|1:1, 2, 3, 4, 5, 6, 7:

: cumulative distribution function for |H| (operator -k, -h, -l) alpha = 0.02:0|1x0|1:1, 2, 3, 4, 5, 6, 8:

: cumulative distribution function for |H| (operator k, l, h) alpha = 0.00:0|1x0|1:1, 2, 3, 4, 5, 6, 9:

: cumulative distribution function for |H| (operator -l, -h, k) alpha = 0.00:0|1x0|1:1, 2, 3, 4, 5, 6, 10:

: cumulative distribution function for |H| (operator -l, -k, -h) alpha = 0.01:0|1x0|1:1, 2, 3, 4, 5, 6, 11:

\$\$ |H| 0.4 0.3 0.2 0.1 0.0 -h, l, k -k, -h, -l k, l, h -l, -h, k -l, -k, -h\$\$

\$\$

0.00 0.0 0.0 0.0 0.0 0.0 0.0 0.00 0.00 0.00 0.00 0.00

0.05 - - - - - 0.07 0.07 0.05 0.05 0.07

0.10 - - - - - 0.12 0.12 0.10 0.10 0.12

0.15 - - - - - 0.16 0.17 0.15 0.15 0.17

0.20 - - - - - 0.21 0.22 0.20 0.20 0.21

0.25 - - - - - 0.26 0.27 0.25 0.25 0.27

0.30 - - - - - 0.32 0.32 0.30 0.30 0.32

0.35 - - - - - 0.37 0.37 0.36 0.36 0.36

0.40 - - - - - 0.42 0.42 0.40 0.40 0.41

0.45 - - - - - 0.47 0.47 0.45 0.45 0.46

0.50 - - - - - 0.52 0.52 0.51 0.51 0.51

0.55 - - - - - 0.57 0.57 0.56 0.56 0.56

|      |     |     |      |      |     |      |      |      |      |      |
|------|-----|-----|------|------|-----|------|------|------|------|------|
| 0.60 | -   | -   | -    | -    | -   | 0.62 | 0.62 | 0.61 | 0.61 | 0.61 |
| 0.65 | -   | -   | -    | -    | -   | 0.67 | 0.67 | 0.65 | 0.65 | 0.66 |
| 0.70 | -   | -   | -    | -    | -   | 0.72 | 0.73 | 0.71 | 0.71 | 0.71 |
| 0.75 | -   | -   | -    | -    | -   | 0.77 | 0.78 | 0.76 | 0.76 | 0.76 |
| 0.80 | -   | -   | -    | -    | -   | 0.81 | 0.82 | 0.81 | 0.81 | 0.81 |
| 0.85 | -   | -   | -    | -    | -   | 0.86 | 0.87 | 0.86 | 0.86 | 0.86 |
| 0.90 | -   | -   | -    | -    | -   | 0.91 | 0.92 | 0.91 | 0.91 | 0.91 |
| 0.95 | -   | -   | -    | -    | -   | 0.96 | 0.96 | 0.96 | 0.96 | 0.96 |
| 1.00 | 5.0 | 2.5 | 1.67 | 1.25 | 1.0 | 1.00 | 1.00 | 1.00 | 1.00 | 1.00 |

\$\$

Britton plot: Plot of number of negative detwinned intensities.

\$TABLE: Britton plot for twinning

\$GRAPHS:  $aI_1 + (1-a)I_2 > 0$  (operator -h, l, k) alpha = 0.00:A:1,2:

:  $aI_1 + (1-a)I_2 > 0$  (operator -k, -h, -l) alpha = 0.00:A:1,3:

:  $aI_1 + (1-a)I_2 > 0$  (operator k, l, h) alpha = 0.00:A:1,4:

:  $aI_1 + (1-a)I_2 > 0$  (operator -l, -h, k) alpha = 0.00:A:1,5:

:  $aI_1 + (1-a)I_2 > 0$  (operator -l, -k, -h) alpha = 0.00:A:1,6:

\$\$ alpha -h, l, k -k, -h, -l k, l, h -l, -h, k -l, -k, -h\$\$

\$\$

|      |      |      |      |      |      |
|------|------|------|------|------|------|
| 0.00 | 0.00 | 0.00 | 0.00 | 0.00 | 0.00 |
| 0.03 | 0.02 | 0.02 | 0.02 | 0.02 | 0.02 |
| 0.05 | 0.05 | 0.05 | 0.04 | 0.05 | 0.04 |
| 0.07 | 0.07 | 0.07 | 0.07 | 0.07 | 0.07 |
| 0.10 | 0.09 | 0.09 | 0.09 | 0.10 | 0.09 |
| 0.12 | 0.12 | 0.11 | 0.12 | 0.12 | 0.12 |
| 0.15 | 0.14 | 0.14 | 0.14 | 0.15 | 0.14 |
| 0.17 | 0.17 | 0.16 | 0.17 | 0.17 | 0.17 |
| 0.20 | 0.19 | 0.19 | 0.19 | 0.20 | 0.19 |
| 0.23 | 0.21 | 0.22 | 0.22 | 0.22 | 0.21 |
| 0.25 | 0.24 | 0.24 | 0.24 | 0.24 | 0.24 |

|      |      |      |      |      |      |
|------|------|------|------|------|------|
| 0.28 | 0.26 | 0.26 | 0.27 | 0.27 | 0.26 |
| 0.30 | 0.29 | 0.29 | 0.29 | 0.29 | 0.29 |
| 0.33 | 0.31 | 0.31 | 0.31 | 0.32 | 0.31 |
| 0.35 | 0.34 | 0.34 | 0.34 | 0.34 | 0.33 |
| 0.38 | 0.36 | 0.36 | 0.36 | 0.37 | 0.36 |
| 0.40 | 0.39 | 0.39 | 0.39 | 0.40 | 0.39 |
| 0.42 | 0.41 | 0.41 | 0.41 | 0.42 | 0.41 |
| 0.45 | 0.44 | 0.44 | 0.44 | 0.45 | 0.43 |
| 0.47 | 0.46 | 0.46 | 0.46 | 0.47 | 0.46 |

\$\$

ML-Britton: Plot of number of negative detwinned intensities. The ML element corrects for the sigma in the observed intensity and for the effects of a single tNCS operator, if it is present.

\$TABLE: ML-Britton test for twinning

\$GRAPHS:  $aI1+(1-a)I2 > 0$  (operator -h, l, k) alpha = 0.00:A:1,2:

:  $aI1+(1-a)I2 > 0$  (operator -k, -h, -l) alpha = 0.00:A:1,3:

:  $aI1+(1-a)I2 > 0$  (operator k, l, h) alpha = 0.00:A:1,4:

:  $aI1+(1-a)I2 > 0$  (operator -l, -h, k) alpha = 0.00:A:1,5:

:  $aI1+(1-a)I2 > 0$  (operator -l, -k, -h) alpha = 0.00:A:1,6:

\$\$ alpha -h, l, k -k, -h, -l k, l, h -l, -h, k -l, -k, -h\$\$

\$\$

|      |           |           |           |           |           |
|------|-----------|-----------|-----------|-----------|-----------|
| 0.00 | 0.18      | 0.18      | 0.18      | 0.18      | 0.18      |
| 0.03 | 5037.90   | 3816.69   | 5169.02   | 4382.12   | 4055.91   |
| 0.05 | 21427.26  | 18669.27  | 21913.15  | 20873.90  | 19977.19  |
| 0.07 | 46123.49  | 40792.34  | 48021.23  | 45932.19  | 46279.47  |
| 0.10 | 78882.31  | 69646.13  | 80285.70  | 76422.73  | 77175.56  |
| 0.12 | 112539.51 | 102350.75 | 117933.61 | 111211.84 | 113345.33 |
| 0.15 | 150881.01 | 138780.31 | 161503.38 | 149165.13 | 152585.69 |
| 0.17 | 191646.74 | 178571.44 | 206832.87 | 190733.90 | 196201.73 |
| 0.20 | 232824.72 | 219253.65 | 251640.85 | 233495.81 | 241992.61 |

|      |           |           |           |           |           |
|------|-----------|-----------|-----------|-----------|-----------|
| 0.23 | 278168.04 | 264728.95 | 300940.68 | 279630.13 | 289211.80 |
| 0.25 | 324734.15 | 311951.29 | 350303.29 | 328037.93 | 338837.65 |
| 0.28 | 373092.84 | 360312.54 | 402088.83 | 379271.93 | 390155.22 |
| 0.30 | 423850.94 | 411762.16 | 456049.39 | 430692.67 | 441350.34 |
| 0.33 | 475256.14 | 465233.30 | 510888.51 | 482852.33 | 496461.22 |
| 0.35 | 527806.72 | 518781.05 | 567956.57 | 538413.49 | 552720.40 |
| 0.38 | 583513.03 | 576299.23 | 626152.69 | 595243.67 | 610898.55 |
| 0.40 | 640938.82 | 630711.05 | 687545.41 | 651173.52 | 669412.79 |
| 0.42 | 698795.28 | 690066.82 | 749185.07 | 710920.46 | 730461.33 |
| 0.45 | 757797.62 | 749543.21 | 810848.85 | 770775.67 | 791230.90 |
| 0.47 | 812614.53 | 805379.20 | 869131.00 | 826124.30 | 848722.35 |

\$\$

Twin fraction estimates based on global statistics:

Twin fraction estimate from L-test: 0.05

Twin fraction estimate from moments: 0.01

Twin fraction estimates by twinning operator

The following operator based twinning estimates analyse data with each of the possible twin operators. If twinning is present the most likely operator will have a low RTwin score ( $I-T(I)$ / $I+T(I)$ ) and estimates of the twin fraction above 0.

|              | operator   | L-test | Rtwin | H-test | Britton | ML |
|--------------|------------|--------|-------|--------|---------|----|
| Britton      |            |        |       |        |         |    |
|              | -h, l, k   | No     | 0.48  | 0.01   | 0.00    |    |
| 0.00 ( N/A ) |            |        |       |        |         |    |
|              | -k, -h, -l | No     | 0.48  | 0.02   | 0.00    |    |
| 0.00 ( N/A ) |            |        |       |        |         |    |

|              |            |  |    |  |      |  |      |  |      |  |
|--------------|------------|--|----|--|------|--|------|--|------|--|
|              | k, l, h    |  | No |  | 0.50 |  | 0.00 |  | 0.00 |  |
| 0.00 ( N/A ) |            |  |    |  |      |  |      |  |      |  |
|              | -l, -h, k  |  | No |  | 0.50 |  | 0.00 |  | 0.00 |  |
| 0.00 ( N/A ) |            |  |    |  |      |  |      |  |      |  |
|              | -l, -k, -h |  | No |  | 0.49 |  | 0.01 |  | 0.00 |  |
| 0.00 ( N/A ) |            |  |    |  |      |  |      |  |      |  |

-----  
-----

## TWINNING SUMMARY

Twinning fraction from H-test: 0.02

Twinning fraction from L-Test: 0.05

No twinning or very low twinning fraction.

Twinning, if any, can be safely be ignored. However, twin refinement may be attempted, but not before the model is completely build.

## Analysis of mean intensity by parity for reflection classes

For each class,  $Mn(I/\sigma(I))$  is given for even and odd parity with respect to the condition,

eg group 1: h even & odd; group 7 h+k+l even & odd; group 8 h+k=2n & h+l=2n & k+l=2n or not

| Range | Min_S   | Dmax          | Nref | 1    | 2    | 3    | 4    | 5    |
|-------|---------|---------------|------|------|------|------|------|------|
| 6     | 7       | 8             |      |      |      |      |      |      |
|       |         |               |      | h    | k    | l    | h+k  | h+l  |
| k+l   | h+k+l   | h+k, h+l, k+l |      |      |      |      |      |      |
| 1     | 0.00236 | 20.60         | 116  | 18.0 | 21.6 | 19.0 | 20.5 | 19.6 |
| 20.5  | 18.0    | 21.6          | 19.7 | 0.0  | 17.4 | 20.7 | 19.9 | 19.0 |

|      |         |       |      |      |      |      |      |      |      |      |      |      |
|------|---------|-------|------|------|------|------|------|------|------|------|------|------|
| 2    | 0.00707 | 11.89 | 128  | 19.0 | 20.6 | 18.3 | 21.6 | 20.0 | 19.7 | 20.0 | 19.7 | 18.3 |
| 21.6 | 19.0    | 20.6  | 19.8 | 0.0  | 17.7 | 20.6 |      |      |      |      |      |      |
| 3    | 0.01178 | 9.21  | 160  | 18.4 | 19.7 | 18.0 | 20.1 | 20.6 | 17.9 | 20.6 | 17.9 | 18.0 |
| 20.1 | 18.4    | 19.7  | 19.1 | 0.0  | 18.7 | 19.2 |      |      |      |      |      |      |
| 4    | 0.01649 | 7.79  | 197  | 17.8 | 19.8 | 18.2 | 19.4 | 18.2 | 19.3 | 18.2 | 19.3 | 18.2 |
| 19.4 | 17.8    | 19.8  | 18.7 | 0.0  | 16.9 | 19.5 |      |      |      |      |      |      |
| 5    | 0.02121 | 6.87  | 219  | 17.0 | 19.2 | 17.9 | 18.1 | 17.5 | 18.4 | 17.5 | 18.4 | 17.9 |
| 18.1 | 17.0    | 19.2  | 18.0 | 0.0  | 16.6 | 18.5 |      |      |      |      |      |      |
| 6    | 0.02592 | 6.21  | 229  | 17.4 | 18.4 | 17.9 | 17.9 | 18.6 | 17.3 | 18.6 | 17.3 | 17.9 |
| 17.9 | 17.4    | 18.4  | 17.9 | 0.0  | 18.1 | 17.9 |      |      |      |      |      |      |
| 7    | 0.03063 | 5.71  | 270  | 18.7 | 17.8 | 18.2 | 18.4 | 18.2 | 18.4 | 18.2 | 18.4 | 18.2 |
| 18.4 | 18.7    | 17.8  | 18.3 | 0.0  | 18.5 | 18.2 |      |      |      |      |      |      |
| 8    | 0.03535 | 5.32  | 260  | 17.4 | 18.7 | 18.1 | 18.0 | 17.2 | 19.0 | 17.2 | 19.0 | 18.1 |
| 18.0 | 17.4    | 18.7  | 18.0 | 0.0  | 16.6 | 18.5 |      |      |      |      |      |      |
| 9    | 0.04006 | 5.00  | 289  | 17.6 | 18.3 | 17.5 | 18.5 | 17.8 | 18.1 | 17.8 | 18.1 | 17.5 |
| 18.5 | 17.6    | 18.3  | 17.9 | 0.0  | 17.0 | 18.3 |      |      |      |      |      |      |
| 10   | 0.04477 | 4.73  | 292  | 18.0 | 18.1 | 17.6 | 18.4 | 18.2 | 17.8 | 18.2 | 17.8 | 17.6 |
| 18.4 | 18.0    | 18.1  | 18.0 | 0.0  | 17.8 | 18.1 |      |      |      |      |      |      |
| 11   | 0.04948 | 4.50  | 307  | 18.5 | 18.7 | 19.0 | 18.2 | 18.0 | 19.2 | 18.0 | 19.2 | 19.0 |
| 18.2 | 18.5    | 18.7  | 18.6 | 0.0  | 18.3 | 18.7 |      |      |      |      |      |      |
| 12   | 0.05420 | 4.30  | 330  | 17.2 | 17.7 | 17.1 | 17.8 | 17.8 | 17.1 | 17.8 | 17.1 | 17.1 |
| 17.8 | 17.2    | 17.7  | 17.5 | 0.0  | 17.2 | 17.5 |      |      |      |      |      |      |
| 13   | 0.05891 | 4.12  | 343  | 18.2 | 18.6 | 17.8 | 19.0 | 18.0 | 18.8 | 18.0 | 18.8 | 17.8 |
| 19.0 | 18.2    | 18.6  | 18.4 | 0.0  | 17.3 | 18.8 |      |      |      |      |      |      |
| 14   | 0.06362 | 3.96  | 361  | 18.2 | 18.1 | 18.0 | 18.4 | 17.8 | 18.6 | 17.8 | 18.6 | 18.0 |
| 18.4 | 18.2    | 18.1  | 18.2 | 0.0  | 17.6 | 18.4 |      |      |      |      |      |      |
| 15   | 0.06833 | 3.83  | 376  | 17.2 | 17.7 | 17.5 | 17.3 | 17.0 | 17.9 | 17.0 | 17.9 | 17.5 |
| 17.3 | 17.2    | 17.7  | 17.4 | 0.0  | 16.9 | 17.6 |      |      |      |      |      |      |
| 16   | 0.07305 | 3.70  | 365  | 16.8 | 17.7 | 17.1 | 17.3 | 17.3 | 17.2 | 17.3 | 17.2 | 17.1 |
| 17.3 | 16.8    | 17.7  | 17.2 | 0.0  | 16.7 | 17.4 |      |      |      |      |      |      |
| 17   | 0.07776 | 3.59  | 391  | 16.5 | 16.6 | 16.5 | 16.6 | 16.4 | 16.7 | 16.4 | 16.7 | 16.5 |
| 16.6 | 16.5    | 16.6  | 16.5 | 0.0  | 16.4 | 16.6 |      |      |      |      |      |      |
| 18   | 0.08247 | 3.48  | 413  | 16.4 | 16.6 | 16.2 | 16.8 | 16.6 | 16.4 | 16.6 | 16.4 | 16.2 |

|      |         |      |      |     |      |      |      |      |      |      |      |      |      |      |
|------|---------|------|------|-----|------|------|------|------|------|------|------|------|------|------|
| 16.8 | 16.4    | 16.6 | 16.5 | 0.0 | 16.2 | 16.6 |      |      |      |      |      |      |      |      |
| 19   | 0.08718 |      | 3.39 |     | 430  | 16.1 | 16.0 | 15.7 | 16.4 | 15.8 | 16.3 | 15.8 | 16.3 | 15.7 |
| 16.4 | 16.1    | 16.0 | 16.0 | 0.0 | 15.4 | 16.3 |      |      |      |      |      |      |      |      |
| 20   | 0.09190 |      | 3.30 |     | 453  | 16.0 | 16.7 | 16.4 | 16.3 | 15.9 | 16.8 | 15.9 | 16.8 | 16.4 |
| 16.3 | 16.0    | 16.7 | 16.3 | 0.0 | 15.7 | 16.6 |      |      |      |      |      |      |      |      |
| 21   | 0.09661 |      | 3.22 |     | 467  | 15.7 | 15.2 | 15.4 | 15.5 | 15.6 | 15.3 | 15.6 | 15.3 | 15.4 |
| 15.5 | 15.7    | 15.2 | 15.5 | 0.0 | 15.8 | 15.3 |      |      |      |      |      |      |      |      |
| 22   | 0.10132 |      | 3.14 |     | 470  | 15.6 | 16.1 | 15.9 | 15.8 | 15.6 | 16.1 | 15.6 | 16.1 | 15.9 |
| 15.8 | 15.6    | 16.1 | 15.8 | 0.0 | 15.4 | 16.0 |      |      |      |      |      |      |      |      |
| 23   | 0.10604 |      | 3.07 |     | 526  | 15.1 | 15.0 | 15.1 | 15.0 | 15.1 | 14.9 | 15.1 | 14.9 | 15.1 |
| 15.0 | 15.1    | 15.0 | 15.0 | 0.0 | 15.2 | 15.0 |      |      |      |      |      |      |      |      |
| 24   | 0.11075 |      | 3.00 |     | 525  | 16.4 | 15.2 | 15.5 | 16.1 | 15.3 | 16.3 | 15.3 | 16.3 | 15.5 |
| 16.1 | 16.4    | 15.2 | 15.8 | 0.0 | 15.6 | 15.8 |      |      |      |      |      |      |      |      |
| 25   | 0.11546 |      | 2.94 |     | 578  | 16.0 | 16.1 | 15.7 | 16.4 | 15.7 | 16.4 | 15.7 | 16.4 | 15.7 |
| 16.4 | 16.0    | 16.1 | 16.0 | 0.0 | 15.3 | 16.3 |      |      |      |      |      |      |      |      |
| 26   | 0.12017 |      | 2.88 |     | 566  | 15.7 | 16.1 | 16.0 | 15.9 | 15.9 | 16.0 | 15.9 | 16.0 | 16.0 |
| 15.9 | 15.7    | 16.1 | 15.9 | 0.0 | 15.7 | 16.0 |      |      |      |      |      |      |      |      |
| 27   | 0.12489 |      | 2.83 |     | 607  | 16.3 | 15.4 | 15.4 | 16.3 | 15.5 | 16.3 | 15.5 | 16.3 | 15.4 |
| 16.3 | 16.3    | 15.4 | 15.9 | 0.0 | 15.4 | 16.0 |      |      |      |      |      |      |      |      |
| 28   | 0.12960 |      | 2.78 |     | 624  | 15.6 | 16.1 | 15.7 | 16.0 | 15.2 | 16.4 | 15.2 | 16.4 | 15.7 |
| 16.0 | 15.6    | 16.1 | 15.8 | 0.0 | 14.9 | 16.2 |      |      |      |      |      |      |      |      |
| 29   | 0.13431 |      | 2.73 |     | 591  | 16.0 | 15.9 | 15.9 | 15.9 | 16.1 | 15.8 | 16.1 | 15.8 | 15.9 |
| 15.9 | 16.0    | 15.9 | 15.9 | 0.0 | 16.1 | 15.9 |      |      |      |      |      |      |      |      |
| 30   | 0.13902 |      | 2.68 |     | 683  | 16.2 | 16.1 | 15.9 | 16.3 | 16.0 | 16.2 | 16.0 | 16.2 | 15.9 |
| 16.3 | 16.2    | 16.1 | 16.1 | 0.0 | 15.9 | 16.2 |      |      |      |      |      |      |      |      |
| 31   | 0.14374 |      | 2.64 |     | 662  | 15.9 | 15.9 | 15.9 | 16.0 | 15.7 | 16.2 | 15.7 | 16.2 | 15.9 |
| 16.0 | 15.9    | 15.9 | 15.9 | 0.0 | 15.6 | 16.0 |      |      |      |      |      |      |      |      |
| 32   | 0.14845 |      | 2.60 |     | 696  | 15.1 | 16.1 | 15.7 | 15.4 | 15.6 | 15.6 | 15.6 | 15.6 | 15.7 |
| 15.4 | 15.1    | 16.1 | 15.6 | 0.0 | 15.2 | 15.7 |      |      |      |      |      |      |      |      |
| 33   | 0.15316 |      | 2.56 |     | 701  | 15.6 | 15.6 | 15.3 | 15.9 | 15.7 | 15.4 | 15.7 | 15.4 | 15.3 |
| 15.9 | 15.6    | 15.6 | 15.6 | 0.0 | 15.4 | 15.6 |      |      |      |      |      |      |      |      |
| 34   | 0.15787 |      | 2.52 |     | 741  | 15.3 | 15.9 | 15.5 | 15.7 | 15.5 | 15.7 | 15.5 | 15.7 | 15.5 |
| 15.7 | 15.3    | 15.9 | 15.6 | 0.0 | 15.1 | 15.7 |      |      |      |      |      |      |      |      |

|      |         |      |      |      |      |      |      |      |      |      |      |      |
|------|---------|------|------|------|------|------|------|------|------|------|------|------|
| 35   | 0.16259 | 2.48 | 715  | 15.1 | 16.7 | 15.9 | 15.9 | 15.7 | 16.1 | 15.7 | 16.1 | 15.9 |
| 15.9 | 15.1    | 16.7 | 15.9 | 0.0  | 15.0 | 16.2 |      |      |      |      |      |      |
| 36   | 0.16730 | 2.44 | 760  | 15.7 | 15.9 | 15.9 | 15.7 | 16.1 | 15.5 | 16.1 | 15.5 | 15.9 |
| 15.7 | 15.7    | 15.9 | 15.8 | 0.0  | 16.1 | 15.7 |      |      |      |      |      |      |
| 37   | 0.17201 | 2.41 | 747  | 15.1 | 15.8 | 15.2 | 15.7 | 15.5 | 15.4 | 15.5 | 15.4 | 15.2 |
| 15.7 | 15.1    | 15.8 | 15.4 | 0.0  | 14.9 | 15.6 |      |      |      |      |      |      |
| 38   | 0.17673 | 2.38 | 798  | 15.3 | 15.9 | 15.4 | 15.8 | 15.7 | 15.5 | 15.7 | 15.5 | 15.4 |
| 15.8 | 15.3    | 15.9 | 15.6 | 0.0  | 15.2 | 15.7 |      |      |      |      |      |      |
| 39   | 0.18144 | 2.35 | 728  | 15.4 | 15.5 | 15.3 | 15.6 | 15.2 | 15.7 | 15.2 | 15.7 | 15.3 |
| 15.6 | 15.4    | 15.5 | 15.4 | 0.0  | 15.0 | 15.6 |      |      |      |      |      |      |
| 40   | 0.18615 | 2.32 | 821  | 15.5 | 15.6 | 15.0 | 16.1 | 15.4 | 15.7 | 15.4 | 15.7 | 15.0 |
| 16.1 | 15.5    | 15.6 | 15.5 | 0.0  | 14.8 | 15.8 |      |      |      |      |      |      |
| 41   | 0.19086 | 2.29 | 795  | 15.1 | 15.9 | 15.5 | 15.6 | 15.5 | 15.6 | 15.5 | 15.6 | 15.5 |
| 15.6 | 15.1    | 15.9 | 15.5 | 0.0  | 15.0 | 15.7 |      |      |      |      |      |      |
| 42   | 0.19558 | 2.26 | 831  | 15.6 | 15.7 | 15.9 | 15.3 | 15.7 | 15.6 | 15.7 | 15.6 | 15.9 |
| 15.3 | 15.6    | 15.7 | 15.6 | 0.0  | 15.9 | 15.5 |      |      |      |      |      |      |
| 43   | 0.20029 | 2.23 | 816  | 15.3 | 16.1 | 15.7 | 15.6 | 15.5 | 15.8 | 15.5 | 15.8 | 15.7 |
| 15.6 | 15.3    | 16.1 | 15.6 | 0.0  | 15.1 | 15.8 |      |      |      |      |      |      |
| 44   | 0.20500 | 2.21 | 842  | 15.2 | 16.4 | 15.8 | 15.8 | 15.7 | 15.9 | 15.7 | 15.9 | 15.8 |
| 15.8 | 15.2    | 16.4 | 15.8 | 0.0  | 15.1 | 16.0 |      |      |      |      |      |      |
| 45   | 0.20971 | 2.18 | 847  | 15.3 | 14.6 | 14.8 | 15.1 | 14.7 | 15.1 | 14.7 | 15.1 | 14.8 |
| 15.1 | 15.3    | 14.6 | 14.9 | 0.0  | 14.9 | 14.9 |      |      |      |      |      |      |
| 46   | 0.21443 | 2.16 | 824  | 15.0 | 15.4 | 14.9 | 15.5 | 15.2 | 15.2 | 15.2 | 15.2 | 14.9 |
| 15.5 | 15.0    | 15.4 | 15.2 | 0.0  | 14.7 | 15.4 |      |      |      |      |      |      |
| 47   | 0.21914 | 2.14 | 875  | 14.6 | 14.9 | 14.9 | 14.6 | 14.8 | 14.7 | 14.8 | 14.7 | 14.9 |
| 14.6 | 14.6    | 14.9 | 14.7 | 0.0  | 14.8 | 14.7 |      |      |      |      |      |      |
| 48   | 0.22385 | 2.11 | 879  | 14.0 | 14.7 | 14.3 | 14.5 | 13.9 | 14.8 | 13.9 | 14.8 | 14.3 |
| 14.5 | 14.0    | 14.7 | 14.4 | 0.0  | 13.5 | 14.7 |      |      |      |      |      |      |
| 49   | 0.22857 | 2.09 | 890  | 13.7 | 14.4 | 14.0 | 14.2 | 14.2 | 14.0 | 14.2 | 14.0 | 14.0 |
| 14.2 | 13.7    | 14.4 | 14.1 | 0.0  | 13.7 | 14.2 |      |      |      |      |      |      |
| 50   | 0.23328 | 2.07 | 886  | 13.9 | 13.8 | 13.7 | 14.1 | 13.8 | 14.0 | 13.8 | 14.0 | 13.7 |
| 14.1 | 13.9    | 13.8 | 13.9 | 0.0  | 13.6 | 14.0 |      |      |      |      |      |      |
| 51   | 0.23799 | 2.05 | 889  | 13.5 | 13.6 | 13.1 | 14.1 | 13.4 | 13.8 | 13.4 | 13.8 | 13.1 |

|         |         |      |      |     |       |      |      |      |      |      |      |      |
|---------|---------|------|------|-----|-------|------|------|------|------|------|------|------|
| 14.1    | 13.5    | 13.6 | 13.6 | 0.0 | 12.9  | 13.8 |      |      |      |      |      |      |
| 52      | 0.24270 | 2.03 |      |     | 930   | 13.6 | 13.4 | 13.5 | 13.5 | 13.5 | 13.5 | 13.5 |
| 13.5    | 13.6    | 13.4 | 13.5 | 0.0 | 13.6  | 13.5 |      |      |      |      |      |      |
| 53      | 0.24742 | 2.01 |      |     | 894   | 12.7 | 13.3 | 12.6 | 13.5 | 12.8 | 13.3 | 12.6 |
| 13.5    | 12.7    | 13.3 | 13.0 | 0.0 | 12.0  | 13.4 |      |      |      |      |      |      |
| 54      | 0.25213 | 1.99 |      |     | 948   | 13.1 | 12.6 | 12.7 | 13.0 | 12.8 | 12.9 | 12.7 |
| 13.0    | 13.1    | 12.6 | 12.9 | 0.0 | 12.9  | 12.9 |      |      |      |      |      |      |
| 55      | 0.25684 | 1.97 |      |     | 916   | 12.4 | 12.8 | 12.5 | 12.6 | 12.3 | 12.9 | 12.5 |
| 12.6    | 12.4    | 12.8 | 12.6 | 0.0 | 12.1  | 12.8 |      |      |      |      |      |      |
| 56      | 0.26155 | 1.96 |      |     | 949   | 12.3 | 12.0 | 11.8 | 12.5 | 12.0 | 12.3 | 11.8 |
| 12.5    | 12.3    | 12.0 | 12.2 | 0.0 | 11.8  | 12.3 |      |      |      |      |      |      |
| 57      | 0.26627 | 1.94 |      |     | 954   | 12.4 | 12.0 | 12.3 | 12.0 | 11.9 | 12.5 | 12.3 |
| 12.0    | 12.4    | 12.0 | 12.2 | 0.0 | 12.2  | 12.2 |      |      |      |      |      |      |
| 58      | 0.27098 | 1.92 |      |     | 938   | 11.2 | 11.6 | 11.4 | 11.4 | 11.4 | 11.4 | 11.4 |
| 11.4    | 11.2    | 11.6 | 11.4 | 0.0 | 11.2  | 11.5 |      |      |      |      |      |      |
| 59      | 0.27569 | 1.90 |      |     | 988   | 11.0 | 11.2 | 11.1 | 11.2 | 11.3 | 11.0 | 11.1 |
| 11.2    | 11.0    | 11.2 | 11.1 | 0.0 | 11.1  | 11.1 |      |      |      |      |      |      |
| 60      | 0.28040 | 1.89 |      |     | 961   | 10.0 | 10.1 | 10.0 | 10.1 | 9.9  | 10.2 | 10.0 |
| 10.1    | 10.0    | 10.1 | 10.0 | 0.0 | 9.8   | 10.1 |      |      |      |      |      |      |
| Totals: |         |      |      |     | 36787 | 14.8 | 15.1 | 14.8 | 15.1 | 14.9 | 15.1 | 14.8 |
| 15.1    | 14.8    | 15.1 | 15.0 | 0.0 | 14.6  | 15.1 |      |      |      |      |      |      |

<B><FONT COLOR=' #FF0000' ><!--SUMMARY\_BEGIN-->

# INTENSITY TO AMPLITUDE CONVERSION:

Norm calculation summary:

Calculation using Wilson prior.

Anisotropy correction applied to norm.

Number of outliers and ice ring reflections not used in norm calculation (Read (1999) ): 0

During the truncate procedure 2 intensities have been flagged as unphysical (too small).

Number of outliers detected in final norm (Read (1999) ): 0

&lt;!--SUMMARY\_END--&gt;&lt;/FONT&gt;&lt;/B&gt;

\$TABLE: Phil plot:

```
$GRAPHS: Phil plot - normalised values:A:1,2,3,4:
```

: Phil plot - vs sigma:A:1,5,6,7:

| Value | Io/Sigma | I/Sigma | F/Sigma**0.5 | Io/sigIo | I/sigI | F/sigF |
|-------|----------|---------|--------------|----------|--------|--------|
|-------|----------|---------|--------------|----------|--------|--------|

\$\$

|           |          |          |          |          |          |          |
|-----------|----------|----------|----------|----------|----------|----------|
| -5. 00000 | 0. 00000 | 0. 00000 | 0. 00000 | 0. 00000 | 0. 00000 | 0. 00000 |
| -4. 92500 | 0. 00000 | 0. 00000 | 0. 00000 | 0. 00000 | 0. 00000 | 0. 00000 |
| -4. 85000 | 0. 00000 | 0. 00000 | 0. 00000 | 0. 00000 | 0. 00000 | 0. 00000 |
| -4. 77500 | 0. 00000 | 0. 00000 | 0. 00000 | 0. 00000 | 0. 00000 | 0. 00000 |
| -4. 70000 | 0. 00000 | 0. 00000 | 0. 00000 | 0. 00000 | 0. 00000 | 0. 00000 |
| -4. 62500 | 0. 00000 | 0. 00000 | 0. 00000 | 0. 00000 | 0. 00000 | 0. 00000 |
| -4. 55000 | 0. 00000 | 0. 00000 | 0. 00000 | 0. 00000 | 0. 00000 | 0. 00000 |
| -4. 47500 | 0. 00000 | 0. 00000 | 0. 00000 | 0. 00000 | 0. 00000 | 0. 00000 |
| -4. 40000 | 0. 00000 | 0. 00000 | 0. 00000 | 0. 00000 | 0. 00000 | 0. 00000 |
| -4. 32500 | 0. 00000 | 0. 00000 | 0. 00000 | 0. 00000 | 0. 00000 | 0. 00000 |
| -4. 25000 | 0. 00000 | 0. 00000 | 0. 00000 | 0. 00000 | 0. 00000 | 0. 00000 |
| -4. 17500 | 0. 00000 | 0. 00000 | 0. 00000 | 0. 00000 | 0. 00000 | 0. 00000 |
| -4. 10000 | 0. 00000 | 0. 00000 | 0. 00000 | 0. 00000 | 0. 00000 | 0. 00000 |
| -4. 02500 | 0. 00000 | 0. 00000 | 0. 00000 | 0. 00000 | 0. 00000 | 0. 00000 |
| -3. 95000 | 0. 00000 | 0. 00000 | 0. 00000 | 0. 00000 | 0. 00000 | 0. 00000 |
| -3. 87500 | 0. 00000 | 0. 00000 | 0. 00000 | 0. 00000 | 0. 00000 | 0. 00000 |
| -3. 80000 | 0. 00000 | 0. 00000 | 0. 00000 | 0. 00000 | 0. 00000 | 0. 00000 |
| -3. 72500 | 0. 00000 | 0. 00000 | 0. 00000 | 0. 00000 | 0. 00000 | 0. 00000 |
| -3. 65000 | 0. 00000 | 0. 00000 | 0. 00000 | 0. 00000 | 0. 00000 | 0. 00000 |
| -3. 57500 | 0. 00000 | 0. 00000 | 0. 00000 | 0. 00000 | 0. 00000 | 0. 00000 |
| -3. 50000 | 0. 00000 | 0. 00000 | 0. 00000 | 0. 00000 | 0. 00000 | 0. 00000 |

|          |          |         |         |          |         |         |
|----------|----------|---------|---------|----------|---------|---------|
| -3.42500 | 0.00000  | 0.00000 | 0.00000 | 0.00000  | 0.00000 | 0.00000 |
| -3.35000 | 0.00000  | 0.00000 | 0.00000 | 0.00000  | 0.00000 | 0.00000 |
| -3.27500 | 0.00000  | 0.00000 | 0.00000 | 0.00000  | 0.00000 | 0.00000 |
| -3.20000 | 0.00000  | 0.00000 | 0.00000 | 0.00000  | 0.00000 | 0.00000 |
| -3.12500 | 0.00000  | 0.00000 | 0.00000 | 0.00000  | 0.00000 | 0.00000 |
| -3.05000 | 0.00000  | 0.00000 | 0.00000 | 0.00000  | 0.00000 | 0.00000 |
| -2.97500 | 0.00000  | 0.00000 | 0.00000 | 0.00000  | 0.00000 | 0.00000 |
| -2.90000 | 0.00000  | 0.00000 | 0.00000 | 0.00000  | 0.00000 | 0.00000 |
| -2.82500 | 0.00000  | 0.00000 | 0.00000 | 0.00000  | 0.00000 | 0.00000 |
| -2.75000 | 0.00000  | 0.00000 | 0.00000 | 0.00000  | 0.00000 | 0.00000 |
| -2.67500 | 0.00000  | 0.00000 | 0.00000 | 0.00000  | 0.00000 | 0.00000 |
| -2.60000 | 0.00000  | 0.00000 | 0.00000 | 0.00000  | 0.00000 | 0.00000 |
| -2.52500 | 0.00000  | 0.00000 | 0.00000 | 0.00000  | 0.00000 | 0.00000 |
| -2.45000 | 0.50000  | 0.00000 | 0.00000 | 0.00000  | 0.00000 | 0.00000 |
| -2.37500 | 0.50000  | 0.00000 | 0.00000 | 0.50000  | 0.00000 | 0.00000 |
| -2.30000 | 0.00000  | 0.00000 | 0.00000 | 1.00000  | 0.00000 | 0.00000 |
| -2.22500 | 0.50000  | 0.00000 | 0.00000 | 0.50000  | 0.00000 | 0.00000 |
| -2.15000 | 0.50000  | 0.00000 | 0.00000 | 1.99999  | 0.00000 | 0.00000 |
| -2.07500 | 0.00000  | 0.00000 | 0.00000 | 2.00000  | 0.00000 | 0.00000 |
| -2.00000 | 0.50000  | 0.00000 | 0.00000 | 2.50000  | 0.00000 | 0.00000 |
| -1.92500 | 1.50000  | 0.00000 | 0.00000 | 3.00000  | 0.00000 | 0.00000 |
| -1.85000 | 1.00000  | 0.00000 | 0.00000 | 1.50000  | 0.00000 | 0.00000 |
| -1.77500 | 0.50000  | 0.00000 | 0.00000 | 3.50000  | 0.00000 | 0.00000 |
| -1.70000 | 2.00000  | 0.00000 | 0.00000 | 8.50000  | 0.00000 | 0.00000 |
| -1.62500 | 3.00000  | 0.00000 | 0.00000 | 12.50000 | 0.00000 | 0.00000 |
| -1.55000 | 4.00000  | 0.00000 | 0.00000 | 14.00000 | 0.00000 | 0.00000 |
| -1.47500 | 4.00000  | 0.00000 | 0.00000 | 15.50000 | 0.00000 | 0.00000 |
| -1.40000 | 4.00000  | 0.00000 | 0.00000 | 14.50000 | 0.00000 | 0.00000 |
| -1.32500 | 5.00000  | 0.00000 | 0.00000 | 18.99999 | 0.00000 | 0.00000 |
| -1.25000 | 5.00000  | 0.00000 | 0.00000 | 26.00000 | 0.00000 | 0.00000 |
| -1.17500 | 5.50000  | 0.00000 | 0.00000 | 30.00000 | 0.00000 | 0.00000 |
| -1.10000 | 8.50000  | 0.00000 | 0.00000 | 44.49999 | 0.00000 | 0.00000 |
| -1.02500 | 14.00000 | 0.00000 | 0.00000 | 54.50000 | 0.00000 | 0.00000 |

|          |            |            |            |           |            |           |
|----------|------------|------------|------------|-----------|------------|-----------|
| -0.95000 | 15.00000   | 0.00000    | 0.00000    | 70.50001  | 0.00000    | 0.00000   |
| -0.87500 | 13.50000   | 0.00000    | 0.00000    | 79.00000  | 0.00000    | 0.00000   |
| -0.80000 | 19.50000   | 0.00000    | 0.00000    | 84.50000  | 0.00000    | 0.00000   |
| -0.72500 | 31.50000   | 0.00000    | 0.00000    | 96.50000  | 0.00000    | 0.00000   |
| -0.65000 | 41.50000   | 0.00000    | 0.00000    | 102.00001 | 0.00000    | 0.00000   |
| -0.57500 | 41.50000   | 0.00000    | 0.00000    | 121.00000 | 0.00000    | 0.00000   |
| -0.50000 | 58.50000   | 0.00000    | 0.00000    | 142.00000 | 0.00000    | 0.00000   |
| -0.42500 | 93.00000   | 0.00000    | 0.00000    | 160.50000 | 0.00000    | 0.00000   |
| -0.35000 | 135.00000  | 0.00000    | 0.00000    | 187.00000 | 0.00000    | 0.00000   |
| -0.27500 | 183.50000  | 0.00000    | 0.00000    | 213.00000 | 0.00000    | 0.00000   |
| -0.20000 | 269.49999  | 0.00000    | 0.00000    | 232.00000 | 0.00000    | 0.00000   |
| -0.12500 | 445.50000  | 0.00000    | 0.00000    | 250.50000 | 0.00000    | 0.00000   |
| -0.05000 | 968.49999  | 212.50000  | 7.00000    | 265.00000 | 0.00000    | 0.00000   |
| 0.02500  | 1945.00001 | 1243.00001 | 84.00000   | 304.50000 | 0.00000    | 0.00000   |
| 0.10000  | 2546.00000 | 2295.00001 | 307.50001  | 329.00000 | 0.00000    | 0.00000   |
| 0.17500  | 2593.50000 | 2746.49998 | 686.99998  | 347.50000 | 0.00000    | 0.00000   |
| 0.25000  | 2601.50000 | 3047.00000 | 1190.50000 | 374.00000 | 0.00000    | 0.00000   |
| 0.32500  | 2538.00002 | 3093.00001 | 1781.99990 | 372.50000 | 0.00000    | 0.00000   |
| 0.40000  | 2470.00000 | 3056.00000 | 2441.50005 | 374.50000 | 0.00000    | 0.00000   |
| 0.47500  | 2439.50000 | 2976.00001 | 3082.49995 | 386.00000 | 0.00000    | 0.00000   |
| 0.55000  | 2335.49997 | 2757.99996 | 3577.50006 | 407.50000 | 0.00000    | 0.00000   |
| 0.62500  | 2210.50000 | 2583.50000 | 3876.50000 | 443.00000 | 0.00000    | 0.00000   |
| 0.70000  | 2178.50000 | 2462.00003 | 3968.50000 | 463.50000 | 4.00000    | 0.00000   |
| 0.77500  | 2128.00004 | 2294.50005 | 3978.99999 | 452.50001 | 95.49994   | 0.00000   |
| 0.85000  | 1966.99994 | 2131.99995 | 3924.99995 | 446.00000 | 211.00002  | 0.00000   |
| 0.92500  | 1893.00001 | 2021.99999 | 3805.49998 | 483.50001 | 251.50000  | 0.00000   |
| 1.00000  | 1885.50000 | 1966.00000 | 3720.00000 | 512.50000 | 219.50000  | 0.00000   |
| 1.07500  | 1798.49993 | 1843.49988 | 3643.49995 | 479.99997 | 239.50008  | 0.00000   |
| 1.15000  | 1692.50003 | 1713.00002 | 3555.00003 | 475.49999 | 600.99981  | 0.00000   |
| 1.22500  | 1615.99998 | 1672.50000 | 3418.99995 | 497.00000 | 1183.00018 | 0.00000   |
| 1.30000  | 1560.50004 | 1622.00006 | 3224.00014 | 495.00000 | 1507.99995 | 1.50000   |
| 1.37500  | 1523.00000 | 1539.00000 | 3023.00000 | 499.50000 | 1446.50000 | 65.00000  |
| 1.45000  | 1495.99998 | 1486.49998 | 2822.99986 | 486.49998 | 1343.50000 | 162.50005 |

|          |             |             |             |            |             |            |
|----------|-------------|-------------|-------------|------------|-------------|------------|
| 1. 52500 | 1445. 00002 | 1412. 50004 | 2668. 00003 | 496. 49998 | 1295. 00003 | 201. 50000 |
| 1. 60000 | 1372. 99997 | 1327. 49998 | 2475. 49991 | 503. 99999 | 1174. 99995 | 196. 49999 |
| 1. 67500 | 1268. 00008 | 1265. 00005 | 2257. 00009 | 472. 50001 | 1058. 50006 | 157. 50004 |
| 1. 75000 | 1212. 50000 | 1210. 50000 | 2083. 00000 | 477. 00000 | 961. 50000  | 117. 50000 |
| 1. 82500 | 1173. 99994 | 1160. 49996 | 1883. 99988 | 468. 99997 | 863. 49994  | 93. 49998  |
| 1. 90000 | 1111. 50001 | 1103. 50001 | 1719. 00004 | 481. 99998 | 804. 50001  | 75. 00000  |
| 1. 97500 | 1085. 99999 | 1067. 49999 | 1578. 49995 | 485. 49998 | 758. 49998  | 78. 00000  |
| 2. 05000 | 1052. 50003 | 1025. 00004 | 1373. 50017 | 456. 00000 | 704. 00003  | 188. 99987 |
| 2. 12500 | 1012. 50000 | 1005. 00000 | 1202. 00000 | 468. 00000 | 651. 50000  | 472. 00000 |
| 2. 20000 | 983. 49999  | 968. 99994  | 1081. 99990 | 475. 50000 | 614. 99999  | 793. 00018 |
| 2. 27500 | 926. 99989  | 869. 99987  | 893. 49972  | 458. 49996 | 592. 49996  | 961. 50007 |
| 2. 35000 | 878. 00001  | 846. 99992  | 751. 00009  | 444. 50000 | 554. 50006  | 990. 99999 |
| 2. 42500 | 857. 50002  | 854. 50003  | 698. 50002  | 442. 00001 | 543. 99998  | 918. 50010 |
| 2. 50000 | 842. 50000  | 816. 00000  | 627. 50000  | 437. 00000 | 518. 50000  | 836. 00000 |
| 2. 57500 | 790. 49993  | 776. 49997  | 506. 49991  | 425. 99999 | 488. 50001  | 832. 00000 |
| 2. 65000 | 738. 50000  | 732. 99995  | 432. 99999  | 413. 49999 | 474. 99995  | 800. 49991 |
| 2. 72500 | 704. 00009  | 701. 00003  | 376. 00013  | 417. 49998 | 453. 50000  | 740. 00007 |
| 2. 80000 | 689. 49997  | 698. 49999  | 303. 00003  | 425. 50000 | 441. 00002  | 690. 00003 |
| 2. 87500 | 707. 50000  | 671. 00000  | 255. 00000  | 421. 50000 | 434. 00000  | 640. 50000 |
| 2. 95000 | 667. 99995  | 624. 49999  | 210. 49998  | 405. 49999 | 435. 50000  | 599. 49998 |
| 3. 02500 | 610. 49995  | 604. 99997  | 187. 49999  | 416. 50005 | 409. 99994  | 547. 99991 |
| 3. 10000 | 592. 99999  | 584. 00003  | 162. 00005  | 423. 50004 | 400. 99997  | 506. 50001 |
| 3. 17500 | 589. 00001  | 572. 00000  | 129. 00002  | 397. 50001 | 395. 00002  | 485. 50002 |
| 3. 25000 | 562. 50000  | 553. 50000  | 101. 00000  | 385. 50000 | 369. 00000  | 463. 00000 |
| 3. 32500 | 534. 99999  | 516. 99998  | 73. 49998   | 371. 49998 | 360. 00000  | 445. 49999 |
| 3. 40000 | 510. 99996  | 486. 49997  | 61. 50000   | 357. 00000 | 343. 49996  | 414. 49995 |
| 3. 47500 | 488. 00002  | 483. 49998  | 53. 00002   | 371. 49996 | 350. 49995  | 382. 50003 |
| 3. 55000 | 480. 50000  | 470. 50003  | 40. 50000   | 387. 50000 | 370. 50000  | 375. 99999 |
| 3. 62500 | 463. 00000  | 466. 00000  | 38. 00000   | 373. 00000 | 359. 50000  | 374. 00000 |
| 3. 70000 | 436. 49999  | 445. 99995  | 24. 99998   | 346. 49999 | 352. 00000  | 354. 99998 |
| 3. 77500 | 409. 49995  | 399. 99998  | 11. 50000   | 336. 50000 | 343. 49997  | 327. 49996 |
| 3. 85000 | 394. 49999  | 401. 99997  | 13. 00000   | 340. 99999 | 333. 00000  | 322. 99997 |
| 3. 92500 | 397. 00000  | 413. 50000  | 13. 50000   | 346. 50000 | 320. 00002  | 313. 50003 |

|          |            |            |          |            |            |            |
|----------|------------|------------|----------|------------|------------|------------|
| 4. 00000 | 407. 50000 | 400. 50000 | 9. 50000 | 333. 50000 | 316. 00000 | 297. 00000 |
| 4. 07500 | 406. 00007 | 373. 50007 | 7. 49999 | 324. 99996 | 312. 50006 | 301. 00000 |
| 4. 15000 | 378. 99996 | 349. 49997 | 5. 99999 | 331. 50000 | 308. 50002 | 293. 49998 |
| 4. 22500 | 337. 00007 | 330. 00002 | 3. 50000 | 326. 50001 | 320. 99999 | 274. 50003 |
| 4. 30000 | 311. 00001 | 313. 99996 | 3. 50000 | 323. 50001 | 314. 99995 | 256. 99997 |
| 4. 37500 | 314. 50000 | 296. 50000 | 2. 00000 | 309. 50000 | 307. 50000 | 250. 00000 |
| 4. 45000 | 294. 50011 | 273. 50006 | 1. 00000 | 316. 99988 | 307. 50001 | 269. 49990 |
| 4. 52500 | 290. 00004 | 270. 00002 | 1. 00000 | 318. 49995 | 306. 00000 | 262. 99993 |
| 4. 60000 | 288. 50005 | 286. 99998 | 0. 50000 | 306. 99997 | 293. 00004 | 233. 00001 |
| 4. 67500 | 277. 00004 | 273. 49989 | 0. 50000 | 306. 49995 | 277. 49999 | 239. 00005 |
| 4. 75000 | 273. 00000 | 252. 50000 | 1. 50000 | 292. 00000 | 289. 00000 | 241. 50000 |
| 4. 82500 | 263. 99999 | 250. 50001 | 2. 00000 | 299. 49994 | 302. 50000 | 229. 50003 |
| 4. 90000 | 249. 99996 | 230. 99996 | 2. 00000 | 302. 99998 | 304. 50000 | 214. 99998 |
| 4. 97500 | 220. 00004 | 223. 49998 | 1. 50000 | 301. 99998 | 294. 50003 | 217. 99997 |
| 5. 05000 | 203. 49999 | 222. 99995 | 0. 50000 | 310. 50001 | 290. 50004 | 218. 99994 |
| 5. 12500 | 217. 50000 | 216. 00000 | 0. 00000 | 299. 50000 | 284. 00000 | 207. 50000 |
| 5. 20000 | 222. 00006 | 199. 50010 | 0. 00000 | 281. 00003 | 276. 99996 | 202. 00003 |
| 5. 27500 | 205. 99999 | 184. 00001 | 0. 00000 | 276. 00000 | 266. 49996 | 200. 50001 |
| 5. 35000 | 188. 50003 | 179. 50002 | 0. 00000 | 271. 50001 | 248. 50000 | 204. 00000 |
| 5. 42500 | 166. 99996 | 159. 99994 | 0. 00000 | 256. 49995 | 262. 50007 | 212. 50004 |
| 5. 50000 | 165. 00000 | 151. 00000 | 0. 00000 | 261. 50000 | 289. 00000 | 205. 50000 |
| 5. 57500 | 160. 50005 | 161. 49996 | 0. 00000 | 283. 49996 | 271. 50015 | 190. 00000 |
| 5. 65000 | 148. 50000 | 165. 99999 | 0. 00000 | 289. 50000 | 238. 99999 | 190. 00000 |
| 5. 72500 | 160. 99996 | 145. 50004 | 0. 00000 | 279. 50002 | 260. 49994 | 201. 99997 |
| 5. 80000 | 153. 99989 | 131. 50001 | 0. 00000 | 275. 50002 | 277. 99996 | 192. 49989 |
| 5. 87500 | 135. 50000 | 150. 50000 | 0. 00000 | 272. 00000 | 271. 50000 | 180. 00000 |
| 5. 95000 | 142. 49998 | 144. 50011 | 0. 00000 | 252. 00006 | 264. 50004 | 181. 00004 |
| 6. 02500 | 137. 99998 | 134. 00003 | 0. 00000 | 254. 50004 | 244. 99997 | 172. 50000 |
| 6. 10000 | 136. 99998 | 142. 50001 | 0. 00000 | 262. 00002 | 243. 99997 | 171. 00000 |
| 6. 17500 | 138. 99997 | 130. 49996 | 0. 00000 | 249. 49997 | 266. 00006 | 171. 00001 |
| 6. 25000 | 128. 50000 | 122. 50000 | 0. 00000 | 258. 50000 | 258. 50000 | 171. 00000 |
| 6. 32500 | 124. 00000 | 122. 50000 | 0. 00000 | 250. 00012 | 253. 99993 | 169. 00001 |
| 6. 40000 | 125. 00000 | 116. 49999 | 0. 00000 | 247. 50005 | 242. 99994 | 158. 99998 |

|          |            |            |          |            |            |            |
|----------|------------|------------|----------|------------|------------|------------|
| 6. 47500 | 114. 00003 | 112. 50000 | 0. 00000 | 258. 00003 | 244. 99993 | 155. 99998 |
| 6. 55000 | 114. 00006 | 106. 99996 | 0. 00000 | 252. 00002 | 260. 99994 | 165. 00002 |
| 6. 62500 | 116. 00000 | 96. 50000  | 0. 00000 | 250. 50000 | 275. 50000 | 172. 50000 |
| 6. 70000 | 100. 00003 | 92. 50000  | 0. 00000 | 274. 49985 | 322. 99989 | 178. 49999 |
| 6. 77500 | 89. 99999  | 91. 00000  | 0. 50000 | 272. 99992 | 357. 00003 | 175. 99999 |
| 6. 85000 | 93. 99998  | 86. 00001  | 0. 50000 | 282. 99990 | 400. 49992 | 167. 50001 |
| 6. 92500 | 96. 49997  | 76. 49997  | 0. 00000 | 308. 49992 | 437. 50003 | 165. 50001 |
| 7. 00000 | 81. 50000  | 71. 50000  | 0. 00000 | 320. 50000 | 389. 00000 | 164. 50000 |
| 7. 07500 | 70. 50001  | 78. 49997  | 0. 00000 | 387. 49980 | 313. 50011 | 166. 49997 |
| 7. 15000 | 74. 50001  | 82. 49999  | 0. 00000 | 433. 50002 | 282. 49998 | 162. 49998 |
| 7. 22500 | 79. 50000  | 76. 50001  | 0. 00000 | 437. 50001 | 258. 50004 | 158. 99998 |
| 7. 30000 | 86. 00004  | 79. 50003  | 0. 00000 | 366. 49965 | 242. 99999 | 155. 49995 |
| 7. 37500 | 85. 50000  | 83. 00000  | 0. 00000 | 268. 50000 | 223. 50000 | 152. 00000 |
| 7. 45000 | 68. 50005  | 72. 00004  | 0. 00000 | 229. 00005 | 204. 50000 | 160. 49999 |
| 7. 52500 | 68. 50002  | 62. 50000  | 0. 00000 | 221. 00001 | 216. 00003 | 150. 49997 |
| 7. 60000 | 70. 00002  | 62. 99999  | 0. 00000 | 218. 50001 | 226. 50000 | 148. 99997 |
| 7. 67500 | 64. 00001  | 61. 99998  | 0. 00000 | 212. 49999 | 217. 49996 | 161. 00001 |
| 7. 75000 | 61. 00000  | 54. 00000  | 0. 00000 | 225. 00000 | 219. 00000 | 154. 00000 |
| 7. 82500 | 55. 00001  | 50. 49999  | 0. 00000 | 230. 00005 | 219. 50004 | 140. 00003 |
| 7. 90000 | 51. 49999  | 57. 00001  | 0. 00000 | 213. 49998 | 207. 49999 | 140. 00002 |
| 7. 97500 | 55. 49998  | 57. 00001  | 0. 00000 | 206. 50000 | 200. 00001 | 152. 49998 |
| 8. 05000 | 57. 99998  | 47. 49998  | 0. 00000 | 201. 49997 | 194. 99999 | 148. 99995 |
| 8. 12500 | 56. 50000  | 42. 00000  | 0. 00000 | 209. 00000 | 193. 50000 | 155. 50000 |
| 8. 20000 | 52. 00004  | 42. 49999  | 0. 00000 | 205. 50008 | 195. 99998 | 163. 00005 |
| 8. 27500 | 38. 00007  | 44. 99999  | 0. 00000 | 189. 49999 | 203. 49995 | 143. 50011 |
| 8. 35000 | 42. 50012  | 41. 99996  | 0. 00000 | 200. 50011 | 198. 99991 | 144. 00011 |
| 8. 42500 | 46. 49996  | 43. 50003  | 0. 00000 | 208. 99999 | 197. 00004 | 144. 99995 |
| 8. 50000 | 46. 50000  | 44. 00000  | 0. 00000 | 210. 00000 | 211. 50000 | 147. 00000 |
| 8. 57500 | 50. 00002  | 35. 50002  | 0. 00000 | 204. 50004 | 214. 00003 | 151. 50004 |
| 8. 65000 | 42. 50004  | 32. 00000  | 0. 00000 | 200. 99995 | 205. 00004 | 140. 50004 |
| 8. 72500 | 33. 49994  | 29. 49997  | 0. 00000 | 215. 50010 | 199. 49998 | 153. 00016 |
| 8. 80000 | 27. 50000  | 29. 00001  | 0. 00000 | 211. 99993 | 196. 99999 | 156. 49994 |
| 8. 87500 | 30. 00000  | 34. 50000  | 0. 00000 | 202. 00000 | 197. 00000 | 137. 50000 |

|         |          |          |         |           |           |           |
|---------|----------|----------|---------|-----------|-----------|-----------|
| 8.95000 | 34.99999 | 36.50001 | 0.00000 | 201.00002 | 197.50000 | 133.49999 |
| 9.02500 | 37.99999 | 31.50004 | 0.00000 | 198.99998 | 194.50003 | 145.99990 |
| 9.10000 | 33.49994 | 29.00001 | 0.00000 | 192.99992 | 185.99994 | 142.99987 |
| 9.17500 | 31.50002 | 31.00001 | 0.00000 | 191.00003 | 184.00002 | 125.49998 |
| 9.25000 | 28.50000 | 30.50000 | 0.00000 | 194.50000 | 194.50000 | 135.00000 |
| 9.32500 | 22.99999 | 29.99999 | 0.00000 | 199.49996 | 210.99995 | 148.50000 |
| 9.40000 | 27.99996 | 31.99999 | 0.00000 | 206.50001 | 213.50008 | 144.00004 |
| 9.47500 | 29.49997 | 30.49997 | 0.00000 | 210.50005 | 219.50014 | 147.50008 |
| 9.55000 | 29.50001 | 26.99999 | 0.00000 | 213.49999 | 231.99999 | 159.50002 |
| 9.62500 | 29.00000 | 26.00000 | 0.00000 | 212.00000 | 233.50000 | 146.50000 |
| 9.70000 | 25.00001 | 26.00000 | 0.00000 | 236.49988 | 240.49998 | 137.99995 |
| 9.77500 | 25.49998 | 25.50001 | 0.00000 | 246.50015 | 258.49986 | 141.00006 |
| 9.85000 | 25.49998 | 22.49997 | 0.00000 | 234.00002 | 279.00007 | 140.00005 |
| 9.92500 | 22.99999 | 21.50001 | 0.00000 | 232.99998 | 284.49999 | 145.50000 |

\$\$

<B><FONT COLOR=' #FF0000'><!--SUMMARY\_BEGIN-->

ctruncate: Normal termination

Times: User: 18.6s System: 0.2s Elapsed: 0:19

</pre>

</html>

<!--SUMMARY\_END--></FONT></B>

<B><FONT COLOR=" #FF0000"><!--SUMMARY\_BEGIN-->

<html> <!-- CCP4 HTML LOGFILE -->

<hr>

<!--SUMMARY\_END--></FONT></B>

<B><FONT COLOR=" #FF0000"><!--SUMMARY\_BEGIN-->

<pre>

#####  
#####  
#####

### CCP4 7.1.009: MTZDUMP version 1.1 : ##

#####

User: yoshihisasuzuki Run date: 25/10/2021 Run time: 11:52:17

Please reference: Collaborative Computational Project, Number 4. 2011.

"Overview of the CCP4 suite and current developments". Acta Cryst. D67, 235-242.

as well as any specific reference in the program write-up.

<!--SUMMARY\_END--></FONT></B>

List reflection: 0

Symmetry to be listed

OPENED INPUT MTZ FILE

Logical Name: HKLIN Filename:

/tmp/yoshihisasuzuki/merge\_roomtemp\_GI\_pf\_7\_5\_mtz\_New.tmp

\* Title:

From Clipper CCP4MTZfile

\* Base dataset:

0 HKL\_base

HKL\_base

HKL\_base

\* Number of Datasets = 1

\* Dataset ID, project/crystal/dataset names, cell dimensions, wavelength:

1 New

New

New

94.0711 99.3468 103.1345 90.0000 90.0000 90.0000  
0.89999

\* Number of Columns = 18

\* Number of Reflections = 80452

\* Missing value set to NaN in input mtz file

\* Column Labels :

H K L F\_New SIGF\_New DANO\_New SIGDANO\_New F\_New(+) SIGF\_New(+) F\_New(-) SIGF\_New(-)  
ISYM\_New IMEAN\_New SIGIMEAN\_New I\_New(+) SIGI\_New(+) I\_New(-) SIGI\_New(-)

\* Column Types :

H H H F Q D Q G L G L Y J Q K M K M

\* Associated datasets :

0 0 0 1 1 1 1 1 1 1 1 1 1 1 1 1 1 1

\* Cell Dimensions : (obsolete - refer to dataset cell dimensions above)

94.0711 99.3468 103.1345 90.0000 90.0000 90.0000

\* Resolution Range :

0.00059 0.46913 ( 41.156 - 1.460 Å )

\* Sort Order :

0 0 0 0 0

\* Number of Symmetry Operations = 8

\* Number of Primitive Operations = 4

\* Space Group = 23 'I 2 2 2'

\* Lattice Type = I

\* Point Group Name = PG222

\* Symmetry Operations :

Symmetry 1 X, Y, Z

1.00 0.00 0.00 0.00

0.00 1.00 0.00 0.00

0.00 0.00 1.00 0.00

0.00 0.00 0.00 1.00

Symmetry 2 X, -Y, -Z

1.00 0.00 0.00 0.00

0.00 -1.00 0.00 0.00

0.00 0.00 -1.00 0.00

0.00 0.00 0.00 1.00

Symmetry 3 -X, Y, -Z

-1.00 0.00 0.00 0.00

0.00 1.00 0.00 0.00

0.00 0.00 -1.00 0.00

0.00 0.00 0.00 1.00

Symmetry 4 -X, -Y, Z

-1.00 0.00 0.00 0.00

0.00 -1.00 0.00 0.00

0.00 0.00 1.00 0.00

0.00 0.00 0.00 1.00

Symmetry 5  $X+1/2$ ,  $Y+1/2$ ,  $Z+1/2$

1.00 0.00 0.00 0.50

0.00 1.00 0.00 0.50

|                                    |       |       |      |
|------------------------------------|-------|-------|------|
| 0.00                               | 0.00  | 1.00  | 0.50 |
| 0.00                               | 0.00  | 0.00  | 1.00 |
| Symmetry 6 $X+1/2, -Y+1/2, -Z+1/2$ |       |       |      |
| 1.00                               | 0.00  | 0.00  | 0.50 |
| 0.00                               | -1.00 | 0.00  | 0.50 |
| 0.00                               | 0.00  | -1.00 | 0.50 |
| 0.00                               | 0.00  | 0.00  | 1.00 |
| Symmetry 7 $-X+1/2, Y+1/2, -Z+1/2$ |       |       |      |
| -1.00                              | 0.00  | 0.00  | 0.50 |
| 0.00                               | 1.00  | 0.00  | 0.50 |
| 0.00                               | 0.00  | -1.00 | 0.50 |
| 0.00                               | 0.00  | 0.00  | 1.00 |
| Symmetry 8 $-X+1/2, -Y+1/2, Z+1/2$ |       |       |      |
| -1.00                              | 0.00  | 0.00  | 0.50 |
| 0.00                               | -1.00 | 0.00  | 0.50 |
| 0.00                               | 0.00  | 1.00  | 0.50 |
| 0.00                               | 0.00  | 0.00  | 1.00 |

(only pointgroup is fixed so far)

\*\*\*\*\* EPSILON ZONES - Reflection Classes and their multiplicity \*\*\*\*\*

EPSILON Zone 1  
 Reflections of type h00  
 Multiplicity 4

EPSILON Zone 2  
 Reflections of type 0k0  
 Multiplicity 4

EPSILON Zone 3  
 Reflections of type 00l

Multiplicity 4

EPSILON Zone 4

Reflections of type hkl

Multiplicity 2

\*\*\*\*\* CENTRIC ZONES \*\*\*\*\*

CENTRIC Zone 1

Reflections of type 0kl

CENTRIC Zone 2

Reflections of type h0l

CENTRIC Zone 3

Reflections of type hk0

OVERALL FILE STATISTICS for resolution range 0.001 - 0.469

=====

| Col | Sort  | Min    | Max    | Num     | %        | Mean   | Mean   | Resolution | Type | Column     |
|-----|-------|--------|--------|---------|----------|--------|--------|------------|------|------------|
| num | order |        |        | Missing | complete |        | abs.   | Low        | High | label      |
| 1   | ASC   | 0      | 64     | 0       | 100.00   | 24.4   | 24.4   | 41.16      | 1.46 | H H        |
| 2   | NONE  | 0      | 68     | 0       | 100.00   | 26.0   | 26.0   | 41.16      | 1.46 | H K        |
| 3   | NONE  | 0      | 70     | 0       | 100.00   | 26.7   | 26.7   | 41.16      | 1.46 | H L        |
| 4   | NONE  | 3.1    | 3923.7 | 1       | 100.00   | 367.60 | 367.60 | 41.16      | 1.46 | F F_New    |
| 5   | NONE  | 0.7    | 151.3  | 1       | 100.00   | 22.48  | 22.48  | 41.16      | 1.46 | Q SIGF_New |
| 6   | NONE  | 1861.3 | 1532.6 | 5837    | 92.74    | -2.26  | 25.65  | 41.16      | 1.46 | D DANO_New |
| 7   | NONE  | 0.0    | 174.9  | 5837    | 92.74    | 38.13  | 38.13  | 41.16      | 1.46 | Q          |

# SIGDANO\_New

|   |      |     |        |      |       |        |        |       |      |   |          |
|---|------|-----|--------|------|-------|--------|--------|-------|------|---|----------|
| 8 | NONE | 3.1 | 3923.7 | 3294 | 95.91 | 335.97 | 335.97 | 41.16 | 1.46 | G | F_New(+) |
| 9 | NONE | 0.9 | 151.3  | 3294 | 95.91 | 30.35  | 30.35  | 41.16 | 1.46 | L |          |

# SIGF\_New(+)

|    |      |     |        |      |       |        |        |       |      |   |          |
|----|------|-----|--------|------|-------|--------|--------|-------|------|---|----------|
| 10 | NONE | 3.1 | 3923.7 | 2543 | 96.84 | 346.35 | 346.35 | 41.16 | 1.46 | G | F_New(-) |
| 11 | NONE | 0.7 | 144.6  | 2543 | 96.84 | 27.77  | 27.77  | 41.16 | 1.46 | L |          |

# SIGF\_New(-)

|    |      |       |        |   |        |        |        |       |      |   |           |
|----|------|-------|--------|---|--------|--------|--------|-------|------|---|-----------|
| 12 | NONE | 0     | 2      | 0 | 100.00 | 0.1    | 0.1    | 41.16 | 1.46 | Y | ISYM_New  |
| 13 | NONE | -18.4 | 7982.3 | 0 | 100.00 | 137.17 | 137.27 | 41.16 | 1.46 | J | IMEAN_New |
| 14 | NONE | 0.0   | 551.0  | 0 | 100.00 | 10.11  | 10.11  | 41.16 | 1.46 | Q |           |

# SIGIMEAN\_New

|    |      |       |        |   |        |        |        |       |      |   |          |
|----|------|-------|--------|---|--------|--------|--------|-------|------|---|----------|
| 15 | NONE | -19.1 | 7925.9 | 0 | 100.00 | 107.81 | 108.06 | 41.16 | 1.46 | K | I_New(+) |
| 16 | NONE | 0.0   | 548.7  | 0 | 100.00 | 11.14  | 11.14  | 41.16 | 1.46 | M |          |

# SIGI\_New(+)

|    |      |       |        |   |        |        |        |       |      |   |          |
|----|------|-------|--------|---|--------|--------|--------|-------|------|---|----------|
| 17 | NONE | -20.8 | 7982.3 | 0 | 100.00 | 115.93 | 116.13 | 41.16 | 1.46 | K | I_New(-) |
| 18 | NONE | 0.0   | 551.0  | 0 | 100.00 | 10.96  | 10.96  | 41.16 | 1.46 | M |          |

# SIGI\_New(-)

No. of reflections used in FILE STATISTICS 80452

<B><FONT COLOR="#FF0000"><!--SUMMARY\_BEGIN-->

MTZDUMP: NO REFLECTIONS LISTED

Times: User: 0.1s System: 0.0s Elapsed: 0:01

</pre>

</html>

<!--SUMMARY\_END--></FONT></B>

<B><FONT COLOR="#FF0000"><!--SUMMARY\_BEGIN-->

<html> <!-- CCP4 HTML LOGFILE -->

<hr>

<!--SUMMARY\_END--></FONT></B>

<B><FONT COLOR="#FF0000"><!--SUMMARY\_BEGIN-->

<pre>

```
#####  
#####  
#####  
### CCP4 7.1.009: UNIQUE          version 7.1.009 :      ##  
#####  
User: yoshihisasuzuki  Run date: 25/10/2021 Run time: 11:52:18
```

Please reference: Collaborative Computational Project, Number 4. 2011.  
"Overview of the CCP4 suite and current developments". Acta Cryst. D67, 235-242.  
as well as any specific reference in the program write-up.

<!--SUMMARY\_END--></FONT></B>

Data line--- CELL 94.0711 99.3468 103.1345 90.0000 90.0000 90.0000

Data line--- SYMMETRY 'I 2 2 2'

Data line--- LABOUT F=FUNI SIGF=SIGFUNI

Data line--- RESOLUTION 1.460

Comment line--- ## This script run with the command #####

Comment line--- # /Applications/ccp4-7.1/bin/unique HKLOUT  
"/tmp/yoshihisasuzuki/merge\_roomtemp\_GI\_pf\_7\_7\_mtz.tmp"

Comment line--- #####

Reciprocal space symmetry:

Space group: "I 2 2 2" Point group: "PG222" Laue group: "mmm"

Reference asymmetric unit: "h>=0 and k>=0 and l>=0"

(change of basis may be applied)

Spacegroup 23 "I 2 2 2"

Original indices for reflection hkl with symmetry number ISYM

Bijvoet positive

| ISYM              | ISYM         | ISYM         | ISYM         |
|-------------------|--------------|--------------|--------------|
| ISYM 1 +h, +k, +l | 3 -h, -k, +l | 5 +h, -k, -l | 7 -h, +k, -l |

# Bijvoet negative

| ISYM              | ISYM         | ISYM         | ISYM         |
|-------------------|--------------|--------------|--------------|
| ISYM 2 -h, -k, -l | 4 +h, +k, -l | 6 -h, +k, +l | 8 +h, -k, +l |

Maximum and minimum Bragg spacings 1.460 10000.000 Angstroms

Limits on H, K, L. . 0 to 64 0 to 68 0 to 70

## WRITTEN OUTPUT MTZ FILE

Logical Name: HKLOUT Filename: /tmp/yoshihisasuzuki/merge\_roomtemp\_GI\_pf\_7\_7\_mtz. tmp

\* Title:

\* Base dataset:

0 HKL\_base

HKL\_base

HKL\_base

\* Number of Datasets = 0

\* Dataset ID, project/crystal/dataset names, cell dimensions, wavelength:

\* Number of Columns = 5

\* Number of Reflections = 83816

\* Missing value set to NaN in input mtz file

\* Column Labels :

H K L FUNI SIGFUNI

\* Column Types :

H H H F Q

\* Associated datasets :

0 0 0 0 0

\* Cell Dimensions : (obsolete – refer to dataset cell dimensions above)

94.0711 99.3468 103.1345 90.0000 90.0000 90.0000

\* Resolution Range :

0.00020 0.46913 ( 71.550 – 1.460 Å )

\* Sort Order :

1 2 3 0 0

\* Space group = 'I 2 2 2' (number 23)

318435 reflections tested

83816 reflections within resolution limits written to output file

<B><FONT COLOR="#FF0000"><!--SUMMARY\_BEGIN-->

UNIQUE: Normal Termination

Times: User: 0.1s System: 0.0s Elapsed: 0:00

</pre>

</html>

<!--SUMMARY\_END--></FONT></B>

<B><FONT COLOR="#FF0000"><!--SUMMARY\_BEGIN-->

<html> <!-- CCP4 HTML LOGFILE -->

<hr>

<!--SUMMARY\_END--></FONT></B>

<B><FONT COLOR="#FF0000"><!--SUMMARY\_BEGIN-->

<pre>

#####

#####

#####

### CCP4 7.1.009: FREERFLAG version 2.2 : 26/03/20##

#####

User: yoshihisasuzuki Run date: 25/10/2021 Run time: 11:52:18

Please reference: Collaborative Computational Project, Number 4. 2011.

"Overview of the CCP4 suite and current developments". Acta Cryst. D67, 235-242.

as well as any specific reference in the program write-up.

<!--SUMMARY\_END--></FONT></B>

Data line--- FREERFRAC 0.05

Data line--- END

OPENED INPUT MTZ FILE

Logical Name: HKLIN Filename: /tmp/yoshihisasuzuki/merge\_roomtemp\_GI\_pf\_7\_7\_mtz. tmp

\* Title:

\* Base dataset:

0 HKL\_base

HKL\_base

HKL\_base

\* Number of Datasets = 0

\* Dataset ID, project/crystal/dataset names, cell dimensions, wavelength:

\* Number of Columns = 5

\* Number of Reflections = 83816

\* Missing value set to NaN in input mtz file

\* Column Labels :

H K L FUNI SIGFUNI

\* Column Types :

H H H F Q

\* Associated datasets :

0 0 0 0 0

\* Cell Dimensions : (obsolete – refer to dataset cell dimensions above)

94.0711 99.3468 103.1345 90.0000 90.0000 90.0000

\* Resolution Range :

0.00020 0.46913 ( 71.550 – 1.460 Å )

\* Sort Order :

1 2 3 0 0

\* Space group = 'I 2 2 2' (number 23)

\*\*\*\*\* EPSILON ZONES – Reflection Classes and their multiplicity \*\*\*\*\*

EPSILON Zone 1

Reflections of type h00

Multiplicity 4

EPSILON Zone 2

Reflections of type 0k0

Multiplicity 4

EPSILON Zone 3

Reflections of type 00l

Multiplicity 4

EPSILON Zone 4

Reflections of type hkl

Multiplicity 2



\* Number of Columns = 6

\* Number of Reflections = 83816

\* Missing value set to NaN in input mtz file

\* Column Labels :

H K L FUNI SIGFUNI FreeR\_flag

\* Column Types :

H H H F Q I

\* Associated datasets :

0 0 0 0 0 0

\* Cell Dimensions : (obsolete – refer to dataset cell dimensions above)

94.0711 99.3468 103.1345 90.0000 90.0000 90.0000

\* Resolution Range :

0.00020 0.46913 ( 71.550 – 1.460 Å )

\* Sort Order :

1 2 3 0 0

\* Space group = 'I 2 2 2' (number 23)

Number of reflections: 83816

Number for flagged reflections for each bin:

| Reflection flag =: | Number: |   |
|--------------------|---------|---|
| 0                  | 4161    | 0 |
| 1                  | 4051    | 0 |
| 2                  | 4361    | 0 |
| 3                  | 4205    | 0 |
| 4                  | 4303    | 0 |
| 5                  | 4130    | 0 |
| 6                  | 4256    | 0 |
| 7                  | 4341    | 0 |
| 8                  | 4136    | 0 |
| 9                  | 4255    | 0 |
| 10                 | 4058    | 0 |
| 11                 | 4033    | 0 |
| 12                 | 4197    | 0 |
| 13                 | 4013    | 0 |
| 14                 | 4112    | 0 |
| 15                 | 4386    | 0 |
| 16                 | 4337    | 0 |
| 17                 | 4138    | 0 |
| 18                 | 4295    | 0 |
| 19                 | 4048    | 0 |

Averages: 9.489 4190 0

<B><FONT COLOR="#FF0000"><!--SUMMARY\_BEGIN-->

FREERFLAG: Normal termination

Times: User: 0.4s System: 0.0s Elapsed: 0:00

</pre>

</html>

<!--SUMMARY\_END--></FONT></B>

<B><FONT COLOR="#FF0000"><!--SUMMARY\_BEGIN-->

<html> <!-- CCP4 HTML LOGFILE -->

<hr>

<!--SUMMARY\_END--></FONT></B>

<B><FONT COLOR="#FF0000"><!--SUMMARY\_BEGIN-->

<pre>

```
#####  
#####  
#####  
### CCP4 7.1.009: CAD          version 7.1.009 :      ##  
#####  
User: yoshihisasuzuki  Run date: 25/10/2021 Run time: 11:52:18
```

Please reference: Collaborative Computational Project, Number 4. 2011.

"Overview of the CCP4 suite and current developments". Acta Cryst. D67, 235-242.

as well as any specific reference in the program write-up.

<!--SUMMARY\_END--></FONT></B>

Data line--- LABI FILE 2 E1=FreeR\_flag

Data line--- LABI FILE 1 ALLIN

Data line--- END

No CTYP lines input for file: 1

No CTYP lines input for file: 2

Indices output even if all data items flagged "missing"

Warning, NOT all LABOUT data lines given

Warning, NOT all LABOUT data lines given

OPENED INPUT MTZ FILE

Logical Name: HKLIN1

Filename:

/tmp/yoshihisasuzuki/merge\_roomtemp\_GI\_pf\_7\_5\_mtz\_New.tmp

\* Title:

From Clipper CCP4MTZfile

\* Base dataset:

0 HKL\_base  
HKL\_base  
HKL\_base

\* Number of Datasets = 1

\* Dataset ID, project/crystal/dataset names, cell dimensions, wavelength:

1 New  
New  
New  
94.0711 99.3468 103.1345 90.0000 90.0000 90.0000  
0.89999

\* Number of Columns = 18

\* Number of Reflections = 80452

\* Missing value set to NaN in input mtz file

\* Column Labels :

H K L F\_New SIGF\_New DANO\_New SIGDANO\_New F\_New(+) SIGF\_New(+) F\_New(-) SIGF\_New(-)  
ISYM\_New IMEAN\_New SIGIMEAN\_New I\_New(+) SIGI\_New(+) I\_New(-) SIGI\_New(-)

\* Column Types :

H H H F Q D Q G L G L Y J Q K M K M

\* Associated datasets :

0 0 0 1 1 1 1 1 1 1 1 1 1 1 1 1

\* Cell Dimensions : (obsolete – refer to dataset cell dimensions above)

94.0711 99.3468 103.1345 90.0000 90.0000 90.0000

\* Resolution Range :

0.00059 0.46913 ( 41.156 – 1.460 Å )

\* Sort Order :

0 0 0 0 0

\* Space group = 'I 2 2 2' (number 23)

(only pointgroup is fixed so far)

Reciprocal space symmetry:

Space group: "I 2 2 2" Point group: "PG222" Laue group: "mmm"

Reference asymmetric unit: "h>=0 and k>=0 and l>=0"

(change of basis may be applied)

Spacegroup 23 "I 2 2 2"

Original indices for reflection hkl with symmetry number ISYM

Bijvoet positive

| ISYM |              | ISYM         |              | ISYM         |  | ISYM |  |
|------|--------------|--------------|--------------|--------------|--|------|--|
| ISYM | 1 +h, +k, +l | 3 +h, -k, -l | 5 -h, +k, -l | 7 -h, -k, +l |  |      |  |

Bijvoet negative

| ISYM |  | ISYM |  | ISYM |  | ISYM |  |
|------|--|------|--|------|--|------|--|
|------|--|------|--|------|--|------|--|

ISYM 2 -h, -k, -l 4 -h, +k, +l 6 +h, -k, +l 8 +h, +k, -l

Chosen Asymmetric unit of reciprocal space:

[mmm] hkl:h>=0, k>=0, l>=0

\*\* "Missing" flag set in HKLIN1 to Nan:

\*\* "Missing" entries LISTED as -999.000

Data line--- LABIN E1=F\_New E2=SIGF\_New E3=DANO\_New E4=SIGDANO\_New E5=F\_New(+)  
E6=SIGF\_New(+) E7=F\_New(-) E8=SIGF\_New(-) E9=ISYM\_New E10=IMEAN\_New  
E11=SIGIMEAN\_New E12=I\_New(+) E13=SIGI\_New(+) E14=I\_New(-) E15=SIGI\_New(-)

After Processing File\_Number: 1

Number of columns so far : 18

Accumulated Out\_Put\_MTZ\_labels are:

E11=F\_New E21=SIGF\_New E31=DANO\_New E41=SIGDANO\_New  
E51=F\_New(+) E61=SIGF\_New(+) E71=F\_New(-) E81=SIGF\_New(-)  
E91=ISYM\_New E101=IMEAN\_New E111=SIGIMEAN\_New E121=I\_New(+)  
E131=SIGI\_New(+) E141=I\_New(-) E151=SIGI\_New(-)

MTZOUT\_LABELS are H K L and -

F\_New SIGF\_New DANO\_New SIGDANO\_New  
F\_New(+) SIGF\_New(+) F\_New(-) SIGF\_New(-)  
ISYM\_New IMEAN\_New SIGIMEAN\_New I\_New(+)  
SIGI\_New(+) I\_New(-) SIGI\_New(-)

OPENED INPUT MTZ FILE

Logical Name: HKLIN2 Filename: /tmp/yoshihisasuzuki/merge\_roomtemp\_GI\_pf\_7\_8\_mtz.tmp

\* Title:

\* Base dataset:

0 HKL\_base

HKL\_base

HKL\_base

\* Number of Datasets = 0

\* Dataset ID, project/crystal/dataset names, cell dimensions, wavelength:

\* Number of Columns = 6

\* Number of Reflections = 83816

\* Missing value set to NaN in input mtz file

\* Column Labels :

H K L FUNI SIGFUNI FreeR\_flag

\* Column Types :

H H H F Q I

\* Associated datasets :

0 0 0 0 0 0

\* Cell Dimensions : (obsolete - refer to dataset cell dimensions above)

94.0711 99.3468 103.1345 90.0000 90.0000 90.0000

\* Resolution Range :

0.00020 0.46913 ( 71.550 - 1.460 Å )

\* Sort Order :

1 2 3 0 0

\* Space group = 'I 2 2 2' (number 23)

Data line--- LABIN E1=FreeR\_flag

After Processing File\_Number: 2

Number of columns so far : 19

Accumulated Out\_Put\_MTZ\_labels are:

E11=F\_New E21=SIGF\_New E31=DANO\_New E41=SIGDANO\_New

E51=F\_New(+) E61=SIGF\_New(+) E71=F\_New(-) E81=SIGF\_New(-)

E91=ISYM\_New E101=IMEAN\_New E111=SIGIMEAN\_New E121=I\_New(+)

E131=SIGI\_New(+) E141=I\_New(-) E151=SIGI\_New(-) E12=FreeR\_flag

MTZOUT\_LABELS are H K L and -

F\_New SIGF\_New DANO\_New SIGDANO\_New

F\_New(+) SIGF\_New(+) F\_New(-) SIGF\_New(-)

ISYM\_New IMEAN\_New SIGIMEAN\_New I\_New(+)

SIGI\_New(+) I\_New(-) SIGI\_New(-) FreeR\_flag

3 sort keys, in columns    1    2    3

Data line--- LABIN   E1=F\_New   E2=SIGF\_New   E3=DANO\_New   E4=SIGDANO\_New   E5=F\_New(+)  
E6=SIGF\_New(+)  
E7=F\_New(-)  
E8=SIGF\_New(-)  
E9=ISYM\_New  
E10=IMEAN\_New  
E11=SIGIMEAN\_New   E12=I\_New(+)  
E13=SIGI\_New(+)  
E14=I\_New(-)  
E15=SIGI\_New(-)

OPENED INPUT MTZ FILE

Logical                    Name:                    HKLIN1                    Filename:  
/tmp/yoshihisasuzuki/merge\_roomtemp\_GI\_pf\_7\_5\_mtz\_New.tmp

\* Title:

From Clipper CCP4MTZfile

\* Base dataset:

0 HKL\_base

HKL\_base

HKL\_base

\* Number of Datasets = 1

\* Dataset ID, project/crystal/dataset names, cell dimensions, wavelength:

1 New

New

New

94.0711    99.3468    103.1345    90.0000    90.0000    90.0000

0.89999

\* Number of Columns = 18

\* Number of Reflections = 80452

\* Missing value set to NaN in input mtz file

\* Column Labels :

H K L F\_New SIGF\_New DANO\_New SIGDANO\_New F\_New(+) SIGF\_New(+) F\_New(-) SIGF\_New(-)  
ISYM\_New IMEAN\_New SIGIMEAN\_New I\_New(+) SIGI\_New(+) I\_New(-) SIGI\_New(-)

\* Column Types :

H H H F Q D Q G L G L Y J Q K M K M

\* Associated datasets :

0 0 0 1 1 1 1 1 1 1 1 1 1 1 1 1 1

\* Cell Dimensions : (obsolete - refer to dataset cell dimensions above)

94.0711 99.3468 103.1345 90.0000 90.0000 90.0000

\* Resolution Range :

0.00059 0.46913 ( 41.156 - 1.460 Å )

\* Sort Order :

0 0 0 0 0

\* Space group = 'I 2 2 2' (number 23)

(only pointgroup is fixed so far)

Column pairs- F+ F-: 8 10

Column pairs- F+ F-: 10 8

Column pairs - SIGs: 9 11

Column pairs - SIGs: 11 9

Column pairs - SIGs: 16 18

Column pairs - SIGs: 18 16

Column pairs - I+ I-: 15 17

Column pairs - I+ I-: 17 15

Reading from HKLIN mtz file\_Number = :1

This file written with MTZLIB Version Number : MTZ:V1.1

File HKLIN1 contains a total of 18 Columns

and a total of 80452 Reflections

\*\*\*\*\* EPSILON ZONES - Reflection Classes and their multiplicity \*\*\*\*\*

EPSILON Zone 1

Reflections of type h00

Multiplicity 4

EPSILON Zone 2

Reflections of type 0k0

Multiplicity 4

EPSILON Zone 3

Reflections of type 00l

Multiplicity 4

EPSILON Zone 4

Reflections of type hkl

Multiplicity 2

\*\*\*\*\* CENTRIC ZONES \*\*\*\*\*

CENTRIC Zone 1

Reflections of type 0kl

CENTRIC Zone 2

Reflections of type h0l

CENTRIC Zone 3

Reflections of type hk0

For file HKLIN1

Total Number of HKL read = 80452

Total Number of HKL systematic absent = 0  
Total Number of HKL reject for resolution limits = 0  
Total Number of HKL passed to sort for this file = 85122  
Data line--- LABIN E1=FreeR\_flag

OPENED INPUT MTZ FILE

Logical Name: HKLIN2 Filename: /tmp/yoshihisasuzuki/merge\_roomtemp\_GI\_pf\_7\_8\_mtz.tmp

\* Title:

\* Base dataset:

0 HKL\_base  
HKL\_base  
HKL\_base

\* Number of Datasets = 0

\* Dataset ID, project/crystal/dataset names, cell dimensions, wavelength:

\* Number of Columns = 6

\* Number of Reflections = 83816

\* Missing value set to NaN in input mtz file

\* Column Labels :

H K L FUNI SIGFUNI FreeR\_flag

\* Column Types :

H H H F Q I

\* Associated datasets :

0 0 0 0 0 0

\* Cell Dimensions : (obsolete – refer to dataset cell dimensions above)

94.0711 99.3468 103.1345 90.0000 90.0000 90.0000

\* Resolution Range :

0.00020 0.46913 ( 71.550 – 1.460 Å )

\* Sort Order :

1 2 3 0 0

\* Space group = 'I 2 2 2' (number 23)

Reading from HKLIN mtz file\_Number = :2

This file written with MTZLIB Version Number : MTZ:V1.1

File HKLIN2 contains a total of 6 Columns

and a total of 83816 Reflections

For file HKLIN2

Total Number of HKL read = 83816

Total Number of HKL systematic absent = 0

Total Number of HKL reject for resolution limits = 0

Total Number of HKL passed to sort for this file = 89409

Total number read for all files = 164268

Total passed to sort for all files = 174531

Total number systematic absent = 0

Total number rejected outside resol= 0

Number of columns per file:

File\_Number = 1 Number\_Columns\_Selected = 15

File\_Number = 2 Number\_Columns\_Selected = 1

Data line--- LABOUT E11=F\_New E21=SIGF\_New E31=DANO\_New E41=SIGDANO\_New E51=F\_New(+)  
E61=SIGF\_New(+) E71=F\_New(-) E81=SIGF\_New(-) E91=ISYM\_New E101=IMEAN\_New  
E111=SIGIMEAN\_New E121=I\_New(+) E131=SIGI\_New(+) E141=I\_New(-) E151=SIGI\_New(-)  
E12=FreeR\_flag

WRITTEN OUTPUT MTZ FILE

Logical Name: HKLOUT Filename: /tmp/yoshihisasuzuki/merge\_roomtemp\_GI\_pf\_7\_9\_mtz.tmp

\* Title:

From Clipper CCP4MTZfile

\* Base dataset:

0 HKL\_base

HKL\_base

HKL\_base

\* Number of Datasets = 1

\* Dataset ID, project/crystal/dataset names, cell dimensions, wavelength:

1 New

New

New

94.0711 99.3468 103.1345 90.0000 90.0000 90.0000  
0.89999

\* Number of Columns = 19

\* Number of Reflections = 83816

\* Missing value set to NaN in input mtz file

\* Column Labels :

H K L FreeR\_flag F\_New SIGF\_New DANO\_New SIGDANO\_New F\_New(+) SIGF\_New(+) F\_New(-)  
SIGF\_New(-) ISYM\_New IMEAN\_New SIGIMEAN\_New I\_New(+) SIGI\_New(+) I\_New(-) SIGI\_New(-)

\* Column Types :

H H H I F Q D Q G L G L Y J Q K M K M

\* Associated datasets :

0 0 0 0 1 1 1 1 1 1 1 1 1 1 1 1 1 1

\* Cell Dimensions : (obsolete – refer to dataset cell dimensions above)

94.0711 99.3468 103.1345 90.0000 90.0000 90.0000

\* Resolution Range :

0.00020 0.46913 ( 71.550 - 1.460 A )

\* Sort Order :

1 2 3 0 0

\* Space group = 'I 2 2 2' (number 23)

(only pointgroup is fixed so far)

Total number from Sorting Routine = 174531

Final Total of Unique records to HKLOUT = 83816

Final Total of Missing records to HKLOUT = 0

<B><FONT COLOR="#FF0000"><!--SUMMARY\_BEGIN-->

CAD: \*\*\* Normal Termination of CAD \*\*\*

Times: User: 0.6s System: 0.1s Elapsed: 0:01

</pre>

</html>

<!--SUMMARY\_END--></FONT></B>

<B><FONT COLOR="#FF0000"><!--SUMMARY\_BEGIN-->

<html> <!-- CCP4 HTML LOGFILE -->

<hr>

<!--SUMMARY\_END--></FONT></B>

<B><FONT COLOR="#FF0000"><!--SUMMARY\_BEGIN-->

<pre>

#####  
#####  
#####  
### CCP4 7.1.009: FREERFLAG version 2.2 : 26/03/20##

#####

User: yoshihisasuzuki Run date: 25/10/2021 Run time: 11:52:19

Please reference: Collaborative Computational Project, Number 4. 2011.

"Overview of the CCP4 suite and current developments". Acta Cryst. D67, 235-242.

as well as any specific reference in the program write-up.

<!--SUMMARY\_END--></FONT></B>

Data line--- COMPLETE FREE=FreeR\_flag

Data line--- END

OPENED INPUT MTZ FILE

Logical Name: HKLIN Filename: /tmp/yoshihisasuzuki/merge\_roomtemp\_GI\_pf\_7\_9\_mtz.tmp

\* Title:

From Clipper CCP4MTZfile

\* Base dataset:

0 HKL\_base

HKL\_base

HKL\_base

\* Number of Datasets = 1

\* Dataset ID, project/crystal/dataset names, cell dimensions, wavelength:

1 New

New

New

94.0711 99.3468 103.1345 90.0000 90.0000 90.0000

0.89999

\* Number of Columns = 19

\* Number of Reflections = 83816

\* Missing value set to NaN in input mtz file

\* Column Labels :

H K L FreeR\_flag F\_New SIGF\_New DANO\_New SIGDANO\_New F\_New(+) SIGF\_New(+) F\_New(-)  
SIGF\_New(-) ISYM\_New IMEAN\_New SIGIMEAN\_New I\_New(+) SIGI\_New(+) I\_New(-) SIGI\_New(-)

\* Column Types :

H H H I F Q D Q G L G L Y J Q K M K M

\* Associated datasets :

0 0 0 0 1 1 1 1 1 1 1 1 1 1 1 1 1 1

\* Cell Dimensions : (obsolete - refer to dataset cell dimensions above)

94.0711 99.3468 103.1345 90.0000 90.0000 90.0000

\* Resolution Range :

0.00020 0.46913 ( 71.550 - 1.460 Å )

\* Sort Order :

1 2 3 0 0

\* Space group = 'I 2 2 2' (number 23)

(only pointgroup is fixed so far)

\*\*\*\*\* EPSILON ZONES - Reflection Classes and their multiplicity \*\*\*\*\*

EPSILON Zone 1

Reflections of type h00

Multiplicity 4

EPSILON Zone 2

Reflections of type 0k0

Multiplicity 4

EPSILON Zone 3

Reflections of type 00l

Multiplicity 4

EPSILON Zone 4

Reflections of type hkl

Multiplicity 2

Grid of reflections initialized:

H K L min -66 -70 -72

H K L max 66 70 72

H K L inc 133 141 145

ngrid 2719185

\*\*\*\*\* Twin laws are not used but reflections that are symmetry equivalent in the crystal point group acquire the same flag.

lookup = 1 2 3 4

lsprgi = H K

L FREE

\*\*\*\*\* COMPLETE keyword was used.

The number of missing flags = 0

\*\*\*\*\* All Reflections binned into 20 segments

\*\*\* labelled 0 through to 19 \*\*\*\*\*

Number of symmetry operations in the composition point group: 4

#### WRITTEN OUTPUT MTZ FILE

Logical Name: HKLOUT Filename:  
/Users/yoshihisasuzuki/Documents/JCCG50/merge\_roomtemp\_GI\_pf/collection\_pointless1\_scaled1.mtz

\* Title:

From Clipper CCP4MTZfile

\* Base dataset:

0 HKL\_base

HKL\_base

HKL\_base

\* Number of Datasets = 1

\* Dataset ID, project/crystal/dataset names, cell dimensions, wavelength:

1 New

New

New

94.0711 99.3468 103.1345 90.0000 90.0000 90.0000  
0.89999

\* Number of Columns = 19

\* Number of Reflections = 83816

\* Missing value set to NaN in input mtz file

\* Column Labels :

H K L FreeR\_flag F\_New SIGF\_New DANO\_New SIGDANO\_New F\_New(+) SIGF\_New(+) F\_New(-)  
SIGF\_New(-) ISYM\_New IMEAN\_New SIGIMEAN\_New I\_New(+) SIGI\_New(+) I\_New(-) SIGI\_New(-)

\* Column Types :

H H H I F Q D Q G L G L Y J Q K M K M

\* Associated datasets :

0 0 0 0 1 1 1 1 1 1 1 1 1 1 1 1 1 1

\* Cell Dimensions : (obsolete – refer to dataset cell dimensions above)

94.0711 99.3468 103.1345 90.0000 90.0000 90.0000

\* Resolution Range :

0.00020 0.46913 ( 71.550 – 1.460 Å )

\* Sort Order :

1 2 3 0 0

\* Space group = 'I 2 2 2' (number 23)

(only pointgroup is fixed so far)

Number of reflections: 83816

Number for flagged reflections for each bin:

| Reflection flag =: | Number: |      |  |
|--------------------|---------|------|--|
| 0                  | 4159    | 4159 |  |
| 1                  | 4074    | 4074 |  |
| 2                  | 4199    | 4199 |  |
| 3                  | 4113    | 4113 |  |
| 4                  | 4199    | 4199 |  |
| 5                  | 4215    | 4215 |  |
| 6                  | 4240    | 4240 |  |
| 7                  | 4184    | 4184 |  |
| 8                  | 4141    | 4141 |  |
| 9                  | 4174    | 4174 |  |
| 10                 | 4219    | 4219 |  |
| 11                 | 4235    | 4235 |  |
| 12                 | 4132    | 4132 |  |
| 13                 | 4141    | 4141 |  |
| 14                 | 4179    | 4179 |  |
| 15                 | 4244    | 4244 |  |
| 16                 | 4375    | 4375 |  |
| 17                 | 4243    | 4243 |  |
| 18                 | 4169    | 4169 |  |
| 19                 | 4181    | 4181 |  |

Averages: 9.534 4190 4190

<B><FONT COLOR="#FF0000"><!--SUMMARY\_BEGIN-->

FREERFLAG: Normal termination

Times: User: 0.5s System: 0.1s Elapsed: 0:01

</pre>

</html>

<!--SUMMARY\_END--></FONT></B>

#CCP4I TERMINATION STATUS 1

#CCP4I TERMINATION TIME 25 Oct 2021 11:52:23

#CCP4I TERMINATION OUTPUT\_FILES /tmp/yoshihisasuzuki/merge\_roomtemp\_GI\_pf\_7\_2\_mtz. tmp  
merge\_roomtemp\_GI\_pf

/Users/yoshihisasuzuki/Documents/JCCG50/merge\_roomtemp\_GI\_pf/merge\_roomtemp\_GI\_pf\_7. sc  
ales merge\_roomtemp\_GI\_pf

/Users/yoshihisasuzuki/Documents/JCCG50/merge\_roomtemp\_GI\_pf/merge\_roomtemp\_GI\_pf\_7\_ro  
gues. log merge\_roomtemp\_GI\_pf

/Users/yoshihisasuzuki/Documents/JCCG50/merge\_roomtemp\_GI\_pf/merge\_roomtemp\_GI\_pf\_7\_no  
rmplot. xmgr merge\_roomtemp\_GI\_pf

/Users/yoshihisasuzuki/Documents/JCCG50/merge\_roomtemp\_GI\_pf/merge\_roomtemp\_GI\_pf\_7\_an  
omplot. xmgr merge\_roomtemp\_GI\_pf

/Users/yoshihisasuzuki/Documents/JCCG50/merge\_roomtemp\_GI\_pf/merge\_roomtemp\_GI\_pf\_7\_ro  
gueplot. xmgr merge\_roomtemp\_GI\_pf

/Users/yoshihisasuzuki/Documents/JCCG50/merge\_roomtemp\_GI\_pf/merge\_roomtemp\_GI\_pf\_7\_co  
rrelplot. xmgr merge\_roomtemp\_GI\_pf

/Users/yoshihisasuzuki/Documents/JCCG50/merge\_roomtemp\_GI\_pf/merge\_roomtemp\_GI\_pf\_7\_ai  
mless\_pipe.xml merge\_roomtemp\_GI\_pf

#CCP4I MESSAGE Task completed successfully
